# Supplementary material for: Systematic review of systematic reviews for effectiveness of internal fixation for flail chest and rib fractures in adults
Source: PubMed Central journal article supplement — BMJ Open. 2019 Apr 1;9(4):e023444. doi: 10.1136/bmjopen-2018-023444 (PMC6500198; doi:10.1136/bmjopen-2018-023444), 2019-04-01
Supplement: bmjopen-2018-023444.draft_revisions.pdf [file bmjopen-2018-023444.draft_revisions.pdf]

# BMJ Open

BMJ Open is committed to open peer review. As part of this commitment we make the peer review history of every article we publish publicly available.

When an article is published we post the peer reviewers' comments and the authors' responses online. We also post the versions of the paper that were used during peer review. These are the versions that the peer review comments apply to.

The versions of the paper that follow are the versions that were submitted during the peer review process. They are not the versions of record or the final published versions. They should not be cited or distributed as the published version of this manuscript.

BMJ Open is an open access journal and the full, final, typeset and author-corrected version of record of the manuscript is available on our site with no access controls, subscription charges or pay-per-view fees (<http://bmjopen.bmj.com>).

If you have any questions on BMJ Open's open peer review process please email [info.bmjopen@bmj.com](mailto:info.bmjopen@bmj.com)

# BMJ Open

## A systematic review of systematic reviews for effectiveness of internal fixation for flail chest and rib fractures in adults

|                               |                                                                                                                                                                                                                                                                                                                                                                                                                                                                                                                                             |
|-------------------------------|---------------------------------------------------------------------------------------------------------------------------------------------------------------------------------------------------------------------------------------------------------------------------------------------------------------------------------------------------------------------------------------------------------------------------------------------------------------------------------------------------------------------------------------------|
| Journal:                      | <i>BMJ Open</i>                                                                                                                                                                                                                                                                                                                                                                                                                                                                                                                             |
| Manuscript ID                 | bmjopen-2018-023444                                                                                                                                                                                                                                                                                                                                                                                                                                                                                                                         |
| Article Type:                 | Research                                                                                                                                                                                                                                                                                                                                                                                                                                                                                                                                    |
| Date Submitted by the Author: | 10-Apr-2018                                                                                                                                                                                                                                                                                                                                                                                                                                                                                                                                 |
| Complete List of Authors:     | Ingoe, Helen; York Trials Unit, Health Sciences; The James Cook University Hospital, Trauma and Orthopaedics<br>Coleman, Elizabeth; York Trials Unit, Health Sciences<br>Eardley, Willaim; The James Cook University Hospital, Trauma and Orthopaedics; York Trials Unit, Health Sciences<br>Rangan, Amar; The James Cook University Hospital, Trauma and Orthopaedics; University of York, Department of Health Sciences<br>Hewitt, Catherine; York Trials Unit, Health Sciences<br>McDaid, Catriona; University of York, York Trials Unit |
| Keywords:                     | Rib fracture, Flail Chest, Internal fixation, Systematic review, mechanical ventilation, Multiple rib fractures                                                                                                                                                                                                                                                                                                                                                                                                                             |
|                               |                                                                                                                                                                                                                                                                                                                                                                                                                                                                                                                                             |

SCHOLARONE™  
Manuscripts

1  
2  
3  
4  
5  
6  
7  
8  
9  
10  
11  
12  
13  
14  
15  
16  
17  
18  
19  
20  
21  
22  
23  
24  
25  
26  
27  
28  
29  
30  
31  
32  
33  
34  
35  
36

# A SYSTEMATIC REVIEW OF SYSTEMATIC REVIEWS FOR EFFECTIVENESS OF INTERNAL FIXATION FOR FLAIL CHEST AND RIB FRACTURES IN ADULTS

Corresponding author

Helen MA Ingoe <sup>1,2</sup> [helen.ingoe@york.ac.uk](mailto:helen.ingoe@york.ac.uk) Telephone 01904 321830

ORCID ID 0000-0003-1623-8489

Elizabeth Coleman <sup>1</sup> [izzy.coleman@york.ac.uk](mailto:izzy.coleman@york.ac.uk) ORCID ID 0000-0003-4210-1865

William Eardley <sup>1,2</sup> [william.eardley@york.ac.uk](mailto:william.eardley@york.ac.uk) ORCID ID 0000-0003-1980-8520

Amar Rangan <sup>1,2</sup> [amar.rangan@york.ac.uk](mailto:amar.rangan@york.ac.uk) ORCID ID 0000-0003-0412-2614

Catherine Hewitt <sup>1</sup> [catherine.hewitt@york.ac.uk](mailto:catherine.hewitt@york.ac.uk) ORCID ID 0000-0002-0415-3536

Catriona McDaid <sup>1</sup> [catriona.mcdaid@york.ac.uk](mailto:catriona.mcdaid@york.ac.uk) ORCID ID 0000-0002-3751-7260

## AFFILIATIONS

<sup>1</sup> York Trials Unit, Department of Health Sciences, ARRC Building, University of York,  
Heslington, York, YO10 5DD

<sup>2</sup> The James Cook University Hospital, Marton Road, Middlesbrough, TS4 3BW

**WORD COUNT** 6140

## ABSTRACT

### Objectives

Multiple systematic reviews have reported on the impact of rib fracture fixation in the presence of flail chest and multiple rib fractures however, this practice remains

1 controversial. Our aim is to synthesise the effectiveness of surgical fixation of flail chest  
2 and ribs fractures as evidenced by systematic reviews.  
3  
4

## 5 **Design**

6  
7 A systematic search identified systematic reviews comparing effectiveness of rib fracture  
8 fixation with non-operative management of adults in the presence of flail chest or multiple  
9 rib fractures. Risk of bias was assessed using the ROBIS tool.  
10  
11  
12  
13

## 14 **Results**

15  
16 Twelve systematic reviews were synthesised. Length of mechanical ventilation was  
17 shorter in the fixation group compared to the non-operative group in flail chest; pooled  
18 estimates ranged from -4.52 days, 95% CI [-5.54, -3.5] to -7.5 days, 95% CI [-9.9,-5.5].  
19  
20 Pneumonia, length of hospital and ICU stay all showed a statistically significant  
21 improvement in favour of fixation; however all outcomes in favour of fixation had  
22 substantial heterogeneity. Mortality rate did not statistically improve with fixation compared  
23 to non-operative management. Two systematic reviews reported multiple rib fracture  
24 fixation but due to lack of evidence were not able to confer any benefit of fixation over  
25 non-operative management.  
26  
27  
28  
29  
30  
31  
32  
33  
34

## 35 **Conclusions**

36  
37 The synthesis has shown some statistically significant improvement in patient outcomes  
38 with flail chest after internal surgical fixation. However due to differences in indications  
39 and timing of fixation in the primary studies, results are confounded by substantial clinical  
40 heterogeneity. For future review updates, meta-analysis for effectiveness may need to  
41 take into account indications and timing of surgery as a subgroup analysis to address  
42 clinical heterogeneity between primary studies.  
43  
44  
45  
46  
47  
48  
49

## 50 **Study Registration**

51 PROSPERO ID 42016053494  
52  
53  
54  
55

## 56 **KEY WORDS**

1 Rib fracture; Flail chest; Multiple rib fractures; Internal fixation; Systematic review;  
2 meta-analysis; mortality; mechanical ventilation; length of  
3 hospital stay; pneumonia  
4  
5  
6

## 7 **STRENGTHS AND LIMITATIONS OF THIS STUDY**

- 9 • Multiple databases were searched for studies and study selection was undertaken  
10 by two researchers, reducing the risk of error  
11
- 12 • Risk of bias of studies was assessed using the ROBIS tool by two researchers  
13
- 14 • Primary research within the reviews was assessed to identify if the reviews were  
15 based on the same primary evidence  
16
- 17 • Synthesises all identified reviews regardless of risk of bias  
18  
19  
20  
21  
22  
23  
24  
25  
26  
27  
28  
29  
30  
31  
32  
33  
34  
35  
36  
37  
38  
39  
40  
41  
42  
43  
44  
45  
46  
47  
48  
49  
50  
51  
52  
53  
54  
55  
56  
57  
58  
59  
60

## INTRODUCTION

Severe chest wall injuries which include multiple rib fractures (adjacent unifocal fractures) and flail chest (three or more adjacent bifocal rib fractures with paradoxical chest wall movement) have high morbidity and mortality (18.7%) due to the associated complications of acute respiratory distress syndrome, pneumonia and haemorrhage.<sup>1</sup> Chest trauma present in 15% of all trauma admissions<sup>2</sup> with the most common mechanism of injury, a road traffic accident (57.01%) and falls accounting for the second biggest proportion(22.96%).<sup>1</sup> Flail chest in particular has a high mortality rate as chest wall biomechanics are disrupted causing an increase in the work of breathing for patients who are often in significant pain.

Current treatment options for multiple rib fractures and flail chest are generally supportive measures including oral and regional anaesthesia, and non-invasive and invasive ventilation.<sup>3</sup> Surgical fixation is thought to be beneficial to patients with respiratory failure,<sup>4</sup> intractable pain<sup>5</sup> or if failing to wean from invasive ventilation secondary to flail chest or multiple rib fractures.<sup>6,7</sup> Surgical fixation has the potential to restore chest wall biomechanics and reduce the respiratory complications associated with poor ventilation and secretion clearance.<sup>7</sup> Due to the rapidly, albeit heterogeneous, growing evidence base from multiple systematic reviews it is essential to synthesise evidence for this intervention to ascertain safety and efficacy.

This report is part of a wider systematic review to (i) identify and synthesise the evidence of the effectiveness of internal surgical rib fracture fixation, (ii) to evaluate the evidence for indications and timing of surgical fixation, and (iii) to identify the outcomes reported in the literature. Systematic reviews and primary studies were eligible for inclusion. This paper maps and synthesises the systematic review evidence assessing the effectiveness of internal surgical fixation of rib fractures.

## METHODS

1 The review was undertaken systematically using the methods described by the Centre for  
2 Reviews and Dissemination.<sup>8</sup> The protocol was registered on PROSPERO and can be  
3  
4 accessed at

5  
6 [https://www.crd.york.ac.uk/PROSPERO/display\\_record.asp?ID=CRD42016053494](https://www.crd.york.ac.uk/PROSPERO/display_record.asp?ID=CRD42016053494).

## 8 9 **Eligibility criteria**

### 10 11 **Population**

12  
13  
14 The eligible population were adults (over 18 years) who have sustained one or more rib  
15 fractures following blunt chest trauma, with or without pulmonary contusion. Single rib  
16 fracture, multiple rib fractures and flail chest injuries were included but treated as separate  
17 injuries and therefore reported and analysed separately. Patients with penetrating injuries  
18 were excluded. Studies of mixed populations with penetrating and non-penetrating injuries  
19 were included only if data were presented separately for the two groups. Surgery for  
20 chronic non-union was excluded.  
21  
22  
23  
24  
25  
26  
27

### 28 29 **Intervention**

30  
31  
32 Any method of internal surgical fixation such as plate or strut fixation; metal or synthetic  
33 material including intramedullary splints and suture fixation were eligible for inclusion.  
34  
35

### 36 37 **Comparator**

38  
39  
40 External surgical fixation (defined as traction methods, splints and Hoffman style pin and  
41 bar fixation) and non-surgical management (such as supportive ventilation, epidural and  
42 regional anaesthesia).  
43  
44  
45

### 46 47 **Outcomes**

48  
49 All outcomes were eligible for inclusion (e.g. mortality, pain and pneumonia). The primary  
50 outcome of interest was duration of mechanical ventilation due to the close relationship  
51 with mortality and morbidity of ventilator associated complications.  
52  
53  
54  
55

### 56 57 **Study design:**

1 *Inclusion:* Systematic reviews were included if they specified a search strategy in at least  
2 one literature database and included primary research. No restrictions were placed on the  
3 study design of the primary studies.  
4  
5

6  
7 *Exclusion:* Literature reviews that did not have a defined research question, search  
8 strategy or defined process of selecting articles.  
9  
10

### 11 **Search strategy**

12 An electronic database search was undertaken on 14 December 2016 and updated on 13  
14 March 2017. Searches for systematic reviews included the following databases:  
15 MEDLINE including PreMEDLINE, EMBASE, Cochrane Database of Systematic Reviews  
16 (CDSR) and Science Citation Index. Clinical guidance, policy documents and relevant  
17 databases such as NICE Evidence were searched. These included the UK Department of  
18 Health policy content, National Clinical Guideline Centre, and Scottish Intercollegiate  
19 Guidelines Network (SIGN). An additional search for non-published literature within the  
20 Conference Proceedings Citation Index was undertaken.  
21  
22

23 The start date for the MEDLINE searches was 1976 as that was the year that Advance  
24 Trauma Life Support was introduced internationally, incorporating new methods of  
25 resuscitation which have significantly improved outcomes. No other restrictions were  
26 applied.  
27  
28

29 The search strategy, developed for MEDLINE, is provided in **Supplementary File 1** and  
30 was adapted to run appropriately on other databases. To identify relevant further reviews  
31 reference lists of included studies were assessed for eligibility.  
32  
33

### 34 **Selection**

35 Searches were downloaded into Endnote X7 (Clarivate Analytics, Version 7.1 release  
36 date 2/04/2014) and de-duplicated. Two researchers (HI and EC) independently screened  
37 titles and abstracts. Any paper classified as potentially eligible by either reviewer was  
38 ordered as a full text and independently screened by both reviewers. It was originally  
39 planned to have second screening of only 50% but resources allowed for full duplicate  
40  
41  
42  
43  
44  
45  
46  
47  
48  
49  
50  
51  
52  
53  
54  
55  
56  
57  
58  
59  
60



1 screening. A third researcher reviewed disagreements (CM) where a consensus could not  
2 be reached between the researchers.  
3  
4

### 5 **Data extraction**

6  
7 Extracted data included patient characteristics; intervention and comparators, outcome  
8 measures, as well as duration of follow up, and effect estimates, standard errors and  
9 confidence intervals as available. Outcomes that were not subject to meta-analysis and  
10 were presented as a narrative synthesis in the systematic reviews were extracted and  
11 presented as a narrative synthesis and included effect sizes, standard deviations and  
12 significance values. A description of study methods and information about the study  
13 including country and year were also extracted.  
14  
15  
16  
17  
18  
19  
20  
21

22 One researcher completed data extraction (HI); a second researcher cross-checked 50%  
23 (EC). Discrepancies were cross-checked by both researchers at a second review and a  
24 consensus reached.  
25  
26  
27  
28

### 29 **Risk of bias**

30  
31 Quality assessment with the ROBIS Tool<sup>9</sup> was undertaken by one researcher(HI) and  
32 checked by a second (CM). Discrepancies were resolved by discussion.  
33  
34  
35

### 36 **Data synthesis**

37  
38 All types of internal surgical fixation were synthesised as one group. Flail chest and  
39 multiple rib fractures are considered different injuries and have been synthesised  
40 separately for each outcome extracted. Each outcome was narratively synthesised  
41 including number of reviews using the outcome and effect estimates with 95% confidence  
42 intervals from the source review. Important numerical data was presented in tables for all  
43 outcomes measured. All outcomes that were reported in the reviews were included in the  
44 report to avoid reporting bias.<sup>10</sup> Although not fully applicable, reporting was in accordance  
45 as much as possible with the PRISMA statement.<sup>11</sup>  
46  
47  
48  
49  
50  
51  
52  
53

### 54 **Protocol Deviations**

1 The registered protocol encompasses a larger body of work which includes synthesis of  
2 primary research for effectiveness, indications for surgery, timing of surgery and mapping  
3 of outcome measures. Only the synthesis of systematic reviews is reported here. Although  
4 all outcomes were extracted and presented in tables only those that were measured in  
5 two or more studies were narratively synthesised.  
6  
7  
8  
9

### 10 **Patient involvement**

11 Patients were not involved in the preparation or conduct of this review.  
12  
13  
14  
15  
16  
17  
18  
19  
20  
21  
22  
23  
24  
25  
26  
27  
28  
29  
30  
31  
32  
33  
34  
35  
36  
37  
38  
39  
40  
41  
42  
43  
44  
45  
46  
47  
48  
49  
50  
51  
52  
53  
54  
55  
56  
57  
58  
59  
60

For peer review only

## RESULTS

Electronic searches identified 791 records; an additional 39 records were collected following reference checking. The full text screening identified 12 systematic reviews eligible for inclusion, there were 21 papers excluded because they were not classified as systematic reviews. The PRISMA flow diagram in **Error! Reference source not found.** shows the screened records and reasons for exclusions. **Supplementary File 2** lists the excluded studies.

### Review characteristics

Eleven systematic reviews and one rapid evidence synthesis, published by NICE as an overview for the Interventional Procedures Advisory Committee (IPAC)<sup>12</sup>, published between 2010 and June 2016 met the inclusion criteria. Table 1 provides a summary of review characteristics. Three of the reviews are presented as best evidence topics<sup>13</sup> by Schulte et al.<sup>14</sup> Girsowicz et al.<sup>15</sup> and de Lesquen et al.<sup>16</sup>

Table 1 Review characteristics

| Review Year Country                                                  | Review aim                                                                                                                                                     | Search strategy                                                                                                                                                                                                                                                                            | Studies and participants                                                                                                                      | PICOS                                                                                                                                                                                             | Risk of bias                                                      | Authors' Conclusions                                                                                                                                                                                                                                                                                                                                      |
|----------------------------------------------------------------------|----------------------------------------------------------------------------------------------------------------------------------------------------------------|--------------------------------------------------------------------------------------------------------------------------------------------------------------------------------------------------------------------------------------------------------------------------------------------|-----------------------------------------------------------------------------------------------------------------------------------------------|---------------------------------------------------------------------------------------------------------------------------------------------------------------------------------------------------|-------------------------------------------------------------------|-----------------------------------------------------------------------------------------------------------------------------------------------------------------------------------------------------------------------------------------------------------------------------------------------------------------------------------------------------------|
| <b>Swart</b> <sup>17</sup><br><b>2016</b><br><b>USA</b>              | To perform a meta-analysis of high quality literature to evaluate both economic and medical benefits of early fixation of rib fractures in severe chest trauma | PubMed, Embase, Medline and Scopus,<br>No search start date<br>Last search date 1 June 2016<br>Search terms defined, No limitations described<br>Evidence of hand searching<br>Eligibility criteria - over 18 years of age and studies comparing operative vs non-operative treatment      | 3 RCT n =123<br>14 Case Control<br>3 Case Series                                                                                              | <b>Population</b><br>Acute flail chest 18 years or old<br><br><b>Intervention</b><br>Operative Fixation<br><br><b>Comparator</b><br>Non-operative<br><br><b>Studies Type</b><br>All study designs | No evidence of quality assessment                                 | Acute ORIF of rib fractures in patients with flail chest injuries results in reduced mortality and medical complications in conjunction with being cost effective intervention.                                                                                                                                                                           |
| <b>Schuermans</b> <sup>18</sup><br><b>2016</b><br><b>Netherlands</b> | Investigate how operative management improves patient care for adults with flail chest.                                                                        | PubMed, Trip database, Google Scholar<br>No search start date<br>Last search date November 2015<br>Search terms defined, No limitations described<br>Evidence of reference checking<br>Eligibility criteria - studies comparing operative vs non-operative treatment, RCT only and English | 3 RCT n = 123                                                                                                                                 | <b>Population</b><br>Acute flail chest<br><br><b>Intervention</b><br>Operative Fixation<br><br><b>Comparator</b><br>Non-operative<br><br><b>Studies Type</b><br>RCTs                              | Quality assessment completed but criteria and explanation unclear | The operative management group showed a significant lower incidence of pneumonia, whereas mortality rate did not differ between treatment groups.                                                                                                                                                                                                         |
| <b>Schulte</b> <sup>14</sup> <b>2016</b><br><b>UK</b>                | In patients with acute flail chest does surgical rib fixation improve outcomes in terms of morbidity and mortality?                                            | OVID MEDLINE®<br>Search start date 1946<br>Last search date January 2016<br>Search terms defined<br>Search strategy description minimal, No limitations described<br>No evidence of reference checking<br>No specific inclusion or exclusion criteria defined.                             | 1 Meta-analysis by separate author<br>1 RCT n=123 (2 further coded as RCT which are non-randomised studies)<br>3 Retrospective cohort studies | <b>Population</b><br>Acute flail chest<br><br><b>Intervention</b><br>Operative Fixation<br><b>Comparator</b><br>Non-operative<br><br><b>Studies Type</b><br>Unclear                               | No evidence of quality assessment                                 | Surgical stabilization of flail chest in thoracic trauma patients has beneficial effects with respect to reduced ventilatory support, shorter intensive care and hospital stay, reduced incidence of pneumonia and septicaemia, decreased risk of chest deformity and an overall reduced mortality when compared with patients who received non-operative |

|                                                                  |                                                                                                                                                                   |                                                                                                                                                                                                                                                                                                                                                                     |                                                                                       |                                                                                                                                                                                                                                                                                                     |                                                                        |                                                                                                                                                                                                                                                                                                                                                         |
|------------------------------------------------------------------|-------------------------------------------------------------------------------------------------------------------------------------------------------------------|---------------------------------------------------------------------------------------------------------------------------------------------------------------------------------------------------------------------------------------------------------------------------------------------------------------------------------------------------------------------|---------------------------------------------------------------------------------------|-----------------------------------------------------------------------------------------------------------------------------------------------------------------------------------------------------------------------------------------------------------------------------------------------------|------------------------------------------------------------------------|---------------------------------------------------------------------------------------------------------------------------------------------------------------------------------------------------------------------------------------------------------------------------------------------------------------------------------------------------------|
|                                                                  |                                                                                                                                                                   |                                                                                                                                                                                                                                                                                                                                                                     |                                                                                       |                                                                                                                                                                                                                                                                                                     |                                                                        | management.                                                                                                                                                                                                                                                                                                                                             |
| <b>Coughlin</b> <sup>19</sup><br><b>2016</b><br><b>UK</b>        | Compare the efficacy of flail chest surgical stabilisation to non-operative management                                                                            | PubMed MEDLINE, Embase, Cochrane Library, clinical trials.gov.<br>No search start date<br>Last search date February 2015<br>Search terms defined, No limitations<br>Evidence of reference checking<br>Eligibility criteria - studies comparing operative vs non-operative treatment in flail chest and RCT only                                                     | 3 RCT n = 123                                                                         | <b>Population</b><br>Traumatic flail chest<br><br><b>Intervention</b><br>Surgical stabilisation of any kind<br><br><b>Comparator</b><br>Patients treated non-operatively by any other means<br><br><b>Studies Type</b><br>RCTs only                                                                 | Clear quality appraisal of the studies                                 | Surgical stabilisation for a traumatic flail chest is associated with significant clinical benefits including rate of pneumonia, length of hospital an ICU stay and duration of mechanical ventilation in this meta-analysis of three relatively small RCTs                                                                                             |
| <b>Unsworth</b> <sup>20</sup><br><b>2015</b><br><b>Australia</b> | To review the treatments for blunt chest trauma and their impact on patient and hospital outcomes. Specifically alludes to surgical stabilization of flail chest. | Cochrane, Medline, EMBASE and CINAHL databases<br>Search limited to 1990 onwards<br>Last search date March 2014<br>Search terms defined. Limited to humans and adults<br>Evidence of reference checking<br>Eligibility criteria - original research, blunt chest trauma, intervention for blunt chest trauma including a comparator and contained measured outcomes | 3 RCT n =123<br>5 Retrospective Case Controls n= 642<br>1 Retrospective cohort n = 21 | <b>Population</b><br>Adult blunt chest trauma<br>Flail chest<br><br><b>Intervention</b><br>Multidisciplinary Intervention (Models of care, management intervention, care practices, care protocols)<br><br><b>Comparator</b><br>Other intervention not specified<br><br><b>Studies Type</b><br>RCTs | Some quality assessment completed but criteria and explanation unclear | Across the literature there were consistent improvements in patients with flail chest and surgical fixation with fewer days of mechanical ventilation, ICU-LOS and cost savings compared to non-operative techniques. Three out of nine studies were randomized controlled trials, and the level of evidence in all studies was primarily fair or good. |
| <b>De Lesquen</b> <sup>16</sup><br><b>2015</b><br><b>France</b>  | In flail chest is open reduction and internal fixation needed?                                                                                                    | Medline and Science Direct<br>Search start date limited to 1994 onwards<br>Last search date January 2014<br>Search Terms defined                                                                                                                                                                                                                                    | 2 Meta-analysis<br>3 RCT n = 123<br>1 prospective cohort n = 60                       | <b>Population</b><br>Blunt chest trauma. Flail chest<br><br><b>Intervention</b>                                                                                                                                                                                                                     | No evidence of quality assessment                                      | For flail chest, early surgical stabilization can be considered in patients who would require mechanical ventilation for >48 h                                                                                                                                                                                                                          |

|                                                                  |                                                                                                                                  |                                                                                                                                                                                                                                                                                                                                                                                                                                                             |                                                  |                                                                                                                                                                                                                                                                                                                                                          |                                        |                                                                                                                                                                                                                                                                                                                                                                                                                                                                                               |
|------------------------------------------------------------------|----------------------------------------------------------------------------------------------------------------------------------|-------------------------------------------------------------------------------------------------------------------------------------------------------------------------------------------------------------------------------------------------------------------------------------------------------------------------------------------------------------------------------------------------------------------------------------------------------------|--------------------------------------------------|----------------------------------------------------------------------------------------------------------------------------------------------------------------------------------------------------------------------------------------------------------------------------------------------------------------------------------------------------------|----------------------------------------|-----------------------------------------------------------------------------------------------------------------------------------------------------------------------------------------------------------------------------------------------------------------------------------------------------------------------------------------------------------------------------------------------------------------------------------------------------------------------------------------------|
|                                                                  |                                                                                                                                  | No evidence of hand searching or reference checking<br>Eligibility criteria - Exclusions of both child and vascular injuries                                                                                                                                                                                                                                                                                                                                | 5 Retrospective cohort n = 238                   | Open reduction and internal fixation<br><br><b>Comparator</b><br>Unclear<br><br><b>Studies Type</b><br>Unclear                                                                                                                                                                                                                                           |                                        |                                                                                                                                                                                                                                                                                                                                                                                                                                                                                               |
| <b>Cataneo<sup>21</sup></b><br><b>2015</b><br><b>Brazil</b>      | To evaluate the effectiveness and safety of surgical stabilization compared with clinical management for people with flail chest | Cochrane Injuries Group Specialised Register, CENTRAL, Medline, Embase, CINAHL, SCI, CPCI-S, Clinical trials.gov, ICTR<br>No search start date<br>Last search Date 12 <sup>th</sup> May 2014.<br>Search terms defined, No limitations<br>Evidence of reference checking<br>Eligibility criteria - RCTs.                                                                                                                                                     | 3 RCTs n = 123                                   | <b>Population</b><br>Adults or children with flail chest<br><b>Intervention</b><br>Surgical stabilisation of any kind<br><br><b>Comparator</b><br>Clinical management included any type of chest wall stabilization without surgical intervention such as straps or bags and any type of ventilatory assistance.<br><br><b>Studies Type</b><br>RCTs only | Clear quality appraisal of the studies | There was no evidence that surgical intervention reduced mortality in people with FC compared with nonsurgical management. There was some evidence that surgical intervention could reduce the risk of developing pneumonia and thoracic deformity; need for tracheostomy; duration of mechanical ventilation, length of ICU stay, and hospital stay; and chronic pain, but the trials to date have been small. There is an urgent need for larger high-quality randomized controlled trials. |
| <b>De Jong<sup>22</sup></b><br><b>2014</b><br><b>Netherlands</b> | To specify indications for rib fracture fixation of non-flail chests                                                             | Medline, Cochrane, Embase<br>Search start date limited to 2010<br>Last search date December 2013<br>Search terms defined, limited to year 2000 onwards.<br>Evidence of reference checking<br>Eligibility criteria - Studies included at least 10 participants who were surgically treated for non-flail chest rib fractures. Reported in English, Dutch, or German. Excluded were case reports, biomechanical studies, animal studies, and expert opinions. | 1 Case Control n = 60<br>2 Cohort studies n = 47 | <b>Population</b><br>Traumatic non-flail chest<br><br><b>Intervention</b><br>Surgical treatment of non-flail chest<br><br><b>Comparator</b><br>Unclear<br><br><b>Studies Type</b><br>All studies with at least 10 surgically treated                                                                                                                     | No evidence of quality assessment      | The evidence for surgical treatment of non-flail chest rib fractures is limited                                                                                                                                                                                                                                                                                                                                                                                                               |

1  
2  
3  
4  
5  
6  
7  
8  
9  
10  
11  
12  
13  
14  
15  
16  
17  
18  
19  
20  
21  
22  
23  
24  
25  
26  
27  
28  
29  
30  
31  
32  
33  
34  
35  
36  
37  
38  
39  
40  
41  
42  
43  
44  
45  
46  
47

|                                                                        |                                                                                                                                                                                                      |                                                                                                                                                                                                                                                                                                                                                                                                          |                                                                                                                 |                                                                                                                                                                                                                                                                             |                                                                                            |                                                                                                                                                                                                                                                                                                                                                                                                                                                 |
|------------------------------------------------------------------------|------------------------------------------------------------------------------------------------------------------------------------------------------------------------------------------------------|----------------------------------------------------------------------------------------------------------------------------------------------------------------------------------------------------------------------------------------------------------------------------------------------------------------------------------------------------------------------------------------------------------|-----------------------------------------------------------------------------------------------------------------|-----------------------------------------------------------------------------------------------------------------------------------------------------------------------------------------------------------------------------------------------------------------------------|--------------------------------------------------------------------------------------------|-------------------------------------------------------------------------------------------------------------------------------------------------------------------------------------------------------------------------------------------------------------------------------------------------------------------------------------------------------------------------------------------------------------------------------------------------|
| <p><b>Slobogean</b><sup>23</sup><br/><b>2013</b><br/><b>Canada</b></p> | <p>Compare the critical care outcomes of surgical fixation to non-operative management in patients with flail chest injuries</p>                                                                     | <p>Medline, Embase, Cochrane Database of Systematic Reviews (CDSR), and the Cochrane Central, Register of Controlled Trials (CENTRAL)<br/>No search start date<br/>Last search date May 2011<br/>No limitations<br/>No evidence of reference checking or hand searching<br/>Eligibility criteria - Comparator studies with more than 10 cases.</p>                                                       | <p>2 RCT<br/>1 case control n= 60<br/>8 Cohort n = 676</p>                                                      | <p><b>Population</b><br/>Acute flail chest</p> <p><b>Intervention</b><br/>Operative Fixation</p> <p><b>Comparator</b><br/>Conservative management</p> <p><b>Studies Type</b><br/>RCTs</p>                                                                                   | <p>No evidence of quality assessment</p>                                                   | <p>Improved outcomes of multiple critical care outcomes with narrow confidence intervals but based on small retrospective studies. Suggests prospective RCT to overcome potential biases</p>                                                                                                                                                                                                                                                    |
| <p><b>Leinicke</b><sup>24</sup><br/><b>2013</b><br/><b>USA</b></p>     | <p>Comparing operative to non-operative therapy in adult flail chest patients</p>                                                                                                                    | <p>MEDLINE (1966-2012), Embase (1947-2012), Scopus (all years), Cochrane Databases and ClinicalTrials.gov<br/>Last search date February 2012<br/>Search terms defined, limited to English and human studies<br/>Evidence of reference checking<br/>Eligibility criteria - studies comparing operative vs non-operative treatment in patients with flail chest. Excluded case reports and case series</p> | <p>2 RCT<br/>3 Case Control n=158<br/>4 Cohort n = 303</p>                                                      | <p><b>Population</b><br/>Flail chest</p> <p><b>Intervention</b><br/>Operative Fixation</p> <p><b>Comparator</b><br/>Non-Operative</p> <p><b>Studies Type</b><br/>RCTs, cohort, and case-control trials</p>                                                                  | <p>Clear quality appraisal of the studies</p>                                              | <p>As compared to non-operative therapy, operative fixation of FC is associated with reductions in DMV, LOS, mortality, and complications associated with prolonged MV. These findings support the need for an adequately powered clinical study to further define the role of this intervention</p>                                                                                                                                            |
| <p><b>Girsowicz</b><sup>15</sup><br/><b>2012</b><br/><b>France</b></p> | <p>In patients over 45 years old with isolated, movable and painful rib fractures without true flail chest is surgical stabilization superior to non-operative management in improving outcomes?</p> | <p>OVID Medline 1948 –2011<br/>Last search date June 2011<br/>Search terms defined, limited to Human and English language<br/>Evidence of reference checking<br/>Eligibility criteria – excluded flail chest but inclusions not well described</p>                                                                                                                                                       | <p>4 Retrospective cohort n= 107<br/>1 non-systematic Review<br/>1 Case control = 30<br/>2 Case report n= 2</p> | <p><b>Population</b><br/>Over 45 years old with isolated, movable and painful Rib fractures without true flail chest</p> <p><b>Intervention</b><br/>surgical stabilization</p> <p><b>Comparator</b><br/>non-operative management</p> <p><b>Studies Type</b><br/>Unclear</p> | <p>Some comments on strengths and weaknesses but no quality or risk of bias assessment</p> | <p>Surgical stabilization in the management of isolated multiple non-flail and painful rib fractures improved outcomes (pain, respiratory function, quality of life and reduced socio-professional disability) Studies provided a low level of evidence (small studies with few numbers of patients and short-term follow-up or case reports). Large prospective controlled trials are thus necessary to confirm these encouraging results.</p> |

|                                                                                                                                                                                                                             |                                                                                                               |                                                                                                                                                                                                                                                                                                                                                                                                                    |                                                                                    |                                                                                                                                                                                                                                                                                                                                                                                                                   |                                           |                                                                                       |
|-----------------------------------------------------------------------------------------------------------------------------------------------------------------------------------------------------------------------------|---------------------------------------------------------------------------------------------------------------|--------------------------------------------------------------------------------------------------------------------------------------------------------------------------------------------------------------------------------------------------------------------------------------------------------------------------------------------------------------------------------------------------------------------|------------------------------------------------------------------------------------|-------------------------------------------------------------------------------------------------------------------------------------------------------------------------------------------------------------------------------------------------------------------------------------------------------------------------------------------------------------------------------------------------------------------|-------------------------------------------|---------------------------------------------------------------------------------------|
| <p><b>NICE Evidence</b> <sup>12</sup><br/><b>2010</b><br/><b>UK</b></p>                                                                                                                                                     | <p>To make recommendations about the safety and efficacy of surgical rib fracture fixation in flail chest</p> | <p>MEDLINE, PREMEDLINE, EMBASE, Cochrane Library<br/>No search start date<br/>Last search date May 2010<br/>Search terms defined<br/>No limitations<br/>No evidence of reference checking but other searches performed<br/>Eligibility criteria – clinical studies of patients with flail chest operated with metal rib reinforcements and published in English.<br/>Excluded conference abstracts and reviews</p> | <p>1 RCT<br/>2 non randomized studies<br/>4 case series<br/>Total 225 patients</p> | <p><b>Population</b><br/>Flail chest</p> <p><b>Intervention</b><br/>Insertion of metal rib reinforcements.</p> <p><b>Comparator</b><br/>Unclear</p> <p><b>Studies Type</b><br/>Clinical studies were included.<br/>Abstracts were excluded where no clinical outcomes were reported, or where the paper was a review, editorial, or a laboratory or animal study.<br/>Conference abstracts were also excluded</p> | <p>No evidence of quality assessments</p> | <p>Surgical rib fracture fixation should be consider in patients with flail chest</p> |
| <p>RCT = Randomised controlled trial, ORIF = Open reduction internal fixation, ICU = Intensive care unit, LOS = Length of stay, FC = Flail chest, MV = Mechanical ventilation, DMV = duration of mechanical ventilation</p> |                                                                                                               |                                                                                                                                                                                                                                                                                                                                                                                                                    |                                                                                    |                                                                                                                                                                                                                                                                                                                                                                                                                   |                                           |                                                                                       |



1  
2  
3  
4  
5  
6  
7  
8  
9  
10  
11  
12  
13  
14  
15  
16  
17  
18  
19  
20  
21  
22  
23  
24  
25  
26  
27  
28  
29  
30  
31  
32  
33  
34  
35  
36  
37  
38  
39  
40  
41  
42  
43  
44  
45  
46  
47  
48  
49  
50  
51  
52  
53  
54  
55  
56  
57  
58  
59  
60

2 Nine reviews<sup>12 14 16-19 21 23 24</sup> evaluated the effectiveness of internal surgical fixation in  
3 patients with flail chest, two reviews included patients with multiple rib fractures<sup>15 22</sup> and  
4 one review included all rib fractures but only reported outcomes for flail chest.<sup>20</sup> Although  
5 single rib fractures were included in the protocol none of the primary studies assess  
6 fixation of a single rib fracture. The inclusion criteria specified only adult patients in ten  
7 reviews, with Girsowicz et al.<sup>15</sup> specifically looked at patients over the age of 45 years old.  
8 Although studies of children were eligible in the review by Cataneo et al.<sup>21</sup>, none of the  
9 primary studies in the review included any participants less than 18 years of age. Studies  
10 specified all types of surgical fixation and did not specifically exclude external fixation  
11 however, no primary study had external fixation in their intervention or comparator groups.

12 Three reviews<sup>18 19 21</sup> included only randomised evidence and eight included other study  
13 designs<sup>12 14-17 22-24</sup> (two systematic reviews, 19 non-randomised studies, 11 case series  
14 and two case reports) (Table 2). As would be expected, there was overlap across the  
15 review in the included primary studies The total number of patients who had internal  
16 fixation in primary studies (excluding duplicate studies) was 1036 and there were 1187  
17 controls.

Table 2 Primary studies included in each review and the number of included patients

| Review                   | Studies                |                         |                      |                  |                |              |            |              |                     |                     |                     |             |                     |                         |                |                       |                     |                       |                        |                     |                    |                  |                 |                 |                 |                |               |                |                          |                 |                       |                         |                 |                 |                 |                           |                     |   |   |   |
|--------------------------|------------------------|-------------------------|----------------------|------------------|----------------|--------------|------------|--------------|---------------------|---------------------|---------------------|-------------|---------------------|-------------------------|----------------|-----------------------|---------------------|-----------------------|------------------------|---------------------|--------------------|------------------|-----------------|-----------------|-----------------|----------------|---------------|----------------|--------------------------|-----------------|-----------------------|-------------------------|-----------------|-----------------|-----------------|---------------------------|---------------------|---|---|---|
|                          | Leinicke et al. (2013) | Slobogean et al. (2013) | Tanaka (2001)        | Granetzny (2005) | Marasco (2013) | Paris (1975) | Kim (1981) | Karev (1997) | Ahmed et al. (1995) | Voggenreiter (1998) | Balci et al. (2004) | Teng (2009) | Nirula et al (2006) | Althausen et al. (2011) | De Moya (2011) | Granhed et al. (2014) | Doben et al. (2014) | Jayle et al. (2015)   | Pieracci et al. (2015) | Zhang et al. (2015) | Wada et al. (2015) | Xu et al. (2015) | Majercik (2015) | Defreest (2016) | Ohresser (1972) | Helberg (1981) | Menard (1983) | Moulton (1997) | Cacchione et al., (2000) | Lardonis (2001) | Kerr -Valentic (2003) | Gasparri et al., (2003) | Borrelly (2005) | Campbell (2009) | Mayberry (2009) | Richardson et al., (2007) | Moreno De La (2010) |   |   |   |
| Intervention patients    |                        |                         | 18                   | 20               | 23             | 18           | 18         | 40           | 26                  | 20                  | 27                  | 32          | 30                  | 22                      | 16             | 60                    | 10                  | 10                    | 35                     | 24                  | 84                 | 17               | 38              | 41              | 14              | 10             | 18            | 23             | 1                        | 66              | 40                    | 1                       | 127             | 32              | 46              | 7                         | 22                  |   |   |   |
| Control Patients         |                        |                         | 19                   | 20               | 23             | 11           | 45         | 93           | 38                  | 22                  | 37                  | 28          | 30                  | 28                      | 32             | 153                   | 11                  | 10                    | 35                     | 15                  | 420                | 15               | 57              | 45              | -               | -              | -             | -              | -                        | -               | -                     | -                       | -               | -               | -               | -                         | -                   | - | - |   |
| Swart <sup>17</sup>      |                        |                         | •                    | •                | •              |              | •          | •            | •                   | •                   | •                   | •           | •                   | •                       | •              | •                     | •                   | •                     | •                      | •                   | •                  | •                | •               | •               |                 |                |               |                |                          |                 |                       |                         |                 |                 |                 |                           |                     |   |   |   |
| Schuurmans <sup>18</sup> |                        |                         | •                    | •                | •              |              |            |              |                     |                     |                     |             |                     |                         |                |                       |                     |                       |                        |                     |                    |                  |                 |                 |                 |                |               |                |                          |                 |                       |                         |                 |                 |                 |                           |                     |   |   |   |
| Schulte <sup>14</sup>    |                        | •                       |                      |                  |                |              |            |              |                     |                     |                     |             |                     | •                       | •              | •                     | •                   | •                     | •                      | •                   | •                  | •                | •               |                 |                 |                |               |                |                          |                 |                       |                         |                 |                 |                 |                           |                     |   |   |   |
| Coughlin <sup>19</sup>   |                        |                         | •                    | •                | •              |              |            |              |                     |                     |                     |             |                     |                         |                |                       |                     |                       |                        |                     |                    |                  |                 |                 |                 |                |               |                |                          |                 |                       |                         |                 |                 |                 |                           |                     |   |   |   |
| Unsworth <sup>20</sup>   |                        |                         | •                    | •                | •              |              |            |              | •                   | •                   |                     |             | •                   | •                       | •              |                       | •                   |                       |                        |                     |                    |                  |                 |                 |                 |                |               |                |                          |                 |                       |                         |                 |                 |                 |                           |                     |   |   |   |
| de Lesquen <sup>16</sup> | •                      | •                       | •                    | •                | •              |              |            | •            | •                   | •                   | •                   |             | •                   | •                       |                |                       |                     |                       |                        |                     |                    |                  |                 |                 |                 |                |               |                |                          |                 |                       |                         |                 |                 |                 |                           |                     |   |   |   |
| Cataneo <sup>21</sup>    |                        |                         |                      |                  |                |              |            |              |                     |                     |                     |             |                     |                         |                |                       |                     |                       |                        |                     |                    |                  |                 |                 |                 |                |               |                |                          |                 |                       |                         |                 |                 |                 |                           |                     |   |   |   |
| de Jong <sup>22</sup>    |                        |                         |                      |                  |                |              |            |              |                     |                     |                     |             | •                   |                         |                |                       |                     |                       |                        |                     |                    |                  |                 |                 |                 |                |               |                |                          |                 |                       |                         |                 |                 |                 | •                         | •                   |   |   |   |
| Slobogean <sup>23</sup>  |                        |                         | •                    | •                |                |              | •          | •            | •                   | •                   | •                   | •           | •                   |                         |                |                       |                     |                       |                        |                     |                    |                  |                 |                 |                 | •              |               |                |                          |                 |                       |                         |                 | •               |                 | •                         |                     |   |   |   |
| Leinicke <sup>24</sup>   |                        |                         | •                    | •                |                |              |            | •            |                     | •                   | •                   |             | •                   | •                       | •              |                       |                     |                       |                        |                     |                    |                  |                 |                 |                 |                |               |                |                          |                 |                       |                         |                 |                 |                 |                           |                     |   |   |   |
| Girsowicz <sup>15</sup>  |                        |                         |                      |                  |                |              |            |              |                     |                     |                     |             | •                   |                         |                |                       |                     |                       |                        |                     |                    |                  |                 |                 |                 |                |               |                | •                        |                 | •                     | •                       |                 |                 | •               | •                         | •                   | • | • | • |
| NICE <sup>12</sup>       |                        |                         | •                    |                  |                | •            |            |              |                     | •                   |                     |             |                     |                         |                |                       |                     |                       |                        |                     |                    |                  |                 |                 |                 |                | •             |                | •                        | •               | •                     |                         |                 |                 |                 |                           |                     |   |   |   |
|                          | SR                     | RCT                     | Non Randomised Study |                  |                |              |            |              |                     |                     |                     |             |                     |                         |                |                       |                     | Case Series or Report |                        |                     |                    |                  |                 |                 |                 |                |               |                |                          |                 |                       |                         |                 |                 |                 |                           |                     |   |   |   |

1 The rapid evidence synthesis by NICE<sup>12</sup> was the first review published in 2010. It included  
2 seven primary studies including one RCT published in 2001.<sup>25</sup> Another trial<sup>26</sup> published in  
3 2005 was not included in the review despite it appearing to meet the inclusion criteria.  
4  
5 Search terms may have missed this study as it was not reported in the excluded studies  
6 list. A review in 2015 by Cataneo et al.<sup>21</sup> was the first meta-analysis published and  
7  
8 included three RCTs.<sup>25-27</sup> Two further systematic reviews published since then<sup>18 19</sup> have  
9  
10 identified the same three RCTs and repeated the same meta-analyses. The research  
11  
12 question and eligibility criteria in both of the reviews are almost identical to the review by  
13  
14 Cataneo et al.<sup>21</sup> and they were both published in 2016. The best evidence topic review by  
15  
16 Schulte et al.<sup>14</sup> included the most recent RCT<sup>27</sup> however, it was unclear why the two  
17  
18 earlier RCTs<sup>25 26</sup> were not included as there were no study date restrictions, and there was  
19  
20 no excluded studies list to check this.  
21  
22  
23  
24

### 25 **Risk of bias**

26  
27 The ROBIS tool identified seven studies were rated as low risk of bias,<sup>12 16 18 19 21 23 24</sup> three  
28  
29 as unclear<sup>15 17 22</sup> and two as high.<sup>14 20</sup> The two reviews rated as having high risk of bias  
30  
31 were due to lack of detail in the search strategy, no attempts to minimise errors of data  
32  
33 extraction by double checking and no quality assessment of included studies.  
34  
35

36 The only review for which a protocol was identified was the Cochrane review undertaken  
37  
38 by Cataneo et al.<sup>21</sup> A search of PROSPERO identified no registered protocols for any of  
39  
40 the other included reviews, Table 3 contains a summary of the risk of bias assessment for  
41  
42 each review.  
43  
44  
45  
46  
47  
48  
49  
50  
51  
52  
53  
54  
55  
56  
57  
58  
59  
60

**Table 3 Risk of bias using ROBIS tool**

| Studies                           | Study eligibility criteria | Identification and selection of studies | Data collection and study appraisal | Synthesis and findings | Risk of bias in the review |
|-----------------------------------|----------------------------|-----------------------------------------|-------------------------------------|------------------------|----------------------------|
| Swart 2016 <sup>17</sup>          | Low                        | Unclear                                 | High                                | High                   | Unclear                    |
| Schuurmans 2016 <sup>18</sup>     | Low                        | Unclear                                 | High                                | Low                    | Low                        |
| Schulte, 2016 <sup>14</sup>       | High                       | High                                    | High                                | High                   | High                       |
| Coughlin 2016 <sup>19</sup>       | Low                        | Low                                     | Low                                 | Low                    | Low                        |
| Unsworth 2015 <sup>20</sup>       | Low                        | Low                                     | Unclear                             | Unclear                | High                       |
| de Lesquen, 2015 <sup>16</sup>    | Unclear                    | High                                    | Unclear                             | Unclear                | Low                        |
| Cataneo, 2015 <sup>21</sup>       | Low                        | Low                                     | Low                                 | Low                    | Low                        |
| de Jong, 2014 <sup>22</sup>       | High                       | Unclear                                 | High                                | High                   | Unclear                    |
| Slobogean, 2013 <sup>23</sup>     | Low                        | Low                                     | High                                | Low                    | Low                        |
| Leinicke, 2013 <sup>24</sup>      | Low                        | Low                                     | Low                                 | Low                    | Low                        |
| Girsowicz, 2012 <sup>15</sup>     | High                       | High                                    | High                                | High                   | Unclear                    |
| NICE Evidence, 2010 <sup>12</sup> | Low                        | Unclear                                 | Unclear                             | Low                    | Low                        |

### Outcome evaluation

All reviews undertook a narrative synthesis with six reviews including a meta-analysis.<sup>17-19</sup>

<sup>21 23 24</sup> Table 4 summarises the results of the meta-analysis by outcome for flail chest.

Table 5 details the results from the systematic reviews for flail chest which undertook a narrative synthesis and Table 6 for narrative synthesis related to multiple rib fractures.

Across all the reviews eighteen outcomes were reported. Eleven outcomes were reported by more than one review, seven further outcomes were reported by only a single review.

### Primary outcome - Length of mechanical ventilation (days)

#### Flail Chest

Ten systematic reviews reported length of mechanical ventilation; six of these reported a meta-analysis<sup>17-19 21 23 24</sup> with four<sup>17-19 21</sup> reporting a meta-analysis on the same three RCTs.<sup>25-27</sup>

There was substantial variation across the reviews in the pooled estimates for this outcome, related to pooling different sets of studies. The largest reduction in duration of mechanical ventilation with surgical fixation compared to non-operative management was reported by Slobogean et al.<sup>23</sup> who pooled two RCTs<sup>25 26</sup> and six non-randomised studies<sup>28-33</sup> (MD (fixed) -7.5 days, 95% CI [-9.9,-5.5]); (Table 4). The mean difference was 3 days

1 more than the pooled estimates by Leinicke et al.<sup>24</sup> and Swart et al.<sup>17</sup>. Leinicke et al.<sup>24</sup>  
2 pooled six non-randomised studies<sup>5 28 29 31 33 34</sup> and two RCTs<sup>25 26</sup> and reported a  
3 statistically significant reduction of -4.52 days, 95% CI [-5.54, -3.50]; Swart et al.<sup>17</sup> pooled  
4 three RCTs<sup>25-27</sup> and 15 non-randomised studies<sup>5 28 29 31-42</sup> and reported a statistically  
5 significant reduction of -4.57 days, SD (0.59).  
6  
7  
8  
9  
10  
11  
12  
13  
14  
15  
16  
17  
18  
19  
20  
21  
22  
23  
24  
25  
26  
27  
28  
29  
30  
31  
32  
33  
34  
35  
36  
37  
38  
39  
40  
41  
42  
43  
44  
45  
46  
47  
48  
49  
50  
51  
52  
53  
54  
55  
56  
57  
58  
59  
60

For peer review only

Table 4 Results of individual reviews that report a meta-analysis for flail chest

| Total length of invasive mechanical ventilation (Days) |                                              |             |    |                          |                         |                |
|--------------------------------------------------------|----------------------------------------------|-------------|----|--------------------------|-------------------------|----------------|
| Studies reporting outcome                              | N of studies (n of participants in analysis) | Study Types |    | Details of meta-analysis | Results                 | I <sup>2</sup> |
|                                                        |                                              | RCT         | NR |                          |                         |                |
| Cataneo <sup>21</sup>                                  | 3 (123)                                      | 3           | 0  | MD [IV, Fixed, 95% CI]   | Results not pooled      | -              |
| Coughlin <sup>19</sup>                                 | 3 (123)                                      | 3           | 0  | MD [IV, Random, 95% CI]  | -6.30 [-12.16, -0.43]   | 95             |
| Leinicke <sup>24</sup>                                 | 8 (474)                                      | 2           | 6  | MD [IV, Random 95% CI]   | -4.52 [-5.54, -3.50]    | 48.6           |
| Schuurmans <sup>18</sup>                               | 3 (123)                                      | 3           | 0  | MD [IV, Random, 95% CI]  | -6.53 [-11.88, -1.18]   | 93             |
| Slobogean <sup>23</sup>                                | 8 Studies (563)                              | 2           | 6  | MD [IV, Fixed, 95% CI]   | -7.5 [-9.9, -5.0]       | 48             |
| Swart <sup>17</sup>                                    | 18 Studies (1150)                            | 3           | 15 | MD [IV, Random, SD]      | -4.57 [0.59]            | 83             |
| Mortality (frequency)                                  |                                              |             |    |                          |                         |                |
| Cataneo <sup>21</sup>                                  | 3 (123)                                      | 3           | 0  | RR [M-H, Fixed, 95% CI]  | 0.56 [0.13, 2.42]       | 0              |
| Coughlin <sup>19</sup>                                 | 2 (86)                                       | 2           | 0  | RR [M-H Random 95% CI]   | 0.57 [0.13, 2.52]       | 0              |
| Leinicke <sup>24</sup>                                 | 5 (343)                                      | 1           | 0  | RR [95% CI]              | 0.43 [0.28, 0.69]       | 0              |
| Schuurmans <sup>18</sup>                               | 2 (86)                                       | 2           | 0  | RR [M-H, Fixed, 95% CI]  | 0.56 [0.13, 2.42]       | 0              |
| Slobogean <sup>23</sup>                                | 7 (582)                                      | 2           | 5  | OR [M-H, Fixed, 95% CI]  | 0.31 [0.20, 0.48]       | -              |
| Slobogean <sup>23</sup>                                | 7 (582)                                      | 2           | 5  | RR [M-H, Fixed, 95% CI]  | 0.19 [0.13, 0.26]       | 0              |
| Swart <sup>17</sup>                                    | 13(1263)                                     | 3           | 10 | RR [M-H, Random, SD]     | 0.44 [0.09]             | 0              |
| Total length of stay in intensive care unit (Days)     |                                              |             |    |                          |                         |                |
| Cataneo <sup>21</sup>                                  | 2 (77)                                       | 2           | 0  | MD [IV, Fixed, 95% CI]   | Results not pooled      | -              |
| Coughlin <sup>19</sup>                                 | 3 (123)                                      | 3           | 0  | MD [IV, Random, 95% CI]  | -6.46 [-9.73, -3.19]    | 35             |
| Leinicke <sup>24</sup>                                 | 5 (235)                                      | 2           | 3  | MD [IV, Random, 95% CI]  | -3.4 [-6.01, -0.80]     | 74.9           |
| Schuurmans <sup>18</sup>                               | 3 (123)                                      | 3           | 0  | MD [IV, Fixed, 95% CI]   | -5.18 [-6.17, -4.19]    | 40             |
| Slobogean <sup>23</sup>                                | 4 (261)                                      | 2           | 2  | MD [IV, Fixed, 95% CI]   | -4.8 [-7.9, -1.6]       | 0.1            |
| Swart <sup>17</sup>                                    | 14 (840)                                     | 3           | 11 | MD [IV, Random, SD]      | -3.25 [1.29]            | 91             |
| Total length of stay in hospital (Days)                |                                              |             |    |                          |                         |                |
| Coughlin <sup>19</sup>                                 | 2 (86)                                       | 2           | 0  | MD [IV, Random, 95% CI]  | -11.39 [-12.39, -10.38] | 0              |
| Leinicke <sup>24</sup>                                 | 5 (262)                                      | 1           | 4  | MD [IV, Random 95% CI]   | -3.83 [-7.12, -0.54]    | 68.9           |
| Schuurmans <sup>18</sup>                               | 2 (86)                                       | 2           | 0  | MD [IV, Fixed, 95% CI]   | -11.39 [-12.39, -10.38] | 0              |
| Slobogean <sup>23</sup>                                | 4 (404)                                      | 1           | 3  | MD [IV, Fixed, 95% CI]   | -4.0 [-7.4, -0.7]       | 33             |
| Swart <sup>17</sup>                                    | 11(438)                                      | 1           | 10 | MD [IV, Random, SD]      | -4.48 [1.98]            | 89             |

1  
2  
3  
4  
5  
6  
7  
8  
9  
10  
11  
12  
13  
14  
15  
16  
17  
18  
19  
20  
21  
22  
23  
24  
25  
26  
27  
28  
29  
30  
31  
32  
33  
34  
35  
36  
37  
38  
39  
40  
41  
42  
43  
44  
45  
46  
47

| <b>Pneumonia (frequency)</b>                 |           |   |    |                                 |                               |              |
|----------------------------------------------|-----------|---|----|---------------------------------|-------------------------------|--------------|
| Cataneo <sup>21</sup>                        | 3 (123)   | 3 | 0  | RR [M-H Random 95% CI]          | 0.36 [0.15, 0.85]             | 66           |
| Coughlin <sup>19</sup>                       | 3 (123)   | 3 | 0  | RR [M-H Random 95% CI]          | 0.36 [0.15, 0.85]             | 66           |
| Leinicke <sup>24</sup>                       | 4 (260)   | 1 | 3  | RR [95% CI]                     | 0.43 [0.28, 0.69]             | 31           |
| Schuurmans <sup>18</sup>                     | 2 (83)    | 2 | 0  | RR [M-H, Fixed, 95% CI]         | 0.45 [0.29, 0.7]              | 74           |
| Slobogean <sup>23</sup>                      | 8 (816)   | 2 | 6  | OR [M-H, Fixed, 95% CI]         | 0.18 [0.11, 0.32]             | 4            |
| Slobogean <sup>23</sup>                      | 8 (816)   | 2 | 6  | RR [M-H, Fixed, 95% CI]         | 0.31 [0.21, 0.41]             | 4            |
| Swart <sup>17</sup>                          | 15 (1005) | 3 | 12 | RR [M-H, Random, SD]            | 0.59 [0.10]                   | 55           |
| <b>Tracheostomy (frequency)</b>              |           |   |    |                                 |                               |              |
| Cataneo <sup>21</sup>                        | 2 (83)    | 2 | 0  | RR [M-H Random 95% CI]          | 0.38 [0.14, 1.02]             | 64           |
| Leinicke <sup>24</sup>                       | 4 (215)   | 1 | 3  | RR [95% CI]                     | 0.25 [0.13, 0.47]             | 0            |
| Schuurmans <sup>18</sup>                     | 2 (83)    | 2 | 0  | RR [M-H, Fixed, 95% CI]         | 0.4 [0.2, 0.7]                | Not reported |
| Slobogean <sup>23</sup>                      | 3 (165)   | 1 | 2  | OR [M-H, Fixed, 95% CI]         | 0.12 [0.04, 0.32]             | 0            |
| Slobogean <sup>23</sup>                      | 3 (165)   | 1 | 2  | RR [M-H, Fixed, 95% CI]         | 0.34 [0.10, 0.57]             | 0            |
| Swart <sup>17</sup>                          | 11 (975)  | 2 | 9  | RR [M-H, Random, SD]            | 0.52 [0.07]                   | 42           |
| <b>Sepsis (frequency)</b>                    |           |   |    |                                 |                               |              |
| Slobogean <sup>23</sup>                      | 4 (345)   | 0 | 4  | OR [M-H, Fixed, 95% CI]         | 0.36 [0.19, 0.71]             | 0            |
| Slobogean <sup>23</sup>                      | 4 (345)   | 0 | 4  | RR [M-H, Fixed, 95% CI]         | 0.14 [0.56, 0.23]             | 0            |
| <b>Spirometry (percentage of predicated)</b> |           |   |    |                                 |                               |              |
| Coughlin <sup>19</sup>                       | -         | - | -  | -                               | -                             | -            |
| FVC                                          | 2 (74)    | 2 | 0  | MD [IV, Random, 95% CI] p-value | 1.53 [-13.49, 16.55] p = 0.84 | Not reported |
| FEV1                                         | 2 (74)    | 2 | 0  | MD [IV, Random, 95% CI] p-value | -0.42 [-4.83, 3.98] p = 0.85  | Not reported |
| TLC                                          | 2 (74)    | 2 | 0  | MD [IV, Random, 95% CI] p-value | 3.69 [-3.08, 10.46] p = 0.29  | Not reported |
| PEFR                                         | 2 (74)    | 2 | 0  | MD [IV, Random, 95% CI] p-value | 0.38 [-0.76, 1.53] p = 0.51   | Not reported |
| <b>Chest deformity (frequency)</b>           |           |   |    |                                 |                               |              |
| Cataneo <sup>21</sup>                        | 2 (86)    | 2 | 0  | RR [M-H, Fixed, 95% CI]         | 0.13 [0.03, 0.67]             | 0            |
| Slobogean <sup>23</sup>                      | 4 (228)   | 1 | 3  | OR [M-H, Fixed, 95% CI]         | 0.11 [0.02, 0.60]             | 2.1          |
| Slobogean <sup>23</sup>                      | 4 (228)   | 1 | 3  | RR [M-H, Fixed, 95% CI]         | 0.30 [0.00, 0.60]             | 2.1          |
| <b>Dyspnoea (frequency)</b>                  |           |   |    |                                 |                               |              |
| Slobogean <sup>23</sup>                      | 3 (135)   | 1 | 2  | OR [M-H, Fixed, 95% CI]         | 0.40 [0.16, 1.01]             | 0            |

|                                                                                                                                                                                                                                                                                                                                                |         |   |   |                         |                    |   |
|------------------------------------------------------------------------------------------------------------------------------------------------------------------------------------------------------------------------------------------------------------------------------------------------------------------------------------------------|---------|---|---|-------------------------|--------------------|---|
| Slobogean <sup>23</sup>                                                                                                                                                                                                                                                                                                                        | 3 (135) | 1 | 2 | RR [M-H, Fixed, 95% CI] | 0.15 [0.09, 0.39]  | 0 |
| <b>Chest pain (frequency)</b>                                                                                                                                                                                                                                                                                                                  |         |   |   |                         |                    |   |
| Slobogean <sup>23</sup>                                                                                                                                                                                                                                                                                                                        | 2(71)   | 1 | 1 | OR [M-H, Fixed, 95% CI] | 0.40 [0.01, 12.60] | 0 |
| Slobogean <sup>23</sup>                                                                                                                                                                                                                                                                                                                        | 2(71)   | 1 | 1 | RR [M-H, Fixed, 95% CI] | 0.18 [0.46, 0.83]  | 0 |
| RCT= Randomised controlled trial, NR = Non randomised study, RR = Risk ratio, OR = Odds ratio, MD = Mean difference, SD = Standard deviation, CI = Confidence interval, IV - Inverse variance, M-H - Mantel-Haenszel, FVC = Force vital capacity, FEV1 = Forced expiratory volume, TLC = Total lung capacity, PEFR = Peak expiratory flow rate |         |   |   |                         |                    |   |

For peer review only



1  
2  
3 There were differences in the data reported for the four meta-analyses of mechanical  
4 ventilation<sup>17-19 21</sup> that included the same three RCTs. Schuurmans et al.<sup>18</sup> extracted median  
5 duration of mechanical ventilation post randomisation from the Marasco et al. RCT<sup>27</sup>  
6  
7 (operative, median 9 days (SD 3.8) Vs. non-operative, median 10.8 days (SD 5.9)) and  
8  
9 pooled this in the meta-analysis along with studies that measured mean total time on  
10  
11 ventilation. In contrast, Coughlin et al.<sup>19</sup>, Cataneo et al.<sup>21</sup> and Swart et al.<sup>17</sup> report the total  
12  
13 mean time on mechanical ventilation, which they state, was obtained directly from the  
14  
15 authors (operative, mean 6.32 (SD 3.46) Vs. non operative, mean 7.54 (SD 5.42)). The  
16  
17 pooled estimates using the median and mean data from the Marasco RCT<sup>27</sup> are broadly  
18  
19 similar and show a reduction in mechanical ventilation of more than 6 days, though the  
20  
21 difference is slightly larger in the Schuurman et al.<sup>18</sup> review (MD -6.53 days, 95% CI [-11.88,  
22  
23 -1.18]) than the Cataneo et al.<sup>21</sup>, Coughlin et al.<sup>19</sup> and Swart et al.<sup>17</sup> reviews (MD -6.30 days,  
24  
25 95% CI [-12.16, -0.43]).  
26  
27

28  
29 Variations also arose in relation to the extraction of data from the RCT by Granetzny et al.<sup>26</sup>  
30  
31 who did not publish standard deviations for the outcome length of mechanical ventilation  
32  
33 within their publication. Slightly different SD values are found in all six meta-analyses<sup>17-19 21 23</sup>  
34  
35 <sup>24</sup> which may have arisen from different methods of imputation and all give slightly different  
36  
37 estimates.  
38  
39

40 Substantial heterogeneity was seen in all meta-analyses reporting this outcome<sup>18 19 23 24</sup> ( $I^2 =$   
41  
42 48% to 95%). Cataneo et al.<sup>21</sup> did not pool the data from the three RCTs included for this  
43  
44 outcome due to the substantial statistical heterogeneity ( $I^2 = 95%$ ) but reported the individual  
45  
46 study effect estimates from all three RCTs. A statistical difference is reported in two RCTs<sup>25</sup>  
47  
48 <sup>26</sup> (-7.50 days, 95% CI [-11.18, -3.82] and -10.00 days, 95% CI [-10.37, -9.63]) and a non-  
49  
50 statistical difference in the other RCT<sup>27</sup> (-1.21 days 95% CI [-3.84, 1.42]) in favour of surgical  
51  
52 fixation compared to non-operative management.  
53  
54  
55  
56  
57  
58  
59  
60

1  
2  
3 Narrative synthesis from two reviews concluded that fixation reduces the length of  
4 mechanical ventilation compared to non-operative management.<sup>16 20</sup> (Table 5)  
5  
6  
7  
8  
9  
10  
11  
12  
13  
14  
15  
16  
17  
18  
19  
20  
21  
22  
23  
24  
25  
26  
27  
28  
29  
30  
31  
32  
33  
34  
35  
36  
37  
38  
39  
40  
41  
42  
43  
44  
45  
46  
47  
48  
49  
50  
51  
52  
53  
54  
55  
56  
57  
58  
59  
60

For peer review only

1  
2  
3  
4  
5  
6  
7  
8  
9  
10  
11  
12  
13  
14  
15  
16  
17  
18  
19  
20  
21  
22  
23  
24  
25  
26  
27  
28  
29  
30  
31  
32  
33  
34  
35  
36  
37  
38  
39  
40  
41  
42  
43  
44  
45  
46  
47

**Table 5 Results of individual reviews that report a narrative synthesis for flail chest**

| Study details                                                                                 | Included studies                                                                                                                                                                                                                                                                                           | Outcomes assessed                                                                                                                                                                                                                  | Narrative Synthesis                                                                                                                                                                                                                                                                                                                                                                                                                                                                                                                                                                                                                                                                                                                                                                                                                                                                                                                                                                                     |
|-----------------------------------------------------------------------------------------------|------------------------------------------------------------------------------------------------------------------------------------------------------------------------------------------------------------------------------------------------------------------------------------------------------------|------------------------------------------------------------------------------------------------------------------------------------------------------------------------------------------------------------------------------------|---------------------------------------------------------------------------------------------------------------------------------------------------------------------------------------------------------------------------------------------------------------------------------------------------------------------------------------------------------------------------------------------------------------------------------------------------------------------------------------------------------------------------------------------------------------------------------------------------------------------------------------------------------------------------------------------------------------------------------------------------------------------------------------------------------------------------------------------------------------------------------------------------------------------------------------------------------------------------------------------------------|
| <b>Author</b><br>Unsworth <sup>20</sup><br><b>Year</b><br>2015<br><b>Country</b><br>Australia | RCT = 2<br>Granetzny(40)<br>Tanaka (37)<br>Marasco (46)<br>Non randomised= 6<br>Ahmed (64)<br>Althausen (50)<br>Doben (21)<br>De Moya (48)<br>Nirula(60)<br>Voggenreiter (42)<br>Total number of patients = 408                                                                                            | <ul style="list-style-type: none"> <li>• Mortality</li> <li>• Pneumonia</li> <li>• Pneumothorax and haemothorax</li> <li>• Hospital length of stay</li> <li>• ICU stay</li> <li>• Costings</li> <li>• Treatment outcome</li> </ul> | <ul style="list-style-type: none"> <li>• Significant decrease in mechanical ventilation requirements after surgical fixation. decreasing in ventilator-acquired pneumonia after surgical fixation</li> <li>• decrease in ICU-LOS, fewer days of mechanical ventilation and cost savings compared to non-operative management</li> <li>• decreased days of ventilator dependence, and shorter ICU-LOS</li> <li>• lower incidence of pneumonia, a higher return to full time work at six months</li> <li>• less persistent pain at six and 12 months in those receiving surgery</li> <li>• significantly fewer days of mechanical ventilation and a shorter hospital and ICU-LOS</li> <li>• The estimated cost savings ranged from US Dollars 10,000 to AU Dollars 14,443 per patient with surgical rib fixation as a result of the decrease in ICU-LOS.</li> <li>• None of the studies were large enough to draw conclusions on the effect of this intervention on thromboembolism and death.</li> </ul> |
| <b>Author</b><br>de Lesquen <sup>16</sup><br><b>Year</b><br>2015<br><b>Country</b><br>France  | Meta-analysis = 2<br>Leneike 9 studies (538 patients)<br>Slobogean 11 studies (732 patients)<br>RCT = 3<br>Marasco (46)<br>Granetzny(40)<br>Tanaka (37)<br>Non-randomised= 6<br>Ahmed (64)<br>Karev (40)<br>Voggenreiter (20)<br>Balci (64)<br>Nirula(60)<br>Althausen(50)<br>Total number of patients=421 | <ul style="list-style-type: none"> <li>• Duration of IMV</li> <li>• LOS ICU</li> <li>• Pneumonia</li> <li>• Mortality</li> </ul>                                                                                                   | For flail chest, early surgical stabilization can be considered in patients who would require mechanical ventilation for >48 h (Grade B, extrapolated recommendations from Level I evidences).                                                                                                                                                                                                                                                                                                                                                                                                                                                                                                                                                                                                                                                                                                                                                                                                          |

|                                                                                                                                  |                                                                                                                                                                                                                                                                                                                                                                                   |                                                                                                                                                                                                                                                                       |                                                                                                                                                                                                                                                                                                                                                                             |
|----------------------------------------------------------------------------------------------------------------------------------|-----------------------------------------------------------------------------------------------------------------------------------------------------------------------------------------------------------------------------------------------------------------------------------------------------------------------------------------------------------------------------------|-----------------------------------------------------------------------------------------------------------------------------------------------------------------------------------------------------------------------------------------------------------------------|-----------------------------------------------------------------------------------------------------------------------------------------------------------------------------------------------------------------------------------------------------------------------------------------------------------------------------------------------------------------------------|
| <p><b>Author</b><br/>NICE <sup>12</sup><br/><b>Year</b><br/>2010<br/><b>Country</b><br/>UK</p>                                   | <p>RCT = 1<br/>Tanaka (37)<br/>Non-randomised = 2<br/>Voggenreiter (42)<br/>Paris (29)<br/>Case Series = 4<br/>Lardinois (66)<br/>Mouton (23)<br/>Menard (18)<br/>Hellberg (10)<br/>Total number of patients=225<br/>Intervention group = 173<br/>Control group = 52</p>                                                                                                          | <ul style="list-style-type: none"> <li>• Duration of IMV</li> <li>• Mortality</li> <li>• LOS ICU</li> <li>• Pneumonia</li> <li>• Lung function</li> <li>• Return to Employment</li> <li>• Sepsis</li> <li>• Pain or discomfort requiring removal of plates</li> </ul> | <p>Surgical stabilisation with metal rib reinforcements aims to allow earlier weaning from mechanical ventilation, reduce acute complications and avoid chronic pain sometimes associated with permanent malformation of the chest wall. Kirschner wire may be used on its own, but this method of ribstabilisation is not covered by this guidance.</p>                    |
| <p><b>Author</b><br/>Schulte <sup>14</sup><br/><b>Year</b><br/>2016<br/><b>Country</b><br/>UK</p>                                | <p>Systematic Review = 1<br/>Slobogean (753)<br/>RCT = 1<br/>Marasco (23,23)<br/>Non-randomised studies = 9<br/>Jayle (10,10)<br/>Pieracci (35,35)<br/>Zhang (24,15)<br/>Wada (84,336)<br/>Granhed (60,153)<br/>Doben (10,11)<br/>Xu (17,15)<br/>Althausen (22,28)<br/>De Moya (16,32)<br/>Total number of patients=1712<br/>Intervention group = 301<br/>Control group = 658</p> | <ul style="list-style-type: none"> <li>• Duration of IMV</li> <li>• Mortality</li> <li>• LOS hospital</li> <li>• LOS ICU</li> <li>• Pneumonia</li> </ul>                                                                                                              | <p>Surgical stabilization of flail chest in thoracic trauma patients has beneficial effects with respect to reduced ventilatory support, shorter intensive care and hospital stay, reduced incidence of pneumonia and septicemia, decreased risk of chest deformity and an overall reduced mortality when compared with patients who received non-operative management.</p> |
| <p>ICU = Intensive care unit, IMV = invasive mechanical ventilation, LOS = Length of stay, RCT = Randomised controlled trial</p> |                                                                                                                                                                                                                                                                                                                                                                                   |                                                                                                                                                                                                                                                                       |                                                                                                                                                                                                                                                                                                                                                                             |

### Multiple rib fractures

Two systematic reviews<sup>15 22</sup> included one primary study<sup>31</sup> that reported length of mechanical ventilation for multiple rib fracture patients (Table 6). The cohort study which had matched non-operative controls<sup>31</sup> reported a statistically significant reduction in post-operative ventilator days ( $p = 0.02$ ) in favour of the fixation group; however there was no statistical difference in total ventilator days ( $p = 0.12$ ). It was unclear what the non-operative treatment consisted of.

For peer review only

Table 6 Results of individual reviews that report a narrative synthesis for multiple rib fractures

| Study details                                                                                  | Included studies                                                                                                                                                                                                                                                                                                                            | Outcomes assessed                                                                                                                                       | Narrative Synthesis                                                                                                                                                                                                                                                                                                                                                                                                                                                                                                                                                                                                                                                                                                                                                                                                |
|------------------------------------------------------------------------------------------------|---------------------------------------------------------------------------------------------------------------------------------------------------------------------------------------------------------------------------------------------------------------------------------------------------------------------------------------------|---------------------------------------------------------------------------------------------------------------------------------------------------------|--------------------------------------------------------------------------------------------------------------------------------------------------------------------------------------------------------------------------------------------------------------------------------------------------------------------------------------------------------------------------------------------------------------------------------------------------------------------------------------------------------------------------------------------------------------------------------------------------------------------------------------------------------------------------------------------------------------------------------------------------------------------------------------------------------------------|
| <b>Author</b><br>de Jong <sup>22</sup><br><b>Year</b><br>2014<br><b>Country</b><br>Netherlands | RCT = 0<br>Non-randomised = 1<br>Nirula (60)<br>Case Series = 2<br>Campbell (32)<br>Mayberry (46, 15 non-flail)<br>Total number of patients=138<br>Intervention group = 108<br>Control group = 30                                                                                                                                           | <ul style="list-style-type: none"> <li>• LOS hospital</li> <li>• Duration of IMV</li> <li>• Time of operation</li> <li>• Chronic pain</li> </ul>        | Only Nirula et al. concluded that rib fracture fixation showed a trend toward fewer total ventilator days. Mayberry et al. investigated the quality of life after rib fixation, and they concluded that there was low long-term morbidity and pain. Campbell et al. demonstrated low levels of pain and satisfactory rehabilitation.                                                                                                                                                                                                                                                                                                                                                                                                                                                                               |
| <b>Author</b><br>Girsowicz <sup>15</sup><br><b>Year</b><br>2012<br><b>Country</b><br>France    | Non-systematic review = 1<br>Nirula and Mayberry<br>Case Comparator = 1<br>Nirula (30,30)<br>Case Series = 4<br>Mayberry (46)<br>Richardson (7)<br>Barajas (22)<br>Campbell (32)<br>Case report = 3<br>Gasparri (1)<br>Cacchione (1)<br>Kerr-Valentic (1)<br>Total number of patients=169<br>Intervention group = 139<br>Control group = 30 | <ul style="list-style-type: none"> <li>• Pain</li> <li>• Disability</li> <li>• Respiratory function</li> <li>• Number of days lost from work</li> </ul> | In general, of the nine studies presented, all indicated that surgical stabilization in the management of isolated multiple non-flail and painful rib fractures improved outcomes. Indeed, the interest and benefit was shown not only in terms of pain and respiratory function but also in improved quality of life and reduced socio-professional disability. Hence, the current evidence shows surgical stabilization to be safe and effective in alleviating post-operative pain and improving patient recovery, thus enhancing the outcome of the procedure. However, retrieved studies provided a low level of evidence (small studies with few numbers of patients and short-term follow-up or case reports). Large prospective controlled trials are thus necessary to confirm these encouraging results. |
| IMV = invasive mechanical ventilation, RCT = Randomised controlled trial                       |                                                                                                                                                                                                                                                                                                                                             |                                                                                                                                                         |                                                                                                                                                                                                                                                                                                                                                                                                                                                                                                                                                                                                                                                                                                                                                                                                                    |

## Mortality

### Flail Chest

Seven systematic reviews reported mortality; six of these pooled the data in a meta-analysis<sup>17-19 21 23 24</sup> and one reported data as a narrative synthesis<sup>16</sup>. Three systematic reviews<sup>18 19 21</sup> which pooled the same three RCTs<sup>25-27</sup> showed a non-statistically significant reduction in mortality with internal surgical fixation compared to non-operative management (RR (Fixed) 0.56, 95% CI [0.13, 2.42]<sup>18 21</sup> and RR (Random) 0.57, 95% CI [0.13, 2.52]<sup>19</sup> (Table 4)).

Three systematic reviews pooled randomised and non-randomised studies.<sup>17 23 24</sup> The most recent review,<sup>17</sup> pooled the three RCTs<sup>25-27</sup> and ten non-randomised studies.<sup>5 28-43</sup> This review demonstrated there was a statistically significant reduction in mortality with surgical fixation compared to non-operative treatment (RR (random) 0.44, SD (0.09)<sup>17</sup>). The later reviews<sup>23 24</sup> were published before the RCT by Marasco et al.<sup>27</sup> and hence were not included in the meta-analyses (RR (fixed) 0.43, 95% CI [0.28, 0.69] and RR (fixed) 0.19, 95% CI [0.13, 0.26], respectively). Overall, statistical heterogeneity was low ( $I^2=0\%$ ) for this outcome in all studies that presented this data.<sup>17-19 21 23 24</sup>

### Multiple rib fractures

Mortality was not assessed in the reviews by de Jong et al.<sup>22</sup> or Girsowicz et al.<sup>15</sup>

## Length of ICU Stay (days)

### Flail Chest

Eight systematic reviews<sup>12 16-19 21 23 24</sup> assessed length of ICU stay; six of these performed a meta-analysis.<sup>17-19 21 23 24</sup> Pooled estimates ranged from -3.25 days [SD 1.29]<sup>17</sup> to -6.46 days, CI 95% [-9.73, -3.19]<sup>19</sup> and were all in favour of surgical fixation compared to a variety of comparators (Table 4). The range in pooled estimates may be partly explained by the pooling of different sets of studies.

1  
2  
3 Three reviews included the same RCT<sup>27</sup> but the data extracted from the RCT for this  
4 outcome varied across reviews. Differences occurred as some pooled median length of ICU  
5 stay and others pooled the mean. Furthermore, some used postoperative time spent in ICU  
6 and others the total time spent in ICU.<sup>17-19</sup>

7  
8  
9  
10  
11 Variation also arose across reviews in the data extracted from another trial due to standard  
12 deviations not being reported in the primary publication.<sup>26</sup> Imputation values were calculated  
13 or the raw data obtained from the authors resulting in SD values ranging from 0.7 to 4.4 and  
14 2.2 to 7.3 in the operative and non-operative groups respectively. There was also a  
15 substantial difference in the effect estimate of this study<sup>26</sup> in one of the reviews<sup>24</sup> compared  
16 to the data included in the other reviews. The data reported in this review was -10 days, 95%  
17 CI [-15.41, -4.59] which is 5 days greater than the data from the same study included in  
18 other reviews. It is the same as the length of mechanical ventilation effect estimate  
19 reported in the same study<sup>26</sup> so is possibly a transcription error.

20  
21  
22  
23  
24  
25  
26  
27  
28  
29  
30 Statistical heterogeneity ranged from substantial to none<sup>44</sup> for this outcome with  $I^2$  values  
31 of 74.9%<sup>24</sup>, 40%<sup>18</sup>, 35%<sup>19</sup> and 0.1%<sup>23</sup>. The narrative syntheses concluded that in patients  
32 with flail chest undergoing surgical fixation length of ICU stay was reduced compared to non-  
33 operative management.<sup>16 20</sup>

### 34 Multiple rib fractures

35  
36  
37  
38  
39  
40  
41 A single review reported length of stay in ICU for patients with multiple rib fractures<sup>15</sup>. Within  
42 this review one non-randomised study reported a reduction in ICU days but this was not  
43 statistically significant ( $p = 0.51$ ), however the mean difference and 95% CIs were not  
44 reported<sup>31</sup>.

## 45 Length of Hospital Stay (days)

### 46 Flail Chest

47  
48  
49  
50  
51  
52  
53  
54  
55  
56  
57  
58  
59  
60  
Nine systematic reviews<sup>12 16-21 23 24</sup> assessed length of hospital stay and six of these reported  
a meta-analysis.<sup>17-19 21 23 24</sup> Two of the systematic reviews<sup>17 21</sup> pooled the same two trials<sup>25 26</sup>



1  
2  
3 for length of stay in hospital and found a significantly shorter hospital length of stay in favour  
4 of the operative group compared to non-operative management (MD -11.39 days 95% CI [-  
5 12.39, -10.38]). When non-randomised studies were included in the meta-analysis the  
6  
7 pooled effects were smaller (-3.83 days, 95% CI [-7.12,-0.54],<sup>24</sup> -4 days, 95% CI [-7.4, -0.7]<sup>23</sup>  
8  
9 and -4.48 days, SD (1.98)<sup>17</sup> in favour of fixation; Table 4).  
10  
11

12  
13 When pooling the two RCTs in the systematic reviews, heterogeneity was low  $I^2 = 0$ ,<sup>18 19</sup>,  
14  
15 however when pooling a greater number of studies including non – randomised studies the  
16  
17 heterogeneity was moderate to substantial, ( $I^2 = 89\%$ ,<sup>17</sup>  $I^2 = 68.9\%$ <sup>24</sup> and  $I^2 = 33\%$ <sup>23</sup>  
18  
19 respectively).  
20  
21

22 In the narrative synthesis by one review,<sup>20</sup> they reported that in patients with flail chest  
23  
24 undergoing surgical fixation the length of hospital stay was less in one non-randomised  
25  
26 study<sup>34</sup> and in one RCT<sup>26</sup> in the fixation group compared to the non-operative group. No data  
27  
28 or significance values were reported in this review.  
29  
30

### 31 Multiple rib fractures

32  
33 Two systematic reviews<sup>15 22</sup> included a single non-randomised study that assessed length of  
34  
35 hospital stay (days).<sup>31</sup> This study reported a shorter total hospital stay in the operative group  
36  
37 (mean 18.8 days (SD 1.8)) compared to the non-operative group (mean 21.1 days (SD 3.9)  
38  
39 (p=0.59)).  
40  
41

## 42 Pneumonia

### 43 Flail Chest

44  
45 Ten systematic reviews<sup>12 16-19 21 23 24 45</sup>, assessed pneumonia and six of these reported a  
46  
47 meta-analysis for this outcome.<sup>14 17-21 23 24</sup> In all of the reviews, the risk of developing  
48  
49 pneumonia was found to be lower in the surgical fixation group compared to the non-  
50  
51 operative group. Three RCTs<sup>25-27</sup> were pooled in two of the reviews<sup>16 17</sup> and they found a risk  
52  
53 reduction of 0.36, 95% CI [0.15, 0.85], in favour of operative fixation compared to non-  
54  
55 operative management. When non-randomised studies were combined the risk reductions  
56  
57  
58  
59  
60

1  
2  
3 ranged from 0.31, 95% CI [0.21, 0.41] to 0.45, 95% CI [0.29, 0.70] in favour of fixation (Table  
4  
5 4).

6  
7 Substantial heterogeneity was seen in meta-analyses for this outcome<sup>18 19 21</sup> that included  
8  
9 the three RCTs<sup>25-27</sup> ( $I^2 = 66\%$  to  $74\%$ ). In the reviews that pooled the RCTs alongside the  
10  
11 non-randomised studies<sup>23 24</sup> there were lower levels of heterogeneity ( $I^2 = 4\%$  and  $I^2 = 31\%$ ,  
12  
13 respectively).

14  
15  
16 Two narrative syntheses reported that among patients with flail chest undergoing surgical  
17  
18 fixation the risk of pneumonia were reduced in the fixation group compared to the non-  
19  
20 operative group.<sup>16 20</sup> One review<sup>20</sup> included two non-randomised studies<sup>34 35</sup> and two RCTs<sup>25</sup>  
21  
22 <sup>26</sup> but the conclusions could not be verified as there were no effect estimates, confidence  
23  
24 intervals or significance values reported. The other review,<sup>16</sup> included four non-randomised  
25  
26 studies<sup>29 33-35</sup> and three RCTs,<sup>25-27</sup> four of the included studies report a statistically significant  
27  
28 reduction <sup>25 29 33 34</sup> ( $p < 0.05$ ) and three a non-statistically significant reduction in pneumonia  
29  
30 associated with the intervention.<sup>26 27 35</sup>

## 31 32 33 **Tracheostomy**

### 34 35 **Flail Chest**

36  
37 Five systematic reviews included a meta-analysis of the outcome of tracheostomy.<sup>17 18 21 23 24</sup>  
38  
39 Pooled relative risks within each review ranged from 0.25, 95% CI [0.13, 0.47] to 0.40, 95%  
40  
41 CI [0.2, 0.7] (Table 4).

42  
43  
44 Moderate and substantial heterogeneity was seen in two reviews ( $I^2=42\%$ <sup>17</sup>,  $I^2=64\%$ <sup>21</sup>), two  
45  
46 reviews <sup>23 24</sup> had low heterogeneity ( $I^2=0\%$ ), and one did not report heterogeneity<sup>18</sup>.

## 47 48 49 **Sepsis**

### 50 51 **Flail Chest**

52 One review,<sup>23</sup> pooling four non-randomised studies<sup>30 33 35 46</sup> estimated a RR of 0.14, 95% CI  
53  
54 [0.56, 0.23] with  $I^2=0\%$  in favour of fixation compared to non-operative management. The  
55  
56 estimate RR reported is not possible given the confidence interval does not include the  
57  
58

1  
2  
3 estimated value, 0.14. The lower interval of 0.56 could possibly be -0.56 creating a wider CI  
4 and would suggest that the author's conclusion was correct and there was a statistically  
5 significant difference in favour of fixation. The odds ratio is also presented for the same  
6 pooled analysis and reported as 0.36, 95% CI [0.19, 0.71],  $I^2=0\%$ .  
7  
8  
9

## 10 11 **Spirometry**

### 12 Flail Chest

13  
14  
15 One of the reviews<sup>19</sup> reported a meta-analysis of spirometry data which included two RCTs<sup>26</sup>  
16  
17  
18  
19  
20  
21  
22  
23  
24  
25  
26  
27  
28  
29  
30  
31  
32  
33  
34  
35  
36  
37  
38  
39  
40  
41  
42  
43  
44  
45  
46  
47  
48  
49  
50  
51  
52  
53  
54  
55  
56  
57  
58  
59  
60  
No statistically significant differences in any spirometry data were seen between surgical  
fixation and non-surgical approaches (Table 4).

## 11 12 **Chest Deformity**

### 13 Flail Chest

14  
15  
16  
17  
18  
19  
20  
21  
22  
23  
24  
25  
26  
27  
28  
29  
30  
31  
32  
33  
34  
35  
36  
37  
38  
39  
40  
41  
42  
43  
44  
45  
46  
47  
48  
49  
50  
51  
52  
53  
54  
55  
56  
57  
58  
59  
60  
Two reviews reported a meta-analysis of chest deformity.<sup>23 21</sup> Both reported a statistically  
significant effect estimate in favour of surgical fixation compared to non-operative  
management (RR 0.30, 95% CI [0.00, 0.60],  $I^2=2.1\%$  and RR 0.13, 95% CI [0.03 to 0.67],  
 $I^2=0\%$ ).

## 11 12 **Dyspnoea**

### 13 Flail chest

14  
15  
16  
17  
18  
19  
20  
21  
22  
23  
24  
25  
26  
27  
28  
29  
30  
31  
32  
33  
34  
35  
36  
37  
38  
39  
40  
41  
42  
43  
44  
45  
46  
47  
48  
49  
50  
51  
52  
53  
54  
55  
56  
57  
58  
59  
60  
One review<sup>23</sup> pooled studies reporting dyspnoea in a meta-analysis and included one RCT<sup>25</sup>  
and two non-randomised studies.<sup>35 47</sup> They reported a difference in favour of surgical fixation  
with a pooled risk ratio of 0.15, 95% CI [0.09 to 0.39]; however, when these data were  
expressed as odds ratios the results were no longer statistically significant (OR 0.40, 95% CI  
[0.16, 1.01]). Duration of follow-up for this outcome was one year for two of the primary  
studies<sup>47 25</sup> and unclear in the third.<sup>35</sup> It was unclear how dyspnoea was measured or defined  
in the three primary studies.

## 11 12 **Chest Pain**

## Flail chest

Chest pain was reported in one systematic review<sup>23</sup> which included two primary studies (one RCT<sup>25</sup> and one non-randomised study<sup>47</sup>) and data were pooled in a meta-analysis which suggested a benefit in favour of fixation (OR 0.40, 95% CI [0.01, 12.60] and RR 0.18, CI 95% [0.46, 0.83]).

## Other reported outcomes

Several other outcomes were reported within the systematic reviews however no others have been pooled in a meta-analysis. A narrative synthesis was not completed on the outcomes: wound infection, pain-requiring removal of metalwork, return to work, socio-professional disability cost, pulmonary embolism, pneumothorax and haemothorax. In the reviews, data on these additional outcomes was minimal and presented as a narrative synthesis without presenting numerical data (Table 5 and Table 6).

## DISCUSSION

Twelve systematic reviews were identified that focused on the effectiveness of surgical fixation for flail chest and multiple rib fractures and were reported between 2010 and 2016. This is the first systematic review of reviews and highlighted that there are a large number of reviews focusing on the same aims and including the same primary studies.

## Flail chest

Six<sup>17-19 21 23 24</sup> of the 12 systematic reviews presented meta-analyses for flail chest based on overlapping primary studies. They reported reductions in length of mechanical ventilation, length of stay, pneumonia and tracheostomy rates with surgical fixation compared to non-operative management and inconsistent results for mortality. Across many of the meta-analyses there was moderate to high levels of heterogeneity and variation in the effect estimates.

1  
2  
3 A single systematic review found reductions in sepsis, dyspnoea, chest deformity and chest  
4 pain with fixation compared to non-operative management. Nevertheless, as the definitions  
5 of these were not accurately described it is difficult to know whether the reductions are  
6 clinically significant. Reporting of adverse outcomes was infrequent across the reviews,  
7 which could reflect lack of measurement and/or reporting of adverse events in the primary  
8 studies or the systematic reviews. Therefore there is a risk that without consideration the  
9 risks, the benefits of surgery could be overestimated in light of the potential risks.

10  
11  
12  
13  
14  
15  
16  
17  
18  
19  
20  
21  
22  
23  
24  
25  
26  
27  
28  
29  
30  
31  
32  
33  
34  
35  
36  
37  
38  
39  
40  
41  
42  
43  
44  
45  
46  
47  
48  
49  
50  
51  
52  
53  
54  
55  
56  
57  
58  
59  
60  
Synthesising multiple meta-analyses data that use the overlapping primary studies has the  
potential to overestimate the strength of the findings therefore it is important to be mindful of  
the limited evidence on which our conclusions are based. In addition, significant  
heterogeneity for several of the outcomes that were pooled makes drawing firm conclusions  
difficult.

### Multiple rib fractures

Evidence in support of multiple rib fracture fixation in the absence of flail chest is limited.

Two systematic reviews<sup>15 22</sup> reported on one non-randomised study<sup>31</sup> that recruited between  
1996 and 2000, four case series<sup>48-51</sup> and two case reports.<sup>52 53</sup> Hence, due to lack of primary  
data to synthesise no conclusive statements on effectiveness can be drawn. Only one  
outcome showed a statistically significant improvement for multiple rib fractures after surgical  
fixation from one non-randomised study<sup>31</sup> and showed a mean improvement of 4.7 post-  
operative ventilator days with fixation compared to non-operative management ( $p=0.02$ ).  
The only other value reported compared the total ventilator days within this same study<sup>31</sup>  
and did not show a statistically significant improvement ( $p=0.12$ ).

### Review quality

A significant amount effort and time is required to conduct a high quality systematic review  
and should only be undertaken when there is sufficient cause<sup>54 55</sup> (e.g. to incorporate the  
findings of a new RCT or to address an evidence gap). Eight of the systematic reviews were  
published within 18 months of each other; although none were registered on PROSPERO<sup>56</sup>

1  
2  
3 so it is possible the authors were unaware of each other's research. Registering reviews  
4 allows transparency of methods and also reduces research waste.<sup>57</sup> As similar search  
5 strategies and search dates were used in each systematic review inevitably, many of the  
6 included studies were the same across reviews.  
7  
8  
9

10  
11 Only two of the 12 systematic reviews formally appraised the quality of the included studies,  
12 therefore 10 of the reviews were not in a position to fully consider the impact of risk of bias  
13 on their conclusions. High risk of bias within reviews have affected the conclusions drawn  
14 from this evidence synthesis. In a systematic review of 106 emergency surgery systematic  
15 reviews, a low risk of bias was found in 53.8% this identifies a common problem of poor  
16 quality reviews conducted in emergency surgery.<sup>58</sup>  
17  
18  
19  
20  
21  
22  
23

#### 24 Heterogeneity and meta-analysis errors

25  
26 The  $I^2$  value describes the percentage of total variation across studies that is due to  
27 heterogeneity rather than chance.<sup>59</sup> Examining the meta-analyses including RCTs highlights  
28 moderate to high levels of statistical heterogeneity.  
29  
30  
31  
32

33 There was also clinical variation in the primary studies in terms of indications and timing of  
34 surgery and it is possible that these between study differences could be the cause of the  
35 significant heterogeneity. For example, in one RCT<sup>25</sup> patients were randomised after 5 days  
36 of invasive ventilation, whereas another RCT<sup>26</sup> randomised and fixed within 24 to 72 hours  
37 regardless of initial intubation state. Also, many reviews define the comparator as usual care  
38 or non-operative care but do not elaborate on what encompasses this care. Differences in  
39 how outcomes were measured may have contributed to between study heterogeneity. It was  
40 unknown due to lack of reporting whether the outcomes were equivalent in the pooled  
41 primary studies or overall between systematic reviews.  
42  
43  
44  
45  
46  
47  
48  
49  
50

51 In all systematic reviews with meta-analyses, they reported that two reviewers were involved  
52 in the data extraction to minimise errors.<sup>17 19 21 23 24</sup> Despite attempts to minimise errors and  
53 therefore an apparent low risk of bias, some errors (up to an MD of 10 days in the  
54  
55  
56  
57  
58  
59  
60

1  
2  
3 measurement of length of intensive care stay) were identified across reviews. It is worth  
4 noting that there were no significant changes in the conclusions drawn from these analyses.  
5  
6 Although there was substantial statistical and clinical heterogeneity and lack of consideration  
7 of risk of bias in many of the reviews, conclusions tended to be similar and in the direction of  
8 benefit with fixation suggesting that further high quality RCTs investigating the effectiveness  
9 (including adverse effects) of internal surgical fixation over non-operative management are  
10 warranted.  
11  
12  
13  
14  
15

### 16 17 Strengths

18  
19 Multiple databases were searched for studies and study selection was undertaken by two  
20 researchers, reducing the risk of error and bias. Although only English language studies  
21 were included, some sources of unpublished studies were searched. It was suspected from  
22 the publication dates of seven systematic reviews within 2 years that primary studies could  
23 have be synthesised in more than one review therefore a mapping of the studies included in  
24 the reviews was undertaken.  
25  
26  
27  
28  
29  
30  
31  
32  
33  
34

### 35 Limitations

36  
37 All systematic reviews were included irrespective of their risk of bias scoring. It could be  
38 argued that several reviews were stretching the traditional definition of a systematic review  
39 however they did hold to the protocol definition with an electronic database search strategy  
40 and included primary evidence. Due to best evidence topics and rapid evidence synthesis  
41 being included it was then difficult to apply the ROBIS tool consistently. The ROBIS tool is  
42 not designed for rapid evidence synthesis and therefore this type of review showed high risk  
43 of bias as they were being assessed against a tool designed for full systematic reviews.  
44  
45  
46  
47  
48  
49 Rapid evidence syntheses, by their nature address a trade-off between time and  
50 methodological rigour and comprehensiveness.<sup>60</sup>  
51  
52  
53  
54  
55  
56  
57  
58  
59  
60

## CONCLUSION

The considerable duplication of work across reviews could be mitigated through protocol registration and greater attention to establishing whether a review is necessary by scoping the literature before commencing a new review. Despite this review identifying 12 systematic reviews they only included 37 unique primary studies, only three of which were RCTs. Synthesis of the reviews has shown some potential improvement in patient outcomes with flail chest after surgical fixation. However, there were differences in indications and timing of surgical fixations in the primary studies and moderate to high levels of heterogeneity across reviews. Further robust evidence is required before conclusions can be drawn of the effectiveness of surgical fixation for flail chest and in particular, multiple rib fractures.

## Acknowledgments and Funding statement

This review was completed as part of an MD project which was funded by an educational grant from Orthopaedic Research UK. The funders had no role in study design, data collection and analysis, decision to publish, or preparation of the manuscript. The research was undertaken at the BOA Orthopaedic Surgery Research Centre (BOSRC) at York Trials Unit

## Contributor statement

HI contributed to conceptualisation, methodology, investigation, formal analysis, original draft preparation. EC contributed to investigation, validation, review and editing. WE contributed to funding acquisition, conceptualisation, review and editing. AR contributed to funding acquisition, conceptualisation, review and editing. CH contributed to methodology, supervision, conceptualisation, review and editing. CM contributed to methodology, investigation, validation, conceptualisation, supervision, review and editing. All authors approve the final version of the manuscript and are accountable for all aspects of the work.

## Competing Interests

None declared



1  
2  
3  
4  
5  
6  
7  
8  
9  
10  
11  
12  
13  
14  
15  
16  
17  
18  
19  
20  
21  
22  
23  
24  
25  
26  
27  
28  
29  
30  
31  
32  
33  
34  
35  
36  
37  
38  
39  
40  
41  
42  
43  
44  
45  
46  
47  
48  
49  
50  
51  
52  
53  
54  
55  
56  
57  
58  
59  
60

**Data sharing statement**

All data used for the preparation of this review are reported within the manuscript or its supplementary files.

For peer review only

## REFERENCES

1. Veysi VT, Nikolaou VS, Paliobeis C, et al. Prevalence of chest trauma, associated injuries and mortality: a level I trauma centre experience. *Int Orthop* 2009;33(5):1425-33. doi: 10.1007/s00264-009-0746-9 [published Online First: 2009/03/07]
2. American College of Surgeons. NTDB ANNUAL REPORT 2016. In: Chang MC, ed., 2016.
3. Brasel KJ, Moore EE, Albrecht RA, et al. Western Trauma Association Critical Decisions in Trauma: Management of rib fractures. *Journal of Trauma and Acute Care Surgery* 2017;82(1):200-03. doi: 10.1097/ta.0000000000001301
4. Vyhnanek F, Jirava D, Ocadlik M, et al. Surgical Stabilisation of Flail Chest Injury: Indications, Technique and Results. *Acta Chirurgiae Orthopaedicae Et Traumatologiae Cechoslovaca* 2015;82(4):303-07.
5. De Moya M, Bramos T, Agarwal S, et al. Pain as an indication for rib fixation: A bi-institutional pilot study. *Journal of Trauma - Injury, Infection and Critical Care* 2011;71(6):1750-54. doi: <http://dx.doi.org/10.1097/TA.0b013e31823c85e9>
6. Velasquez M, Ordonez CA, Parra MW, et al. Operative versus Nonoperative Management of Multiple Rib Fractures. *Am Surg* 2016;82(5):E103-E05.
7. Bhatnagar A, Mayberry J, Nirula R. Rib fracture fixation for flail chest: What is the benefit? *J Am Coll Surg* 2012;215(2):201-05. doi: <http://dx.doi.org/10.1016/j.jamcollsurg.2012.02.023>
8. Centre for Reviews and Dissemination. Systematic Reviews - CRD's guidance for undertaking reviews in health care: York Publishing Services 2009.
9. Whiting P, Savović J, Higgins JPT, et al. ROBIS: A new tool to assess risk of bias in systematic reviews was developed. *Journal of Clinical Epidemiology* 2016;69:225-34. doi: 10.1016/j.jclinepi.2015.06.005
10. Page MJ, McKenzie JE, Kirkham J, et al. Bias due to selective inclusion and reporting of outcomes and analyses in systematic reviews of randomised trials of healthcare interventions. *Cochrane Database Syst Rev* 2014(10) doi: 10.1002/14651858.MR000035.pub2
11. Moher D, Liberati A, Tetzlaff J, et al. Preferred reporting items for systematic reviews and meta-analyses: the PRISMA statement. *J Clin Epidemiol* 2009;62 doi: 10.1016/j.jclinepi.2009.06.005
12. National Institute for Clinical Excellence. Insertion of metal rib reinforcements to stabilise a flail chest wall. *Interventional procedures guidance* 2010;[IPG361]
13. Khan OA, Dunning J, Parvaiz AC, et al. Towards evidence-based medicine in surgical practice: Best BETs. *Int J Surg* 2011;9(8):585-88. doi: <https://doi.org/10.1016/j.ijsu.2011.08.001>
14. Schulte K, Whitaker D, Attia R. In patients with acute flail chest does surgical rib fixation improve outcomes in terms of morbidity and mortality? *Interactive Cardiovascular and Thoracic Surgery* 2016;23(2):314-19. doi: <http://dx.doi.org/10.1093/icvts/ivw092>
15. Girsowicz E, Falcoz PE, Santelmo N, et al. Does surgical stabilization improve outcomes in patients with isolated multiple distracted and painful non-flail rib fractures? *Interactive Cardiovascular and Thoracic Surgery* 2012;14(3):312-15. doi: <http://dx.doi.org/10.1093/icvts/ivr028>
16. de Lesquen H, Avaro JP, Gust L, et al. Surgical management for the first 48 h following blunt chest trauma: state of the art (excluding vascular injuries). *Interactive Cardiovascular and Thoracic Surgery* 2015;20(3):399-408. doi: 10.1093/icvts/ivu397
17. Swart E, Laratta J, Slobogean G, et al. Operative Treatment of Rib Fractures in Flail Chest Injuries: A Meta-Analysis and Cost Effectiveness Analysis. *J Orthop Trauma* 2016; Publish Ahead of Print doi: 10.1097/bot.0000000000000750
18. Schuurmans J, Goslings JC, Schepers T. Operative management versus non-operative management of rib fractures in flail chest injuries: a systematic review. *European Journal of Trauma and Emergency Surgery* 2016;1-6. doi: 10.1007/s00068-016-0721-2

19. Coughlin TA, Ng JWG, Rollins KE, et al. Management of rib fractures in traumatic flail chest A meta-analysis of randomised control trials. *Bone & Joint Journal* 2016;98B(8):1119-25. doi: 10.1302/0301-620x.98b8.37282
20. Unsworth A, Curtis K, Asha SE. Treatments for blunt chest trauma and their impact on patient outcomes and health service delivery. *Scandinavian Journal of Trauma Resuscitation & Emergency Medicine* 2015;23 doi: 10.1186/s13049-015-0091-5
21. Cataneo AJ, Cataneo DC, de Oliveira FH, et al. Surgical versus nonsurgical interventions for flail chest. *The Cochrane database of systematic reviews* 2015;7:CD009919. doi: <http://dx.doi.org/10.1002/14651858.CD009919.pub2>
22. de Jong MB, Kokke MC, Hietbrink F, et al. Surgical Management of Rib Fractures: Strategies and Literature Review. *Scandinavian Journal of Surgery* 2014;103(2):120-25. doi: 10.1177/1457496914531928
23. Slobogean GP, MacPherson CA, Sun T, et al. Surgical fixation vs nonoperative management of flail chest: A meta-analysis. *Journal of the American College of Surgeons* 2013;216(2):302-11.e1. doi: <http://dx.doi.org/10.1016/j.jamcollsurg.2012.10.010>
24. Leinicke JA, Elmore L, Freeman BD, et al. Operative management of Rib fractures in the setting of flail chest: A systematic review and meta-analysis. *Annals of Surgery* 2013;258(6):914-21. doi: <http://dx.doi.org/10.1097/SLA.0b013e3182895bb0>
25. Tanaka H, Yukioka T, Yamaguti Y, et al. Surgical stabilization of internal pneumatic stabilization? A prospective randomized study of management of severe flail chest patients. *Journal of Trauma - Injury, Infection and Critical Care* 2002;52(4):727-32.
26. Granetzny A, Abd El-Aal M, Emam E, et al. Surgical versus conservative treatment of flail chest. Evaluation of the pulmonary status. *Interact Cardiovasc Thorac Surg* 2005;4(6):583-7. doi: 10.1510/icvts.2005.111807 [published Online First: 2007/08/03]
27. Marasco SF, Davies AR, Cooper J, et al. Prospective randomized controlled trial of operative rib fixation in traumatic flail chest. *Journal of the American College of Surgeons* 2013;216(5):924-32. doi: <http://dx.doi.org/10.1016/j.jamcollsurg.2012.12.024>
28. Balci AE, Eren S, Cakir O, et al. Open fixation in flail chest: Review of 64 patients. *Asian Cardiovascular and Thoracic Annals* 2004;12(1):11-15.
29. Karcz DV. Operative management of the flail chest. *Wiadomosci lekarskie (Warsaw, Poland : 1960)* 1997;50 Suppl 1 Pt 2:205-8. [published Online First: 1997/01/01]
30. Kim M, Brutus P, Christides C, et al. [Compared results of flail chests treatments : standard internal pneumatic stabilization, new technics of assisted ventilation, osteosynthesis (author's transl)]. *Journal de chirurgie* 1981;118(8-9):499-503. [published Online First: 1981/09/01]
31. Nirula R, Allen B, Layman R, et al. Rib fracture stabilization in patients sustaining blunt chest injury. *American Surgeon* 2006;72(4):307-09.
32. TENG Ji-ping CY-g, NI Da, et al. Outcomes of traumatic flail chest treated by operative fixation versus conservative approach. *Journal of Shanghai Jiaotong university (Medical Science)* 2009;29(12):1495.
33. Voggenreiter G, Neudeck F, Aufmkolk M, et al. Operative chest wall stabilization in flail chest--outcomes of patients with or without pulmonary contusion. *J Am Coll Surg* 1998;187(2):130-8. [published Online First: 1998/08/15]
34. Althausen PL, Shannon S, Watts C, et al. Early surgical stabilization of flail chest with locked plate fixation. *J Orthop Trauma* 2011;25(11):641-7. doi: <http://dx.doi.org/10.1097/BOT.0b013e318234d479>
35. Ahmed Z, Mohyuddin Z. Management of flail chest injury: Internal fixation versus endotracheal intubation and ventilation. *Journal of Thoracic and Cardiovascular Surgery* 1995;110(6):1676-80. doi: <http://dx.doi.org/10.1016/S0022-5223%2895%2970030-7>
36. Defreest L, Tafen M, Bhakta A, et al. Open reduction and internal fixation of rib fractures in polytrauma patients with flail chest. *American Journal of Surgery* 2016;211(4):761-67. doi: <http://dx.doi.org/10.1016/j.amjsurg.2015.11.014>

- 1  
2  
3 37. Doben AR, Eriksson EA, Denlinger CE, et al. Surgical rib fixation for flail chest deformity  
4 improves liberation from mechanical ventilation. *Journal of Critical Care*  
5 2014;29(1):139-43. doi: <http://dx.doi.org/10.1016/j.jcrc.2013.08.003>  
6  
7 38. Granhed HP, Pazooki D. A feasibility study of 60 consecutive patients operated for  
8 unstable thoracic cage. *J Trauma Manag Outcomes* 2014;8(1):20. doi:  
9 10.1186/s13032-014-0020-z [published Online First: 2015/02/03]  
10  
11 39. Jayle CP, Allain G, Ingrand P, et al. Flail chest in polytraumatized patients: surgical  
12 fixation using Stracos reduces ventilator time and hospital stay. *BioMed Research*  
13 *International* 2015;2015:624723. doi: <http://dx.doi.org/10.1155/2015/624723>  
14  
15 40. Majercik S, Wilson E, Gardner S, et al. In-hospital outcomes and costs of surgical  
16 stabilization versus nonoperative management of severe rib fractures. *Journal of*  
17 *Trauma and Acute Care Surgery* 2015;79(4):533-39. doi:  
18 <http://dx.doi.org/10.1097/TA.0000000000000820>  
19  
20 41. Xu JQ, Qiu PL, Yu RG, et al. Better short-term efficacy of treating severe flail chest with  
21 internal fixation surgery compared with conservative treatments. *European Journal of*  
22 *Medical Research* 2015;24 doi: <http://dx.doi.org/10.1186/s40001-015-0146-0>  
23  
24 42. Zhang Y, Tang X, Xie H, et al. Comparison of surgical fixation and nonsurgical  
25 management of flail chest and pulmonary contusion. *American Journal of Emergency*  
26 *Medicine* 2015;33(7):937-40. doi: <http://dx.doi.org/10.1016/j.ajem.2015.04.005>  
27  
28 43. Wada T, Yasunaga H, Inokuchi R, et al. Effectiveness of surgical rib fixation on  
29 prolonged mechanical ventilation in patients with traumatic rib fractures: A propensity  
30 score-matched analysis. *Journal of Critical Care* 2015;30(6):1227-31. doi:  
31 <http://dx.doi.org/10.1016/j.jcrc.2015.07.027>  
32  
33 44. Higgins JPT, Green, S. *Cochrane Handbook for Systematic Reviews of*  
34 *Interventions* 2011.  
35  
36 45. Nickerson TP, Kim BD, Zielinski MD, et al. Use of a 90degree drill and screwdriver for rib  
37 fracture stabilization. *World journal of surgery* 2015;39(3):789-93. doi:  
38 <http://dx.doi.org/10.1007/s00268-014-2862-y>  
39  
40 46. Borrelly J, Aazami MH. New insights into the pathophysiology of flail segment: The  
41 implications of anterior serratus muscle in parietal failure. *European Journal of*  
42 *Cardio-thoracic Surgery* 2005;28(5):742-49. doi:  
43 <http://dx.doi.org/10.1016/j.ejcts.2005.08.017>  
44  
45 47. Ohresser P, Amoros JF, Leonardelli M, et al. [The functional sequelae of closed thoracic  
46 injuries (apropos of 92 cases)]. *Le Poumon et le coeur* 1972;28(3):145-50. [published  
47 Online First: 1972/01/01]  
48  
49 48. Richardson JD, Franklin GA, Heffley S, et al. Operative fixation of chest wall fractures:  
50 An underused procedure? *American Surgeon* 2007;73(6):591-96.  
51  
52 49. Campbell N, Conaglen P, Martin K, et al. Surgical stabilization of rib fractures using inion  
53 OTFS wraps-techniques and quality of life follow-up. *Journal of Trauma - Injury,*  
54 *Infection and Critical Care* 2009;67(3):596-601. doi:  
55 <http://dx.doi.org/10.1097/TA.0b013e3181ad8cb7>  
56  
57 50. Barajas PMD, Otero MDP, Sanchez-Gracian CD, et al. Surgical fixation of rib fractures  
58 with clips and titanium bars (STRATOS (TM) System). Preliminary experience.  
59 *Cirugia Espanola* 2010;88(3):180-86. doi: 10.1016/j.ciresp.2010.06.004  
60  
61 51. Mayberry JC, Kroeker AD, Ham LB, et al. Long-Term Morbidity, Pain, and Disability after  
62 Repair of Severe Chest Wall Injuries. *Am Surg* 2009;75(5):389-94.  
63  
64 52. Gasparri MG, Almassi GH, Haasler GB. Surgical management of multiple rib fractures.  
65 *Chest* 2003;124(4):295S-96S.  
66  
67 53. Cacchione RN, Richardson JD, Seligson D. Painful nonunion of multiple rib fractures  
68 managed by operative stabilization. *Journal of Trauma - Injury, Infection and Critical*  
69 *Care* 2000;48(2):319-21.  
70  
71 54. Garner P, Hopewell S, Chandler J, et al. When and how to update systematic reviews:  
72 consensus and checklist. *BMJ* 2016;354 doi: 10.1136/bmj.i3507  
73  
74 55. Lund H, Juhl C, Christensen R. Systematic reviews and research waste. *The*  
75 *Lancet*;387(10014):123-24. doi: 10.1016/S0140-6736(15)01354-9  
76  
77  
78  
79  
80

- 1  
2  
3 56. Booth A, Clarke M, Dooley G, et al. The nuts and bolts of PROSPERO: an international  
4 prospective register of systematic reviews. *Systematic Reviews* 2012;1:2-2. doi:  
5 10.1186/2046-4053-1-2  
6 57. Moher D, Booth A, Stewart L. How to reduce unnecessary duplication: use PROSPERO.  
7 *BJOG: An International Journal of Obstetrics & Gynaecology* 2014;121(7):784-86.  
8 doi: 10.1111/1471-0528.12657  
9 58. EMSurg Collaborators. Methodological overview of systematic reviews to establish the  
10 evidence base for emergency general surgery. *Br J Surg* 2017;104(5):513-24. doi:  
11 10.1002/bjs.10476 [published Online First: 2017/03/16]  
12 59. Higgins JPT, Thompson SG, Deeks JJ, et al. Measuring inconsistency in meta-analyses.  
13 *BMJ : British Medical Journal* 2003;327(7414):557-60.  
14 60. Featherstone RM, Dryden DM, Foisy M, et al. Advancing knowledge of rapid reviews: an  
15 analysis of results, conclusions and recommendations from published review articles  
16 examining rapid reviews. *Syst Rev* 2015;4:50. doi: 10.1186/s13643-015-0040-4  
17 [published Online First: 2015/05/01]  
18  
19  
20  
21  
22  
23  
24  
25  
26  
27  
28  
29  
30  
31  
32  
33  
34  
35  
36  
37  
38  
39  
40  
41  
42  
43  
44  
45  
46  
47  
48  
49  
50  
51  
52  
53  
54  
55  
56  
57  
58  
59  
60

## SUPPORTING INFORMATION CAPTIONS

Fig1 PRISMA Flow diagram

Table 1 Review characteristics

Table 2 Primary studies included in each review and the number of included patients

Table 3 Risk of bias using ROBIS tool

Table 4 Results of individual reviews that report a meta-analysis for flail chest

**Table 5 Results of individual reviews that report a narrative synthesis for flail chest**

Table 6 Results of individual reviews that report a narrative synthesis for multiple rib fractures

S Appendix 1 Medline search strategy

S Appendix 2 Excluded studies

1  
2  
3  
4  
5  
6  
7  
8  
9  
10  
11  
12  
13  
14  
15  
16  
17  
18  
19  
20  
21  
22  
23  
24  
25  
26  
27  
28  
29  
30  
31  
32  
33  
34  
35  
36  
37  
38  
39  
40  
41  
42  
43  
44  
45  
46  
47  
48  
49  
50  
51  
52  
53  
54  
55  
56  
57  
58  
59  
60

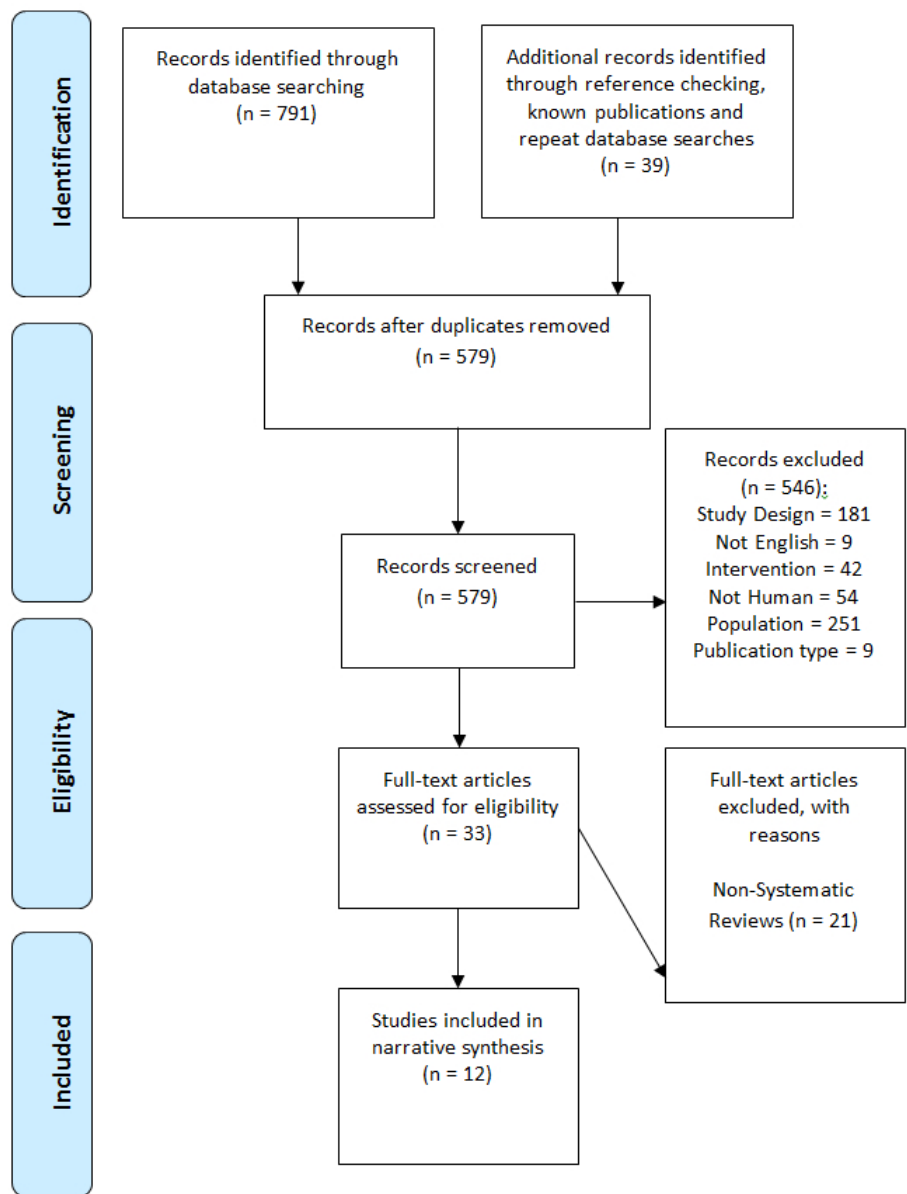

PRISMA Flow diagram

174x225mm (96 x 96 DPI)



**Additional file 1 MEDLINE search strategy (OVID interface)**

1. (rib adj3 fracture\*).mp. [mp=title, abstract, original title, name of substance word, subject heading word, keyword heading word, protocol supplementary concept word, rare disease supplementary concept word, unique identifier]
2. ((flail chest or stove? in) adj3 chest).mp. [mp=title, abstract, original title, name of substance word, subject heading word, keyword heading word, protocol supplementary concept word, rare disease supplementary concept word, unique identifier]
3. (blunt chest adj3 trauma).mp. [mp=title, abstract, original title, name of substance word, subject heading word, keyword heading word, protocol supplementary concept word, rare disease supplementary concept word, unique identifier]
4. extra thoracic injur\*.mp. [mp=title, abstract, original title, name of substance word, subject heading word, keyword heading word, protocol supplementary concept word, rare disease supplementary concept word, unique identifier]
5. costal fracture\*.mp. [mp=title, abstract, original title, name of substance word, subject heading word, keyword heading word, protocol supplementary concept word, rare disease supplementary concept word, unique identifier]
6. Flail Chest/
7. Rib Fractures/
8. 1 or 2 or 3 or 4 or 5 or 6 or 7
9. (fracture\* adj3 fixation).mp. [mp=title, abstract, original title, name of substance word, subject heading word, keyword heading word, protocol supplementary concept word, rare disease supplementary concept word, unique identifier]
10. bone screw\*.mp. [mp=title, abstract, original title, name of substance word, subject heading word, keyword heading word, protocol supplementary concept word, rare disease supplementary concept word, unique identifier]
11. Bone plate\*.mp. [mp=title, abstract, original title, name of substance word, subject heading word, keyword heading word, protocol supplementary concept word, rare disease supplementary concept word, unique identifier]



1  
2  
3  
4  
5  
6  
7  
8  
9  
10  
11  
12  
13  
14  
15  
16  
17  
18  
19  
20  
21  
22  
23  
24  
25  
26  
27  
28  
29  
30  
31  
32  
33  
34  
35  
36  
37  
38  
39  
40  
41  
42  
43  
44  
45  
46  
47  
48  
49  
50  
51  
52  
53  
54  
55  
56  
57  
58  
59  
60

12. (suture adj3 fixation).mp. [mp=title, abstract, original title, name of substance word, subject heading word, keyword heading word, protocol supplementary concept word, rare disease supplementary concept word, unique identifier]

13. judet strut.mp. [mp=title, abstract, original title, name of substance word, subject heading word, keyword heading word, protocol supplementary concept word, rare disease supplementary concept word, unique identifier]

14. bioabsorbable plate\*.mp. [mp=title, abstract, original title, name of substance word, subject heading word, keyword heading word, protocol supplementary concept word, rare disease supplementary concept word, unique identifier]

15. heavy suture\*.mp. [mp=title, abstract, original title, name of substance word, subject heading word, keyword heading word, protocol supplementary concept word, rare disease supplementary concept word, unique identifier]

16. intramedullary splint\*.mp. [mp=title, abstract, original title, name of substance word, subject heading word, keyword heading word, protocol supplementary concept word, rare disease supplementary concept word, unique identifier]

17. (metal adj2 fixation).mp. [mp=title, abstract, original title, name of substance word, subject heading word, keyword heading word, protocol supplementary concept word, rare disease supplementary concept word, unique identifier]

18. ((plate\* or strut) adj3 fixation\*).mp. [mp=title, abstract, original title, name of substance word, subject heading word, keyword heading word, protocol supplementary concept word, rare disease supplementary concept word, unique identifier]

19. exp Internal Fixators/

20. fracture fixation/ or fracture fixation, internal/ or fracture fixation, intramedullary/

21. (fracture adj3 stabilisation).mp. [mp=title, abstract, original title, name of substance word, subject heading word, keyword heading word, protocol supplementary concept word, rare disease supplementary concept word, unique identifier]

22. 10 or 11 or 12 or 13 or 14 or 15 or 16 or 17 or 18 or 19 or 20 or 21

1  
2  
3 23. 8 and 22  
4

5 24. limit 23 to (humans and yr="1976 -Current")  
6  
7  
8  
9  
10  
11  
12  
13  
14  
15  
16  
17  
18  
19  
20  
21  
22  
23  
24  
25  
26  
27  
28  
29  
30  
31  
32  
33  
34  
35  
36  
37  
38  
39  
40  
41  
42  
43  
44  
45  
46  
47  
48  
49  
50  
51  
52  
53  
54  
55  
56  
57  
58  
59  
60

For peer review only

### Additional content 2 Excluded studies with reasons given for exclusion

|    |                                                                                                                                                                                                                                                              |              |
|----|--------------------------------------------------------------------------------------------------------------------------------------------------------------------------------------------------------------------------------------------------------------|--------------|
| 1  | Galan G, Penalver JC, Paris F, et al. BLUNT CHEST INJURIES IN 1696 PATIENTS. <i>Eur J Cardiothorac Surg.</i> 1992; 6: 284-7.                                                                                                                                 | Study Design |
| 2  | Actis Dato GM, Aidala E and Ruffini E. Surgical management of flail chest. <i>Ann Thorac Surg.</i> 1999; 67: 1826-7.                                                                                                                                         | Study Design |
| 3  | Ahmed Z and Mohyuddin Z. Management of flail chest injury: Internal fixation versus endotracheal intubation and ventilation. <i>Journal of Thoracic and Cardiovascular Surgery.</i> 1995; 110: 1676-80.                                                      | Study Design |
| 4  | Akkus M, Utkusavas A, Hanozu M, Kaya M and Bakir I. Stabilization of Flail Chest and Fractured Sternum by Minimally Invasive Repair of Pectus Excavatum. <i>Thoracic and Cardiovascular Surgeon Reports.</i> 2015; 4: 11-3.                                  | Study Design |
| 5  | Althausen PL, Shannon S, Watts C, et al. Early surgical stabilization of flail chest with locked plate fixation. <i>J Orthop Trauma.</i> 2011; 25: 641-7.                                                                                                    | Study Design |
| 6  | Ananiadou O, Karaiskos T, Givissis P and Drossos G. Operative stabilization of skeletal chest injuries secondary to cardiopulmonary resuscitation in a cardiac surgical patient. <i>Interact Cardiovasc Thorac Surg.</i> 2010; 10: 478-80.                   | Study Design |
| 7  | Attia RQ, Schulte KL and Whitaker DC. eReply: In patients with acute flail chest does surgical rib fixation improve outcomes in terms of morbidity and mortality? <i>Interactive Cardiovascular and Thoracic Surgery.</i> 2016; 23: 319-20.                  | Study Design |
| 8  | Bailey J, VanderHeiden T, Burlew CC, et al. Thoracic hyperextension injury with complete "bony disruption" of the thoracic cage: Case report of a potentially life-threatening injury. <i>World Journal of Emergency Surgery.</i> 2012; 7.                   | Study Design |
| 9  | Beelen R, Rumbaut J and De Geest R. Surgical stabilization of a rib fracture using an angle stable plate. <i>Journal of Trauma - Injury, Infection and Critical Care.</i> 2007; 63: 1159-60.                                                                 | Study Design |
| 10 | Beltrami V, Martinelli G, Giansante P and Gentile K. An original technique for surgical stabilisation of traumatic flail chest. <i>Thorax.</i> 1978; 33: 528-9.                                                                                              | Study Design |
| 11 | Berthet JP, Solovei L, Tiffet O, et al. Chest-wall reconstruction in case of infection of the operative site: Is there any interest in titanium rib osteosynthesis. <i>Eur J Cardiothorac Surg.</i> 2013; 44: 866-74.                                        | Study Design |
| 12 | Bibas BJ and Bibas RA. Operative stabilization of flail chest using a prosthetic mesh and methylmethacrylate. <i>Eur J Cardiothorac Surg.</i> 2006; 29: 1064-6.                                                                                              | Study Design |
| 13 | Bille A, Okiror L, Campbell A, Simons J and Routledge T. Evaluation of long-term results and quality of life in patients who underwent rib fixation with titanium devices after trauma. <i>General Thoracic and Cardiovascular Surgery.</i> 2013; 61: 345-9. | Study Design |

|    |                                                                                                                                                                                                                                              |              |
|----|----------------------------------------------------------------------------------------------------------------------------------------------------------------------------------------------------------------------------------------------|--------------|
| 14 | Bille A, Okiror L, Karenovics W and Routledge T. Experience with titanium devices for rib fixation and coverage of chest wall defects. <i>Interactive Cardiovascular and Thoracic Surgery</i> . 2012; 15: 588-95.                            | Study Design |
| 15 | Bonne SL, Turnbull IR and Southard RE. Technique for repair of fractures and separations involving the cartilaginous portions of the anterior chest wall. <i>Chest</i> . 2015; 147: e199-e204.                                               | Study Design |
| 16 | Borrelly J and Aazami MH. New insights into the pathophysiology of flail segment: The implications of anterior serratus muscle in parietal failure. <i>Eur J Cardiothorac Surg</i> . 2005; 28: 742-9.                                        | Study Design |
| 17 | Bottlang M, Long WB, Phelan D, Fielder D and Madey SM. Surgical stabilization of flail chest injuries with MatrixRIB implants: A prospective observational study. <i>Injury</i> . 2013; 44: 232-8.                                           | Study Design |
| 18 | Brotzu G, Montisci R, Pillai W and Sanna S. Chest injuries. A review of 195 patients. <i>Ann Chir Gynaecol</i> . 1988; 77: 155-9.                                                                                                            | Study Design |
| 19 | Buyukkarabacak YB, Sengul AT, Celik B, et al. The Usefulness of Early Surgical Rib Stabilization in Flail Chest. <i>Acta Chir Belg</i> . 2015; 115: 408-13.                                                                                  | Study Design |
| 20 | Cacchione RN, Richardson JD and Seligson D. Painful nonunion of multiple rib fractures managed by operative stabilization. <i>Journal of Trauma - Injury, Infection and Critical Care</i> . 2000; 48: 319-21.                                | Study Design |
| 21 | Campbell N, Conaglen P, Martin K and Antippa P. Surgical stabilization of rib fractures using inion OTPS wraps-techniques and quality of life follow-up. <i>Journal of Trauma - Injury, Infection and Critical Care</i> . 2009; 67: 596-601. | Study Design |
| 22 | Caragounis EC, Olsen MF, Pazooki D and Granhed H. Surgical treatment of multiple rib fractures and flail chest in trauma: a one-year follow-up study. <i>World Journal of Emergency Surgery</i> . 2016; 11.                                  | Study Design |
| 23 | Chapman BC, Herbert B, Rodil M, et al. RibScore: A novel radiographic score based on fracture pattern that predicts pneumonia, respiratory failure, and tracheostomy. <i>J Trauma Acute Care Surg</i> . 2016; 80: 95-101.                    | Study Design |
| 24 | Charafeddine AH, Stone ME, Reddy SH, Teperman SH, Kaban JM and Cohen-Levy WB. Anterior chest wall disassociation: A pattern associated with serious underlying injury. <i>Am Surg</i> . 2015; 81: E244-E5.                                   | Study Design |
| 25 | Cho YH, Kim HK, Kang DY and Choi YH. Reoperative surgical stabilization of a painful nonunited rib fracture using bone grafting and a metal plate. <i>J Orthop Trauma</i> . 2009; 23: 605-6.                                                 | Study Design |
| 26 | De La Santa Barajas PM, Polo Otero MD, Delgado Sanchez- Gracian C, Leal Ruiloba S, Trinidad C and Choren Duran M. Surgical treatment for flail chest. <i>Interactive Cardiovascular and Thoracic Surgery</i> . 2012; 15: S5.                 | Study Design |
| 27 | De Moya M, Bramos T, Agarwal S, et al. Pain as an indication for rib fixation: A bi-institutional pilot study. <i>Journal of Trauma -</i>                                                                                                    | Study Design |

|    |                                                                                                                                                                                                                                              |              |
|----|----------------------------------------------------------------------------------------------------------------------------------------------------------------------------------------------------------------------------------------------|--------------|
|    | Injury, Infection and Critical Care. 2011; 71: 1750-4.                                                                                                                                                                                       |              |
| 28 | de Palma A, Sollitto F, Loizzi D, et al. Chest wall stabilization and reconstruction: Short and long-term results 5 years after the introduction of a new titanium plates system. Journal of Thoracic Disease. 2016; 8: 490-8.               | Study Design |
| 29 | Dean NC, Van Boerum DH and Liou TG. Rib plating of acute and sub-acute non-union rib fractures in an adult with cystic fibrosis: a case report. BMC Res Notes. 2014; 7: 681.                                                                 | Study Design |
| 30 | Defreest L, Tafen M, Bhakta A, et al. Open reduction and internal fixation of rib fractures in polytrauma patients with flail chest. Am J Surg. 2016; 211: 761-7.                                                                            | Study Design |
| 31 | Dehghan N, de Mestral C, McKee MD, Schemitsch EH and Nathens A. Flail chest injuries: A review of outcomes and treatment practices from the National Trauma Data Bank. Journal of Trauma and Acute Care Surgery. 2014; 76: 462-8.            | Study Design |
| 32 | Doben AR, Eriksson EA, Denlinger CE, et al. Surgical rib fixation for flail chest deformity improves liberation from mechanical ventilation. J Crit Care. 2014; 29: 139-43.                                                                  | Study Design |
| 33 | Dunlop RLE, Tiong W, Veerasingam D and Kelly JL. Novel use of hand fracture fixation plates in the surgical stabilisation of flail chest. Journal of Plastic, Reconstructive and Aesthetic Surgery. 2010; 63: e51-e3.                        | Study Design |
| 34 | Engel C, Krieg JC, Madey SM, Long WB and Bottlang M. Operative chest wall fixation with osteosynthesis plates. Journal of Trauma - Injury, Infection and Critical Care. 2005; 58: 181-6.                                                     | Study Design |
| 35 | Evman S, Kolbas I, Dogruyol T and Tezel C. A Case of Traumatic Flail Chest Requiring Stabilization with Surgical Reconstruction. Thoracic and Cardiovascular Surgeon Reports. 2015; 4: 8-10.                                                 | Study Design |
| 36 | Fagevik Olsén M, Pazooki D and Granhed H. Recovery after stabilising surgery for 'flail chest'. Unfallchirurgie. 2013; 39: 501-6.                                                                                                            | Study Design |
| 37 | Farquhar J, Almahrabi Y, Slobogean G, et al. No benefit to surgical fixation of flail chest injuries compared with modern comprehensive management: results of a retrospective cohort study. Canadian Journal of Surgery. 2016; 59: 299-303. | Study Design |
| 38 | Flagel BT, Luchette FA, Reed RL, et al. Half-a-dozen ribs: the breakpoint for mortality. Surgery. 2005; 138: 717-23; discussion 23-5.                                                                                                        | Study Design |
| 39 | Gabram SGA, Devanney J, Jones D and Jacobs LM. Delayed hemorrhagic pericardial effusion: Case reports of a complication from severe blunt chest trauma. Journal of Trauma. 1992; 32: 794-800.                                                | Study Design |
| 40 | Galvin IF, Costa R and Murton M. FRACTURED RIB WITH PENETRATING CARDIOPULMONARY INJURY. Ann Thorac Surg. 1993; 56: 558-9.                                                                                                                    | Study Design |

|    |                                                                                                                                                                                                                                                                          |              |
|----|--------------------------------------------------------------------------------------------------------------------------------------------------------------------------------------------------------------------------------------------------------------------------|--------------|
| 41 | Gardenbroek TJ, Bemelman M and Leenen LPH. Pseudarthrosis of the ribs treated with a locking compression plate: A report of three cases. <i>Journal of Bone and Joint Surgery - Series A</i> . 2009; 91: 1477-9.                                                         | Study Design |
| 42 | Gasparri MG, Almassi GH and Haasler GB. Surgical management of multiple rib fractures. <i>Chest</i> . 2003; 124: 295S-6S.                                                                                                                                                | Study Design |
| 43 | George RJ and Stern HS. An approach to surgical fixation of traumatic costosternal diastasis. <i>ANZ J Surg</i> . 2014; 84: 594-5.                                                                                                                                       | Study Design |
| 44 | Gerov I and Yablanski V. Damage control - Increasing the survival rates through emergency bone stabilization in a polytraumatized young patient. <i>Injury</i> . 2011; 42: S29.                                                                                          | Study Design |
| 45 | Ginsberg RJ and Kostin RF. 5. New approaches to the management of flail chest. <i>Can Med Assoc J</i> . 1977; 116: 613-5.                                                                                                                                                | Study Design |
| 46 | Govaert G, Schuetz M and Peters P. Rib fixation for a traumatic 'stove-in chest': An option to consider. <i>ANZ J Surg</i> . 2012; 82: 276-7.                                                                                                                            | Study Design |
| 47 | Granetzny A, Abd El-Aal M, Emam E, Shalaby A and Boseila A. Surgical versus conservative treatment of flail chest. Evaluation of the pulmonary status. <i>Interact Cardiovasc Thorac Surg</i> . 2005; 4: 583-7.                                                          | Study Design |
| 48 | Granhed HP and Pazooki D. A feasibility study of 60 consecutive patients operated for unstable thoracic cage. <i>J Trauma Manag Outcomes</i> . 2014; 8: 20.                                                                                                              | Study Design |
| 49 | Guernelli N, Bragaglia RB, Briccoli A, Mastroilli M and Vecchi R. Technique for the management of anterior flail chest. <i>Thorax</i> . 1979; 34: 247-8.                                                                                                                 | Study Design |
| 50 | Gunn JM, Savola J and Isotalo K. Left-sided diaphragmatic and pericardial ruptures with subluxation of the heart after blunt trauma. <i>Ann Thorac Surg</i> . 2012; 93: 317-9.                                                                                           | Study Design |
| 51 | Haasler GB. Open fixation of flail chest after blunt trauma. <i>Ann Thorac Surg</i> . 1990; 49: 993-5.                                                                                                                                                                   | Study Design |
| 52 | Hasenboehler EA, Bernard AC, Bottiggi AJ, et al. Treatment of traumatic flail chest with muscular sparing open reduction and internal fixation: Description of a surgical technique. <i>Journal of Trauma - Injury, Infection and Critical Care</i> . 2011; 71: 494-501. | Study Design |
| 53 | Hellberg K, de Vivie ER, Fuchs K, et al. Stabilization of flail chest by compression osteosynthesis--experimental and clinical results. <i>Thorac Cardiovasc Surg</i> . 1981; 29: 275-81.                                                                                | Study Design |
| 54 | Igai H, Kamiyoshihara M, Nagashima T and Ohtaki Y. Rib fixation for severe chest deformity due to multiple rib fractures. <i>Annals of Thoracic and Cardiovascular Surgery</i> . 2012; 18: 458-61.                                                                       | Study Design |
| 55 | Ivancic A, Saftic I, Cicvaric T, et al. Initial experience with external thoracic stabilization by the "figure of eight" osteosynthesis in                                                                                                                               | Study Design |

|    |                                                                                                                                                                                                                                             |              |
|----|---------------------------------------------------------------------------------------------------------------------------------------------------------------------------------------------------------------------------------------------|--------------|
|    | polytraumatized patients with flail chest injury. <i>Coll Antropol.</i> 2009; 33: 51-6.                                                                                                                                                     |              |
| 56 | Jayle CP, Allain G, Ingrand P, et al. Flail chest in polytraumatized patients: surgical fixation using Stracos reduces ventilator time and hospital stay. <i>Biomed Res Int.</i> 2015; 2015: 624723.                                        | Study Design |
| 57 | Kamiyoshihara M, Nagashima T, Ibe T and Takeyoshi I. Rupture of the diaphragm and pericardium with cardiac herniation after blunt chest trauma. <i>General Thoracic and Cardiovascular Surgery.</i> 2010; 58: 291-4.                        | Study Design |
| 58 | Kaplan T, Gulbahar G, Gundogdu AG and Han S. An unexpected complication of titanium rib clips. <i>Ann Thorac Surg.</i> 2014; 98: 2206-9.                                                                                                    | Study Design |
| 59 | Ke S, Duan H, Cai Y, Kang J and Feng Z. Thoracoscopy-assisted minimally invasive surgical stabilization of the anterolateral flail chest using Nuss bars. <i>Ann Thorac Surg.</i> 2014; 97: 2179-82.                                        | Study Design |
| 60 | Khandelwal G, Mathur RK, Shukla S and Maheshwari A. A prospective single center study to assess the impact of surgical stabilization in patients with rib fracture. <i>Int J Surg.</i> 2011; 9: 478-81.                                     | Study Design |
| 61 | Kilic D, Findikcioglu A, Akin S, et al. Factors affecting morbidity and mortality in flail chest: Comparison of anterior and lateral location. <i>Thoracic and Cardiovascular Surgeon.</i> 2011; 59: 45-8.                                  | Study Design |
| 62 | Kim JJ, Kim YH, Moon SW, Choi SY and Jeong SC. Nuss procedure for severe flail chest after blunt trauma. <i>Ann Thorac Surg.</i> 2015; 99: e25-7.                                                                                           | Study Design |
| 63 | Konstantinov IE, Saxena P and Wood DJ. Stabilisation of chronic flail chest: A novel approach of surgical fixation and osteogenesis. <i>Thorax.</i> 2009; 64: 265-6.                                                                        | Study Design |
| 64 | Kruger M, Zinne N, Zhang RY, et al. Multidirectional Thoracic Wall Stabilization: A New Device on the Scene. <i>Ann Thorac Surg.</i> 2013; 96: 1846-9.                                                                                      | Study Design |
| 65 | Kulaylat AN, Chesnut CH, 3rd, Santos AP and Armen SB. Successful operative rib fixation of traumatic flail chest in a patient with osteogenesis imperfecta. <i>Interact Cardiovasc Thorac Surg.</i> 2014; 19: 518-9.                        | Study Design |
| 66 | Landreneau RJ, Hinson Jr JM, Hazelrigg SR, Johnson JA, Boley TM and Curtis JJ. Strut fixation of an extensive flail chest. <i>Ann Thorac Surg.</i> 1991; 51: 473-5.                                                                         | Study Design |
| 67 | Lang M, Krumrey MT, Roder J, Ulmer J, Friederichs J and Buhren V. Late complications following blunt abdominal and thoracic trauma: Two case reports of a minimally invasive therapy. [German, English]. <i>Chirurg.</i> 2012; 83: 1078-81. | Study Design |
| 68 | Lang-Lazdunski L, Bonnet PM, Pons F, Brinquin L and Jancovici R. Traumatic extrathoracic lung herniation. <i>Ann Thorac Surg.</i>                                                                                                           | Study Design |



|    |                                                                                                                                                                                                                                                                                                 |              |
|----|-------------------------------------------------------------------------------------------------------------------------------------------------------------------------------------------------------------------------------------------------------------------------------------------------|--------------|
|    | 2002; 74: 927-9.                                                                                                                                                                                                                                                                                |              |
| 69 | Lanier ST, Wetterau M, Smith-Singares E, et al. Management of pulmonary hernia through a flail segment in closed thoracic trauma using open reduction, internal fixation and pectoralis major flap reconstruction: A case report. <i>Canadian Journal of Plastic Surgery</i> . 2011; 19: 145-7. | Study Design |
| 70 | Lardinois D, Krueger T, Dusmet M, Ghisletta N, Gugger M and Ris HB. Pulmonary function testing after operative stabilisation of the chest wall for flail chest. <i>Eur J Cardiothorac Surg</i> . 2001; 20: 496-501.                                                                             | Study Design |
| 71 | Lee SA, Hwang JJ, Chee HK, Kim YH and Lee WS. Flail chest stabilization with Nuss operation in presence of multiple myeloma. <i>Journal of Thoracic Disease</i> . 2014; 6: E43-E7.                                                                                                              | Study Design |
| 72 | Lee SK and Kang DK. Nuss procedure for surgical stabilization of flail chest with horizontal sternal body fracture and multiple bilateral rib fractures. <i>Journal of Thoracic Disease</i> . 2016; 8: E390-E2.                                                                                 | Study Design |
| 73 | Lee SY, Lee SJ, Lee CS and Lee KR. Spontaneous fractures of judet struts. <i>Journal of Trauma - Injury, Infection and Critical Care</i> . 2009; 67: 214.                                                                                                                                       | Study Design |
| 74 | Leenstra BS, Stolwijk A and Poeze M. Surgical stabilisation in a 13-year-old boy with traumatic flail chest. <i>BMJ Case Rep</i> . 2015; 2015 (no pagination).                                                                                                                                  | Study Design |
| 75 | Majercik S, Cannon Q, Granger SR, Van Boerum DH and White TW. Regarding: Long-term patient outcomes after surgical stabilization of rib fractures. <i>Am J Surg</i> . 2015; 210: 199-200.                                                                                                       | Study Design |
| 76 | Majercik S, Cannon Q, Granger SR, Vanboerum DH and White TW. Long-term patient outcomes after surgical stabilization of rib fractures. <i>Am J Surg</i> . 2014; 208: 88-92.                                                                                                                     | Study Design |
| 77 | Majercik S, Vijayakumar S, Olsen G, et al. Surgical stabilization of severe rib fractures decreases incidence of retained hemothorax and empyema. <i>Am J Surg</i> . 2015; 210: 1112-7.                                                                                                         | Study Design |
| 78 | Marasco S, Cooper J, Pick A and Kossmann T. Pilot study of operative fixation of fractured ribs in patients with flail chest. <i>ANZ J Surg</i> . 2009; 79: 804-8.                                                                                                                              | Study Design |
| 79 | Marasco S, Liew S, Edwards E, Varma D and Summerhayes R. Analysis of bone healing in flail chest injury: Do we need to fix both fractures per rib? <i>Journal of Trauma and Acute Care Surgery</i> . 2014; 77: 452-8.                                                                           | Study Design |
| 80 | Marasco S, Quayle M, Summerhayes R, Sutalo ID and Liovic P. An assessment of outcomes with intramedullary fixation of fractured ribs. <i>J Cardiothorac Surg</i> . 2016; 11.                                                                                                                    | Study Design |



|    |                                                                                                                                                                                                                                                      |              |
|----|------------------------------------------------------------------------------------------------------------------------------------------------------------------------------------------------------------------------------------------------------|--------------|
| 81 | Marasco SF, Davies AR, Cooper J, et al. Prospective randomized controlled trial of operative rib fixation in traumatic flail chest. <i>J Am Coll Surg.</i> 2013; 216: 924-32.                                                                        | Study Design |
| 82 | Maury JM, Roquet G, Marcotte G and David JS. Surgical fixation of rib fractures in chest wall trauma. <i>Intensive Care Med.</i> 2015; 41: 1483-4.                                                                                                   | Study Design |
| 83 | Maxwell CA, Mion LC and Dietrich MS. Hospitalized injured older adults: clinical utility of a rib fracture scoring system. <i>J Trauma Nurs.</i> 2012; 19: 168-74; quiz 75-6.                                                                        | Study Design |
| 84 | Mayberry JC, Ham LB, Schipper PH, Ellis TJ and Mullins RJ. Surveyed opinion of American trauma, orthopedic, and thoracic surgeons on rib and sternal fracture repair. <i>J Trauma.</i> 2009; 66: 875-9.                                              | Study Design |
| 85 | Mayberry JC, Kroeker AD, Ham LB, Mullins RJ and Trunkey DD. Long-Term Morbidity, Pain, and Disability after Repair of Severe Chest Wall Injuries. <i>Am Surg.</i> 2009; 75: 389-94.                                                                  | Study Design |
| 86 | Mayberry JC, Terhes JT, Ellis TJ, Wanek S and Mullins RJ. Absorbable Plates for Rib Fracture Repair: Preliminary Experience. <i>Journal of Trauma - Injury, Infection and Critical Care.</i> 2003; 55: 835-9.                                        | Study Design |
| 87 | Menard A, Testart J, Philippe JM and Grise P. TREATMENT OF FLAIL CHEST WITH JUDET STRUTS. <i>Journal of Thoracic and Cardiovascular Surgery.</i> 1983; 86: 300-5.                                                                                    | Study Design |
| 88 | Messing JA, Gall V and Sarani B. Successful management of severe flail chest via early operative intervention. <i>J Trauma Nurs.</i> 2014; 21: 83-5.                                                                                                 | Study Design |
| 89 | Metin B and Intepe YS. Operative ease and efficiency of nitinol memory rib plaque on the multiple costa and sternum fractures: Three-year clinical experience. <i>International Journal of Clinical and Experimental Medicine.</i> 2016; 9: 11510-7. | Study Design |
| 90 | Michelet P and Boussen S. Case scenario - thoracic trauma. <i>Annales Francaises D Anesthesie Et De Reanimation.</i> 2013; 32: 504-9.                                                                                                                | Study Design |
| 91 | Michelitsch C, Acklin YP, Hassig G, Sommer C and Furrer M. Operative stabilisation of chest wall trauma: Single center report of initial management and longterm outcome. <i>Respiration.</i> 2016; 91 (5): 456.                                     | Study Design |
| 92 | Mintz AC, Albano A, Reisdorff EJ, Choe KA and Lillegard W. Stress fracture of the first rib from serratus anterior tension: an unusual mechanism of injury. <i>Ann Emerg Med.</i> 1990; 19: 411-4.                                                   | Study Design |
| 93 | Morodomi Y, Okamoto T, Tagawa T, et al. A novel method of using bioabsorbable materials for the surgical repair of flail chest. <i>Journal of Trauma and Acute Care Surgery.</i> 2016; 81: 984-7.                                                    | Study Design |

|     |                                                                                                                                                                                                                                                                                   |              |
|-----|-----------------------------------------------------------------------------------------------------------------------------------------------------------------------------------------------------------------------------------------------------------------------------------|--------------|
| 94  | Moslam KE, Badawy MS and Asida SM. Evaluation of respiratory functions in chest trauma patients treated with thoracic wall stabilization. <i>Egyptian Journal of Chest Diseases and Tuberculosis</i> . 2015; 64: 213-7.                                                           | Study Design |
| 95  | Mouton W, Lardinois D, Furrer M, Regli B and Ris HB. Long-term follow-up of patients with operative stabilisation of a flail chest. <i>Thorac Cardiovasc Surg</i> . 1997; 45: 242-4.                                                                                              | Study Design |
| 96  | Muhm M, Harter J, Weiss C and Winkler H. Severe trauma of the chest wall: surgical rib stabilisation versus non-operative treatment. <i>European Journal of Trauma and Emergency Surgery</i> . 2013; 39: 257-65.                                                                  | Study Design |
| 97  | Nagaie T, Tateishi H and Minagawa S. New method for the internal stabilisation of flail chest. <i>Eur J Surg</i> . 1992; 158: 613-4.                                                                                                                                              | Study Design |
| 98  | Ng ABY, Giannoudis PV, Bismil Q, Hinsche AF and Smith RM. Operative stabilisation of painful non-united multiple rib fractures. <i>Injury</i> . 2001; 32: 637-9.                                                                                                                  | Study Design |
| 99  | Nickerson TP, Kim BD, Zielinski MD, Jenkins D and Schiller HJ. Use of a 90degree drill and screwdriver for rib fracture stabilization. <i>World J Surg</i> . 2015; 39: 789-93.                                                                                                    | Study Design |
| 100 | Nickerson TP, Thiels CA, Kim BD, Zielinski MD, Jenkins DH and Schiller HJ. Outcomes of Complete Versus Partial Surgical Stabilization of Flail Chest. <i>World J Surg</i> . 2016; 40: 236-41.                                                                                     | Study Design |
| 101 | Nicolau AE, Merlan V, Ciupan R, et al. Postoperative early enteral nutrition in a patient with politrauma and late duodenal perforation. <i>Chirurgia</i> . 2008; 103: 111-5.                                                                                                     | Study Design |
| 102 | Nirula R, Allen B, Layman R, Falimirski ME and Somberg LB. Rib fracture stabilization in patients sustaining blunt chest injury. <i>Am Surg</i> . 2006; 72: 307-9.                                                                                                                | Study Design |
| 103 | Noonan TJ, Sakryd G, Espinoza LM and Packer D. Posterior rib stress fracture in professional baseball pitchers. <i>American Journal of Sports Medicine</i> . 2007; 35: 654-8.                                                                                                     | Study Design |
| 104 | Olsen MF, Sloba M, Klarin L, Caragounis EC, Pazooki D and Granhed H. Physical function and pain after surgical or conservative management of multiple rib fractures - a follow-up study. <i>Scandinavian Journal of Trauma Resuscitation &amp; Emergency Medicine</i> . 2016; 24. | Study Design |
| 105 | Ovadia P, Szewczyk D and Rabinovici R. Bilateral cervical rib fracture secondary to blunt trauma. <i>J Trauma</i> . 1997; 43: 157-8.                                                                                                                                              | Study Design |
| 106 | Oyamatsu H, Ohata N and Narita K. New technique for fixing rib fracture with bioabsorbable plate. <i>Asian Cardiovascular and Thoracic Annals</i> . 2016; 24: 736-8.                                                                                                              | Study Design |
| 107 | Oyazun JR, Bush AP, McCormick JR and Bolanowski PJP. Use of 3.5-mm acetabular reconstruction plates for internal fixation of                                                                                                                                                      | Study Design |

|     |                                                                                                                                                                                                                                                                                                          |              |
|-----|----------------------------------------------------------------------------------------------------------------------------------------------------------------------------------------------------------------------------------------------------------------------------------------------------------|--------------|
|     | flail chest injuries. <i>Ann Thorac Surg.</i> 1998; 65: 1471-4.                                                                                                                                                                                                                                          |              |
| 108 | Pape HC, Remmers D, Rice J, Ebisch M, Krettek C and Tscherne H. Appraisal of early evaluation of blunt chest trauma: Development of a standardized scoring system for initial clinical decision making. <i>Journal of Trauma-Injury Infection and Critical Care.</i> 2000; 49: 496-504.                  | Study Design |
| 109 | Perna V and Morera R. Prognostic factors in chest traumas: A prospective study of 500 patients. <i>Cirugía Española (English Edition).</i> 2016; 94: 165-70.                                                                                                                                             | Study Design |
| 110 | Pieracci FM, Johnson JL, Stovall RT and Jurkovich GJ. Completely thoracoscopic, intra-pleural reduction and fixation of severe rib fractures. <i>Trauma Case Reports.</i> 2015; 1: 39-43.                                                                                                                | Study Design |
| 111 | Pieracci FM, Lin Y, Rodil M, et al. A prospective, controlled clinical evaluation of surgical stabilization of severe rib fractures. <i>Journal of Trauma and Acute Care Surgery.</i> 2016; 80: 187-94.                                                                                                  | Study Design |
| 112 | Pieracci FM, Majercik S, Ali-Osman F, et al. Consensus statement: Surgical stabilization of rib fractures rib fracture colloquium clinical practice guidelines. <i>Injury.</i> 2016; 48: 307-21.                                                                                                         | Study Design |
| 113 | Pieracci FM, Rodil M, Stovall RT, et al. Surgical stabilization of severe rib fractures. <i>Journal of Trauma and Acute Care Surgery.</i> 2015; 78: 883-7.                                                                                                                                               | Study Design |
| 114 | Pimakhov V and Belov O. Optimization of chest stabilization methods for acute respiratory distress-syndrome prophylaxy and treatment in patients with craniothoracic trauma. <i>Interactive Cardiovascular and Thoracic Surgery.</i> 2014; 18: S60.                                                      | Study Design |
| 115 | Pimakhov V. Assessment of long-term outcome of different rib fracture stabilization methods for patients with craniothoracic trauma. <i>Interactive Cardiovascular and Thoracic Surgery Conference: 23rd European Conference on General Thoracic Surgery Lisbon Portugal Conference Start.</i> 2015; 21. | Study Design |
| 116 | Pompili C, Brunelli A, Xiume F and Sabbatini A. Chest wall reconstruction with a titanium rib bridge for post-traumatic parietal hernia. <i>Eur J Cardiothorac Surg.</i> 2010; 37: 737.                                                                                                                  | Study Design |
| 117 | Pressley CM, Fry WR, Philp AS, Berry SD and Smith RS. Predicting outcome of patients with chest wall injury. <i>Am J Surg.</i> 2012; 204: 910-4.                                                                                                                                                         | Study Design |
| 118 | Puranik G and Gillham N. Bilateral fractured clavicles with multiple rib fractures. <i>Emerg Med J.</i> 2007; 24: 675.                                                                                                                                                                                   | Study Design |
| 119 | Puranik G and Gillham N. Bilateral fractured clavicles with multiple rib fractures.[Erratum appears in <i>Emerg Med J.</i> 2007 Dec;24(12):867]. <i>Emerg Med J.</i> 2007; 24: 675.                                                                                                                      | Study Design |

|     |                                                                                                                                                                                                                                                                                                                                                                                                            |              |
|-----|------------------------------------------------------------------------------------------------------------------------------------------------------------------------------------------------------------------------------------------------------------------------------------------------------------------------------------------------------------------------------------------------------------|--------------|
| 120 | Pushkin S and Benyan A. Our first steps in osteosynthesis of fractured ribs using Matrix Rib technologies. European Respiratory Journal Conference: European Respiratory Society Annual Congress. 2012; 40.                                                                                                                                                                                                | Study Design |
| 121 | Qiu M, Shi Z, Xiao J, Zhang X, Ling S and Ling H. Potential Benefits of Rib Fracture Fixation in Patients with Flail Chest and Multiple Non-flail Rib Fractures. Indian Journal of Surgery. 2016; 78: 458-63.                                                                                                                                                                                              | Study Design |
| 122 | Ramponi F, Meredith GT, Bendinelli C and Soderlund T. Operative management of flail chest with anatomical locking plates (MatrixRib). ANZ J Surg. 2012; 82: 658-9.                                                                                                                                                                                                                                         | Study Design |
| 123 | Reber P, Ris HB, Inderbitzi R, Stark B and Nachbur B. Osteosynthesis of the injured chest wall: Use of the AO (Arbeitsgemeinschaft fur Osteosynthese) technique. Scandinavian Journal of Thoracic and Cardiovascular Surgery. 1993; 27: 137-42.                                                                                                                                                            | Study Design |
| 124 | Reber PU, Kniemeyer HW, Ris HB, et al. Reconstruction plates for internal fixation of flail chest [4] (multiple letters). Ann Thorac Surg. 1998; 66: 2158.                                                                                                                                                                                                                                                 | Study Design |
| 125 | Redwan B, Reichelt J, Freermann S, Semik M and Fischer S. Video-assisted minimally invasive rib osteosynthesis using intramedullary titanium splints in patients with unstable rib fractures: Treatment algorithm and first clinical results. Interactive Cardiovascular and Thoracic Surgery Conference: 23rd European Conference on General Thoracic Surgery Lisbon Portugal Conference Start. 2015; 21. | Study Design |
| 126 | Richardson JD, Franklin GA, Heffley S and Seligson D. Operative fixation of chest wall fractures: An underused procedure? Am Surg. 2007; 73: 591-6.                                                                                                                                                                                                                                                        | Study Design |
| 127 | Sahin MS, Ergun T, Cakmak G and Akyuz M. Posterior sternoclavicular joint dislocation with first rib fracture and ipsilateral vocal cord palsy. Journal of Emergency Medicine. 2012; 42: e121-e3.                                                                                                                                                                                                          | Study Design |
| 128 | Said SM, Goussous N, Zielinski MD, Schiller HJ and Kim BD. Surgical stabilization of flail chest: the impact on postoperative pulmonary function. European Journal of Trauma and Emergency Surgery. 2014; 40: 501-5.                                                                                                                                                                                       | Study Design |
| 129 | Sanchez-Lloret J, Letang E, Mateu M, et al. Indications and surgical treatment of the traumatic flail chest syndrome. An original technique. The Thoracic and cardiovascular surgeon. 1982; 30: 294-7.                                                                                                                                                                                                     | Study Design |
| 130 | Sarani B, Schulte L and Diaz JJ. Pitfalls associated with open reduction and internal fixation of fractured ribs. Injury. 2015; 46: 2335-40.                                                                                                                                                                                                                                                               | Study Design |
| 131 | Sawan TG, Nickerson TP, Thiels CA, et al. Load Sharing, not Load Bearing Plates: Lessons Learned from Failure of Rib Fracture Stabilization. The American surgeon. 2016; 82: E15-E7.                                                                                                                                                                                                                       | Study Design |

|     |                                                                                                                                                                                                                                                                                 |              |
|-----|---------------------------------------------------------------------------------------------------------------------------------------------------------------------------------------------------------------------------------------------------------------------------------|--------------|
| 132 | Schmit-Neuerburg KP, Weiss H and Labitzke R. Indication for thoracotomy and chest wall stabilization. <i>Injury</i> . 1982; 14: 26-34.                                                                                                                                          | Study Design |
| 133 | Schnuriger B and Lerf B. Unstable thorax after a coughing fit in a 70-year-old adipose patient. <i>Chirurg</i> . 2006; 77: 459-62.                                                                                                                                              | Study Design |
| 134 | Schulz-Drost S, Oppel P, Grupp S, et al. Surgical Fixation of Sternal Fractures: Preoperative Planning and a Safe Surgical Technique Using Locked Titanium Plates and Depth Limited Drilling. <i>Jove-Journal of Visualized Experiments</i> . 2015.                             | Study Design |
| 135 | Sekizawa A, Yanagawa Y, Nishi K, Takasu A and Sakamoto T. A case of thoracic degloving injury with flail chest. <i>Am J Emerg Med</i> . 2011; 29.                                                                                                                               | Study Design |
| 136 | Sellers E, Fearon P, Vincent A, Barnard S and Williams J. Rib fracture fixation and duration of ventilatory support: A single centre experience. <i>British Journal of Surgery</i> . 2013; 100: 216-.                                                                           | Study Design |
| 137 | Sellers EL, Fearon PV, Ripley C, Vincent A, Barnard S and Williams JR. The introduction of rib fracture fixation for traumatic flail chest injury: A single centre experience. <i>Trauma (United Kingdom)</i> . 2013; 15: 245-51.                                               | Study Design |
| 138 | Sherman JE, Salzberg A, Raskin NM and Beattie EJ. Chest Wall Stabilization Using Plate Fixation. <i>The Annals of Thoracic Surgery</i> . 1988; 46: 467-9.                                                                                                                       | Study Design |
| 139 | Skedros JG, Mears CS, Langston TD, Van Boerum DH and White TW. Medial scapular winging associated with rib fractures and plating corrected with pectoralis major transfer. <i>International Journal of Surgery Case Reports</i> . 2014; 5: 750-3.                               | Study Design |
| 140 | Slater MS, Mayberry JC and Trunkey DD. Operative stabilization of a flail chest six years after injury. <i>Ann Thorac Surg</i> . 2001; 72: 600-1.                                                                                                                               | Study Design |
| 141 | Solberg BD, Moon CN, Nissim AA, Wilson MT and Margulies DR. Treatment of chest wall implosion injuries without thoracotomy: Technique and clinical outcomes. <i>Journal of Trauma - Injury, Infection and Critical Care</i> . 2009; 67: 8-13.                                   | Study Design |
| 142 | Stadler M and Boogaerts JG. Dramatic improvement in oxygenation after sternotomy in a patient with acute respiratory distress syndrome. <i>Anaesthesia and Intensive Care</i> . 2012; 40: 352-4.                                                                                | Study Design |
| 143 | Tanaka H, Yukioka T, Yamaguti Y, et al. Surgical stabilization of internal pneumatic stabilization? A prospective randomized study of management of severe flail chest patients. <i>Journal of Trauma - Injury, Infection and Critical Care</i> . 2002; 52: 727-32.             | Study Design |
| 144 | Tarng YW, Liu YY, Huang FD, Lin HL, Wu TC and Chou YP. The surgical stabilization of multiple rib fractures using titanium elastic nail in blunt chest trauma with acute respiratory failure. <i>Surgical Endoscopy and Other Interventional Techniques</i> . 2016; 30: 388-95. | Study Design |
| 145 | Taylor BC, Fowler TT, French BG and Dominguez N. Clinical Outcomes of Surgical Stabilization of Flail Chest Injury. <i>Journal of</i>                                                                                                                                           | Study Design |

|     |                                                                                                                                                                                                                                                          |              |
|-----|----------------------------------------------------------------------------------------------------------------------------------------------------------------------------------------------------------------------------------------------------------|--------------|
|     | the American Academy of Orthopaedic Surgeons. 2016; 24: 575-80.                                                                                                                                                                                          |              |
| 146 | Taylor BC, French BG and Fowler TT. Surgical approaches for rib fracture fixation. <i>J Orthop Trauma</i> . 2013; 27: e168-e73.                                                                                                                          | Study Design |
| 147 | TENG Ji-ping CY-g, NI Da, et al. Outcomes of traumatic flail chest treated by operative fixation versus conservative approach. <i>Journal of Shanghai Jiaotong university (Medical Science)</i> . 2009; 29: 1495.                                        | Study Design |
| 148 | Thiels CA, Aho JM, Naik ND, et al. Infected hardware after surgical stabilization of rib fractures: Outcomes and management experience. <i>Journal of Trauma and Acute Care Surgery</i> . 2016; 17.                                                      | Study Design |
| 149 | Thomas AN, Blaisdell FW, Lewis FR, Jr. and Schlobohm RM. Operative stabilization for flail chest after blunt trauma. <i>J Thorac Cardiovasc Surg</i> . 1978; 75: 793-801.                                                                                | Study Design |
| 150 | Tiffet O, Susset V, Thevenet F, Sulaiman A, Molliex S and Zeni F. Anterior flay chest and nuss technique. <i>Interactive Cardiovascular and Thoracic Surgery</i> . 2011; 13: S14.                                                                        | Study Design |
| 151 | Tshomba Y, Bertoglio L, Marone EM, Psacharopulo D, Iob G and Chiesa R. Graft perforation by a dislocated rib fracture after open thoracoabdominal aortic repair: Emergent endovascular and open repair. <i>J Endovasc Ther</i> . 2010; 17: 126-30.       | Study Design |
| 152 | Van Peteghem S and Gevaert S. Tension pneumopericardium after blunt chest trauma. <i>Acta Cardiologica</i> . 2015; 70: 83.                                                                                                                               | Study Design |
| 153 | Vodicka J, Safranek J, Spidlen V, Vesely V, Ferda J and Louda J. Reconstruction of a crushed chest with HI-TEX (R) PARP NT implant. <i>Unfallchirurg</i> . 2007; 110: 255-8.                                                                             | Study Design |
| 154 | Voggenreiter G, Neudeck F, Aufmkolk M, Obertacke U and Schmit-Neuerburg KP. Operative chest wall stabilization in flail chest--outcomes of patients with or without pulmonary contusion. <i>J Am Coll Surg</i> . 1998; 187: 130-8.                       | Study Design |
| 155 | Vyhnanek F, Skala P and Skrabalova D. A contribution of multidetector computed tomography to indications for chest wall stabilisation in multiple rib fractures. <i>Acta Chirurgiae Orthopaedicae et Traumatologiae Cechoslovaca</i> . 2011; 78: 258-61. | Study Design |
| 156 | Wada T, Yasunaga H, Inokuchi R, et al. Effectiveness of surgical rib fixation on prolonged mechanical ventilation in patients with traumatic rib fractures: A propensity score-matched analysis. <i>J Crit Care</i> . 2015; 30: 1227-31.                 | Study Design |
| 157 | Wang S, Bao Z and Luo LF. Kirschner wire migration from the right second rib to the right ventricle: a case report. <i>Chin J Traumatol</i> . 2013; 16: 292-4.                                                                                           | Study Design |
| 158 | Webb LX and Meredith JW. A method for operative stabilization of multiple rib fractures in patients with flail chest. <i>Techniques in Orthopaedics</i> . 1991; 6: 1-9.                                                                                  | Study Design |
| 159 | Wiese MN, Kawel-Boehm N, de la Santa PM, et al. Functional results after chest wall stabilization with a new screwless fixation                                                                                                                          | Study Design |



|     |                                                                                                                                                                                                                                                                      |              |
|-----|----------------------------------------------------------------------------------------------------------------------------------------------------------------------------------------------------------------------------------------------------------------------|--------------|
|     | device. <i>Eur J Cardiothorac Surg.</i> 2015; 47: 868-75.                                                                                                                                                                                                            |              |
| 160 | Wu W-M, Yang Y, Gao Z-L, Zhao T-C and He W-W. Which is better to multiple rib fractures, surgical treatment or conservative treatment? <i>International Journal of Clinical and Experimental Medicine.</i> 2015; 8: 7930-6.                                          | Study Design |
| 161 | Xu JQ, Qiu PL, Yu RG, Gong SR, Ye Y and Shang XL. Better short-term efficacy of treating severe flail chest with internal fixation surgery compared with conservative treatments. <i>European Journal of Medical Research.</i> 2015; 24.                             | Study Design |
| 162 | Yanagawa Y, Kaneko N, Hagiwara A, Kimura T and Isoda S. Delayed sudden cardiac arrest induced by aortic injury with a posterior fracture of the left rib. <i>Gen Thorac Cardiovasc Surg.</i> 2008; 56: 91-2.                                                         | Study Design |
| 163 | Yang Y, Dong L-w and Wang J. Memory alloy embracing fixator in treatment of multiple fractured ribs and flail chest. <i>World Journal of Emergency Medicine.</i> 2010; 1: 212-5.                                                                                     | Study Design |
| 164 | Zehr M, Klar N and Malthaner RA. Risk Score for Predicting Mortality in Flail Chest. <i>Ann Thorac Surg.</i> 2015; 100: 223-8.                                                                                                                                       | Study Design |
| 165 | Zhang W, Song F, Yang Y and Tang J. Asymptomatic intracardiac migration of a Kirschner wire from the right rib. <i>Interact Cardiovasc Thorac Surg.</i> 2014; 18: 525-6.                                                                                             | Study Design |
| 166 | Zhang XF, Guo ZQ, Zhao CC, Xu CY and Wang Z. Management of patients with flail chest by surgical fixation using claw-type titanium plate. <i>J Cardiothorac Surg.</i> 2015; 10.                                                                                      | Study Design |
| 167 | Zhang Y, Tang X, Xie H and Wang RL. Comparison of surgical fixation and nonsurgical management of flail chest and pulmonary contusion. <i>Am J Emerg Med.</i> 2015; 33: 937-40.                                                                                      | Study Design |
| 168 | Mayberry J. Early stabilization of flail chest with locked plate fixation. <i>J Orthop Trauma.</i> 2011; 25: 648.                                                                                                                                                    | Study Design |
| 169 | Mayberry J. Surgical stabilization of severe rib fractures: Several caveats. <i>Journal of Trauma and Acute Care Surgery.</i> 2015; 79: 515.                                                                                                                         | Study Design |
| 170 | McKay DR, Fawzy HF, McKay KM, Nitsch R and Mahoney JL. Are chest compressions safe for the patient reconstructed with sternal plates? Evaluating the safety of cardiopulmonary resuscitation using a human cadaveric model. <i>J Cardiothorac Surg.</i> 2010; 5: 64. | Study Design |
| 171 | Mirzatoioei F and Bazzazi A. Analysis of orthopedic injuries in an airplane landing disaster and a suggested mechanism of trauma. <i>European Journal of Orthopaedic Surgery and Traumatology.</i> 2013; 23: 257-62.                                                 | Study Design |
| 172 | Mohan CPVR and Mohan R. Management of warfare chest injuries. <i>Medical Journal Armed Forces India.</i> 2010; 66: 329-32.                                                                                                                                           | Study Design |
| 173 | Molnar TF. Surgical management of chest wall trauma. <i>Thorac Surg Clin.</i> 2010; 20: 475-85.                                                                                                                                                                      | Study Design |

|     |                                                                                                                                                                                                                                       |              |
|-----|---------------------------------------------------------------------------------------------------------------------------------------------------------------------------------------------------------------------------------------|--------------|
| 174 | Moore B. Operative stabilization of nonpenetrating chest injuries. <i>Journal of Cardiovascular Surgery</i> . 1975; 70: 619–30.                                                                                                       | Study Design |
| 175 | Paris F TV, Blasco E, Cantó A, Casillas M, Pastor J, et al. . Surgical stabilization of traumatic flail chest. <i>Thorax</i> . 1975; 30: 521-7.                                                                                       | Study Design |
| 176 | Paydar S, Mousavi SM, Niakan H, Abbasi HR and Bolandparvaz S. Appropriate management of flail chest needs proper injury classification. <i>J Am Coll Surg</i> . 2012; 215: 743-4.                                                     | Study Design |
| 177 | Reber PU, Kniemeyer HW and Ris HB. Reconstruction plates for internal fixation of flail chest. <i>Ann Thorac Surg</i> . 1998; 66: 2158.                                                                                               | Study Design |
| 178 | Ricci WM, McAndrew C, Merriman D and Gardner MJ. What's new in orthopaedic trauma. <i>Journal of Bone and Joint Surgery - Series A</i> . 2011; 93: 1746-56.                                                                           | Study Design |
| 179 | Samarrai AR. Costosynthetic stabilization of massive chest wall instability. <i>Int Surg</i> . 1990; 75: 231-3.                                                                                                                       | Study Design |
| 180 | Shah TJ. On internal fixation for flail chest. <i>J Thorac Cardiovasc Surg</i> . 1996; 112: 849-50.                                                                                                                                   | Study Design |
| 181 | Leo F, Venissac N, Lopez S, Pop D, Savinelli F and Mouroux J. Anterior flail chest and sternal fracture: To fix or not to fix? <i>Asian Cardiovascular and Thoracic Annals</i> . 2003; 11: 188.                                       | Study Design |
| 182 | Vyhnanek F, Jirava D, Ocadlik M and Skrabalova D. Surgical Stabilisation of Flail Chest Injury: Indications, Technique and Results. <i>Acta Chirurgiae Orthopaedicae Et Traumatologiae Cechoslovaca</i> . 2015; 82: 303-7.            | Not English  |
| 183 | Vodicka J, Spidlen V, Safranek J, Simanek V and Altmann P. Severe injury to the chest wall - Experience with surgical therapy. <i>Zentralblatt Fur Chirurgie</i> . 2007; 132: 542-6.                                                  | Not English  |
| 184 | Barajas PMD, Otero MDP, Sanchez-Gracian CD, et al. Surgical fixation of rib fractures with clips and titanium bars (STRATOS (TM) System). Preliminary experience. <i>Cirugia Espanola</i> . 2010; 88: 180-6.                          | Not English  |
| 185 | Di Fabio D, Benetti D, Benvenuti M and Mombelloni G. [Surgical stabilization of post-traumatic flail chest. Our experience with 116 cases treated]. <i>Minerva Chir</i> . 1995; 50: 227-33.                                           | Not English  |
| 186 | Quaranta M and Vassallo G. Indications and technique of costal osteosynthesis in the flail chest. <i>Quaderni di Cooperazione Sanitaria</i> . 1985; NO. 2: 61-7.                                                                      | Not English  |
| 187 | Kakegawa S, Kamiyoshihara M, Ohtaki A, Ohki S and Morishita Y. [Surgical fixation of the ribs for flail chest injuries]. <i>Kyobu geka The Japanese journal of thoracic surgery</i> . 2006; 59: 974-9.                                | Not English  |
| 188 | Jimenez-Quijano A, Varon-Cotes JC, Garcia-Herreros-Hellal LG, Espinosa-Moya B, Rivero-Rapalino O and Salazar-Marulanda M. Rib cage osteosynthesis. Literature review and case reports. <i>Cirugia Y Cirujanos</i> . 2015; 83: 339-44. | Not English  |



|     |                                                                                                                                                                                                                                                                |              |
|-----|----------------------------------------------------------------------------------------------------------------------------------------------------------------------------------------------------------------------------------------------------------------|--------------|
| 189 | Nolasco-de la Rosa AL, Mosinoz-Montes R, Matehuala-Garcia J, Roman-Guzman E, Quero-Sandoval F and Reyes-Miranda AL. Unstable thorax fixation with bioabsorbable plates and screws. Presentation of a case series. <i>Cirugia Y Cirujanos</i> . 2015; 83: 23-8. | Not English  |
| 190 | Padilla JMC, Nadal SB, Kurowski K, Munoz CG and Paniagua JMR. Use and versatility of titanium for the reconstruction of the thoracic wall. <i>Cirugia Espanola</i> . 2014; 92: 89-94.                                                                          | Not English  |
| 191 | Albaugh G, Kann B, Puc MM, Vemulapalli P, Marra S and Ross S. Age-adjusted outcomes in traumatic flail chest injuries in the elderly. <i>Am Surg</i> . 2000; 66: 978-81.                                                                                       | Intervention |
| 192 | Ali BA and Sanfilippo F. TS02 MANAGEMENT OF FLAIL CHEST IN TRAUMA: ANALYSIS OF RISK FACTORS AFFECTING OUTCOME. <i>ANZ J Surg</i> . 2007; 77: A93-A.                                                                                                            | Intervention |
| 193 | Anonymous. Management of the stove-in chest with paradoxical movement. <i>Br Med J</i> . 1977; 1: 1242.                                                                                                                                                        | Intervention |
| 194 | Athanassiadi K, Gerazounis M and Theakos N. Management of 150 flail chest injuries: analysis of risk factors affecting outcome. <i>Eur J Cardiothorac Surg</i> . 2004; 26: 373-6.                                                                              | Intervention |
| 195 | Athanassiadi K, Theakos N, Kalantzi N and Gerazounis M. Prognostic factors in flail-chest patients. <i>Eur J Cardiothorac Surg</i> . 2010; 38: 466-71.                                                                                                         | Intervention |
| 196 | Balci AE, Eren S, Cakir O and Eren MN. Open fixation in flail chest: Review of 64 patients. <i>Asian Cardiovascular and Thoracic Annals</i> . 2004; 12: 11-5.                                                                                                  | Intervention |
| 197 | Battle CE and Evans PA. Predictors of mortality in patients with flail chest: a systematic review. <i>Emerg Med J</i> . 2015; 32: 961-5.                                                                                                                       | Intervention |
| 198 | Bugaev N, Breeze JL, Alhazmi M, et al. Magnitude of rib fracture displacement predicts opioid requirements. <i>Journal of Trauma and Acute Care Surgery</i> . 2016; 81: 699-704.                                                                               | Intervention |
| 199 | California Uo. Early Aggressive Pain Management is Associated With Improved Outcomes in Blunt Thoracic Trauma. WHO clinical trials registry platform. 2011.                                                                                                    | Intervention |
| 200 | Cannon RM, Smith JW, Franklin GA, Harbrecht BG, Miller FB and Richardson JD. Flail chest injury: Are we making any progress? <i>Am Surg</i> . 2012; 78: 398-402.                                                                                               | Intervention |
| 201 | Fabbri C, Mazieri M, Cirocchi R, Bisacci R and Cagini L. [Flail chest]. <i>Minerva Chir</i> . 1996; 51: 669-73.                                                                                                                                                | Intervention |
| 202 | Freedland M, Wilson RF, Bender JS and Levison MA. The management of flail chest injury: factors affecting outcome. <i>J Trauma</i> . 1990; 30: 1460-8.                                                                                                         | Intervention |

|     |                                                                                                                                                                                                                                                            |              |
|-----|------------------------------------------------------------------------------------------------------------------------------------------------------------------------------------------------------------------------------------------------------------|--------------|
| 203 | Gordy S, Fabricant L, Ham B, Mullins R and Mayberry J. The contribution of rib fractures to chronic pain and disability. <i>Am J Surg.</i> 2014; 207: 659-62.                                                                                              | Intervention |
| 204 | Grosse A, Grosse C, Steinbach L and Anderson S. MRI findings of prolonged post-traumatic sternal pain. <i>Skeletal Radiology.</i> 2007; 36: 423-9.                                                                                                         | Intervention |
| 205 | Hameed M. Discussion. <i>Am J Surg.</i> 2014; 207: 662-3.                                                                                                                                                                                                  | Intervention |
| 206 | Hammad AMM and Regal MA. Is Routine Spiral CT-Chest Justified in Evaluation of the Major Blunt Trauma Patients? <i>European Journal of Trauma and Emergency Surgery.</i> 2009; 35: 31-4.                                                                   | Intervention |
| 207 | Hildebrand F, Giannoudis PV, van Griensven M, et al. Management of polytraumatized patients with associated blunt chest trauma: a comparison of two European countries. <i>Injury-International Journal of the Care of the Injured.</i> 2005; 36: 293-302. | Intervention |
| 208 | Ho. H-Y. Subcutaneous longitudinal acupuncture: a novel and effective approach to acute pain relief in inpatients with rib fracture. WHO clinical trials registry platform. 2012.                                                                          | Intervention |
| 209 | Karev DV. Operative management of the flail chest. <i>Wiadomosci lekarskie (Warsaw, Poland : 1960).</i> 1997; 50 Suppl 1 Pt 2: 205-8.                                                                                                                      | Intervention |
| 210 | Khalpey Z, Marsh KM, Ferng A, et al. First in man: Sternal reconstruction with autologous stem cells. <i>ASAIO Journal.</i> 2015; 61: e31-e2.                                                                                                              | Intervention |
| 211 | Lazcano A, Dougherty JM and Kruger M. Use of rib belts in acute rib fractures. <i>Am J Emerg Med.</i> 1989; 7: 97-100.                                                                                                                                     | Intervention |
| 212 | Lee KJ, Jung K, Kim J and Kwon J. Bone scan as a screening test for missed fractures in severely injured patients. <i>Orthopaedics and Traumatology: Surgery and Research.</i> 2014; 100: 953-7.                                                           | Intervention |
| 213 | Liman ST, Kuzucu A, Tastepe AI, Ulasan GN and Topcu S. Chest injury due to blunt trauma. <i>Eur J Cardiothorac Surg.</i> 2003; 23: 374-8.                                                                                                                  | Intervention |
| 214 | Marasco S, Lee G, Summerhayes R, Fitzgerald M and Bailey M. Quality of life after major trauma with multiple rib fractures. <i>Injury.</i> 2015; 46: 61-5.                                                                                                 | Intervention |
| 215 | Miller TL, Harris JD and Kaeding CC. Stress fractures of the ribs and upper extremities: causation, evaluation, and management. <i>Sports medicine (Auckland, NZ).</i> 2013; 43: 665-74.                                                                   | Intervention |
| 216 | Montréal Ud. Analgesic Effect of Intranasal Calcitonin on Patients With Fractured Ribs. <i>ClinicalTrialsgov.</i> 2007.                                                                                                                                    | Intervention |

|     |                                                                                                                                                                                                                                                                                                                      |              |
|-----|----------------------------------------------------------------------------------------------------------------------------------------------------------------------------------------------------------------------------------------------------------------------------------------------------------------------|--------------|
| 217 | Nau T, Aldrian S, Koenig F and Vecsei V. Fixation of femoral fractures in multiple-injury patients with combined chest and head injuries. <i>ANZ J Surg.</i> 2003; 73: 1018-21.                                                                                                                                      | Intervention |
| 218 | Nishiumi N, Fujimori S, Katoh N, Iwasaki M, Inokuchi S and Inoue H. Treatment with internal pneumatic stabilization for anterior flail chest. <i>Tokai Journal of Experimental and Clinical Medicine.</i> 2007; 32: 126-30.                                                                                          | Intervention |
| 219 | O'Connor LJ. Females and fractures. <i>Orthopaedic Physical Therapy Clinics of North America.</i> 1996; 5: 85-117.                                                                                                                                                                                                   | Intervention |
| 220 | Pulley BR, Taylor BC, Fowler TT, Dominguez N and Trinh TQ. Utility of three-dimensional computed tomography for the surgical management of rib fractures. <i>Journal of Trauma and Acute Care Surgery.</i> 2015; 78: 530-4.                                                                                          | Intervention |
| 221 | Richardson JD, Adams L and Flint LM. Selective management of flail chest and pulmonary contusion. <i>Annals of Surgery.</i> 1982; 196: 481-7.                                                                                                                                                                        | Intervention |
| 222 | Sherepo KM. A portable device for rib traction. <i>Biomedical Engineering.</i> 2004; 38: 296-8.                                                                                                                                                                                                                      | Intervention |
| 223 | Sivaloganathan M, Stephens R and Grocott M. Management of flail chest. <i>Hospital medicine (London, England : 1998).</i> 2000; 61: 811.                                                                                                                                                                             | Intervention |
| 224 | System TCH. Pain Relief for Ventilated Patients With Multiple Rib Fractures Using the ON-Q Pain Relief System. <i>ClinicalTrials.gov.</i> 2009.                                                                                                                                                                      | Intervention |
| 225 | Trupka A, Waydhas C, Hallfeldt KKJ, Nast-Kolb D, Pfeifer KJ and Schweiberer L. Value of thoracic computed tomography in the first assessment of severely injured patients with blunt chest trauma: Results of a prospective study. <i>Journal of Trauma - Injury, Infection and Critical Care.</i> 1997; 43: 405-11. | Intervention |
| 226 | Vana PG, Neubauer DC and Luchette FA. Contemporary management of flail chest. <i>Am Surg.</i> 2014; 80: 527-35.                                                                                                                                                                                                      | Intervention |
| 227 | Velmahos GC, Vassiliu P, Chan LS, Murray JA, Berne TV and Demetriades D. Influence of flail chest on outcome among patients with severe thoracic cage trauma. <i>Int Surg.</i> 2002; 87: 240-4.                                                                                                                      | Intervention |
| 228 | Wilson RF, Murray C and Antonenko DR. Nonpenetrating thoracic injuries. <i>Surgical Clinics of North America.</i> 1977; 57: 17-36.                                                                                                                                                                                   | Intervention |
| 229 | Yeginsu A, Ergin M and Gurlek K. A rare complication after Velpau bandage: hemopneumothorax. <i>Ulusal Travma Ve Acil Cerrahi Dergisi-Turkish Journal of Trauma &amp; Emergency Surgery.</i> 2013; 19: 274-6.                                                                                                        | Intervention |
| 230 | Kamiyoshihara M, Kawatani N and Igai H. Modified application of a wound retractor for surgery in chest trauma. <i>Asian Cardiovascular and Thoracic Annals.</i> 2015; 23: 232-4.                                                                                                                                     | Intervention |

|     |                                                                                                                                                                                                                                                                     |              |
|-----|---------------------------------------------------------------------------------------------------------------------------------------------------------------------------------------------------------------------------------------------------------------------|--------------|
| 231 | McCunn M, Gordon EKB and Scott TH. Anesthetic Concerns in Trauma Victims Requiring Operative Intervention: The Patient Too Sick to Anesthetize. <i>Anesthesiology Clinics</i> . 2010; 28: 97-116.                                                                   | Intervention |
| 232 | Diethelm AG and Battle W. Management of flail chest injury: a review of 75 cases. <i>Am Surg</i> . 1971; 37: 667-70.                                                                                                                                                | Intervention |
| 233 | Agnew AM, Schafman M, Moorhouse K, White SE and Kang YS. The effect of age on the structural properties of human ribs. <i>Journal of the Mechanical Behavior of Biomedical Materials</i> . 2015; 41: 302-14.                                                        | Non- Human   |
| 234 | Ahern BJ and Levine DG. Multiple Rib Fracture Repair in a Neonatal Holstein Calf. <i>Veterinary Surgery</i> . 2009; 38: 787-90.                                                                                                                                     | Non- Human   |
| 235 | Bellezzo F, Hunt RJ, Provost P, Bain FT and Kirker-Head C. Surgical repair of rib fractures in 14 neonatal foals: case selection, surgical technique and results. <i>Equine Veterinary Journal</i> . 2004; 36: 557-62.                                              | Non- Human   |
| 236 | Blackburne WB, Waddell JN, Swain MV, de Sous RJA and Kieser JA. Biomechanical investigation of impact induced rib fractures of a porcine infant surrogate model. <i>Journal of the Mechanical Behavior of Biomedical Materials</i> . 2016; 62: 588-98.              | Non- Human   |
| 237 | Bottlang M, Helzel I, Long W, Fitzpatrick D and Madey S. Less-invasive stabilization of rib fractures by intramedullary fixation: A biomechanical evaluation. <i>Journal of Trauma - Injury, Infection and Critical Care</i> . 2010; 68: 1218-24.                   | Non- Human   |
| 238 | Bottlang M, Helzel I, Long WB and Madey S. Anatomically contoured plates for fixation of Rib fractures. <i>Journal of Trauma - Injury, Infection and Critical Care</i> . 2010; 68: 611-5.                                                                           | Non- Human   |
| 239 | Bottlang M, Helzel I, Long WB and Madey SM. Less-invasive stabilization of rib fractures by intramedullary fixation: A biomechanical evaluation of two techniques. <i>Chest Conference: American College of Chest Physicians Annual Meeting, CHEST</i> . 2009; 136. | Non- Human   |
| 240 | Bottlang M, Helzel I, Long WM and Madey S. Anatomically contoured plates for fixation of rib fractures. <i>Chest Conference: American College of Chest Physicians Annual Meeting, CHEST</i> . 2009; 136.                                                            | Non- Human   |
| 241 | Bottlang M, Walleser S, Noll M, et al. Biomechanical rationale and evaluation of an implant system for rib fracture fixation. <i>European Journal of Trauma and Emergency Surgery</i> . 2010; 36: 417-26.                                                           | Non- Human   |
| 242 | Campbell N, Richardson M and Antippa P. Biomechanical testing of two devices for internal fixation of fractured ribs. <i>Journal of Trauma - Injury, Infection and Critical Care</i> . 2010; 68: 1234-8.                                                            | Non- Human   |
| 243 | Casha AR, Camilleri L, Manche A, et al. Internal rib structure can be predicted using mathematical models: An anatomic study comparing the chest to a shell dome with application to understanding fractures. <i>Clinical Anatomy</i> . 2015; 28: 1008-16.          | Non- Human   |
| 244 | Downs C and Rodgeron D. The use of nylon cable ties to repair rib fractures in neonatal foals. <i>Canadian Veterinary Journal</i> -                                                                                                                                 | Non- Human   |

|     |                                                                                                                                                                                                                                                                                 |            |
|-----|---------------------------------------------------------------------------------------------------------------------------------------------------------------------------------------------------------------------------------------------------------------------------------|------------|
|     | Revue Veterinaire Canadienne. 2011; 52: 307-9.                                                                                                                                                                                                                                  |            |
| 245 | Fukunaga T, Yamashiro T, Oya S, Takeshita N, Takigawa M and Takano-Yamamoto T. Connective tissue growth factor mRNA expression pattern in cartilages is associated with their type I collagen expression. Bone. 2003; 33: 911-8.                                                | Non- Human |
| 246 | Gabrielli F, Subit D, Ogam E, Guillemain P, Kent RW and Masson C. Time-frequency analysis to detect bone fracture in impact biomechanics. Application to the thorax. Medical Engineering & Physics. 2009; 31: 952-8.                                                            | Non- Human |
| 247 | Goodspeed MJ, Vanderby R and Agarwal S. Mechanical testing of modeled rib fractures with plated fixation on the internal surface. Journal of Surgical Research. 2014; 186 (2): 663.                                                                                             | Non- Human |
| 248 | Gyhra A, Torres P, Pino J, Palacios S and Cid L. Experimental flail chest: Ventilatory function with fixation of flail segment in internal and external position. Journal of Trauma-Injury Infection and Critical Care. 1996; 40: 977-9.                                        | Non- Human |
| 249 | Helzel I, Long W, Fitzpatrick D, Madey S and Bottlang M. Evaluation of intramedullary rib splints for less-invasive stabilisation of rib fractures. Injury. 2009; 40: 1104-10.                                                                                                  | Non- Human |
| 250 | Huang KN, Xu ZF, Sun JX, et al. Stabilization of multiple rib fractures in a canine model. Journal of Surgical Research. 2014; 192: 621-7.                                                                                                                                      | Non- Human |
| 251 | Jerram RM and Herron MR. Scapular fractures in dogs. Compendium on Continuing Education for the Practicing Veterinarian. 1998; 20: 1254-+.                                                                                                                                      | Non- Human |
| 252 | Kato Y, Nakashima K, Iwamoto M, et al. EFFECTS OF INTERLEUKIN-1 ON SYNTHESSES OF ALKALINE-PHOSPHATASE, TYPE-X COLLAGEN, AND 1,25-DIHYDROXYVITAMIN-D(3) RECEPTOR, AND MATRIX CALCIFICATION IN RABBIT CHONDROCYTE CULTURES. Journal of Clinical Investigation. 1993; 92: 2323-30. | Non- Human |
| 253 | Kawahata H, Sotobayashi D, Aoki M, et al. Continuous infusion of angiotensin II modulates hypertrophic differentiation and apoptosis of chondrocytes in cartilage formation in a fracture model mouse. Hypertension Research. 2015; 38: 382-93.                                 | Non- Human |
| 254 | Kemper AR, Kennedy EA, McNally C, Manoogian SJ, Stitzel JD and Duma SM. Reducing Chest Injuries in Automobile Collisions: Rib Fracture Timing and Implications for Thoracic Injury Criteria. Annals of Biomedical Engineering. 2011; 39: 2141-51.                               | Non- Human |
| 255 | Kindig M, Lau AG and Kent RW. Biomechanical Response of Ribs Under Quasistatic Frontal Loading. Traffic Injury Prevention. 2011; 12: 377-87.                                                                                                                                    | Non- Human |
| 256 | Kraus BM, Richardson DW, Sheridan G and Wilkins PA. Multiple rib fracture in a neonatal foal using a nylon strand suture repair technique. Veterinary Surgery. 2005; 34: 399-404.                                                                                               | Non- Human |

|     |                                                                                                                                                                                                                                            |            |
|-----|--------------------------------------------------------------------------------------------------------------------------------------------------------------------------------------------------------------------------------------------|------------|
| 257 | Liovic P, Sutalo ID and Marasco SF. Stress analysis of a centrally fractured rib fixated by an intramedullary screw. <i>Computer Methods in Biomechanics and Biomedical Engineering</i> . 2014; 17: 944-57.                                | Non- Human |
| 258 | Liovic P, Sutalo ID and Marasco SF. Fixation of a human rib by an intramedullary telescoping splint anchored by bone cement. <i>Computer Methods in Biomechanics and Biomedical Engineering</i> . 2016; 19: 1297-305.                      | Non- Human |
| 259 | Lopez-Valdes FJ, Juste-Lorente O, Maza-Frechin M, et al. Analysis of occupant kinematics and dynamics in nearside oblique impacts. <i>Traffic Injury Prevention</i> . 2016; 17: 86-92.                                                     | Non- Human |
| 260 | Marasco SF, Liovic P and Sutalo ID. Structural integrity of intramedullary rib fixation using a single bioresorbable screw. <i>Journal of Trauma and Acute Care Surgery</i> . 2012; 73: 668-73.                                            | Non- Human |
| 261 | Marasco SF, Sutalo ID and Bui AV. Mode of failure of rib fixation with absorbable plates: A clinical and numerical modeling study. <i>Journal of Trauma - Injury, Infection and Critical Care</i> . 2010; 68: 1225-33.                     | Non- Human |
| 262 | McDonald AC, Schuijers JA, Shen PJ, Gundlach AL and Grills BL. Expression of galanin and galanin receptor-1 in normal bone and during fracture repair in the rat. <i>Bone</i> . 2003; 33: 788-97.                                          | Non- Human |
| 263 | Mohr M, Abrams E, Engel C, Long WB and Bottlang M. Geometry of human ribs pertinent to orthopedic chest-wall reconstruction. <i>J Biomech</i> . 2007; 40: 1310-7.                                                                          | Non- Human |
| 264 | Mommsen P, Barkhausen T, Frink M, et al. Productive capacity of alveolar macrophages and pulmonary organ damage after femoral fracture and hemorrhage in IL-6 knockout mice. <i>Cytokine</i> . 2011; 53: 60-5.                             | Non- Human |
| 265 | Murata K, Kitaori T, Oishi S, et al. Stromal Cell-Derived Factor 1 Regulates the Actin Organization of Chondrocytes and Chondrocyte Hypertrophy. <i>Plos One</i> . 2012; 7.                                                                | Non- Human |
| 266 | Norrdin RW, Hoopes KJ and O'Toole D. Skeletal changes in hemochromatosis of salers cattle. <i>Veterinary Pathology</i> . 2004; 41: 612-23.                                                                                                 | Non- Human |
| 267 | Perry MJ and Youngson CC. IN-VITRO FRACTURE FIXATION - ADHESIVE SYSTEMS COMPARED WITH A CONVENTIONAL TECHNIQUE. <i>British Journal of Oral &amp; Maxillofacial Surgery</i> . 1995; 33: 224-7.                                              | Non- Human |
| 268 | Perry TG, Mageswaran P, Colbrunn RW, Bonner TF, Francis T and McLain RF. Biomechanical evaluation of a simulated T-9 burst fracture of the thoracic spine with an intact rib cage. <i>Journal of Neurosurgery-Spine</i> . 2014; 21: 481-8. | Non- Human |
| 269 | Pignon C, Vallefuoco R, Krumeich N and Moissonnier P. SURGICAL REPAIR OF A PELVIC FRACTURE IN A FERRET (MLISTELA PLITORILIS FLTRO). <i>Journal of Exotic Pet Medicine</i> . 2014; 23: 96-100.                                              | Non- Human |



|     |                                                                                                                                                                                                                                                                           |            |
|-----|---------------------------------------------------------------------------------------------------------------------------------------------------------------------------------------------------------------------------------------------------------------------------|------------|
| 270 | Puma F, Ragusa M and Daddi G. Chest wall stabilization with synthetic reabsorbable material. <i>The Annals of thoracic surgery</i> . 1992; 53: 408-11.                                                                                                                    | Non- Human |
| 271 | Qi BC, Yu JL, Zhao Y, Zhu D and Yu TC. Mouse fracture models: a primer. <i>International Journal of Clinical and Experimental Medicine</i> . 2016; 9: 12418-29.                                                                                                           | Non- Human |
| 272 | Recknagel S, Bindl R, Brochhausen C, et al. Systemic inflammation induced by a thoracic trauma alters the cellular composition of the early fracture callus. <i>Journal of Trauma and Acute Care Surgery</i> . 2013; 74: 531-7.                                           | Non- Human |
| 273 | Recknagel S, Bindl R, Kurz J, et al. Experimental Blunt Chest Trauma Impairs Fracture Healing in Rats. <i>Journal of Orthopaedic Research</i> . 2011; 29: 734-9.                                                                                                          | Non- Human |
| 274 | Recknagel S, Bindl R, Kurz J, et al. C5aR-antagonist significantly reduces the deleterious effect of a blunt chest trauma on fracture healing. <i>Journal of Orthopaedic Research</i> . 2012; 30: 581-6.                                                                  | Non- Human |
| 275 | Rinnovati R, Romagnoli N, Castagnetti C, Pirrone A, Valentini S and Spadari A. Stabilization of multiple rib fractures with cerclage wire in a colt trotter. <i>Ippologia</i> . 2014; 25: 9-12.                                                                           | Non- Human |
| 276 | Sales JR, Ellis TJ, Gillard J, et al. Biomechanical testing of a novel, minimally invasive rib fracture plating system. <i>Journal of Trauma - Injury, Infection and Critical Care</i> . 2008; 64: 1270-4.                                                                | Non- Human |
| 277 | Schoell SL, Weaver AA, Vavalle NA and Stitzel JD. Age- and Sex-Specific Thorax Finite Element Model Development and Simulation. <i>Traffic Injury Prevention</i> . 2015; 16: S57-S65.                                                                                     | Non- Human |
| 278 | Shaw G, Lessley DJ, Ash JL, et al. Side Impact PMHS Thoracic Response With Large-Volume Air Bag. <i>Traffic Injury Prevention</i> . 2014; 15: 40-7.                                                                                                                       | Non- Human |
| 279 | Shkrum MJ, McClafferty KJ, Green RN, Nowak ES and Young JG. Mechanisms of aortic injury in fatalities occurring in motor vehicle collisions. <i>Journal of Forensic Sciences</i> . 1999; 44: 44-56.                                                                       | Non- Human |
| 280 | Slobogean GP, Kim H, Russell JP, Stockton DJ, Hsieh AH and O'Toole RV. Rib fracture fixation restores inspiratory volume and peak flow in a full thorax human cadaveric breathing model. <i>Archives of Trauma Research</i> . 2015; 4 (4) (no pagination).                | Non- Human |
| 281 | Teixeira P, Puntel V, Martinelli I and Queiroz S. Flail chest: ribs stabilization suture. An original technique. 1997, p.155-7.                                                                                                                                           | Non- Human |
| 282 | Vallefuoco R, Bedu AS, Manassero M, Viateau V, Niebauer G and Moissonnier P. Computed tomographic study of the optimal safe implantation corridors in feline thoraco-lumbar vertebrae. <i>Veterinary and Comparative Orthopaedics and Traumatology</i> . 2013; 26: 372-8. | Non- Human |

|     |                                                                                                                                                                                                                                                              |            |
|-----|--------------------------------------------------------------------------------------------------------------------------------------------------------------------------------------------------------------------------------------------------------------|------------|
| 283 | Vu KC, Skourtis ME, Gong X, Zhou MH, Ozaki W and Winn SR. Reduction of rib fractures with a bioresorbable plating system: Preliminary observations. <i>Journal of Trauma-Injury Infection and Critical Care</i> . 2008; 64: 1264-9.                          | Non- Human |
| 284 | Yoganandan N, Pintar FA, Gennarelli TA, Martin PG and Ridella SA. Chest Deflections and Injuries in Oblique Lateral Impacts. <i>Traffic Injury Prevention</i> . 2008; 9: 162-7.                                                                              | Non- Human |
| 285 | Yu YH, Fan CL, Hsu YH, Chou YC, Ueng SWN and Liu SJ. A Novel Biodegradable Polycaprolactone Fixator for Osteosynthesis Surgery of Rib Fracture: In Vitro and in Vivo Study. <i>Materials</i> . 2015; 8: 7714-22.                                             | Non- Human |
| 286 | Humphries AR and Lube M. Use of porcine dermal allograft to prevent pulmonary herniation in a patient with multiple displaced rib fractures requiring Surgical Fixation. <i>Am Surg</i> . 2015; 81: E109-E10.                                                | Non- Human |
| 287 | Abdolmohammadi S, Hetu PO, Neron A and Blaise G. efficacy of an intrathecal multidrug infusion for pain control in older adults and in end-stage malignancies: a report of three cases. <i>Pain Research &amp; Management</i> . 2015; 20: 118-22.            | Population |
| 288 | Abudou M, Chen X, Kong X and Wu T. Surgical versus non-surgical treatment for thoracolumbar burst fractures without neurological deficit. <i>Cochrane Database Syst Rev</i> . John Wiley & Sons, Ltd, 1996.                                                  | Population |
| 289 | Ahmad RM, Umakanthan R, Lawson M, Leacche M, Solenkova NV and Byrne JG. Nonsurgical management of traumatic cardiac pseudoaneurysms. <i>Journal of Thoracic and Cardiovascular Surgery</i> . 2010; 139: e83-e5.                                              | Population |
| 290 | Ahmed B, Perry M and Shetty S. INTERESTING CASE: Pseudoaneurysm of internal carotid artery after severe maxillofacial injury which caused superior orbital fissure syndrome. <i>British Journal of Oral and Maxillofacial Surgery</i> . 2006; 44: 316.       | Population |
| 291 | Ahmed S, Truong L, Eknayan G and Workeneh B. Evolving spectrum of HIV-associated nephropathy. <i>Nephron - Clinical Practice</i> . 2013; 121: c131-c5.                                                                                                       | Population |
| 292 | Akkas Y, Peri NG, Kocer B and Kaplan T. Repair of lung herniation with titanium prosthetic ribs and Prolene mesh. <i>Asian Cardiovascular and Thoracic Annals</i> . 2016; 24: 280-2.                                                                         | Population |
| 293 | Anavian J, Guthrie ST and Cole PA. Surgical management of multiple painful rib nonunions in patient with a history of severe shoulder girdle trauma: A case report and literature review. <i>J Orthop Trauma</i> . 2009; 23: 600-4.                          | Population |
| 294 | Anderson M, Rose P, Jacofsky DJ, Torchia ME and Dahm DL. Intrathoracic fracture-dislocation of the proximal humerus: A case report and report of a new surgical technique. <i>Journal of Trauma - Injury, Infection and Critical Care</i> . 2007; 63: 920-3. | Population |
| 295 | Andreula C, Marano G and Ettore GC. Spinal alveolar hydatidosis. <i>Rivista Di Neuroradiologia</i> . 2001; 14: 95-101.                                                                                                                                       | Population |
| 296 | Andronic A, Weusten A and Harrison J. Anatomic healing of a humeral shaft fracture despite failure of plate fixation-locking plates                                                                                                                          | Population |



|     |                                                                                                                                                                                                                                                                              |            |
|-----|------------------------------------------------------------------------------------------------------------------------------------------------------------------------------------------------------------------------------------------------------------------------------|------------|
|     | are a good idea. <i>European Orthopaedics and Traumatology</i> . 2015; 6: 471-3.                                                                                                                                                                                             |            |
| 297 | Antoni M, Charles YP, Walter A, Bogorin I and Steib JP. Consolidation of anterior grafts in thoracolumbar fractures. <i>Eur Spine J</i> . 2011; 20 (7): 1198.                                                                                                                | Population |
| 298 | Aoki M, Hatayama Y, Kawaguchi H, et al. Clinical outcome of stereotactic body radiotherapy for primary and oligometastatic lung tumors: a single institutional study with almost uniform dose with different five treatment schedules. <i>Radiation Oncology</i> . 2016; 11. | Population |
| 299 | Bahk MS, Kuhn JE, Galatz LM, Connor PM and Williams Jr GR. Acromioclavicular and sternoclavicular injuries and clavicular, glenoid, and scapular fractures. <i>Journal of Bone and Joint Surgery - Series A</i> . 2009; 91: 2492-510.                                        | Population |
| 300 | Bakowitz M, Bruns B and McCunn M. Acute lung injury and the acute respiratory distress syndrome in the injured patient. <i>Scandinavian Journal of Trauma Resuscitation &amp; Emergency Medicine</i> . 2012; 20.                                                             | Population |
| 301 | Baldwin C and Weekes CE. Dietary advice with or without oral nutritional supplements for disease-related malnutrition in adults. <i>Cochrane Database Syst Rev</i> . John Wiley & Sons, Ltd, 1996.                                                                           | Population |
| 302 | Baljet B. Aspects of the history of osteogenesis imperfecta (Vrolik's syndrome). <i>Annals of Anatomy-Anatomischer Anzeiger</i> . 2002; 184: 1-7.                                                                                                                            | Population |
| 303 | Barrera LM, Perel P, Ker K, Cirocchi R, Farinella E and Morales Uribe CH. Thromboprophylaxis for trauma patients. <i>Cochrane Database Syst Rev</i> . John Wiley & Sons, Ltd, 1996.                                                                                          | Population |
| 304 | Bartolek D, Finci D, Munjiza A, Prkacin I, Cavric G and Ljubicic S. Lepirudin and heparin-induced thrombocytopenia in a trauma patient with acetabulum fracture: A case report. <i>Neurologia Croatica</i> . 2013; 62: 27-31.                                                | Population |
| 305 | Bavare C, Kim M, Blackmon S, Ellsworth W, Davies MG and Reardon MJ. Delayed aortic rupture after aortic endograft placement in patient with spinal hardware. <i>Ann Thorac Surg</i> . 2011; 92: 1512-4.                                                                      | Population |
| 306 | Beaven A, Toman E and Cooper J. Post binder radiography in pelvic trauma. <i>BMJ Case Rep</i> . 2016; 2016 (no pagination).                                                                                                                                                  | Population |
| 307 | Beisse R, Potulski M, Temme C and Buhren V. Endoscopic controlled splitting of the diaphragm. A minimal invasive approach for the treatment of thoraco-lumbar fractures of the spine. <i>Unfallchirurg</i> . 1998; 101: 619-27.                                              | Population |
| 308 | Benli IT, Kaya A, Uruc V and Akalin S. Minimum 5-year follow-up surgical results of post-traumatic thoracic and lumbar kyphosis treated with anterior instrumentation - Comparison of anterior plate and dual rod systems. <i>Spine</i> . 2007; 32: 986-94.                  | Population |
| 309 | Berg EE. The sternal-rib complex: A possible fourth column in thoracic spine fractures. <i>Spine</i> . 1993; 18: 1916-9.                                                                                                                                                     | Population |
| 310 | Berthet JP, Canaud L, Alric P, et al. Reconstruction of the chest wall in case of primary or secondary infection of the operative                                                                                                                                            | Population |

|     |                                                                                                                                                                                                                                                                                    |            |
|-----|------------------------------------------------------------------------------------------------------------------------------------------------------------------------------------------------------------------------------------------------------------------------------------|------------|
|     | site: Is there any interest in the titanium rib osteosynthesis? <i>Interactive Cardiovascular and Thoracic Surgery</i> . 2012; 15: S40.                                                                                                                                            |            |
| 311 | Betts DC and Radue R. The Effects of Positioning the Operative Limb on Tibial and Fibular Nerve Somatosensory Responses during Acetabulum Fracture Repair: A Report of Two Unusual Cases. <i>Neurodiagnostic Journal</i> . 2016; 56: 151-64.                                       | Population |
| 312 | Borens O, Bettschart V, Fischer JF and Mouhsine E. Missed traumatic hernia of the abdominal wall after contralateral pelvic and acetabular fracture. <i>Journal of Trauma - Injury, Infection and Critical Care</i> . 2003; 54: 626.                                               | Population |
| 313 | Brass P, Hellmich M, Ladra A, Ladra J and Wrzosek A. Percutaneous techniques versus surgical techniques for tracheostomy. <i>Cochrane Database Syst Rev</i> . John Wiley & Sons, Ltd, 1996.                                                                                        | Population |
| 314 | Briccoli A, De Paolis M, Campanacci L, et al. Chondrosarcoma of the chest wall: A clinical analysis. <i>Surgery Today</i> . 2002; 32: 291-6.                                                                                                                                       | Population |
| 315 | Buchbinder R, Golmohammadi K, Johnston RV, et al. Percutaneous vertebroplasty for osteoporotic vertebral compression fracture. <i>Cochrane Database Syst Rev</i> . John Wiley & Sons, Ltd, 1996.                                                                                   | Population |
| 316 | Burnham JM, Kim DC and Kamineni S. Midshaft clavicle fractures: A critical review. <i>Orthopedics</i> . 2016; 39: e814-e21.                                                                                                                                                        | Population |
| 317 | Cao J, Dai N and Chen C. Ruptured azygos vein caused by blunt trauma on left chest. <i>Chinese Medical Journal</i> . 2012; 125: 3355-6.                                                                                                                                            | Population |
| 318 | Capo JT, Hastings H, Choung E, Kinchelov T, Rossy W and Steinberg B. Hemicondylar hamate replacement arthroplasty for proximal interphalangeal joint fracture dislocations: An assessment of graft suitability. <i>Journal of Hand Surgery-American Volume</i> . 2008; 33A: 733-9. | Population |
| 319 | Cappell MS. Injury to endoscopic personnel from tripping over exposed cords, wires, and tubing in the endoscopy suite: A preventable cause of potentially severe workplace injury. <i>Digestive Diseases and Sciences</i> . 2010; 55: 947-51.                                      | Population |
| 320 | Carless PA, Henry DA and Anthony DM. Fibrin sealant use for minimising peri-operative allogeneic blood transfusion. <i>Cochrane Database Syst Rev</i> . John Wiley & Sons, Ltd, 1996.                                                                                              | Population |
| 321 | Celik B, Sahin E, Nadir A and Kaptanoglu M. Sternum fractures and effects of associated injuries. <i>Thoracic and Cardiovascular Surgeon</i> . 2009; 57: 468-71.                                                                                                                   | Population |
| 322 | Chapman MW. Role of bone stability in open fractures. <i>Instr Course Lect</i> . 1982; 31: 75-87.                                                                                                                                                                                  | Population |
| 323 | Chen C, Huang XJ, Chen MJ, Yu FL, Yin BL and Yuan YC. Surgical management of a giant sternal chondromyxoid fibroma: a case report. <i>J Cardiothorac Surg</i> . 2015; 10.                                                                                                          | Population |

|     |                                                                                                                                                                                                                                                                |            |
|-----|----------------------------------------------------------------------------------------------------------------------------------------------------------------------------------------------------------------------------------------------------------------|------------|
| 324 | Cheung A, Van Rensburg L and Tytherleigh-Strong GM. Surgical versus conservative interventions for treating fractures of the middle third of the clavicle. <i>Cochrane Database Syst Rev</i> . John Wiley & Sons, Ltd, 1996.                                   | Population |
| 325 | Chin KJ, Cubillos JE and Alakkad H. Single, double or multiple-injection techniques for non-ultrasound guided axillary brachial plexus block in adults undergoing surgery of the lower arm. <i>Cochrane Database Syst Rev</i> . John Wiley & Sons, Ltd, 1996.  | Population |
| 326 | Choi BH, Huh JY, Suh CH and Kim KN. An in vitro evaluation of miniplate fixation techniques for fractures of the atrophic edentulous mandible. <i>International Journal of Oral and Maxillofacial Surgery</i> . 2005; 34: 174-7.                               | Population |
| 327 | Chou SS, Sena MJ and Wong MS. Use of sternalock plating system in acute treatment of unstable traumatic sternal fractures. <i>Ann Thorac Surg</i> . 2011; 91: 597-9.                                                                                           | Population |
| 328 | Cirocchi R, Randolph JJ, Montedori A, et al. Staples versus sutures for surgical wound closure in adults. <i>Cochrane Database Syst Rev</i> . John Wiley & Sons, Ltd, 1996.                                                                                    | Population |
| 329 | Cobanoglu U, Hiz O, Sayir F, Ediz L and Sehitogullari A. Traumatic and atraumatic sternal fractures: Analysis of 13 cases. <i>Turk Toraks Dergisi</i> . 2012; 13: 146-51.                                                                                      | Population |
| 330 | Colaut F, Toniolo L, Sernagiotto C, Pozzobon M and Sartori CA. Thoracotomy for hemotorax in a woman with Parkinson: A case report. <i>Chirurgia</i> . 2006; 19: 379-81.                                                                                        | Population |
| 331 | Crestanello JA, Samuels LE, Kaufman MS, Thomas MP and Talucci R. Sternal fracture with mediastinal hematoma: Delayed cardiopulmonary sequelae. <i>Journal of Trauma - Injury, Infection and Critical Care</i> . 1999; 47: 161-4.                               | Population |
| 332 | Cross MB, Nam D, Van Der Meulen MCH and Bostrom MPG. A rare case of a bisphosphonate-induced peri-prosthetic femoral fracture. <i>Journal of Bone and Joint Surgery - Series B</i> . 2012; 94 B: 994-7.                                                        | Population |
| 333 | Cuschieri J, Kralovich KA, Patton JH, Horst HM, Obeid FN and Karmy-Jones R. Anterior mediastinal abscess after closed sternal fracture. <i>Journal of Trauma - Injury, Infection and Critical Care</i> . 1999; 47: 551-4.                                      | Population |
| 334 | Daniello A and Gabler HC. Characteristics of Injuries in Motorcycle-to-Barrier Collisions in Maryland. <i>Transportation Research Record</i> . 2012: 92-8.                                                                                                     | Population |
| 335 | Darabos N, Gusic N, Vlahovic T, Darabos A, Popovic I and Vlahovic I. Staged management of knee dislocation in polytrauma injured patients. <i>Injury</i> . 2013; 44: S40-S5.                                                                                   | Population |
| 336 | De Lutio Di Castelguidone E, Pinto A, Merola S, Stavolo C and Romano L. Role of spiral and multislice computed tomography in the evaluation of traumatic and spontaneous oesophageal perforation. Our experience. <i>Radiologia Medica</i> . 2005; 109: 252-9. | Population |

|     |                                                                                                                                                                                                                                        |            |
|-----|----------------------------------------------------------------------------------------------------------------------------------------------------------------------------------------------------------------------------------------|------------|
| 337 | De Vloo P, Declerck L, Stevens O and De Vleeschouwer S. A posttraumatic pontomedullary rent with good outcome. <i>Acta Neurochirurgica</i> . 2016; 158: 577-9.                                                                         | Population |
| 338 | Denis F and Burkus JK. LATERAL DISTRACTION INJURIES TO THE THORACIC AND LUMBAR SPINE - A REPORT OF 3 CASES. <i>Journal of Bone and Joint Surgery-American Volume</i> . 1991; 73A: 1049-53.                                             | Population |
| 339 | Dettmer MS, Willi N, Thiesler T, Ochsner P and Cathomas G. Nonthrombotic pulmonary embolism: New insights-a large autopsy study. <i>Laboratory Investigation</i> . 2013; 93: 4A-5A.                                                    | Population |
| 340 | Dimitroulias A, Molinero KG, Krenk DE, Muffly MT, Altman DT and Altman GT. Outcomes of Nonoperatively Treated Displaced Scapular Body Fractures. <i>Clinical Orthopaedics and Related Research</i> . 2011; 469: 1459-65.               | Population |
| 341 | Dirkes S, Dickinson S, Havey R and O'Brien D. Prone positioning: Is it safe and effective? <i>Critical Care Nursing Quarterly</i> . 2012; 35: 64-75.                                                                                   | Population |
| 342 | Dougall N, Maayan N, Soares-Weiser K, McDermott LM and McIntosh A. Transcranial magnetic stimulation (TMS) for schizophrenia. <i>Cochrane Database Syst Rev</i> . John Wiley & Sons, Ltd, 1996.                                        | Population |
| 343 | Ehrnthaller C, Huber-Lang M, Kovtun A, et al. C5aR inhibition in the early inflammatory phase does not affect bone regeneration in a model of uneventful fracture healing. <i>European Journal of Medical Research</i> . 2016; 21.     | Population |
| 344 | Elsayed A, Elgamel E, Elsayed AA, Wasserberg J and Kuncz A. Non-surgical treatment of massive traumatic corpus callosum hematoma after blunt head injury: A case report. <i>Neurologia i Neurochirurgia Polska</i> . 2016; 50: 309-12. | Population |
| 345 | El-Sayed KM. Temporomandibular Joint Reconstruction With Costochondral Graft Using Modified Approach. <i>International Journal of Oral and Maxillofacial Surgery</i> . 2008; 37: 897-902.                                              | Population |
| 346 | Engels PT, Beckett AN, Rubenfeld GD, et al. Physical rehabilitation of the critically ill trauma patient in the ICU. <i>Crit Care Med</i> . 2013; 41: 1790-801.                                                                        | Population |
| 347 | Eren F, Oksuz S, Melikoglu C, Karagoz H and Ulkur E. Saddle-Nose Deformity Repair with Microplate-Adapted Costal Cartilage. <i>Aesthetic Plastic Surgery</i> . 2014; 38: 733-41.                                                       | Population |
| 348 | Escribano MC and Laria PC. Posterolateral extracavitary approach to the spinal column. <i>Neurocirugia</i> . 1996; 7: 119-25.                                                                                                          | Population |
| 349 | Fabio R, Meredith GT, Bendinelli C and Soderlund T. Operative management of flail chest with anatomical locking plates (MatrixRib). <i>ANZ J Surg</i> . 2012; 82: 658-9.                                                               | Population |
| 350 | Farooque K, Khatri K, Dev C, Sharma V and Gupta B. Mechanism of injury and management in traumatic anterior shoulder                                                                                                                   | Population |

|     |                                                                                                                                                                                                                                           |            |
|-----|-------------------------------------------------------------------------------------------------------------------------------------------------------------------------------------------------------------------------------------------|------------|
|     | dislocation with concomitant humeral shaft and ipsilateral scapula fracture: A case report and review of the literature. <i>Journal of Medical Case Reports</i> . 2014; 8 (1) (no pagination).                                            |            |
| 351 | Fatimi SH, Anees A, Muzaffar M and Hanif HM. Acute traumatic subclavian artery thrombosis and its successful repair via resection and end-to-end anastomosis. <i>Chinese Journal of Traumatology - English Edition</i> . 2010; 13: 255-6. | Population |
| 352 | Floyd MW, France JC and Hubbard DF. Early experience with the proximal femoral locking plate. <i>Orthopedics</i> . 2013; 36: e1488-e94.                                                                                                   | Population |
| 353 | Freyrie A, Gasbarrini A, Simoes CE, Gallitto E and Gargiulo M. Delayed presentation of a thoracic aortic injury with a vertebral pedicle screw. <i>Ann Vasc Surg</i> . 2013; 27: 499.e1-3.                                                | Population |
| 354 | Gallo DR, Lett ED and Conner WC. Surgical repair of a chronic traumatic sternal fracture. <i>Ann Thorac Surg</i> . 2006; 81: 726-8.                                                                                                       | Population |
| 355 | Galvagno Jr SM, Sikorski R, Hirshon JM, et al. Helicopter emergency medical services for adults with major trauma. <i>Cochrane Database Syst Rev</i> . John Wiley & Sons, Ltd, 1996.                                                      | Population |
| 356 | Gardet E, Fouilloux V, Guerlin A and Bertin F. Subcutaneous fistula from a pneumatocele: Surgical treatment. <i>Revue Des Maladies Respiratoires</i> . 2010; 27: 1105-8.                                                                  | Population |
| 357 | Garg H, Twerenbold R and Zellweger R. Propeller and jet-ski injuries during Christmas and New Year in Western Australia. <i>Medical Journal of Australia</i> . 2011; 195: 704-5.                                                          | Population |
| 358 | Gelalis ID, Karageorgos A, Arnaoutoglou C, et al. Traumatic pneumorrhachis: Etiology, pathomechanism, diagnosis, and treatment. <i>Spine Journal</i> . 2011; 11: 153-7.                                                                   | Population |
| 359 | George R, Jeba J, Ramkumar G, Chacko AG and Tharyan P. Interventions for the treatment of metastatic extradural spinal cord compression in adults. <i>Cochrane Database Syst Rev</i> . John Wiley & Sons, Ltd, 1996.                      | Population |
| 360 | Geracci JJ and Morey AF. Bladder entrapment after external fixation of traumatic pubic diastasis: Importance of follow-up computed tomography in establishing prompt diagnosis. <i>Military Medicine</i> . 2000; 165: 492-3.              | Population |
| 361 | Geusens PP and Van Den Bergh JP. Osteoporosis and osteoarthritis: Shared mechanisms and epidemiology. <i>Current Opinion in Rheumatology</i> . 2016; 28: 97-103.                                                                          | Population |
| 362 | Giannoudis PV and Schneider E. Principles of fixation of osteoporotic fractures. <i>Journal of Bone and Joint Surgery - Series B</i> . 2006; 88: 1272-8.                                                                                  | Population |
| 363 | Gillespie LD, Robertson MC, Gillespie WJ, et al. Interventions for preventing falls in older people living in the community.                                                                                                              | Population |

|     |                                                                                                                                                                                                                                                                    |            |
|-----|--------------------------------------------------------------------------------------------------------------------------------------------------------------------------------------------------------------------------------------------------------------------|------------|
|     | Cochrane Database Syst Rev. John Wiley & Sons, Ltd, 1996.                                                                                                                                                                                                          |            |
| 364 | Goh MH, Teo LT and Pua U. Pulmonary vein pseudoaneurysm secondary to blunt trauma: A novel management strategy. <i>Ann Thorac Surg.</i> 2016; 101: 1197-200.                                                                                                       | Population |
| 365 | Good WF, Maitz G, King J, Gennari R and Gur D. Observer performance assessment of JPEG-compressed high-resolution chest images. In: Krupinski EA, (ed.). <i>Medical Imaging 1999: Image Perception and Performance.</i> 1999, p. 8-13.                             | Population |
| 366 | Goyal R, Shukla RN, Kumar G and Tandon M. Supraventricular tachycardia after an intercostal nerve block with bupivacaine treated with 10% intralipid. <i>Journal of Anaesthesiology Clinical Pharmacology.</i> 2011; 27: 564-5.                                    | Population |
| 367 | Guay J, Suresh S and Kopp S. The use of ultrasound guidance for perioperative neuraxial and peripheral nerve blocks in children. <i>Cochrane Database Syst Rev.</i> John Wiley & Sons, Ltd, 1996.                                                                  | Population |
| 368 | Guerrissi JO. Treatment Options in Maxillofacial Fractures. <i>Journal of Craniofacial Surgery.</i> 2016; 27: E445-E7.                                                                                                                                             | Population |
| 369 | Gurusamy KS, Koti R, Wilson P and Davidson BR. Antibiotic prophylaxis for the prevention of methicillin-resistant <i>Staphylococcus aureus</i> (MRSA) related complications in surgical patients. <i>Cochrane Database Syst Rev.</i> John Wiley & Sons, Ltd, 1996. | Population |
| 370 | Haddock NT, Weichman KE and Saadeh PB. Reconstruction of a massive thoracic defect: The use of anatomic rib-spanning plates. <i>Journal of Plastic, Reconstructive and Aesthetic Surgery.</i> 2012; 65: e253-e6.                                                   | Population |
| 371 | Hagino H. Other non-vertebral fractures. <i>Best Practice &amp; Research in Clinical Rheumatology.</i> 2013; 27: 731-41.                                                                                                                                           | Population |
| 372 | Hagino T, Ono T and Hamada Y. Unusual double clavicle fracture complicated by ipsilateral scapular neck fracture. <i>Journal of Orthopaedic Science.</i> 2002; 7: 417-9.                                                                                           | Population |
| 373 | Haine SE, Paelinck BP and Vrints CJ. Post-traumatic focal true left ventricular aneurysm. <i>Heart.</i> 2004; 90: 1009.                                                                                                                                            | Population |
| 374 | Hajj-Chahine J, Allain G, Tomasi J, Corbi P and Jayle C. Late postcardiotomy sternal dehiscence: A simple approach using stratos system. <i>Journal of Cardiac Surgery.</i> 2013; 28: 632-4.                                                                       | Population |
| 375 | Hamoud K, Hershkovitz I, Hanani A, Marom L and Abbas J. Internal stabilization of a flexion-distraction injury of the upper cervical spine of a toddler: A new technique and literature review. <i>Spine.</i> 2012; 37: E400-E7.                                   | Population |
| 376 | Handoll HHG and Brorson S. Interventions for treating proximal humeral fractures in adults. <i>Cochrane Database Syst Rev.</i> John Wiley & Sons, Ltd, 1996.                                                                                                       | Population |
| 377 | Handoll HHG, Sherrington C and Mak JCS. Interventions for improving mobility after hip fracture surgery in adults. <i>Cochrane Database Syst Rev.</i> John Wiley & Sons, Ltd, 1996.                                                                                | Population |



|     |                                                                                                                                                                                                                                       |            |
|-----|---------------------------------------------------------------------------------------------------------------------------------------------------------------------------------------------------------------------------------------|------------|
| 378 | Haraguchi S, Hioki M, Hisayoshi T, et al. Resection of sternal tumors and reconstruction of the thorax: A review of 15 patients. <i>Surgery Today</i> . 2006; 36: 225-9.                                                              | Population |
| 379 | Hardt J, Meerpohl JJ, Metzendorf M-I, Kienle P, Post S and Herrle F. Lateral pararectal versus transrectal stoma placement for prevention of parastomal herniation. <i>Cochrane Database Syst Rev</i> . John Wiley & Sons, Ltd, 1996. | Population |
| 380 | Harman BD, Miller NG and Probe RA. Intrathoracic humeral head fracture-dislocation. <i>J Orthop Trauma</i> . 2004; 18: 112-5.                                                                                                         | Population |
| 381 | Hart R, Janecek M, Bucek P and Chaker A. Bilateral clavicular and scapular neck fractures. Case report. <i>Scripta Medica Facultatis Medicae Universitatis Brunensis Masarykianae</i> . 2004; 77: 3-10.                               | Population |
| 382 | Heini PF. Comment on "transpedicle body augments in painful osteoporotic compression fractures" (Kung-Chia Li, Anna F.-Y. Li, Ching-Hsiang Hsieh, Hsiang-Ho Chen). <i>Eur Spine J</i> . 2007; 16: 599-600.                            | Population |
| 383 | Henley MB, Peter RE, Benirschke SK and Ashbaugh D. External fixation of the sternum for thoracic trauma. <i>J Orthop Trauma</i> . 1991; 5: 493-7.                                                                                     | Population |
| 384 | Henry DA, Carless PA, Moxey AJ, et al. Anti-fibrinolytic use for minimising perioperative allogeneic blood transfusion. <i>Cochrane Database Syst Rev</i> . John Wiley & Sons, Ltd, 1996.                                             | Population |
| 385 | Hildebrand F, Giannoudis P, Krettek C and Pape HC. Damage control: extremities. <i>Injury-International Journal of the Care of the Injured</i> . 2004; 35: 678-89.                                                                    | Population |
| 386 | Hirata T, Fukuse T, Mizuno H, Hitomi S and Wada H. Clinical application of biodegradable rib connecting pins in thoracotomy. <i>Thoracic and Cardiovascular Surgeon</i> . 1999; 47: 183-7.                                            | Population |
| 387 | Huang BT. A New Suture Technique Avoids Rib Fractures and Intercostal Nerve Trauma in Thoracotomy. <i>Thoracic and Cardiovascular Surgeon</i> . 2014; 62: 728-9.                                                                      | Population |
| 388 | Huang YP, Tsai FF, Huang CH, Huang HH, Fan SZ and Lin PL. Coronary artery dissection in a patient with traumatic femoral shaft fracture. <i>Acta Anaesthesiologica Taiwanica</i> . 2010; 48: 191-3.                                   | Population |
| 389 | Igai H, Kamiyoshihara M, Nagashima T, Ohtaki Y and Shimizu K. A new application of a wound retractor for chest wall surgery. <i>General Thoracic and Cardiovascular Surgery</i> . 2013; 61: 53-4.                                     | Population |
| 390 | Ishikawa Y, Nakamura T, Kato T, et al. Dosemetric Parameters Predictive of Rib Fractures after Proton Beam Therapy for Early-Stage Lung Cancer. <i>Tohoku Journal of Experimental Medicine</i> . 2016; 238: 339-45.                   | Population |
| 391 | Jahromi AH, Cyrus JW and Youssef AM. Platyabdominalgia: A novel medical terminology describing a symptom. <i>Am Surg</i> . 2013;                                                                                                      | Population |

|     |                                                                                                                                                                                                                                                               |            |
|-----|---------------------------------------------------------------------------------------------------------------------------------------------------------------------------------------------------------------------------------------------------------------|------------|
|     | 79: E40-E2.                                                                                                                                                                                                                                                   |            |
| 392 | Jones GL. Upper extremity stress fractures. <i>Clinics in Sports Medicine</i> . 2006; 25: 159-74.                                                                                                                                                             | Population |
| 393 | Jutte PC and van Loenhout-Rooyackers JH. Routine surgery in addition to chemotherapy for treating spinal tuberculosis. <i>Cochrane Database Syst Rev</i> . John Wiley & Sons, Ltd, 1996.                                                                      | Population |
| 394 | Kakarla UK, Little AS, Chang SW, Sonntag VKH and Theodore N. Placement of percutaneous thoracic pedicle screws using neuronavigation. <i>World Neurosurgery</i> . 2010; 74: 606-10.                                                                           | Population |
| 395 | Kalaaji A, Lilja J, Elander A and Friede H. Tibia as donor site for alveolar bone grafting in patients with cleft lip and palate: Long term experience. <i>Scandinavian Journal of Plastic and Reconstructive Surgery and Hand Surgery</i> . 2001; 35: 35-42. | Population |
| 396 | Karger B, Fracasso T and Pfeiffer H. Fatalities related to medical restraint devices - Asphyxia is a common finding. <i>Forensic Science International</i> . 2008; 178: 178-84.                                                                               | Population |
| 397 | Kaufman JM and Goemaere S. Osteoporosis in men. <i>Best Practice and Research: Clinical Endocrinology and Metabolism</i> . 2008; 22: 787-812.                                                                                                                 | Population |
| 398 | Kayabasoglu G, Nacar A, Yilmaz MS, Altundag A, Cayonu M and Guven M. A Novel Method for Nasal Dorsal Reconstruction: Permanent Fixation Using Kirschner Wire-Guided Hidden Sutures. <i>Journal of Craniofacial Surgery</i> . 2015; 26: 881-4.                 | Population |
| 399 | Kearsley R, Dalton DM, Motherway C and O'Farrell D. Spinal cord infarction as a rare complication of fat embolism syndrome following bilateral intramedullary nailing of femur fractures. <i>Irish Journal of Medical Science</i> . 2016; 1): S135.           | Population |
| 400 | Khanna P, Lee A and Poon MC. Fracture risk in patients with haemophilia. <i>Haemophilia</i> . 2016; 22: e113-e5.                                                                                                                                              | Population |
| 401 | Khodadadyan C, Hoffmann R, Neumann K and Sudkamp NP. Unrecognized pneumothorax as a cause of intraspinal air. <i>Spine</i> . 1995; 20: 838-40.                                                                                                                | Population |
| 402 | Khoriati AA, Rajakulasingam R and Shah R. Sternal fractures and their management. <i>Journal of Emergencies, Trauma and Shock</i> . 2013; 6: 113-6.                                                                                                           | Population |
| 403 | Kilian E, Mair H, Reichart B and Lamm P. Sternal closure after median sternotomy: A new technique using titanium hooks and wires applied parasternally. <i>Interactive Cardiovascular and Thoracic Surgery</i> . 2013; 16: 721-3.                             | Population |
| 404 | Kim W and McKee MD. Management of acute clavicle fractures. <i>Orthop Clin North Am</i> . 2008; 39: 491-505, vii.                                                                                                                                             | Population |
| 405 | Kirmani BH, Jones SG, Chung DA, Williams RJN and Malaisrie SC. Limited versus full sternotomy for aortic valve replacement. <i>Cochrane Database Syst Rev</i> . John Wiley & Sons, Ltd, 1996.                                                                 | Population |



|     |                                                                                                                                                                                                                                        |            |
|-----|----------------------------------------------------------------------------------------------------------------------------------------------------------------------------------------------------------------------------------------|------------|
| 406 | Labbe JL, Peres O, Leclair O, Goulon R, Scemama P and Jourdel F. Fractures of the upper transthoracic cage. <i>Journal of Bone and Joint Surgery - Series B</i> . 2009; 91: 91-6.                                                      | Population |
| 407 | Lamm M, Henriksen SEH and Eiskjoer S. Acute traumatic L5-S1 spondylolisthesis. <i>Journal of Spinal Disorders</i> . 2003; 16: 524-7.                                                                                                   | Population |
| 408 | Langton TJ and Walker JL. Perioperative management of the patient with coronary stents. <i>International Anesthesiology Clinics</i> . 2011; 49: 20-5.                                                                                  | Population |
| 409 | Latalski M, Fatyga M and Gregosiewicz A. Problems and complications in VEPTR-based treatment. <i>Ortopedia, traumatologia, rehabilitacja</i> . 2011; 13: 449-55.                                                                       | Population |
| 410 | Lee SH, Grant R, Kennedy C and Kilbride L. Positioning and spinal bracing for pain relief in metastatic spinal cord compression in adults. <i>Cochrane Database Syst Rev</i> . John Wiley & Sons, Ltd, 1996.                           | Population |
| 411 | Lee YS, Kim BK, Lee HJ and Dan J. Pathologic femoral neck fracture due to fanconi syndrome induced by adefovir dipivoxil therapy for hepatitis B. <i>CiOS Clinics in Orthopedic Surgery</i> . 2016; 8: 232-6.                          | Population |
| 412 | Lenza M, Buchbinder R, Johnston RV, Belloti JC and Faloppa F. Surgical versus conservative interventions for treating fractures of the middle third of the clavicle. <i>Cochrane Database Syst Rev</i> . John Wiley & Sons, Ltd, 1996. | Population |
| 413 | Leonard M, Ibrahim M, McKenna P, Boran S and McCormack D. Paediatric pelvic ring fractures and associated injuries. <i>Injury</i> . 2011; 42: 1027-30.                                                                                 | Population |
| 414 | Leung KS and Lam TP. Open reduction and internal fixation of ipsilateral fractures of the scapular neck and clavicle. <i>Journal of Bone and Joint Surgery - Series A</i> . 1993; 75: 1015-8.                                          | Population |
| 415 | Lewis SR, Butler AR, Brammar A, Nicholson A and Smith AF. Perioperative fluid volume optimization following proximal femoral fracture. <i>Cochrane Database Syst Rev</i> . John Wiley & Sons, Ltd, 1996.                               | Population |
| 416 | Lin HL, Lin JN, Lee WC, Chen CW and Kuo LC. Blunt Abdominal Injury With Isolated Gallbladder Hematoma. <i>Tzu Chi Medical Journal</i> . 2009; 21: 323-6.                                                                               | Population |
| 417 | Lin J, Shen PW and Hou SM. Complications of locked nailing in humeral shaft fractures. <i>Journal of Trauma-Injury Infection and Critical Care</i> . 2003; 54: 943-9.                                                                  | Population |
| 418 | Liporace FA, Yoon RS, Frank MA, Maurer JP and Gaines RJ. Single-Stage Total Hip Arthroplasty and Fracture Fixation for a Both Column Acetabular Fracture in Type i Osteogenesis Imperfecta. <i>Injury</i> . 2011; 42: 1184-7.          | Population |
| 419 | Liu C-j and Latham NK. Progressive resistance strength training for improving physical function in older adults. <i>Cochrane</i>                                                                                                       | Population |

|     |                                                                                                                                                                                                                                                           |            |
|-----|-----------------------------------------------------------------------------------------------------------------------------------------------------------------------------------------------------------------------------------------------------------|------------|
|     | Database Syst Rev. John Wiley & Sons, Ltd, 1996.                                                                                                                                                                                                          |            |
| 420 | Lohse GR and Lee DH. Clavicle fracture with intrathoracic displacement. <i>Orthopedics</i> . 2013; 36: e1099-e102.                                                                                                                                        | Population |
| 421 | Malavolta EA, Assuncao JH, Gracitelli MEC, Lobo FL and Ferreira Neto AA. Fracture of the clavicle and second rib: an indirect injury from tricep dips. <i>Journal of Sports Medicine and Physical Fitness</i> . 2016; 56: 909-12.                         | Population |
| 422 | Marchetti A, Jayachandran A and Guha A. Post-traumatic invasive mucormycosis. <i>Journal of the Intensive Care Society</i> . 2011; 12: 143-4.                                                                                                             | Population |
| 423 | Mauldin FW, Owen K, Hossack JA and Ieee. Specular surface reconstruction from multi-angle interrogation (SRMI) using a piston-array-based transducer for enhanced bone delineation. 2012, p.366-9.                                                        | Population |
| 424 | Mayba, II. Non-union of fractures of the sternum. <i>J Bone Joint Surg Am</i> . 1985; 67: 1091-3.                                                                                                                                                         | Population |
| 425 | Mayberry J. Invited commentary. <i>Ann Thorac Surg</i> . 2014; 98: 489.                                                                                                                                                                                   | Population |
| 426 | Mayes J, Davison E, Panahi P, et al. An anatomical evaluation of the serratus anterior plane block. <i>Anaesthesia</i> . 2016; 71: 1064-9.                                                                                                                | Population |
| 427 | Millo NZ, Plewes C, Rowe BH and Low G. Appropriateness of CT of the chest, abdomen, and pelvis in motorized blunt force trauma patients without signs of significant injury. <i>American Journal of Roentgenology</i> . 2011; 197: 1393-8.                | Population |
| 428 | Milne AC, Potter J, Vivanti A and Avenell A. Protein and energy supplementation in elderly people at risk from malnutrition. <i>Cochrane Database Syst Rev</i> . John Wiley & Sons, Ltd, 1996.                                                            | Population |
| 429 | Miner JR, Rubin J, Clark J and Reardon RF. Retrograde intubation with an extraglottic device in place. <i>Journal of Emergency Medicine</i> . 2015; 49: 864-7.                                                                                            | Population |
| 430 | Mirza A, Litwa J and Appelbe G. Late presenting volar radiocarpal fracture-dislocation. <i>Current Orthopaedic Practice</i> . 2013; 24: 220-4.                                                                                                            | Population |
| 431 | Mischke C, Verbeek JH, Saarto A, Lavoie M-C, Pahwa M and Ijaz S. Gloves, extra gloves or special types of gloves for preventing percutaneous exposure injuries in healthcare personnel. <i>Cochrane Database Syst Rev</i> . John Wiley & Sons, Ltd, 1996. | Population |
| 432 | Mladenovic D, Mladenovic M, Stojiljkovic P, Micic I and Karalejic S. Surgical treatment of dislocated fracture of the scapula column and glenoid: A 22-year follow-up. <i>Vojnosanit Pregl</i> . 2015; 72: 181-4.                                         | Population |
| 433 | Monticone M, Cedraschi C, Ambrosini E, et al. Cognitive-behavioural treatment for subacute and chronic neck pain. <i>Cochrane Database Syst Rev</i> . John Wiley & Sons, Ltd, 1996.                                                                       | Population |

|     |                                                                                                                                                                                                                                                                                                                                       |            |
|-----|---------------------------------------------------------------------------------------------------------------------------------------------------------------------------------------------------------------------------------------------------------------------------------------------------------------------------------------|------------|
| 434 | Morey AF and Geracci JJ. Bladder entrapment after external fixation of traumatic pubic diastasis: Importance of follow-up computed tomography in establishing prompt diagnosis. <i>Military Medicine</i> . 2000; 165: 492-3.                                                                                                          | Population |
| 435 | Mukalel JJ, Modi HC, Altamirano A, Pivalizza EGG and Cattano D. Thromboelastogram with platelet mapping as a marker of assurance for peripheral nerve block and patients on clopidogrel and aspirin. <i>Regional Anesthesia and Pain Medicine Conference: 37th Annual Regional Anesthesia Meeting and Workshops, ASRA</i> . 2012; 37. | Population |
| 436 | Mulawka B, Jacobson AR, Schroder LK and Cole PA. Triple and quadruple disruptions of the superior shoulder suspensory complex. <i>J Orthop Trauma</i> . 2015; 29: 264-70.                                                                                                                                                             | Population |
| 437 | Nallathamby V, Lee H, Lin YY, Lim J, Ong WC and Lim TC. Retained broken implants in the craniomaxillofacial skeleton. <i>Craniomaxillofacial Trauma and Reconstruction</i> . 2014; 7: 154-7.                                                                                                                                          | Population |
| 438 | Nelson A, Ahmed S, Harrow J, Fitzgerald S, Sanchez-Anguiano A and Gavin-Dreschnack D. Fall-related fractures in persons with spinal cord impairment: a descriptive analysis. <i>SCI nursing : a publication of the American Association of Spinal Cord Injury Nurses</i> . 2003; 20: 30-7.                                            | Population |
| 439 | Neunaber C, Oestern S, Andruszkow H, et al. Cytokine productive capacity of alveolar macrophages and Kupffer cells after femoral fracture and blunt chest trauma in a murine trauma model. <i>Immunology Letters</i> . 2013; 152: 159-66.                                                                                             | Population |
| 440 | Ng CY and Watts AC. The use of non-vascularised osteochondral autograft for reconstruction of articular surfaces in the hand and wrist. <i>Journal of Bone and Joint Surgery-British Volume</i> . 2012; 94B: 1448-54.                                                                                                                 | Population |
| 441 | Niemeier T, Leddy L, Bolster M and Chapin R. Insufficiency fracture associated with oncogenic osteomalacia. <i>Journal of Clinical Rheumatology</i> . 2013; 19: 38-42.                                                                                                                                                                | Population |
| 442 | Nisenblat V, Bossuyt PMM, Farquhar C, Johnson N and Hull ML. Imaging modalities for the non-invasive diagnosis of endometriosis. <i>Cochrane Database Syst Rev</i> . John Wiley & Sons, Ltd, 1996.                                                                                                                                    | Population |
| 443 | Nishimura K, Hamasaki T, Ohno T, Nishihara A, Ito H and Ishiguro S. Revascularization for acute blunt popliteal artery injury. <i>Acute Medicine and Surgery</i> . 2016; 3: 276-8.                                                                                                                                                    | Population |
| 444 | Obert L, Lepage D, Sergent P, et al. Post-traumatic malunion of the distal radius treated with autologous costal cartilage graft: A technical note on seven cases. <i>Orthopaedics &amp; Traumatology-Surgery &amp; Research</i> . 2011; 97: 430-7.                                                                                   | Population |
| 445 | Ogawa F, Naito M, Iyoda A and Satoh Y. Report of a rare case: occult hemothorax due to blunt trauma without obvious injury to other organs. <i>J Cardiothorac Surg</i> . 2013; 8.                                                                                                                                                     | Population |

|     |                                                                                                                                                                                                                                                             |            |
|-----|-------------------------------------------------------------------------------------------------------------------------------------------------------------------------------------------------------------------------------------------------------------|------------|
| 446 | Okamoto Y, Murakami H, Demura S, et al. The effect of kyphotic deformity because of vertebral fracture: a finite element analysis of a 10 degrees and 20 degrees wedge-shaped vertebral fracture model. <i>Spine Journal</i> . 2015; 15: 713-20.            | Population |
| 447 | Orrell RW, Copeland S and Rose MR. Scapular fixation in muscular dystrophy. <i>Cochrane Database Syst Rev</i> . John Wiley & Sons, Ltd, 1996.                                                                                                               | Population |
| 448 | Page MJ, Green S, McBain B, et al. Manual therapy and exercise for rotator cuff disease. <i>Cochrane Database Syst Rev</i> . John Wiley & Sons, Ltd, 1996.                                                                                                  | Population |
| 449 | Pai RB, Hegde HV, Srikanth V and Rao PR. Severe unilateral bronchospasm due to inadequate anesthetic depth: A case report and review of literature. <i>Saudi Journal of Anaesthesia</i> . 2012; 6: 186-8.                                                   | Population |
| 450 | Pakula AM, Phillips W and Skinner RA. A case of a traumatic chyle leak following an acute thoracic spine injury: successful resolution with strict dietary manipulation. <i>World Journal of Emergency Surgery</i> . 2011; 6.                               | Population |
| 451 | Pape HC, Giannoudis P and Krettek C. The timing of fracture treatment in polytrauma patients: relevance of damage control orthopedic surgery. <i>Am J Surg</i> . 2002; 183: 622-9.                                                                          | Population |
| 452 | Pape HC, Hildebrand F, Pertschy S, et al. Changes in the management of femoral shaft fractures in polytrauma patients: From early total care to damage control orthopedic surgery. <i>J Orthop Trauma</i> . 2004; 18: S13-S22.                              | Population |
| 453 | Pape HC, Rixen D, Morley J, et al. Impact of the method of initial stabilization for femoral shaft fractures in patients with multiple injuries at risk for complications (borderline patients). <i>Annals of Surgery</i> . 2007; 246: 491-501.             | Population |
| 454 | Pape HC. Immediate fracture fixation - Which method? Comments on the John Border Memorial Lecture, Ottawa, 2005. <i>J Orthop Trauma</i> . 2006; 20: 341-50.                                                                                                 | Population |
| 455 | Park CH, Shon OJ, Seo JS and Kim GB. Midshaft clavicle fracture with ipsilateral acromioclavicular joint separation found during serial follow-up. <i>Journal of Orthopaedic Science</i> . 2016; 21: 399-402.                                               | Population |
| 456 | Pavelescu D, Dumitrascu M, Luca Vasiliu I, Mirea L and Grintescu I. Postoperative, prolonged and refractory cerebral salt wasting syndrome (CSWS) after severe head trauma - What should we do? <i>European Journal of Anaesthesiology</i> . 2013; 30: 199. | Population |
| 457 | Pelias ME, Townsend MC and Flancbaum L. Long bone fractures predispose to pulmonary dysfunction in blunt chest trauma despite early operative fixation. <i>Surgery</i> . 1992; 111: 576-9.                                                                  | Population |
| 458 | Perry CW, Phillips BJ, Matthews MR and Caruso DM. Incidental finding of ascaris in a trauma patient. <i>Journal of Trauma - Injury, Infection and Critical Care</i> . 1999; 47: 611-2.                                                                      | Population |

|     |                                                                                                                                                                                                                                               |            |
|-----|-----------------------------------------------------------------------------------------------------------------------------------------------------------------------------------------------------------------------------------------------|------------|
| 459 | Petscavage JM, Ha AS, Khorashadi L, Perrich K and Chew FS. New and improved orthopedic hardware for the 21st century: Part 2, lower extremity and axial skeleton. <i>American Journal of Roentgenology</i> . 2011; 197: W434-W44.             | Population |
| 460 | Poole P, Chacko EE, Wood-Baker R and Cates CJ. Influenza vaccine for patients with chronic obstructive pulmonary disease. <i>Cochrane Database Syst Rev</i> . John Wiley & Sons, Ltd, 1996.                                                   | Population |
| 461 | Post M. Current concepts in the treatment of fractures of the clavicle. <i>Clinical orthopaedics and related research</i> . 1989: 89-101.                                                                                                     | Population |
| 462 | Powell R, Scott NW, Manyande A, et al. Psychological preparation and postoperative outcomes for adults undergoing surgery under general anaesthesia. <i>Cochrane Database Syst Rev</i> . John Wiley & Sons, Ltd, 1996.                        | Population |
| 463 | Poyanli O, Guven M, Unay K, Akan KH and Esenkaya A. An unusual combination of extremity fractures: Xoating body injury. <i>European Journal of Orthopaedic Surgery and Traumatology</i> . 2010; 20: 323-8.                                    | Population |
| 464 | Pulavarti RS, Symes TH and Rangan A. Surgical interventions for anterior shoulder instability in adults. <i>Cochrane Database Syst Rev</i> . John Wiley & Sons, Ltd, 1996.                                                                    | Population |
| 465 | Quwatli Z, Sivaraman S and Rishi M. Posttraumatic pulmonary pseudocysts (PPP). <i>Chest Conference: CHEST</i> . 2011; 140.                                                                                                                    | Population |
| 466 | Raman J, Onsager D and Straus D. Rib osteotomy and fixation: Enabling technique for better minithoracotomy exposure in cardiac and thoracic procedures. <i>Journal of Thoracic and Cardiovascular Surgery</i> . 2010; 139: 1083-5.            | Population |
| 467 | Raman J. Rigid Plate Fixation Promotes Better Bone Healing After Sternotomy. <i>Seminars in Thoracic and Cardiovascular Surgery</i> . 2012; 24: 147-50.                                                                                       | Population |
| 468 | Rancan M, Esser MP and Kossmann T. Irreducible traumatic obturator hip dislocation with subcapital indentation fracture of the femoral neck: A case report. <i>Journal of Trauma - Injury, Infection and Critical Care</i> . 2007; 62: E4-E6. | Population |
| 469 | Recknagel S, Bindl R, Wehner T, et al. Conversion from external fixator to intramedullary nail causes a second hit and impairs fracture healing in a severe trauma model. <i>Journal of Orthopaedic Research</i> . 2013; 31: 465-71.          | Population |
| 470 | Reichmister J and Jay P. Atypical fractures associated with long-term bisphosphonate use. <i>Clinical Geriatrics</i> . 2012; 20: 17-21.                                                                                                       | Population |
| 471 | Reilly BM, Hart PD, Mascarell S and Chatrath H. Clinical problem-solving. A question well put. <i>N Engl J Med</i> . 2009; 360: 1446-51.                                                                                                      | Population |
| 472 | Rispoli C, Andreuccetti J, Iannone L, Armellino M and Rispoli G. Anorectal avulsion: Management of a rare rectal trauma. <i>International Journal of Surgery Case Reports</i> . 2012; 3: 319-21.                                              | Population |
| 473 | Rolph R, Duffy JMN and Waltham M. Stent graft types for endovascular repair of thoracic aortic aneurysms. <i>Cochrane Database</i>                                                                                                            | Population |

|     |                                                                                                                                                                                                                                                                                                            |            |
|-----|------------------------------------------------------------------------------------------------------------------------------------------------------------------------------------------------------------------------------------------------------------------------------------------------------------|------------|
|     | Syst Rev. John Wiley & Sons, Ltd, 1996.                                                                                                                                                                                                                                                                    |            |
| 474 | Romano L, Giovine S, Guidi G, Tortora G, Cinque T and Romano S. Hepatic trauma: CT findings and considerations based on our experience in emergency diagnostic imaging. <i>European Journal of Radiology</i> . 2004; 50: 59-66.                                                                            | Population |
| 475 | Roncevic R and Stajcic Z. SURGICAL-TREATMENT OF POSTTRAUMATIC ENOPHTHALMOS - A STUDY OF 72 PATIENTS. <i>Annals of Plastic Surgery</i> . 1994; 32: 288-94.                                                                                                                                                  | Population |
| 476 | Rosenfeld HE, Limb R, Chan P, Fitzgerald M, Bradley WPL and Rosenfeld JV. Challenges in the surgical management of spine trauma in the morbidly obese patient: A case series. <i>Journal of Neurosurgery: Spine</i> . 2013; 19: 101-9.                                                                     | Population |
| 477 | Ryan G and Cavallucci D. Traumatic abdominal intercostal hernia without diaphragmatic injury. <i>Trauma</i> . 2011; 13: 364-7.                                                                                                                                                                             | Population |
| 478 | Safranek J. Sternal fractures and their surgical treatment. <i>Acta Chirurgiae Orthopaedicae et Traumatologiae Cechoslovaca</i> . 2015; 82: 76-9.                                                                                                                                                          | Population |
| 479 | Saglam F, Saglam S, Gulabi D, Eceviz E, Elmali N and Yilmaz M. Bilateral clavicle osteomyelitis: A case report. <i>International Journal of Surgery Case Reports</i> . 2014; 5: 932-5.                                                                                                                     | Population |
| 480 | Saleh A, Potemkowski A and Abu-Zidan FM. Endovascular aortic stent graft repair for blunt traumatic thoracic aortic transection. <i>Singapore Medical Journal</i> . 2008; 49: 847-8.                                                                                                                       | Population |
| 481 | Samartzis D, Shen FH, Khanna N, Fairbank J and An H. Local anesthetic at the iliac crest donor-site for postoperative pain management in spine surgery patients. <i>Cochrane Database Syst Rev</i> . John Wiley & Sons, Ltd, 1996.                                                                         | Population |
| 482 | Saratzis NA, Saratzis AN, Melas N, et al. Endovascular repair of traumatic rupture of the thoracic aorta: Single-center experience. <i>Cardiovascular and Interventional Radiology</i> . 2007; 30: 370-5.                                                                                                  | Population |
| 483 | Schlechta B, Wiedemann D, Eppel W and Kocher A. Uncomplicated vaginal delivery 6 years after stent graft repair of an acute traumatic aortic transection. <i>Interactive Cardiovascular and Thoracic Surgery</i> . 2012; 14: 120-1.                                                                        | Population |
| 484 | Schochl H, Posch A, Hanke A, Voelckel W and Solomon C. High-dose fibrinogen concentrate for haemostatic therapy of a major trauma patient with recent clopidogrel and aspirin intake. <i>Scandinavian Journal of Clinical and Laboratory Investigation</i> . 2010; 70: 453-7.                              | Population |
| 485 | Schulz-Drost S, Syed J, Besendoerfer M and Carbon RT. Sternocostal Dislocation Following Open Correction of Pectus Excavatum-"Stairway Phenomenon": Complication Management by Means of Sternocostal Locking Titanium Plate Osteosynthesis. <i>Thoracic and Cardiovascular Surgeon</i> . 2014; 62: 245-52. | Population |



|     |                                                                                                                                                                                                                                                                                                 |            |
|-----|-------------------------------------------------------------------------------------------------------------------------------------------------------------------------------------------------------------------------------------------------------------------------------------------------|------------|
| 486 | Schwagten V, Beaucourt L and Van Schil P. Traumatic manubriosternal joint disruption: Case report. <i>Journal of Trauma</i> . 1994; 36: 747-8.                                                                                                                                                  | Population |
| 487 | Schwarz N and Hocker K. OSTEOSYNTHESIS OF IRREDUCIBLE FRACTURES OF THE CLAVICLE WITH 2.7-MM ASIF PLATES. <i>Journal of Trauma-Injury Infection and Critical Care</i> . 1992; 33: 179-83.                                                                                                        | Population |
| 488 | Seder CW, Allen MS, Nichols FC, et al. Primary and Prosthetic Repair of Acquired Chest Wall Hernias: A 20-Year Experience. <i>Ann Thorac Surg</i> . 2014; 98: 484-9.                                                                                                                            | Population |
| 489 | Severson EP, Thompson CA, Resig SG and Swiontkowski MF. Transverse sternal nonunion, repair and revision: A case report and review of the literature. <i>Journal of Trauma - Injury, Infection and Critical Care</i> . 2009; 66: 1485-8.                                                        | Population |
| 490 | Shahar R, Shamir M and Johnston DE. A technique for management of bite wounds of the thoracic wall in small dogs. <i>Veterinary Surgery</i> . 1997; 26: 45-50.                                                                                                                                  | Population |
| 491 | Shapiro S, Abel T and Rodgers RB. Traumatic thoracic spinal fracture dislocation with minimal or no cord injury: Report of four cases and review of the literature. <i>Journal of Neurosurgery</i> . 2002; 96: 333-7.                                                                           | Population |
| 492 | Sharma R and Tam RK. Migrating foreign body in mediastinum--intravascular Steinman pin. <i>Interact Cardiovasc Thorac Surg</i> . 2011; 12: 883-4.                                                                                                                                               | Population |
| 493 | Shimizu J, Murata S, Arano Y, Kamesui T, Moriya M and Hayashi S. Partial sternal resection for metastasis to the sternal body and reconstruction with titanium plates: Report of two cases. <i>Chirurgia (Turin)</i> . 2015; 28: 89-93.                                                         | Population |
| 494 | Shirley PJ. Trauma and critical care III: Chest trauma. <i>Trauma</i> . 2005; 7: 133-42.                                                                                                                                                                                                        | Population |
| 495 | Sia WT, Xu GG, Puhaindran ME, Tan BK, Cheng MHW and Chew WYC. Reconstruction of Extensive Soft-Tissue Defects with Concomitant Bone Defects in the Lower Extremity with the Latissimus Dorsi-Serratus Anterior-Rib Free Flap. <i>Journal of Reconstructive Microsurgery</i> . 2015; 31: 407-13. | Population |
| 496 | Sikes JW, Jr., Smith BR and Mukherjee DP. An in vitro study of the effect of bony buttressing on fixation strength of a fractured atrophic edentulous mandible model. <i>J Oral Maxillofac Surg</i> . 2000; 58: 56-61; discussion 2.                                                            | Population |
| 497 | Sikes JW, Smith BR, Mukherjee DP and Coward KA. Comparison of fixation strengths of locking head and conventional screws, in fracture and reconstruction models. <i>Journal of Oral and Maxillofacial Surgery</i> . 1998; 56: 468-73.                                                           | Population |
| 498 | Starr AJ and Tolo VT. Timing of femoral fracture stabilization [2] (multiple letters). <i>Journal of Bone and Joint Surgery - Series A</i> . 2001; 83: 293-4.                                                                                                                                   | Population |

|     |                                                                                                                                                                                                                                                        |            |
|-----|--------------------------------------------------------------------------------------------------------------------------------------------------------------------------------------------------------------------------------------------------------|------------|
| 499 | Stawicki SP, Seamon MJ, Carvalho CM, et al. Adrenal gland injury secondary to blunt traumatic mechanisms: A marker of overall injury severity. <i>Endokrynologia Polska</i> . 2009; 60: 2-8.                                                           | Population |
| 500 | Stefani A, Nesci J and Morandi U. STRATOS <sup>TM</sup> system for the repair of pectus excavatum. <i>Interactive Cardiovascular and Thoracic Surgery</i> . 2013; 17: 1056-8.                                                                          | Population |
| 501 | Sugimoto Y, Ito Y, Shimokawa T, Shiozaki Y and Mazaki T. Percutaneous screw fixation for traumatic spondylolisthesis of the axis using iso-c3d fluoroscopy-assisted navigation (Case Report). <i>Minimally Invasive Neurosurgery</i> . 2010; 53: 83-5. | Population |
| 502 | Taggard DA and Traynelis VC. Management of cervical spinal fractures in ankylosing spondylitis with posterior fixation. <i>Spine</i> . 2000; 25: 2035-8.                                                                                               | Population |
| 503 | Taitsman LA, Nork SE, Coles CP, Barei DP and Agel J. Open clavicle fractures and associated injuries. <i>J Orthop Trauma</i> . 2006; 20: 396-9.                                                                                                        | Population |
| 504 | Takarada T, Hojo H, Iemata M, et al. Interference by adrenaline with chondrogenic differentiation through suppression of gene transactivation mediated by Sox9 family members. <i>Bone</i> . 2009; 45: 568-78.                                         | Population |
| 505 | Tanner J and Parkinson H. Double gloving to reduce surgical cross-infection. <i>Cochrane Database Syst Rev</i> . John Wiley & Sons, Ltd, 1996.                                                                                                         | Population |
| 506 | Tatsumi A, Kanemitsu N, Nakamura T and Shimizu Y. Bioabsorbable poly-L-lactide costal coaptation pins and their clinical application in thoracotomy. <i>Ann Thorac Surg</i> . 1999; 67: 765-8.                                                         | Population |
| 507 | Thomas BW, Maxwell RA, Dyer A, Dart BW and Smith PW. Unusual sequelae of blunt liver injury: Laparoscopic resection of a liver abscess and stent failure of an ischemic common bile duct stricture. <i>Am Surg</i> . 2010; 76: E69-E70.                | Population |
| 508 | Ugur HC, Attar A, Uz A, Tekdemir I, Egemen N and Genc Y. Thoracic pedicle: Surgical anatomic evaluation and relations. <i>Journal of Spinal Disorders</i> . 2001; 14: 39-45.                                                                           | Population |
| 509 | Vaishya R, Agarwal AK, Gupta N and Vijay V. Bilateral segmental pelvic and femoral fractures in a young female: A rare case report. <i>Chinese Journal of Traumatology - English Edition</i> . 2016; 19: 286-9.                                        | Population |
| 510 | Vialle LR and Vialle E. Thoracic spine fractures. <i>Injury-International Journal of the Care of the Injured</i> . 2005; 36: 65-72.                                                                                                                    | Population |
| 511 | Vincent KB, Block EFJ and Black J. Traumatic injuries associated with segways and personal transporters. <i>Am Surg</i> . 2009; 75: 722-4.                                                                                                             | Population |
| 512 | Wada S, Kasai F and Mizuma M. Rehabilitation of ipsilateral dislocation fracture of the hip and transfemoral amputation: A case                                                                                                                        | Population |



|     |                                                                                                                                                                                                                                                                                                             |            |
|-----|-------------------------------------------------------------------------------------------------------------------------------------------------------------------------------------------------------------------------------------------------------------------------------------------------------------|------------|
|     | report. PM and R. 2010; 1): S93.                                                                                                                                                                                                                                                                            |            |
| 513 | Walz M, Kolbow B and Auerbach F. Elastic, stable intramedullary nailing in midclavicular fractures - a change in treatment strategies? Unfallchirurg. 2006; 109: 200-+.                                                                                                                                     | Population |
| 514 | Wang SC, Chen CI, Liu CC, Wang CY, Chun-Jen Chen I and Huang MS. Hepatic hydrothorax after blunt chest trauma. Journal of the Chinese Medical Association. 2012; 75: 413-5.                                                                                                                                 | Population |
| 515 | Weddle G, Gandy K, Bratcher D, Pahud B and Jackson MA. Apophysomyces trapeziformis infection associated with a tornado-related injury. Pediatric Infectious Disease Journal. 2012; 31: 640-2.                                                                                                               | Population |
| 516 | Weinberg DS, Napora JK, West WH, Grimberg DC and Vallier HA. Factors associated with narcotic use after clavicle fractures. Orthopedics. 2016; 39: e917-e23.                                                                                                                                                | Population |
| 517 | Westby MD, Kennedy D, Jones D, Jones A, Doyle-Waters MM and Backman C. Post-acute physiotherapy for primary total knee arthroplasty. Cochrane Database Syst Rev. John Wiley & Sons, Ltd, 1996.                                                                                                              | Population |
| 518 | Wiesler ER, Smith AM and Shilt JS. Humeral head fracture-dislocation into the thoracic outlet: case report and review of the literature. J Shoulder Elbow Surg. 2004; 13: 576-9.                                                                                                                            | Population |
| 519 | Wirth MA, Jensen KL, Agarwal A, Curtis RJ and Rockwood Jr CA. Fracture-dislocation of the proximal part of the humerus with retroperitoneal displacement of the humeral head: A case report. Journal of Bone and Joint Surgery - Series A. 1997; 79: 763-6.                                                 | Population |
| 520 | Wong MK, Low MH and Yong R. The femur: A good alternative source of bone graft using a new reamer system when options run out. Singapore Medical Journal. 2013; 54: e38-e42.                                                                                                                                | Population |
| 521 | Wright DEP and Johnstone AJ. The floating shoulder redefined. Journal of Trauma - Injury, Infection and Critical Care. 2010; 68: E26-E9.                                                                                                                                                                    | Population |
| 522 | Wu YS, Lin Y, Zhang XL, et al. Management of hangman's fracture with percutaneous transpedicular screw fixation. Eur Spine J. 2013; 22: 79-86.                                                                                                                                                              | Population |
| 523 | Yalcin M and Aytakin I. An unusual complication: aortic graft perforation by a fractured rib after type B aortic dissection. Interactive Cardiovascular and Thoracic Surgery. 2016; 23: 338-9.                                                                                                              | Population |
| 524 | Yamazaki M, Okawa A, Furuya T, et al. Anomalous Vertebral Arteries in the Extra- and Intraosseous Regions of the Craniovertebral Junction Visualized by 3-Dimensional Computed Tomographic Angiography Analysis of 100 Consecutive Surgical Cases and Review of the Literature. Spine. 2012; 37: E1389-E97. | Population |

|     |                                                                                                                                                                                                                                                        |            |
|-----|--------------------------------------------------------------------------------------------------------------------------------------------------------------------------------------------------------------------------------------------------------|------------|
| 525 | Yu YH, Hsu YH, Chou YC, et al. Sustained relief of pain from osteosynthesis surgery of rib fracture by using biodegradable lidocaine-eluting nanofibrous membranes. <i>Nanomedicine: Nanotechnology, Biology, and Medicine</i> . 2016; 12: 1785-93.    | Population |
| 526 | Zaidenberg EE, Rossi LA, Bongiovanni SL, Tanoira I, Maignon G and Ranalletta M. Snapping scapular syndrome secondary to rib intramedullary fixation device. <i>International Journal of Surgery Case Reports</i> . 2015; 17: 158-60.                   | Population |
| 527 | Zanette G, Micaglio M, Behr AU, Manani G and Facco E. Multiple regional anaesthesia techniques in a high risk surgical patient. [Italian, English]. <i>Acta Anaesthesiologica Italica / Anaesthesia and Intensive Care in Italy</i> . 2008; 59: 174-9. | Population |
| 528 | Zhang H, Zhao Q, He B, Liu J, Hao D and Guo H. Optimal timing for type C3 thoracic fractures with posterior surgical approach: a retrospective cohort study. <i>Journal of Orthopaedic Science</i> . 2015; 20: 689-94.                                 | Population |
| 529 | Zong ZW, Bao QW, Liu HY, et al. Diagnosis and treatment of rare complications of pelvic fractures. <i>Chinese Journal of Traumatology - English Edition</i> . 2016; 19: 199-205.                                                                       | Population |
| 530 | Jiang B, Zhu R, Cao Q and Pan H. Severe thoracic spinal fracture-dislocation without neurological symptoms and costal fractures: A case report and review of the literature. <i>Journal of Medical Case Reports</i> . 2014; 8 (1) (no pagination).     | Population |
| 531 | Manzano JL, Bolanos J, Lubillo S, Romero F and Jato N. Internal costal fixation of fractured ribs in a 6-year-old patient. <i>Crit Care Med</i> . 1982; 10: 67-8.                                                                                      | Population |
| 532 | Pierce MC, Kaczor K, Lohr D, Richter K and Starling SP. A Practical Guide to Differentiating Abusive From Accidental Fractures: An Injury Plausibility Approach. <i>Clinical Pediatric Emergency Medicine</i> . 2012; 13: 166-77.                      | Population |
| 533 | Sartorelli KH and Vane DW. The Diagnosis and Management of Children with Blunt Injury of the Chest. <i>Seminars in Pediatric Surgery</i> . 2004; 13: 98-105.                                                                                           | Population |
| 534 | Yasuda R, Okada H, Shirai K, et al. Comparison of two pediatric flail chest cases. <i>Scandinavian Journal of Trauma Resuscitation &amp; Emergency Medicine</i> . 2015; 23.                                                                            | Population |
| 535 | Matshes EW and Lew EO. Do Resuscitation-Related Injuries Kill Infants and Children? <i>American Journal of Forensic Medicine and Pathology</i> . 2010; 31: 178-85.                                                                                     | Population |
| 536 | Gauger EM, Hill BW, Lafferty PM and Cole PA. Outcomes after operative management of symptomatic rib nonunion. <i>J Orthop Trauma</i> . 2015; 29: 283-9.                                                                                                | Population |
| 537 | Fabricant L, Ham B, Mullins R and Mayberry J. Prospective clinical trial of surgical intervention for painful rib fracture nonunion. <i>Am Surg</i> . 2014; 80: 580-6.                                                                                 | Population |

|     |                                                                                                                                                                                                                                                |                   |
|-----|------------------------------------------------------------------------------------------------------------------------------------------------------------------------------------------------------------------------------------------------|-------------------|
| 538 | Ahmed Z. On internal fixation for flail chest - Reply. <i>Journal of Thoracic and Cardiovascular Surgery</i> . 1996; 112: 850-.                                                                                                                | Publication Type  |
| 539 | Doben AR and Pieracci FM. Reply to "open reduction and internal fixation of rib fractures in polytrauma patients with flail chest" by DeFrest et al. <i>American Journal of Surgery</i> . 2016.                                                | Publication Type  |
| 540 | Fabian TC, Hawkins M, Bland K, et al. Discussion. <i>Am Surg</i> . 2007; 73: 596-7.                                                                                                                                                            | Publication Type  |
| 541 | Haasler GB. Use of 3.5-mm acetabular reconstruction plates for internal fixation of flail chest injuries - Invited commentary. <i>Ann Thorac Surg</i> . 1998; 65: 1474-.                                                                       | Publication Type  |
| 542 | Hajj-Chahine J, Jayle C, Houmaida H and Corbi P. eComment. Titanium devices in children. <i>Interact Cardiovasc Thorac Surg</i> . 2012; 15: 595.                                                                                               | Publication Type  |
| 543 | Mayberry J. Invited Commentary: Early Stabilization of Flail Chest With Locked Plate Fixation. <i>J Orthop Trauma</i> . 2011; 25: 648-.                                                                                                        | Publication Type  |
| 544 | Mayberry J and Ham B. Editorial comment. <i>Journal of Trauma - Injury, Infection and Critical Care</i> . 2011; 71: 1552.                                                                                                                      | Publication Type  |
| 545 | Mayberry JC. Editorial comment. <i>Journal of Trauma - Injury, Infection and Critical Care</i> . 2009; 67: 13.                                                                                                                                 | Publication Type  |
| 546 | Oyarzun JR, Bush AP, McCormick JR and Bolanowski PJP. Reconstruction plates for internal fixation of flail chest - Reply. <i>Ann Thorac Surg</i> . 1998; 66: 2158-.                                                                            | Publication Type  |
| 547 | Bastos R, Calhoon JH and Baisden CE. Flail Chest and Pulmonary Contusion. <i>Seminars in Thoracic and Cardiovascular Surgery</i> . 2008; 20: 39-45.                                                                                            | Literature Review |
| 548 | Bemelman M, Poeze M, Blokhuis TJ and Leenen LPH. Historic overview of treatment techniques for rib fractures and flail chest. <i>European Journal of Trauma and Emergency Surgery</i> . 2010; 36: 407-15.                                      | Literature Review |
| 549 | Fitzpatrick DC, Denard PJ, Phelan D, Long WB, Madey SM and Bottlang M. Operative stabilization of flail chest injuries: review of literature and fixation options. <i>European Journal of Trauma and Emergency Surgery</i> . 2010; 36: 427-33. | Literature Review |
| 550 | Forward DP, Ollivere BJ, Ng JWG, Coughlin TA and Rollins KE. Current concepts in rib fracture fixation. <i>Bone &amp; Joint</i> 360. 2016; 5: 2-7.                                                                                             | Literature Review |

|     |                                                                                                                                                                                    |                   |
|-----|------------------------------------------------------------------------------------------------------------------------------------------------------------------------------------|-------------------|
| 551 | Fowler TT, Taylor BC, Bellino MJ and Althausen PL. Surgical Treatment of Flail Chest and Rib Fractures. Journal of the American Academy of Orthopaedic Surgeons. 2014; 22: 751-60. | Literature Review |
| 552 | Gasparri MG, Tisol WB and Haasler GB. Rib stabilization: lessons learned. European Journal of Trauma and Emergency Surgery. 2010; 36: 435-40.                                      | Literature Review |
| 553 | Kiraly L and Schreiber M. Management of the crushed chest. Crit Care Med. 2010; 38: S469-S77.                                                                                      | Literature Review |
| 554 | Lafferty PM, Anavian J, Will RE and Cole PA. Operative treatment of chest wall injuries: indications, technique, and outcomes. J Bone Joint Surg Am. 2011; 93: 97-110.             | Literature Review |
| 555 | Marasco S and Saxena P. Surgical rib fixation - Technical aspects. Injury. 2015; 46: 929-32.                                                                                       | Literature Review |
| 556 | Mayberry JC and Trunkey DD. The fractured rib in chest wall trauma. Chest Surgery Clinics of North America. 1997; 7: 239-61.                                                       | Literature Review |
| 557 | Nirula R, Diaz Jr JJ, Trunkey DD and Mayberry JC. Rib fracture repair: Indications, technical issues, and future directions. World J Surg. 2009; 33: 14-22.                        | Literature Review |
| 558 | Nirula R and Mayberry JC. Rib fracture fixation: Controversies and technical challenges. Am Surg. 2010; 76: 793-802.                                                               | Literature Review |
| 559 | Parry NG, Moffat B and Vogt K. Blunt thoracic trauma: recent advances and outstanding questions. Current Opinion in Critical Care. 2015; 21: 544-8.                                | Literature Review |
| 560 | Pettiford BL, Luketich JD and Landreneau RJ. The Management of Flail Chest. Thorac Surg Clin. 2007; 17: 25-33.                                                                     | Literature Review |
| 561 | Pharaon KS, Marasco S and Mayberry J. Rib Fractures, Flail Chest, and Pulmonary Contusion. Current Trauma Reports. 2015; 1: 237-42.                                                | Literature Review |
| 562 | Qasim Z and Gwinnutt C. Flail chest: Pathophysiology and management. Trauma. 2009; 11: 63-70.                                                                                      | Literature Review |
| 563 | Ranasinghe AM, Hyde JAJ and Graham TR. Management of flail chest. Trauma. 2001; 3: 235-47.                                                                                         | Literature Review |

1  
2  
3  
4  
5  
6  
7  
8  
9  
10  
11  
12  
13  
14  
15  
16  
17  
18  
19  
20  
21  
22  
23  
24  
25  
26  
27  
28  
29  
30  
31  
32  
33  
34  
35  
36  
37  
38  
39  
40  
41  
42  
43  
44  
45  
46

|     |                                                                                                                                                                                                                                      |                   |
|-----|--------------------------------------------------------------------------------------------------------------------------------------------------------------------------------------------------------------------------------------|-------------------|
| 564 | Senekjian L and Nirula R. Rib Fracture Fixation: Indications and Outcomes. Critical Care Clinics. 2017; 33: 153-65.                                                                                                                  | Literature Review |
| 565 | Simon B, Ebert J, Bokhari F, et al. Management of pulmonary contusion and flail chest: An Eastern Association for the Surgery of Trauma practice management guideline. Journal of Trauma and Acute Care Surgery. 2012; 73: S351-S61. | Literature Review |
| 566 | Sirmali M, Turut H, Topcu S, et al. A comprehensive analysis of traumatic rib fractures: morbidity, mortality and management. Eur J Cardiothorac Surg. 2003; 24: 133-8.                                                              | Literature Review |
| 567 | Zreik NH, Francis MI, Ray A, Rogers BA and Ricketts DM. Blunt chest trauma: bony injury in the thorax. British Journal of Hospital Medicine. 2016; 77: 72-7.                                                                         | Literature Review |

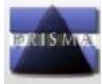

# PRISMA 2009 Checklist

| Section/topic                      | #  | Checklist item                                                                                                                                                                                                                                                                                              | Reported on page # |
|------------------------------------|----|-------------------------------------------------------------------------------------------------------------------------------------------------------------------------------------------------------------------------------------------------------------------------------------------------------------|--------------------|
| <b>TITLE</b>                       |    |                                                                                                                                                                                                                                                                                                             |                    |
| Title                              | 1  | Identify the report as a systematic review, meta-analysis, or both.                                                                                                                                                                                                                                         | 1                  |
| <b>ABSTRACT</b>                    |    |                                                                                                                                                                                                                                                                                                             |                    |
| Structured summary                 | 2  | Provide a structured summary including, as applicable: background; objectives; data sources; study eligibility criteria, participants, and interventions; study appraisal and synthesis methods; results; limitations; conclusions and implications of key findings; systematic review registration number. | 2                  |
| <b>INTRODUCTION</b>                |    |                                                                                                                                                                                                                                                                                                             |                    |
| Rationale                          | 3  | Describe the rationale for the review in the context of what is already known.                                                                                                                                                                                                                              | 3                  |
| Objectives                         | 4  | Provide an explicit statement of questions being addressed with reference to participants, interventions, comparisons, outcomes, and study design (PICOS).                                                                                                                                                  | 3                  |
| <b>METHODS</b>                     |    |                                                                                                                                                                                                                                                                                                             |                    |
| Protocol and registration          | 5  | Indicate if a review protocol exists, if and where it can be accessed (e.g., Web address), and, if available, provide registration information including registration number.                                                                                                                               | 3                  |
| Eligibility criteria               | 6  | Specify study characteristics (e.g., PICOS, length of follow-up) and report characteristics (e.g., years considered, language, publication status) used as criteria for eligibility, giving rationale.                                                                                                      | 4                  |
| Information sources                | 7  | Describe all information sources (e.g., databases with dates of coverage, contact with study authors to identify additional studies) in the search and date last searched.                                                                                                                                  | 4-5                |
| Search                             | 8  | Present full electronic search strategy for at least one database, including any limits used, such that it could be repeated.                                                                                                                                                                               | S1                 |
| Study selection                    | 9  | State the process for selecting studies (i.e., screening, eligibility, included in systematic review, and, if applicable, included in the meta-analysis).                                                                                                                                                   | 5                  |
| Data collection process            | 10 | Describe method of data extraction from reports (e.g., piloted forms, independently, in duplicate) and any processes for obtaining and confirming data from investigators.                                                                                                                                  | 5-6                |
| Data items                         | 11 | List and define all variables for which data were sought (e.g., PICOS, funding sources) and any assumptions and simplifications made.                                                                                                                                                                       | 5                  |
| Risk of bias in individual studies | 12 | Describe methods used for assessing risk of bias of individual studies (including specification of whether this was done at the study or outcome level), and how this information is to be used in any data synthesis.                                                                                      | 6                  |
| Summary measures                   | 13 | State the principal summary measures (e.g., risk ratio, difference in means).                                                                                                                                                                                                                               | 5                  |
| Synthesis of results               | 14 | Describe the methods of handling data and combining results of studies, if done, including measures of consistency (e.g., $I^2$ ) for each meta-analysis.                                                                                                                                                   | 6                  |

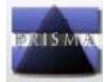

# PRISMA 2009 Checklist

1  
2  
3  
4  
5  
6  
7  
8  
9  
10  
11  
12  
13  
14  
15  
16  
17  
18  
19  
20  
21  
22  
23  
24  
25  
26  
27  
28  
29  
30  
31  
32  
33  
34  
35  
36  
37  
38  
39  
40  
41  
42  
43  
44  
45  
46  
47

| Section/topic                 | #  | Checklist item                                                                                                                                                                                           | Reported on page # |
|-------------------------------|----|----------------------------------------------------------------------------------------------------------------------------------------------------------------------------------------------------------|--------------------|
| Risk of bias across studies   | 15 | Specify any assessment of risk of bias that may affect the cumulative evidence (e.g., publication bias, selective reporting within studies).                                                             | 6                  |
| Additional analyses           | 16 | Describe methods of additional analyses (e.g., sensitivity or subgroup analyses, meta-regression), if done, indicating which were pre-specified.                                                         | N/A                |
| <b>RESULTS</b>                |    |                                                                                                                                                                                                          |                    |
| Study selection               | 17 | Give numbers of studies screened, assessed for eligibility, and included in the review, with reasons for exclusions at each stage, ideally with a flow diagram.                                          | 7                  |
| Study characteristics         | 18 | For each study, present characteristics for which data were extracted (e.g., study size, PICOS, follow-up period) and provide the citations.                                                             | 8-13               |
| Risk of bias within studies   | 19 | Present data on risk of bias of each study and, if available, any outcome level assessment (see item 12).                                                                                                | 16-17              |
| Results of individual studies | 20 | For all outcomes considered (benefits or harms), present, for each study: (a) simple summary data for each intervention group (b) effect estimates and confidence intervals, ideally with a forest plot. | 17-18, 24-25, 27   |
| Synthesis of results          | 21 | Present results of each meta-analysis done, including confidence intervals and measures of consistency.                                                                                                  | 17-33              |
| Risk of bias across studies   | 22 | Present results of any assessment of risk of bias across studies (see Item 15).                                                                                                                          | 14-16              |
| Additional analysis           | 23 | Give results of additional analyses, if done (e.g., sensitivity or subgroup analyses, meta-regression [see Item 16]).                                                                                    | N/A                |
| <b>DISCUSSION</b>             |    |                                                                                                                                                                                                          |                    |
| Summary of evidence           | 24 | Summarize the main findings including the strength of evidence for each main outcome; consider their relevance to key groups (e.g., healthcare providers, users, and policy makers).                     | 33-34              |
| Limitations                   | 25 | Discuss limitations at study and outcome level (e.g., risk of bias), and at review-level (e.g., incomplete retrieval of identified research, reporting bias).                                            | 36                 |
| Conclusions                   | 26 | Provide a general interpretation of the results in the context of other evidence, and implications for future research.                                                                                  | 37                 |
| <b>FUNDING</b>                |    |                                                                                                                                                                                                          |                    |
| Funding                       | 27 | Describe sources of funding for the systematic review and other support (e.g., supply of data); role of funders for the systematic review.                                                               | 37                 |

From: Moher D, Liberati A, Tetzlaff J, Altman DG, The PRISMA Group (2009). Preferred Reporting Items for Systematic Reviews and Meta-Analyses: The PRISMA Statement. PLoS Med 6(7): e1000097. doi:10.1371/journal.pmed1000097

For more information, visit: [www.prisma-statement.org](http://www.prisma-statement.org).

# BMJ Open

## A systematic review of systematic reviews for effectiveness of internal fixation for flail chest and rib fractures in adults

|                                 |                                                                                                                                                                                                                                                                                                                                                                                                                                                                                                                                                                    |
|---------------------------------|--------------------------------------------------------------------------------------------------------------------------------------------------------------------------------------------------------------------------------------------------------------------------------------------------------------------------------------------------------------------------------------------------------------------------------------------------------------------------------------------------------------------------------------------------------------------|
| Journal:                        | <i>BMJ Open</i>                                                                                                                                                                                                                                                                                                                                                                                                                                                                                                                                                    |
| Manuscript ID                   | bmjopen-2018-023444.R1                                                                                                                                                                                                                                                                                                                                                                                                                                                                                                                                             |
| Article Type:                   | Research                                                                                                                                                                                                                                                                                                                                                                                                                                                                                                                                                           |
| Date Submitted by the Author:   | 02-Dec-2018                                                                                                                                                                                                                                                                                                                                                                                                                                                                                                                                                        |
| Complete List of Authors:       | Ingoe, Helen; York Trials Unit, Health Sciences; The James Cook University Hospital, Trauma and Orthopaedics<br>Coleman, Elizabeth; York Trials Unit, Health Sciences<br>Eardley, Willaim; The James Cook University Hospital, Trauma and Orthopaedics; York Trials Unit, Health Sciences<br>Rangan, Amar; York Trials Unit, Health Sciences; University of Oxford Nuffield Department of Orthopaedics Rheumatology and Musculoskeletal Sciences<br>Hewitt, Catherine; York Trials Unit, Health Sciences<br>McDaid, Catriona; University of York, York Trials Unit |
| <b>Primary Subject Heading</b>: | Surgery                                                                                                                                                                                                                                                                                                                                                                                                                                                                                                                                                            |
| Secondary Subject Heading:      | Emergency medicine, Evidence based practice                                                                                                                                                                                                                                                                                                                                                                                                                                                                                                                        |
| Keywords:                       | Rib fracture, Flail Chest, Internal fixation, Systematic review, mechanical ventilation, Multiple rib fractures                                                                                                                                                                                                                                                                                                                                                                                                                                                    |
|                                 |                                                                                                                                                                                                                                                                                                                                                                                                                                                                                                                                                                    |

SCHOLARONE™  
Manuscripts



1  
2  
3 **A SYSTEMATIC REVIEW OF SYSTEMATIC REVIEWS FOR EFFECTIVENESS**  
4 **OF INTERNAL FIXATION FOR FLAIL CHEST AND RIB FRACTURES IN**  
5 **ADULTS**  
6  
7  
8  
9

10  
11 Corresponding author

12  
13 Helen MA Ingoe <sup>1,2</sup> [helen.ingoe@york.ac.uk](mailto:helen.ingoe@york.ac.uk) Telephone 01904 321830

14  
15 ORCID ID 0000-0003-1623-8489  
16

17  
18 Elizabeth Coleman <sup>1</sup> [izzy.coleman@york.ac.uk](mailto:izzy.coleman@york.ac.uk) ORCID ID 0000-0003-4210-1865  
19

20  
21 William Eardley <sup>1,2</sup> [william.eardley@york.ac.uk](mailto:william.eardley@york.ac.uk) ORCID ID 0000-0003-1980-8520  
22

23  
24 Amar Rangan <sup>1,2,3</sup> [amar.rangan@york.ac.uk](mailto:amar.rangan@york.ac.uk) ORCID ID 0000-0003-0412-2614  
25

26  
27 Catherine Hewitt <sup>1</sup> [catherine.hewitt@york.ac.uk](mailto:catherine.hewitt@york.ac.uk) ORCID ID 0000-0002-0415-3536  
28

29  
30 Catriona McDaid <sup>1</sup> [catriona.mcdaid@york.ac.uk](mailto:catriona.mcdaid@york.ac.uk) ORCID ID 0000-0002-3751-7260  
31

32  
33 **AFFILIATIONS**  
34

35  
36 <sup>1</sup> York Trials Unit, Department of Health Sciences, ARRC Building, University of York,  
37 Heslington, York, YO10 5DD  
38

39  
40 <sup>2</sup> The James Cook University Hospital, Marton Road, Middlesbrough, TS4 3BW  
41

42  
43 <sup>3</sup> NDORMS, University of Oxford, research supported by the National Institute for  
44 Health Research (NIHR) Oxford Biomedical Research Centre (BRC)  
45  
46  
47  
48  
49  
50  
51  
52  
53  
54  
55  
56  
57

58  
59 **WORD COUNT** 3966  
60

## ABSTRACT

### Objectives

Multiple systematic reviews have reported on the impact of rib fracture fixation in the presence of flail chest and multiple rib fractures, however this practice remains controversial. Our aim is to synthesise the effectiveness of surgical fixation of rib fractures as evidenced by systematic reviews.

### Design

A systematic search identified systematic reviews comparing effectiveness of rib fracture fixation with non-operative management of adults with flail chest or multiple rib fractures. MEDLINE, EMBASE, Cochrane Database of Systematic Reviews (CDSR) and Science Citation Index were last searched 17<sup>th</sup> March 2017. Risk of bias was assessed using the ROBIS tool. The primary outcome was duration of mechanical ventilation.

### Results

Twelve systematic reviews were included, consisting of 3 unique randomised controlled trials, 19 non-randomised studies). Length of mechanical ventilation was shorter in the fixation group compared to the non-operative group in flail chest; pooled estimates ranged from -4.52 days, 95% CI [-5.54, -3.5] to -7.5 days, 95% CI [-9.9, -5.5]. Pneumonia, length of hospital and ICU stay all showed a statistically significant improvement in favour of fixation for flail chest; however, all outcomes in favour of fixation had substantial heterogeneity. There was no statistically significant difference between groups in mortality. Two systematic reviews included one non-randomised studies of multiple rib fracture population; due to limited evidence the benefits with surgery are uncertain.

### Conclusions

Synthesis of the reviews has shown some potential improvement in patient outcomes with flail chest after fixation. For future review updates, meta-analysis for effectiveness may need to take into account indications and timing of surgery as a subgroup analysis to address clinical heterogeneity between primary studies. Further robust evidence is

1 required before conclusions can be drawn of the effectiveness of surgical fixation for flail  
2 chest and in particular, multiple rib fractures.  
3  
4

## 5 **Study Registration**

6 PROSPERO ID CRD 42016053494  
7  
8  
9

## 10 **KEY WORDS**

11 Rib fracture; Flail chest; Multiple rib fractures; Internal fixation; Systematic review;  
12  
13  
14  
15  
16  
17  
18  
19  
20  
21  
22  
23  
24  
25  
26  
27  
28  
29  
30  
31  
32  
33  
34  
35  
36  
37  
38  
39  
40  
41  
42  
43  
44  
45  
46  
47  
48  
49  
50  
51  
52  
53  
54  
55  
56  
57  
58  
59  
60

## 10 **STRENGTHS AND LIMITATIONS OF THIS STUDY**

- Multiple databases were searched for studies and study selection was undertaken by two researchers, reducing the risk of error
- Risk of bias of studies was assessed using the ROBIS tool by two researchers
- Primary research within the reviews was mapped to identify if the reviews were based on the same primary evidence
- Reviews were included regardless of risk of bias

## 36 **INTRODUCTION**

37 Multiple rib fractures (adjacent unifocal fractures) and flail chest (three or more adjacent  
38 bifocal rib fractures with paradoxical chest wall movement) have high mortality (18.7%)  
39 due to the associated complications of acute respiratory distress syndrome, pneumonia  
40 and haemorrhage.<sup>1</sup> Chest trauma accounts for 15% of all trauma admissions<sup>2</sup> most  
41 commonly high-energy transfer injury as a result of a road traffic accidents (57.01%) but  
42 also from low energy falls (22.96%).<sup>1</sup> Flail chest in particular has a high mortality rate as  
43 chest wall disruption causes an increase in the work of breathing for patients who are  
44 often in significant pain.  
45  
46  
47  
48  
49  
50  
51  
52  
53  
54  
55

56 Current treatment options for severe chest injury are mainly supportive, including  
57 multimodal analgesia and anaesthesia, as well as non-invasive and invasive ventilation.<sup>3</sup>  
58  
59  
60 Surgical fixation is thought to be beneficial to patients with respiratory failure,<sup>4</sup> intractable

1 pain<sup>5</sup> or if failing to wean from invasive ventilation secondary to chest trauma.<sup>6,7</sup> Fixation  
2 has potential to restore chest wall biomechanics and reduce the complications associated  
3 with poor ventilation and secretion clearance.<sup>7</sup> Due to the rapidly, albeit heterogeneous,  
4 growing evidence base from multiple systematic reviews it is essential to synthesise  
5 evidence for this intervention to ascertain safety and efficacy.  
6  
7  
8  
9  
10

11 This report is part of a wider systematic review to (i) identify and synthesise the evidence  
12 of the effectiveness of surgical rib fracture fixation, (ii) evaluate the evidence for  
13 indications and timing of fixation, and (iii) identify the outcomes reported in the literature.  
14 Systematic reviews and primary studies were eligible for inclusion. This paper maps and  
15 synthesises this evidence from systematic reviews assessing the effectiveness of fixation  
16 of rib fractures.  
17  
18  
19  
20  
21  
22  
23  
24  
25

## 26 **METHODS**

27 The review was undertaken systematically using the methods described by the Centre for  
28 Reviews and Dissemination.<sup>8</sup> The protocol was registered on PROSPERO and can be  
29 accessed at  
30  
31  
32  
33  
34

35 [https://www.crd.york.ac.uk/PROSPERO/display\\_record.asp?ID=CRD42016053494](https://www.crd.york.ac.uk/PROSPERO/display_record.asp?ID=CRD42016053494).  
36  
37

## 38 **Eligibility criteria**

### 39 **Population**

40 Adults (over 18 years) who have sustained one or more rib fractures following blunt chest  
41 trauma, with or without pulmonary contusion were eligible. Single rib fracture, multiple rib  
42 fractures and flail chest injuries were included but treated as separate injuries and  
43 therefore reported and analysed separately. Patients with penetrating injuries were  
44 excluded. Studies of mixed populations with penetrating and non-penetrating injuries were  
45 included only if data were presented separately for the two groups. Surgery for chronic  
46 non-union was excluded.  
47  
48  
49  
50  
51  
52  
53  
54  
55  
56  
57

### 58 **Intervention**

59  
60

1 Any method of internal surgical fixation such as plate or strut fixation; metal or synthetic  
2 material including intramedullary splints and suture fixation were eligible for inclusion.  
3  
4

## 5 6 Comparator

7  
8  
9 External surgical fixation (traction methods, splints and Hoffman style pin and bar fixation)  
10 and non-surgical management (such as supportive ventilation, epidural and regional  
11 anaesthesia).  
12  
13

## 14 15 16 Outcomes

17  
18  
19 All outcomes were eligible (e.g. mortality, pain and pneumonia). The primary outcome of  
20 interest was duration of mechanical ventilation due to the close relationship with mortality  
21 and morbidity of ventilator associated complications.  
22  
23

## 24 25 26 Study design:

27  
28  
29 *Inclusion:* Systematic reviews were included if they specified a search strategy in at least  
30 one literature database and included primary research. No restrictions were placed on the  
31 study design of the primary studies.  
32  
33

34  
35  
36 *Exclusion:* Literature reviews that did not have a defined research question, search  
37 strategy or defined process of selecting articles.  
38  
39

## 40 41 **Search strategy**

42  
43 MEDLINE including PreMEDLINE, EMBASE, Cochrane Database of Systematic Reviews  
44 (CDSR) and Science Citation Index. Clinical guidance, policy documents and relevant  
45 databases such as NICE Evidence, the UK Department of Health policy content, National  
46 Clinical Guideline Centre, and Scottish Intercollegiate Guidelines Network (SIGN) were  
47 searched on 14 December 2016 and updated on 13 March 2017. The Conference  
48 Proceedings Citation Index was also searched for unpublished literature.  
49  
50  
51  
52  
53  
54  
55  
56  
57  
58  
59  
60

1 The start date for the MEDLINE searches was 1976 as that was the year that Advance  
2 Trauma Life Support was introduced internationally, incorporating new methods of  
3 resuscitation which have significantly improved outcomes.  
4  
5

6  
7  
8 The search strategy, developed for MEDLINE, is provided in **Supplementary File 1** and  
9  
10 was adapted to run appropriately on other databases. To identify relevant further reviews  
11  
12 reference lists of included studies were assessed for eligibility.  
13  
14

### 15 **Selection**

16  
17 Searches were downloaded into Endnote X7 (Clarivate Analytics, Version 7.1 release  
18 date 2/04/2014) and de-duplicated. Two researchers (HI and EC) independently screened  
19 titles and abstracts. Any paper classified as potentially eligible by either reviewer was  
20 ordered as a full text and independently screened by both reviewers. It was originally  
21 planned to have second screening of only 50% but resources allowed for full duplicate  
22 screening. A third researcher reviewed disagreements (CM) where a consensus could not  
23 be reached between the researchers.  
24  
25  
26  
27  
28  
29  
30  
31  
32

### 33 **Data extraction**

34  
35 Extracted data included study characteristics, patient characteristics, intervention,  
36 comparator, outcome measures, duration of follow up, effect estimates, standard errors  
37 (SE) and confidence intervals (CI) as available.  
38  
39  
40  
41

42 One researcher completed data extraction (HI); a second researcher cross-checked 50%  
43 (EC). Discrepancies were cross-checked by both researchers at a second review and a  
44 consensus reached.  
45  
46  
47  
48

### 49 **Risk of bias**

50  
51 Quality assessment with the ROBIS Tool<sup>9</sup> was undertaken by one researcher (HI) and  
52 checked by a second (CM). Discrepancies were resolved by discussion.  
53  
54  
55  
56

### 57 **Data synthesis**

1 All types of internal surgical fixation were synthesised as one group. Flail chest and  
2 multiple rib fractures are considered different injuries and were synthesised separately for  
3 each outcome extracted. Each outcome was narratively synthesised including number of  
4 reviews using the outcome and effect estimates with 95% confidence intervals from the  
5 source review. Important numerical data was presented in tables for all outcomes  
6 measured. All outcomes that were reported in the reviews were included in the report to  
7 avoid reporting bias.<sup>10</sup> Although not fully applicable, reporting was in accordance as much  
8 as possible with the PRISMA statement.<sup>11</sup>

### 18 **Protocol Deviations**

20 The registered protocol encompasses a larger body of work which includes synthesis of  
21 primary research for effectiveness, indications for surgery, timing of surgery and mapping  
22 of outcome measures. Only the synthesis of systematic reviews is reported here. Although  
23 all outcomes were extracted and presented in tables only those that were measured in  
24 two or more studies were narratively synthesised.

### 32 **Patient involvement**

34 Patients were not involved in the preparation or conduct of this review.

## RESULTS

Electronic searches identified 791 records; an additional 39 records were collected following reference checking. The full text screening identified 12 systematic reviews eligible for inclusion, there were 21 papers excluded because they were not classified as systematic reviews (Figure 1) .Supplementary File 2 lists the excluded studies.

### Review characteristics

Eleven systematic reviews and one rapid evidence synthesis<sup>12</sup>, published between 2010 and June 2016, met the inclusion criteria. Table 1 provides a summary of review characteristics. Three of the reviews<sup>13 14 15</sup> were presented as best evidence topics<sup>16</sup>



Table 1 Review characteristics

| Review Year Country                                                  | Review aim                                                                                                                                                     | Search strategy                                                                                                                                                                                                                                                                            | Studies and participants                                                                                                                      | PICOS                                                                                                                                                                                             | Risk of bias                                                      | Authors' Conclusions                                                                                                                                                                                                                                                                                                           |
|----------------------------------------------------------------------|----------------------------------------------------------------------------------------------------------------------------------------------------------------|--------------------------------------------------------------------------------------------------------------------------------------------------------------------------------------------------------------------------------------------------------------------------------------------|-----------------------------------------------------------------------------------------------------------------------------------------------|---------------------------------------------------------------------------------------------------------------------------------------------------------------------------------------------------|-------------------------------------------------------------------|--------------------------------------------------------------------------------------------------------------------------------------------------------------------------------------------------------------------------------------------------------------------------------------------------------------------------------|
| <b>Swart</b> <sup>17</sup><br><b>2016</b><br><b>USA</b>              | To perform a meta-analysis of high quality literature to evaluate both economic and medical benefits of early fixation of rib fractures in severe chest trauma | PubMed, Embase, Medline and Scopus,<br>No search start date<br>Last search date 1 June 2016<br>Search terms defined, No limitations described<br>Evidence of hand searching<br>Eligibility criteria - over 18 years of age and studies comparing operative vs non-operative treatment      | 3 RCT n =123<br>14 Case Control<br>3 Case Series                                                                                              | <b>Population</b><br>Acute flail chest 18 years or old<br><br><b>Intervention</b><br>Operative Fixation<br><br><b>Comparator</b><br>Non-operative<br><br><b>Studies Type</b><br>All study designs | No evidence of quality assessment                                 | Acute ORIF of rib fractures in patients with flail chest injuries results in reduced mortality and medical complications in conjunction with being cost effective intervention.                                                                                                                                                |
| <b>Schuermans</b> <sup>18</sup><br><b>2016</b><br><b>Netherlands</b> | Investigate how operative management improves patient care for adults with flail chest.                                                                        | PubMed, Trip database, Google Scholar<br>No search start date<br>Last search date November 2015<br>Search terms defined, No limitations described<br>Evidence of reference checking<br>Eligibility criteria - studies comparing operative vs non-operative treatment, RCT only and English | 3 RCT n = 123                                                                                                                                 | <b>Population</b><br>Acute flail chest<br><br><b>Intervention</b><br>Operative Fixation<br><br><b>Comparator</b><br>Non-operative<br><br><b>Studies Type</b><br>RCTs                              | Quality assessment completed but criteria and explanation unclear | The operative management group showed a significant lower incidence of pneumonia, whereas mortality rate did not differ between treatment groups.                                                                                                                                                                              |
| <b>Schulte</b> <sup>13</sup> <b>2016</b><br><b>UK</b>                | In patients with acute flail chest does surgical rib fixation improve outcomes in terms of morbidity and mortality?                                            | OVID MEDLINE®<br>Search start date 1946<br>Last search date January 2016<br>Search terms defined<br>Search strategy description minimal, No limitations described<br>No evidence of reference checking<br>No specific inclusion or exclusion criteria defined.                             | 1 Meta-analysis by separate author<br>1 RCT n=123 (2 further coded as RCT which are non-randomised studies)<br>3 Retrospective cohort studies | <b>Population</b><br>Acute flail chest<br><br><b>Intervention</b><br>Operative Fixation<br><b>Comparator</b><br>Non-operative<br><br><b>Studies Type</b><br>Unclear                               | No evidence of quality assessment                                 | Surgical stabilization of flail chest in thoracic trauma patients has beneficial effects with respect to reduced ventilatory support, shorter intensive care and hospital stay, reduced incidence of pneumonia and septicaemia, decreased risk of chest deformity and an overall reduced mortality when compared with patients |

|                                                                  |                                                                                                                                                                   |                                                                                                                                                                                                                                                                                                                                                                     |                                                                                          |                                                                                                                                                                                                                                                                                                     |                                                                        |                                                                                                                                                                                                                                                                                                                                                         |
|------------------------------------------------------------------|-------------------------------------------------------------------------------------------------------------------------------------------------------------------|---------------------------------------------------------------------------------------------------------------------------------------------------------------------------------------------------------------------------------------------------------------------------------------------------------------------------------------------------------------------|------------------------------------------------------------------------------------------|-----------------------------------------------------------------------------------------------------------------------------------------------------------------------------------------------------------------------------------------------------------------------------------------------------|------------------------------------------------------------------------|---------------------------------------------------------------------------------------------------------------------------------------------------------------------------------------------------------------------------------------------------------------------------------------------------------------------------------------------------------|
|                                                                  |                                                                                                                                                                   |                                                                                                                                                                                                                                                                                                                                                                     |                                                                                          |                                                                                                                                                                                                                                                                                                     |                                                                        | who received non-operative management.                                                                                                                                                                                                                                                                                                                  |
| <b>Coughlin</b> <sup>19</sup><br><b>2016</b><br><b>UK</b>        | Compare the efficacy of flail chest surgical stabilisation to non-operative management                                                                            | PubMed MEDLINE, Embase, Cochrane Library, clinical trials.gov.<br>No search start date<br>Last search date February 2015<br>Search terms defined, No limitations<br>Evidence of reference checking<br>Eligibility criteria - studies comparing operative vs non-operative treatment in flail chest and RCT only                                                     | 3 RCT n = 123                                                                            | <b>Population</b><br>Traumatic flail chest<br><br><b>Intervention</b><br>Surgical stabilisation of any kind<br><br><b>Comparator</b><br>Patients treated non-operatively by any other means<br><br><b>Studies Type</b><br>RCTs only                                                                 | Clear quality appraisal of the studies                                 | Surgical stabilisation for a traumatic flail chest is associated with significant clinical benefits including rate of pneumonia, length of hospital an ICU stay and duration of mechanical ventilation in this meta-analysis of three relatively small RCTs                                                                                             |
| <b>Unsworth</b> <sup>20</sup><br><b>2015</b><br><b>Australia</b> | To review the treatments for blunt chest trauma and their impact on patient and hospital outcomes. Specifically alludes to surgical stabilization of flail chest. | Cochrane, Medline, EMBASE and CINAHL databases<br>Search limited to 1990 onwards<br>Last search date March 2014<br>Search terms defined. Limited to humans and adults<br>Evidence of reference checking<br>Eligibility criteria - original research, blunt chest trauma, intervention for blunt chest trauma including a comparator and contained measured outcomes | 3 RCT n =123<br>5 Retrospective<br>Case Controls n= 642<br>1 Retrospective cohort n = 21 | <b>Population</b><br>Adult blunt chest trauma<br>Flail chest<br><br><b>Intervention</b><br>Multidisciplinary Intervention (Models of care, management intervention, care practices, care protocols)<br><br><b>Comparator</b><br>Other intervention not specified<br><br><b>Studies Type</b><br>RCTs | Some quality assessment completed but criteria and explanation unclear | Across the literature there were consistent improvements in patients with flail chest and surgical fixation with fewer days of mechanical ventilation, ICU-LOS and cost savings compared to non-operative techniques. Three out of nine studies were randomized controlled trials, and the level of evidence in all studies was primarily fair or good. |
| <b>De Lesquen</b> <sup>15</sup><br><b>2015</b><br><b>France</b>  | In flail chest is open reduction and internal fixation needed?                                                                                                    | Medline and Science Direct<br>Search start date limited to 1994 onwards<br>Last search date January 2014<br>Search Terms defined                                                                                                                                                                                                                                    | 2 Meta-analysis<br>3 RCT n = 123<br>1 prospective cohort n = 60                          | <b>Population</b><br>Blunt chest trauma. Flail chest<br><br><b>Intervention</b>                                                                                                                                                                                                                     | No evidence of quality assessment                                      | For flail chest, early surgical stabilization can be considered in patients who would require mechanical ventilation for >48 h                                                                                                                                                                                                                          |

|                                                        |                                                                                                                                  |                                                                                                                                                                                                                                                                                                                                                                                                                                                             |                                                  |                                                                                                                                                                                                                                                                                                                                                          |                                        |                                                                                                                                                                                                                                                                                                                                                                                                                                                                                                |
|--------------------------------------------------------|----------------------------------------------------------------------------------------------------------------------------------|-------------------------------------------------------------------------------------------------------------------------------------------------------------------------------------------------------------------------------------------------------------------------------------------------------------------------------------------------------------------------------------------------------------------------------------------------------------|--------------------------------------------------|----------------------------------------------------------------------------------------------------------------------------------------------------------------------------------------------------------------------------------------------------------------------------------------------------------------------------------------------------------|----------------------------------------|------------------------------------------------------------------------------------------------------------------------------------------------------------------------------------------------------------------------------------------------------------------------------------------------------------------------------------------------------------------------------------------------------------------------------------------------------------------------------------------------|
|                                                        |                                                                                                                                  | No evidence of hand searching or reference checking<br>Eligibility criteria - Exclusions of both child and vascular injuries                                                                                                                                                                                                                                                                                                                                | 5 Retrospective cohort n = 238                   | Open reduction and internal fixation<br><br><b>Comparator</b><br>Unclear<br><br><b>Studies Type</b><br>Unclear                                                                                                                                                                                                                                           |                                        |                                                                                                                                                                                                                                                                                                                                                                                                                                                                                                |
| <b>Cataneo 21</b><br><b>2015</b><br><b>Brazil</b>      | To evaluate the effectiveness and safety of surgical stabilization compared with clinical management for people with flail chest | Cochrane Injuries Group Specialised Register, CENTRAL, Medline, Embase, CINAHL, SCI, CPCI-S, Clinical trials.gov, ICTR<br>No search start date<br>Last search Date 12 <sup>th</sup> May 2014.<br>Search terms defined, No limitations<br>Evidence of reference checking<br>Eligibility criteria - RCTs.                                                                                                                                                     | 3 RCTs n = 123                                   | <b>Population</b><br>Adults or children with flail chest<br><b>Intervention</b><br>Surgical stabilisation of any kind<br><br><b>Comparator</b><br>Clinical management included any type of chest wall stabilization without surgical intervention such as straps or bags and any type of ventilatory assistance.<br><br><b>Studies Type</b><br>RCTs only | Clear quality appraisal of the studies | There was no evidence that surgical intervention reduced mortality in people with FC compared with nonsurgical management. There was some evidence that surgical intervention could reduce the risk of developing pneumonia and thoracic deformity; need for tracheostomy; duration of mechanical ventilation, length of ICU stay, and hospital stay; and chronic pain, but the trials to date have been small. There is an urgent need for larger high-quality randomized con-trolled trials. |
| <b>De Jong 22</b><br><b>2014</b><br><b>Netherlands</b> | To specify indications for rib fracture fixation of non-flail chests                                                             | Medline, Cochrane, Embase<br>Search start date limited to 2010<br>Last search date December 2013<br>Search terms defined, limited to year 2000 onwards.<br>Evidence of reference checking<br>Eligibility criteria - Studies included at least 10 participants who were surgically treated for non-flail chest rib fractures. Reported in English, Dutch, or German. Excluded were case reports, biomechanical studies, animal studies, and expert opinions. | 1 Case Control n = 60<br>2 Cohort studies n = 47 | <b>Population</b><br>Traumatic non-flail chest<br><br><b>Intervention</b><br>Surgical treatment of non-flail chest<br><br><b>Comparator</b><br>Unclear<br><br><b>Studies Type</b>                                                                                                                                                                        | No evidence of quality assessment      | The evidence for surgical treatment of non-flail chest rib fractures is limited                                                                                                                                                                                                                                                                                                                                                                                                                |

|                                                                |                                                                                                                                                                                               |                                                                                                                                                                                                                                                                                                                                                                                               |                                                                                                       |                                                                                                                                                                                                                            |                                                                                     |                                                                                                                                                                                                                                                                                                                                                                                                                                          |
|----------------------------------------------------------------|-----------------------------------------------------------------------------------------------------------------------------------------------------------------------------------------------|-----------------------------------------------------------------------------------------------------------------------------------------------------------------------------------------------------------------------------------------------------------------------------------------------------------------------------------------------------------------------------------------------|-------------------------------------------------------------------------------------------------------|----------------------------------------------------------------------------------------------------------------------------------------------------------------------------------------------------------------------------|-------------------------------------------------------------------------------------|------------------------------------------------------------------------------------------------------------------------------------------------------------------------------------------------------------------------------------------------------------------------------------------------------------------------------------------------------------------------------------------------------------------------------------------|
|                                                                |                                                                                                                                                                                               |                                                                                                                                                                                                                                                                                                                                                                                               |                                                                                                       | All studies with at least 10 surgically treated                                                                                                                                                                            |                                                                                     |                                                                                                                                                                                                                                                                                                                                                                                                                                          |
| <b>Slobogean</b> <sup>23</sup><br><b>2013</b><br><b>Canada</b> | Compare the critical care outcomes of surgical fixation to non-operative management in patients with flail chest injuries                                                                     | Medline, Embase, Cochrane Database of Systematic Reviews (CDSR), and the Cochrane Central, Register of Controlled Trials (CENTRAL)<br>No search start date<br>Last search date May 2011<br>No limitations<br>No evidence of reference checking or hand searching<br>Eligibility criteria - Comparator studies with more than 10 cases.                                                        | 2 RCT<br>1 case control n=60<br>8 Cohort n = 676                                                      | <b>Population</b><br>Acute flail chest<br><br><b>Intervention</b><br>Operative Fixation<br><br><b>Comparator</b><br>Conservative management<br><br><b>Studies Type</b><br>RCTs                                             | No evidence of quality assessment                                                   | Improved outcomes of multiple critical care outcomes with narrow confidence intervals but based on small retrospective studies. Suggests prospective RCT to overcome potential biases                                                                                                                                                                                                                                                    |
| <b>Leinicke</b> <sup>24</sup><br><b>2013</b><br><b>USA</b>     | Comparing operative to non-operative therapy in adult flail chest patients                                                                                                                    | MEDLINE (1966-2012), Embase (1947-2012), Scopus (all years), Cochrane Databases and ClinicalTrials.gov<br>Last search date February 2012<br>Search terms defined, limited to English and human studies<br>Evidence of reference checking<br>Eligibility criteria - studies comparing operative vs non-operative treatment in patients with flail chest. Excluded case reports and case series | 2 RCT<br>3 Case Control n=158<br>4 Cohort n = 303                                                     | <b>Population</b><br>Flail chest<br><br><b>Intervention</b><br>Operative Fixation<br><b>Comparator</b><br>Non-Operative<br><br><b>Studies Type</b><br>RCTs, cohort, and case-control trials                                | Clear quality appraisal of the studies                                              | As compared to non-operative therapy, operative fixation of FC is associated with reductions in DMV, LOS, mortality, and complications associated with prolonged MV. These findings support the need for an adequately powered clinical study to further define the role of this intervention                                                                                                                                            |
| <b>Girsowicz</b> <sup>14</sup><br><b>2012</b><br><b>France</b> | In patients over 45 years old with isolated, movable and painful rib fractures without true flail chest is surgical stabilization superior to non-operative management in improving outcomes? | OVID Medline 1948 –2011<br>Last search date June 2011<br>Search terms defined, limited to Human and English language<br>Evidence of reference checking<br>Eligibility criteria – excluded flail chest but inclusions not well described                                                                                                                                                       | 4 Retrospective cohort n= 107<br>1 non-systematic Review<br>1 Case control = 30<br>2 Case report n= 2 | <b>Population</b><br>Over 45 years old with isolated, movable and painful Rib fractures without true flail chest<br><br><b>Intervention</b><br>surgical stabilization<br><br><b>Comparator</b><br>non-operative management | Some comments on strengths and weaknesses but no quality or risk of bias assessment | Surgical stabilization in the management of isolated multiple non-flail and painful rib fractures improved outcomes (pain, respiratory function, quality of life and reduced socio-professional disability) Studies provided a low level of evidence (small studies with few numbers of patients and short-term follow-up or case reports). Large prospective controlled trials are thus necessary to confirm these encouraging results. |

1  
2  
3  
4  
5  
6  
7  
8  
9  
10  
11  
12  
13  
14  
15  
16  
17  
18  
19  
20  
21  
22  
23  
24  
25  
26  
27  
28  
29  
30  
31  
32  
33  
34  
35  
36  
37  
38  
39  
40  
41  
42  
43  
44  
45  
46

|                                                                                                                                                                                                                             |                                                                                                        |                                                                                                                                                                                                                                                                                                                                                                                                      |                                                                          |                                                                                                                                                                                                                                                                                                                                                                                                  |                                    |                                                                                |
|-----------------------------------------------------------------------------------------------------------------------------------------------------------------------------------------------------------------------------|--------------------------------------------------------------------------------------------------------|------------------------------------------------------------------------------------------------------------------------------------------------------------------------------------------------------------------------------------------------------------------------------------------------------------------------------------------------------------------------------------------------------|--------------------------------------------------------------------------|--------------------------------------------------------------------------------------------------------------------------------------------------------------------------------------------------------------------------------------------------------------------------------------------------------------------------------------------------------------------------------------------------|------------------------------------|--------------------------------------------------------------------------------|
|                                                                                                                                                                                                                             |                                                                                                        |                                                                                                                                                                                                                                                                                                                                                                                                      |                                                                          | <b>Studies Type</b><br>Unclear                                                                                                                                                                                                                                                                                                                                                                   |                                    |                                                                                |
| <b>NICE Evidence</b> <sup>12</sup><br><b>2010</b><br><b>UK</b>                                                                                                                                                              | To make recommendations about the safety and efficacy of surgical rib fracture fixation in flail chest | MEDLINE, PREMEDLINE, EMBASE, Cochrane Library<br>No search start date<br>Last search date May 2010<br>Search terms defined<br>No limitations<br>No evidence of reference checking but other searches performed<br>Eligibility criteria – clinical studies of patients with flail chest operated with metal rib reinforcements and published in English.<br>Excluded conference abstracts and reviews | 1 RCT<br>2 non randomized studies<br>4 case series<br>Total 225 patients | <b>Population</b><br>Flail chest<br><br><b>Intervention</b><br>Insertion of metal rib reinforcements.<br><b>Comparator</b><br>Unclear<br><br><b>Studies Type</b><br>Clinical studies were included.<br>Abstracts were excluded where no clinical outcomes were reported, or where the paper was a review, editorial, or a laboratory or animal study.<br>Conference abstracts were also excluded | No evidence of quality assessments | Surgical rib fracture fixation should be consider in patients with flail chest |
| <b>RCT = Randomised controlled trial, ORIF = Open reduction internal fixation, ICU = Intensive care unit, LOS = Length of stay, FC = Flail chest, MV = Mechanical ventilation, DMV = duration of mechanical ventilation</b> |                                                                                                        |                                                                                                                                                                                                                                                                                                                                                                                                      |                                                                          |                                                                                                                                                                                                                                                                                                                                                                                                  |                                    |                                                                                |

1 Nine reviews<sup>12 13 15 17-19 21 23 24</sup> evaluated the effectiveness of internal surgical fixation in  
2 patients with flail chest, two included patients with multiple rib fractures<sup>14 22</sup> and one  
3 included all rib fractures but only reported outcomes for flail chest.<sup>20</sup>  
4  
5  
6  
7

8 Three reviews<sup>18 19 21</sup> included only RCTs and eight included other study designs<sup>12-15 17 22-24</sup>  
9 (two systematic reviews, 19 non-randomised studies, 11 case series and two case  
10 reports) (Table 2). As would be expected, there was overlap across the reviews in the  
11 included primary studies. The total number of patients who had internal fixation in primary  
12 studies (excluding duplicate studies) was 1036 and there were 1187 controls.  
13  
14  
15  
16  
17  
18  
19  
20  
21  
22  
23  
24  
25  
26  
27  
28  
29  
30  
31  
32  
33  
34  
35  
36  
37  
38  
39  
40  
41  
42  
43  
44  
45  
46  
47  
48  
49  
50  
51  
52  
53  
54  
55  
56  
57  
58  
59  
60

For peer review only

Table 2 Primary studies included in each review and the number of included patients

| Review                   | Studies                              |                                       |                             |                                |                              |                            |                          |                            |                                   |                                   |                                   |                           |                                   |                                       |                             |                                     |                                   |                                   |                                      |                                   |                                  |                                |                               |                               |                               |                               |                             |                              |                                        |                                |                                     |                                       |                               |                               |                               |                                         |                                   |   |   |  |  |  |
|--------------------------|--------------------------------------|---------------------------------------|-----------------------------|--------------------------------|------------------------------|----------------------------|--------------------------|----------------------------|-----------------------------------|-----------------------------------|-----------------------------------|---------------------------|-----------------------------------|---------------------------------------|-----------------------------|-------------------------------------|-----------------------------------|-----------------------------------|--------------------------------------|-----------------------------------|----------------------------------|--------------------------------|-------------------------------|-------------------------------|-------------------------------|-------------------------------|-----------------------------|------------------------------|----------------------------------------|--------------------------------|-------------------------------------|---------------------------------------|-------------------------------|-------------------------------|-------------------------------|-----------------------------------------|-----------------------------------|---|---|--|--|--|
|                          | Leinicke et al. (2013) <sup>25</sup> | Slobogean et al. (2013) <sup>23</sup> | Tanaka (2001) <sup>26</sup> | Granzetny (2005) <sup>27</sup> | Marasco (2013) <sup>28</sup> | Paris (1975) <sup>29</sup> | Kim (1981) <sup>30</sup> | Karev (1997) <sup>31</sup> | Ahmed et al. (1995) <sup>32</sup> | Voggenreiter (1998) <sup>33</sup> | Balci et al. (2004) <sup>34</sup> | Teng (2009) <sup>35</sup> | Nirula et al (2006) <sup>36</sup> | Althausen et al. (2011) <sup>37</sup> | De Moya (2011) <sup>5</sup> | Granhed et al. (2014) <sup>38</sup> | Doben et al. (2014) <sup>39</sup> | Jayle et al. (2015) <sup>40</sup> | Pieracci et al. (2016) <sup>41</sup> | Zhang et al. (2015) <sup>42</sup> | Wada et al. (2015) <sup>43</sup> | Xu et al. (2015) <sup>44</sup> | Majercik (2015) <sup>45</sup> | Defreest (2016) <sup>46</sup> | Ohresser (1972) <sup>47</sup> | Heilberg (1981) <sup>48</sup> | Menard (1983) <sup>49</sup> | Moulton (1997) <sup>50</sup> | Cacchione et al., (2000) <sup>51</sup> | Lardinois (2001) <sup>52</sup> | Kerr -Valentic (2003) <sup>53</sup> | Gasparri et al., (2003) <sup>54</sup> | Borrelly (2005) <sup>55</sup> | Campbell (2009) <sup>56</sup> | Mayberry (2009) <sup>57</sup> | Richardson et al., (2007) <sup>58</sup> | Moreno De La (2010) <sup>59</sup> |   |   |  |  |  |
| Intervention patients    |                                      |                                       | 18                          | 20                             | 23                           | 18                         | 18                       | 40                         | 26                                | 20                                | 27                                | 32                        | 30                                | 22                                    | 16                          | 60                                  | 10                                | 10                                | 35                                   | 24                                | 84                               | 17                             | 38                            | 41                            | 14                            | 10                            | 18                          | 23                           | 1                                      | 66                             | 40                                  | 1                                     | 127                           | 32                            | 46                            | 7                                       | 22                                |   |   |  |  |  |
| Control Patients         |                                      |                                       | 19                          | 20                             | 23                           | 11                         | 45                       | 93                         | 38                                | 22                                | 37                                | 28                        | 30                                | 28                                    | 32                          | 153                                 | 11                                | 10                                | 35                                   | 15                                | 420                              | 15                             | 57                            | 45                            | -                             | -                             | -                           | -                            | -                                      | -                              | -                                   | -                                     | -                             | -                             | -                             | -                                       | -                                 | - | - |  |  |  |
| Swart <sup>17</sup>      |                                      |                                       | ●                           | ●                              | ●                            |                            | ●                        | ●                          | ●                                 | ●                                 | ●                                 | ●                         | ●                                 | ●                                     | ●                           | ●                                   | ●                                 | ●                                 | ●                                    | ●                                 | ●                                | ●                              | ●                             | ●                             |                               |                               |                             |                              |                                        |                                |                                     |                                       |                               |                               |                               |                                         |                                   |   |   |  |  |  |
| Schuurmans <sup>18</sup> |                                      |                                       | ●                           | ●                              | ●                            |                            |                          |                            |                                   |                                   |                                   |                           |                                   |                                       |                             |                                     |                                   |                                   |                                      |                                   |                                  |                                |                               |                               |                               |                               |                             |                              |                                        |                                |                                     |                                       |                               |                               |                               |                                         |                                   |   |   |  |  |  |
| Schulte <sup>13</sup>    | ●                                    |                                       |                             |                                |                              |                            |                          |                            |                                   |                                   |                                   |                           |                                   | ●                                     | ●                           | ●                                   | ●                                 | ●                                 | ●                                    | ●                                 | ●                                | ●                              |                               |                               |                               |                               |                             |                              |                                        |                                |                                     |                                       |                               |                               |                               |                                         |                                   |   |   |  |  |  |
| Coughlin <sup>19</sup>   |                                      |                                       | ●                           | ●                              | ●                            |                            |                          |                            |                                   |                                   |                                   |                           |                                   |                                       |                             |                                     |                                   |                                   |                                      |                                   |                                  |                                |                               |                               |                               |                               |                             |                              |                                        |                                |                                     |                                       |                               |                               |                               |                                         |                                   |   |   |  |  |  |
| Unsworth <sup>20</sup>   |                                      |                                       | ●                           | ●                              | ●                            |                            |                          | ●                          | ●                                 |                                   |                                   |                           | ●                                 | ●                                     | ●                           |                                     | ●                                 |                                   |                                      |                                   |                                  |                                |                               |                               |                               |                               |                             |                              |                                        |                                |                                     |                                       |                               |                               |                               |                                         |                                   |   |   |  |  |  |
| de Lesquen <sup>15</sup> | ●                                    | ●                                     | ●                           | ●                              | ●                            |                            |                          | ●                          | ●                                 | ●                                 | ●                                 |                           | ●                                 | ●                                     |                             |                                     |                                   |                                   |                                      |                                   |                                  |                                |                               |                               |                               |                               |                             |                              |                                        |                                |                                     |                                       |                               |                               |                               |                                         |                                   |   |   |  |  |  |
| Cataneo <sup>21</sup>    |                                      |                                       |                             |                                |                              |                            |                          |                            |                                   |                                   |                                   |                           |                                   |                                       |                             |                                     |                                   |                                   |                                      |                                   |                                  |                                |                               |                               |                               |                               |                             |                              |                                        |                                |                                     |                                       |                               |                               |                               |                                         |                                   |   |   |  |  |  |
| de Jong <sup>22</sup>    |                                      |                                       |                             |                                |                              |                            |                          |                            |                                   |                                   |                                   |                           | ●                                 |                                       |                             |                                     |                                   |                                   |                                      |                                   |                                  |                                |                               |                               |                               |                               |                             |                              |                                        |                                |                                     |                                       |                               |                               |                               |                                         |                                   | ● | ● |  |  |  |
| Slobogean <sup>23</sup>  |                                      |                                       | ●                           | ●                              |                              |                            | ●                        | ●                          | ●                                 | ●                                 | ●                                 | ●                         | ●                                 |                                       |                             |                                     |                                   |                                   |                                      |                                   |                                  |                                |                               |                               |                               | ●                             |                             |                              |                                        |                                |                                     |                                       |                               |                               |                               | ●                                       |                                   |   |   |  |  |  |
| Leinicke <sup>24</sup>   |                                      |                                       | ●                           | ●                              |                              |                            |                          | ●                          |                                   | ●                                 | ●                                 |                           | ●                                 | ●                                     | ●                           |                                     |                                   |                                   |                                      |                                   |                                  |                                |                               |                               |                               |                               |                             |                              |                                        |                                |                                     |                                       |                               |                               |                               |                                         |                                   |   |   |  |  |  |
| Girsowicz <sup>14</sup>  |                                      |                                       |                             |                                |                              |                            |                          |                            |                                   |                                   |                                   |                           | ●                                 |                                       |                             |                                     |                                   |                                   |                                      |                                   |                                  |                                |                               |                               |                               |                               |                             | ●                            |                                        |                                | ●                                   | ●                                     |                               |                               |                               | ●                                       | ●                                 | ● | ● |  |  |  |
| NICE <sup>12</sup>       |                                      |                                       | ●                           |                                |                              | ●                          |                          |                            |                                   | ●                                 |                                   |                           |                                   |                                       |                             |                                     |                                   |                                   |                                      |                                   |                                  |                                |                               |                               |                               |                               | ●                           | ●                            | ●                                      |                                | ●                                   |                                       |                               |                               |                               |                                         |                                   |   |   |  |  |  |
|                          | SR                                   | RCT                                   | Non Randomised Study        |                                |                              |                            |                          |                            |                                   |                                   |                                   |                           |                                   |                                       |                             |                                     |                                   | Case Series or Report             |                                      |                                   |                                  |                                |                               |                               |                               |                               |                             |                              |                                        |                                |                                     |                                       |                               |                               |                               |                                         |                                   |   |   |  |  |  |

The rapid evidence synthesis by NICE<sup>12</sup> was the first review published in 2010, consisting of seven primary studies including one RCT published in 2001.<sup>26</sup> . Cataneo et al.<sup>21</sup> was the first meta-analysis published (in 2015) and included three RCTs.<sup>26-28</sup> Two further systematic reviews published since then<sup>18 19</sup> identified the same three RCTs and repeated the same meta-analyses for the same review question.

### Risk of bias

Seven reviews rated as low risk of bias<sup>12 15 18 19 21 23 24</sup>, three as unclear<sup>14 17 22</sup> and two as high.<sup>13 20</sup> (Table 3)The high risk of bias rating was due to lack of detail in the search strategy, no attempts to minimise errors of data extraction and no quality assessment of included studies.

The only review for which a protocol was identified was the Cochrane review undertaken by Cataneo et al.<sup>21</sup>

**Table 3 Risk of bias using ROBIS tool**

| Studies                           | Study eligibility criteria | Identification and selection of studies | Data collection and study appraisal | Synthesis and findings | Risk of bias in the review |
|-----------------------------------|----------------------------|-----------------------------------------|-------------------------------------|------------------------|----------------------------|
| Swart 2016 <sup>17</sup>          | Low                        | Unclear                                 | High                                | High                   | Unclear                    |
| Schuurmans 2016 <sup>18</sup>     | Low                        | Unclear                                 | High                                | Low                    | Low                        |
| Schulte, 2016 <sup>13</sup>       | High                       | High                                    | High                                | High                   | High                       |
| Coughlin 2016 <sup>19</sup>       | Low                        | Low                                     | Low                                 | Low                    | Low                        |
| Unsworth 2015 <sup>20</sup>       | Low                        | Low                                     | Unclear                             | Unclear                | High                       |
| de Lesquen, 2015 <sup>15</sup>    | Unclear                    | High                                    | Unclear                             | Unclear                | Low                        |
| Cataneo, 2015 <sup>21</sup>       | Low                        | Low                                     | Low                                 | Low                    | Low                        |
| de Jong, 2014 <sup>22</sup>       | High                       | Unclear                                 | High                                | High                   | Unclear                    |
| Slobogean, 2013 <sup>23</sup>     | Low                        | Low                                     | High                                | Low                    | Low                        |
| Leinicke, 2013 <sup>24</sup>      | Low                        | Low                                     | Low                                 | Low                    | Low                        |
| Girsowicz, 2012 <sup>14</sup>     | High                       | High                                    | High                                | High                   | Unclear                    |
| NICE Evidence, 2010 <sup>12</sup> | Low                        | Unclear                                 | Unclear                             | Low                    | Low                        |

### Outcome evaluation

All reviews undertook a narrative synthesis with six also including a meta-analysis.<sup>17-19 21 23</sup>

<sup>24</sup> Table 4 summarises the meta-analyses for flail chest; Table 5 summarises the narrative syntheses for flail chest; and Table 6 the narrative syntheses for multiple rib fractures.



1 Across all the reviews eighteen outcomes were reported and eleven outcomes were  
2 reported by more than one review.  
3

### 4 **Primary outcome - Length of mechanical ventilation (days)**

#### 5 **Flail Chest**

6 Ten systematic reviews reported length of mechanical ventilation; six undertook a meta-  
7 analysis<sup>17-19 21 23 24</sup> four<sup>17-19 21</sup> of which included the same three RCTs.<sup>26-28</sup>  
8

9 There was substantial variation across the reviews in the pooled estimates for this  
10 outcome, related to pooling different sets of studies. The largest reduction in duration of  
11 mechanical ventilation when surgery is compared to no surgery was reported by  
12 Slobogean et al.<sup>23</sup> pooling two RCTs<sup>26 27</sup> and six non-randomised studies<sup>30 31 33-36</sup> (Mean  
13 difference (MD) -7.5 days, 95% CI [-9.9,-5.5]); (Table 4). The MD was 3 days greater than  
14 the pooled estimates from Leinicke et al.<sup>24</sup> (-4.52 days, 95% CI [-5.54, -3.50]) and Swart et  
15 al.<sup>17</sup>(-4.57 days, SD [0.59]).  
16  
17  
18  
19  
20  
21  
22  
23  
24  
25  
26  
27  
28  
29  
30  
31  
32  
33  
34  
35  
36  
37  
38  
39  
40  
41  
42  
43  
44  
45  
46  
47  
48  
49  
50  
51  
52  
53  
54  
55  
56  
57  
58  
59  
60

Table 4 Results of individual reviews that report a meta-analysis for flail chest

| Total length of invasive mechanical ventilation (Days) |                                              |             |    |                          |                         |                |
|--------------------------------------------------------|----------------------------------------------|-------------|----|--------------------------|-------------------------|----------------|
| Studies reporting outcome                              | N of studies (n of participants in analysis) | Study Types |    | Details of meta-analysis | Results                 | I <sup>2</sup> |
|                                                        |                                              | RCT         | NR |                          |                         |                |
| Cataneo <sup>21</sup>                                  | 3 (123)                                      | 3           | 0  | MD [IV, Fixed, 95% CI]   | Results not pooled      | -              |
| Coughlin <sup>19</sup>                                 | 3 (123)                                      | 3           | 0  | MD [IV, Random, 95% CI]  | -6.30 [-12.16, -0.43]   | 95             |
| Leinicke <sup>24</sup>                                 | 8 (474)                                      | 2           | 6  | MD [IV, Random 95% CI]   | -4.52 [-5.54, -3.50]    | 48.6           |
| Schuurmans <sup>18</sup>                               | 3 (123)                                      | 3           | 0  | MD [IV, Random, 95% CI]  | -6.53 [-11.88, -1.18]   | 93             |
| Slobogean <sup>23</sup>                                | 8 Studies (563)                              | 2           | 6  | MD [IV, Fixed, 95% CI]   | -7.5 [-9.9, -5.0]       | 48             |
| Swart <sup>17</sup>                                    | 18 Studies (1150)                            | 3           | 15 | MD [IV, Random, SD]      | -4.57 [0.59]            | 83             |
| Mortality (frequency)                                  |                                              |             |    |                          |                         |                |
| Cataneo <sup>21</sup>                                  | 3 (123)                                      | 3           | 0  | RR [M-H, Fixed, 95% CI]  | 0.56 [0.13, 2.42]       | 0              |
| Coughlin <sup>19</sup>                                 | 2 (86)                                       | 2           | 0  | RR [M-H Random 95% CI]   | 0.57 [0.13, 2.52]       | 0              |
| Leinicke <sup>24</sup>                                 | 5 (343)                                      | 1           | 0  | RR [95% CI]              | 0.43 [0.28, 0.69]       | 0              |
| Schuurmans <sup>18</sup>                               | 2 (86)                                       | 2           | 0  | RR [M-H, Fixed, 95% CI]  | 0.56 [0.13, 2.42]       | 0              |
| Slobogean <sup>23</sup>                                | 7 (582)                                      | 2           | 5  | OR [M-H, Fixed, 95% CI]  | 0.31 [0.20, 0.48]       | -              |
| Slobogean <sup>23</sup>                                | 7 (582)                                      | 2           | 5  | RR [M-H, Fixed, 95% CI]  | 0.19 [0.13, 0.26]       | 0              |
| Swart <sup>17</sup>                                    | 13(1263)                                     | 3           | 10 | RR [M-H, Random, SD]     | 0.44 [0.09]             | 0              |
| Total length of stay in intensive care unit (Days)     |                                              |             |    |                          |                         |                |
| Cataneo <sup>21</sup>                                  | 2 (77)                                       | 2           | 0  | MD [IV, Fixed, 95% CI]   | Results not pooled      | -              |
| Coughlin <sup>19</sup>                                 | 3 (123)                                      | 3           | 0  | MD [IV, Random, 95% CI]  | -6.46 [-9.73, -3.19]    | 35             |
| Leinicke <sup>24</sup>                                 | 5 (235)                                      | 2           | 3  | MD [IV, Random, 95% CI]  | -3.4 [-6.01, -0.80]     | 74.9           |
| Schuurmans <sup>18</sup>                               | 3 (123)                                      | 3           | 0  | MD [IV, Fixed, 95% CI]   | -5.18 [-6.17, -4.19]    | 40             |
| Slobogean <sup>23</sup>                                | 4 (261)                                      | 2           | 2  | MD [IV, Fixed, 95% CI]   | -4.8 [-7.9, -1.6]       | 0.1            |
| Swart <sup>17</sup>                                    | 14 (840)                                     | 3           | 11 | MD [IV, Random, SD]      | -3.25 [1.29]            | 91             |
| Total length of stay in hospital (Days)                |                                              |             |    |                          |                         |                |
| Coughlin <sup>19</sup>                                 | 2 (86)                                       | 2           | 0  | MD [IV, Random, 95% CI]  | -11.39 [-12.39, -10.38] | 0              |
| Leinicke <sup>24</sup>                                 | 5 (262)                                      | 1           | 4  | MD [IV, Random 95% CI]   | -3.83 [-7.12, -0.54]    | 68.9           |
| Schuurmans <sup>18</sup>                               | 2 (86)                                       | 2           | 0  | MD [IV, Fixed, 95% CI]   | -11.39 [-12.39, -10.38] | 0              |
| Slobogean <sup>23</sup>                                | 4 (404)                                      | 1           | 3  | MD [IV, Fixed, 95% CI]   | -4.0 [-7.4, -0.7]       | 33             |
| Swart <sup>17</sup>                                    | 11(438)                                      | 1           | 10 | MD [IV, Random, SD]      | -4.48 [1.98]            | 89             |

| <b>Pneumonia (frequency)</b>                 |           |   |    |                                 |                               |              |
|----------------------------------------------|-----------|---|----|---------------------------------|-------------------------------|--------------|
| Cataneo <sup>21</sup>                        | 3 (123)   | 3 | 0  | RR [M-H Random 95% CI]          | 0.36 [0.15, 0.85]             | 66           |
| Coughlin <sup>19</sup>                       | 3 (123)   | 3 | 0  | RR [M-H Random 95% CI]          | 0.36 [0.15, 0.85]             | 66           |
| Leinicke <sup>24</sup>                       | 4 (260)   | 1 | 3  | RR [95% CI]                     | 0.43 [0.28, 0.69]             | 31           |
| Schuurmans <sup>18</sup>                     | 2 (83)    | 2 | 0  | RR [M-H, Fixed, 95% CI]         | 0.45 [0.29, 0.7]              | 74           |
| Slobogean <sup>23</sup>                      | 8 (816)   | 2 | 6  | OR [M-H, Fixed, 95% CI]         | 0.18 [0.11, 0.32]             | 4            |
| Slobogean <sup>23</sup>                      | 8 (816)   | 2 | 6  | RR [M-H, Fixed, 95% CI]         | 0.31 [0.21, 0.41]             | 4            |
| Swart <sup>17</sup>                          | 15 (1005) | 3 | 12 | RR [M-H, Random, SD]            | 0.59 [0.10]                   | 55           |
| <b>Tracheostomy (frequency)</b>              |           |   |    |                                 |                               |              |
| Cataneo <sup>21</sup>                        | 2 (83)    | 2 | 0  | RR [M-H Random 95% CI]          | 0.38 [0.14, 1.02]             | 64           |
| Leinicke <sup>24</sup>                       | 4 (215)   | 1 | 3  | RR [95% CI]                     | 0.25 [0.13, 0.47]             | 0            |
| Schuurmans <sup>18</sup>                     | 2 (83)    | 2 | 0  | RR [M-H, Fixed, 95% CI]         | 0.4 [0.2, 0.7]                | Not reported |
| Slobogean <sup>23</sup>                      | 3 (165)   | 1 | 2  | OR [M-H, Fixed, 95% CI]         | 0.12 [0.04, 0.32]             | 0            |
| Slobogean <sup>23</sup>                      | 3 (165)   | 1 | 2  | RR [M-H, Fixed, 95% CI]         | 0.34 [0.10, 0.57]             | 0            |
| Swart <sup>17</sup>                          | 11 (975)  | 2 | 9  | RR [M-H, Random, SD]            | 0.52 [0.07]                   | 42           |
| <b>Sepsis (frequency)</b>                    |           |   |    |                                 |                               |              |
| Slobogean <sup>23</sup>                      | 4 (345)   | 0 | 4  | OR [M-H, Fixed, 95% CI]         | 0.36 [0.19, 0.71]             | 0            |
| Slobogean <sup>23</sup>                      | 4 (345)   | 0 | 4  | RR [M-H, Fixed, 95% CI]         | 0.14 [0.56, 0.23]             | 0            |
| <b>Spirometry (percentage of predicated)</b> |           |   |    |                                 |                               |              |
| Coughlin <sup>19</sup>                       | -         | - | -  | -                               | -                             | -            |
| FVC                                          | 2 (74)    | 2 | 0  | MD [IV, Random, 95% CI] p-value | 1.53 [-13.49, 16.55] p = 0.84 | Not reported |
| FEV1                                         | 2 (74)    | 2 | 0  | MD [IV, Random, 95% CI] p-value | -0.42 [-4.83, 3.98] p = 0.85  | Not reported |
| TLC                                          | 2 (74)    | 2 | 0  | MD [IV, Random, 95% CI] p-value | 3.69 [-3.08, 10.46] p = 0.29  | Not reported |
| PEFR                                         | 2 (74)    | 2 | 0  | MD [IV, Random, 95% CI] p-value | 0.38 [-0.76, 1.53] p = 0.51   | Not reported |
| <b>Chest deformity (frequency)</b>           |           |   |    |                                 |                               |              |
| Cataneo <sup>21</sup>                        | 2 (86)    | 2 | 0  | RR [M-H, Fixed, 95% CI]         | 0.13 [0.03, 0.67]             | 0            |
| Slobogean <sup>23</sup>                      | 4 (228)   | 1 | 3  | OR [M-H, Fixed, 95% CI]         | 0.11 [0.02, 0.60]             | 2.1          |
| Slobogean <sup>23</sup>                      | 4 (228)   | 1 | 3  | RR [M-H, Fixed, 95% CI]         | 0.30 [0.00, 0.60]             | 2.1          |
| <b>Dyspnoea (frequency)</b>                  |           |   |    |                                 |                               |              |
| Slobogean <sup>23</sup>                      | 3 (135)   | 1 | 2  | OR [M-H, Fixed, 95% CI]         | 0.40 [0.16, 1.01]             | 0            |

|                                                                                                                                                                                                                                                                                                                                               |         |   |   |                         |                    |   |
|-----------------------------------------------------------------------------------------------------------------------------------------------------------------------------------------------------------------------------------------------------------------------------------------------------------------------------------------------|---------|---|---|-------------------------|--------------------|---|
| Slobogean <sup>23</sup>                                                                                                                                                                                                                                                                                                                       | 3 (135) | 1 | 2 | RR [M-H, Fixed, 95% CI] | 0.15 [0.09, 0.39]  | 0 |
| <b>Chest pain (frequency)</b>                                                                                                                                                                                                                                                                                                                 |         |   |   |                         |                    |   |
| Slobogean <sup>23</sup>                                                                                                                                                                                                                                                                                                                       | 2(71)   | 1 | 1 | OR [M-H, Fixed, 95% CI] | 0.40 [0.01, 12.60] | 0 |
| Slobogean <sup>23</sup>                                                                                                                                                                                                                                                                                                                       | 2(71)   | 1 | 1 | RR [M-H, Fixed, 95% CI] | 0.18 [0.46, 0.83]  | 0 |
| RCT= Randomised controlled trial, NR = Non randomised study, RR = Risk ratio, OR = Odds ratio, MD = Mean difference, SD = Standard deviation, CI = Confidence interval, IV - Inverse variance, M-H - Mantel-Haenszel, FVC = Force vital capacity, FEV1 = Forced expiratory volume, TLC = Total lung capacity, PEF = Peak expiratory flow rate |         |   |   |                         |                    |   |

1  
2  
3 There were differences in the data reported across the four meta-analyses<sup>17-19 21</sup> that  
4 included the same three RCTs. Schuurmans et al.<sup>18</sup> extracted median duration from the  
5 Marasco et al. RCT,<sup>28</sup> producing an estimate MD -6.53 days, 95% CI [-11.88, -1.18]) In  
6  
7 contrast, Coughlin et al.<sup>19</sup>, Cataneo et al.<sup>21</sup> and Swart et al.<sup>17</sup> report the total mean time on  
8 mechanical ventilation, which they state, was obtained directly from the authors producing  
9 an estimate MD -6.30 days, 95% CI [-12.16, -0.43]).  
10  
11  
12  
13  
14  
15

16 Variations also arose in relation to the extraction of data from the RCT by Granetzny et al.<sup>27</sup>  
17 who did not report standard deviations (SDs) for mechanical ventilation. Slightly different SD  
18 values are found in all six meta-analyses<sup>17-19 21 23 24</sup> which may have arisen from different  
19 methods of imputation and all give slightly different estimates.  
20  
21  
22  
23  
24  
25

26 Substantial heterogeneity was seen in all meta-analyses reporting this outcome<sup>18 19 23 24</sup> ( $I^2 =$   
27 48% to 95%). Only one study<sup>21</sup> did not pool due to heterogeneity.  
28  
29  
30

31 Narrative synthesis from two reviews concluded that surgery reduces the length of  
32 mechanical ventilation compared to no surgery.<sup>15 20</sup> (Table 5)  
33  
34  
35  
36  
37  
38  
39  
40  
41  
42  
43  
44  
45  
46  
47  
48  
49  
50  
51  
52  
53  
54  
55  
56  
57  
58  
59  
60

Table 5 Results of individual reviews that report a narrative synthesis for flail chest

| Study details                                                                                 | Included studies                                                                                                                                                                                                                                                                                               | Outcomes assessed                                                                                                                                                                                                                  | Narrative Synthesis                                                                                                                                                                                                                                                                                                                                                                                                                                                                                                                                                                                                                                                                                                                                                                                                                                                                                                                                                                                     |
|-----------------------------------------------------------------------------------------------|----------------------------------------------------------------------------------------------------------------------------------------------------------------------------------------------------------------------------------------------------------------------------------------------------------------|------------------------------------------------------------------------------------------------------------------------------------------------------------------------------------------------------------------------------------|---------------------------------------------------------------------------------------------------------------------------------------------------------------------------------------------------------------------------------------------------------------------------------------------------------------------------------------------------------------------------------------------------------------------------------------------------------------------------------------------------------------------------------------------------------------------------------------------------------------------------------------------------------------------------------------------------------------------------------------------------------------------------------------------------------------------------------------------------------------------------------------------------------------------------------------------------------------------------------------------------------|
| <b>Author</b><br>Unsworth <sup>20</sup><br><b>Year</b><br>2015<br><b>Country</b><br>Australia | RCT = 2<br>Granetzny (40)<br>Tanaka (37)<br>Marasco (46)<br>Non randomised= 6<br>Ahmed (64)<br>Althausen (50)<br>Doben (21)<br>De Moya (48)<br>Nirula (60)<br>Voggenreiter (42)<br>Total number of patients = 408                                                                                              | <ul style="list-style-type: none"> <li>• Mortality</li> <li>• Pneumonia</li> <li>• Pneumothorax and haemothorax</li> <li>• Hospital length of stay</li> <li>• ICU stay</li> <li>• Costings</li> <li>• Treatment outcome</li> </ul> | <ul style="list-style-type: none"> <li>• Significant decrease in mechanical ventilation requirements after surgical fixation. decreasing in ventilator-acquired pneumonia after surgical fixation</li> <li>• decrease in ICU-LOS, fewer days of mechanical ventilation and cost savings compared to non-operative management</li> <li>• decreased days of ventilator dependence, and shorter ICU-LOS</li> <li>• lower incidence of pneumonia, a higher return to full time work at six months</li> <li>• less persistent pain at six and 12 months in those receiving surgery</li> <li>• significantly fewer days of mechanical ventilation and a shorter hospital and ICU-LOS</li> <li>• The estimated cost savings ranged from US Dollars 10,000 to AU Dollars 14,443 per patient with surgical rib fixation as a result of the decrease in ICU-LOS.</li> <li>• None of the studies were large enough to draw conclusions on the effect of this intervention on thromboembolism and death.</li> </ul> |
| <b>Author</b><br>de Lesquen <sup>15</sup><br><b>Year</b><br>2015<br><b>Country</b><br>France  | Meta-analysis = 2<br>Leinicke 9 studies (538 patients)<br>Slobogean 11 studies (732 patients)<br>RCT = 3<br>Marasco (46)<br>Granetzny (40)<br>Tanaka (37)<br>Non-randomised= 6<br>Ahmed (64)<br>Karev (40)<br>Voggenreiter (20)<br>Balci (64)<br>Nirula (60)<br>Althausen (50)<br>Total number of patients=421 | <ul style="list-style-type: none"> <li>• Duration of IMV</li> <li>• LOS ICU</li> <li>• Pneumonia</li> <li>• Mortality</li> </ul>                                                                                                   | For flail chest, early surgical stabilization can be considered in patients who would require mechanical ventilation for >48 h (Grade B, extrapolated recommendations from Level I evidences).                                                                                                                                                                                                                                                                                                                                                                                                                                                                                                                                                                                                                                                                                                                                                                                                          |

1  
2  
3  
4  
5  
6  
7  
8  
9  
10  
11  
12  
13  
14  
15  
16  
17  
18  
19  
20  
21  
22  
23  
24  
25  
26  
27  
28  
29  
30  
31  
32  
33  
34  
35  
36  
37  
38  
39  
40  
41  
42  
43  
44  
45  
46

|                                                                                                                                  |                                                                                                                                                                                                                                                                                                                                                                                   |                                                                                                                                                                                                                                                                       |                                                                                                                                                                                                                                                                                                                                                                              |
|----------------------------------------------------------------------------------------------------------------------------------|-----------------------------------------------------------------------------------------------------------------------------------------------------------------------------------------------------------------------------------------------------------------------------------------------------------------------------------------------------------------------------------|-----------------------------------------------------------------------------------------------------------------------------------------------------------------------------------------------------------------------------------------------------------------------|------------------------------------------------------------------------------------------------------------------------------------------------------------------------------------------------------------------------------------------------------------------------------------------------------------------------------------------------------------------------------|
| <p><b>Author</b><br/>NICE <sup>12</sup><br/><b>Year</b><br/>2010<br/><b>Country</b><br/>UK</p>                                   | <p>RCT = 1<br/>Tanaka (37)<br/>Non-randomised = 2<br/>Voggenreiter (42)<br/>Paris (29)<br/>Case Series = 4<br/>Lardinois (66)<br/>Mouton (23)<br/>Menard (18)<br/>Hellberg (10)<br/>Total number of patients=225<br/>Intervention group = 173<br/>Control group = 52</p>                                                                                                          | <ul style="list-style-type: none"> <li>• Duration of IMV</li> <li>• Mortality</li> <li>• LOS ICU</li> <li>• Pneumonia</li> <li>• Lung function</li> <li>• Return to Employment</li> <li>• Sepsis</li> <li>• Pain or discomfort requiring removal of plates</li> </ul> | <p>Surgical stabilisation with metal rib reinforcements aims to allow earlier weaning from mechanical ventilation, reduce acute complications and avoid chronic pain sometimes associated with permanent malformation of the chest wall. Kirschner wire may be used on its own, but this method of rib stabilisation is not covered by this guidance.</p>                    |
| <p><b>Author</b><br/>Schulte <sup>13</sup><br/><b>Year</b><br/>2016<br/><b>Country</b><br/>UK</p>                                | <p>Systematic Review = 1<br/>Slobogean (753)<br/>RCT = 1<br/>Marasco (23,23)<br/>Non-randomised studies = 9<br/>Jayle (10,10)<br/>Pieracci (35,35)<br/>Zhang (24,15)<br/>Wada (84,336)<br/>Granhed (60,153)<br/>Doben (10,11)<br/>Xu (17,15)<br/>Althausen (22,28)<br/>De Moya (16,32)<br/>Total number of patients=1712<br/>Intervention group = 301<br/>Control group = 658</p> | <ul style="list-style-type: none"> <li>• Duration of IMV</li> <li>• Mortality</li> <li>• LOS hospital</li> <li>• LOS ICU</li> <li>• Pneumonia</li> </ul>                                                                                                              | <p>Surgical stabilization of flail chest in thoracic trauma patients has beneficial effects with respect to reduced ventilatory support, shorter intensive care and hospital stay, reduced incidence of pneumonia and septicaemia, decreased risk of chest deformity and an overall reduced mortality when compared with patients who received non-operative management.</p> |
| <p>ICU = Intensive care unit, IMV = invasive mechanical ventilation, LOS = Length of stay, RCT = Randomised controlled trial</p> |                                                                                                                                                                                                                                                                                                                                                                                   |                                                                                                                                                                                                                                                                       |                                                                                                                                                                                                                                                                                                                                                                              |

### Multiple rib fractures

Two reviews<sup>14 22</sup> included one primary study<sup>36</sup> that had matched non-operative controls<sup>36</sup> (non-operative treatment not described) and reported a statistically significant reduction in post-operative ventilator days ( $p = 0.02$ ) in favour of the fixation group (Table 6) but no statistically significant difference in total ventilator days ( $p = 0.12$ ).

For peer review only



Table 6 Results of individual reviews that report a narrative synthesis for multiple rib fractures

| Study details                                                                                  | Included studies                                                                                                                                                                                                                                                                                                                           | Outcomes assessed                                                                                                                                       | Narrative Synthesis                                                                                                                                                                                                                                                                                                                                                                                                                                                                                                                                                                                                                                                                                                                                                                                                |
|------------------------------------------------------------------------------------------------|--------------------------------------------------------------------------------------------------------------------------------------------------------------------------------------------------------------------------------------------------------------------------------------------------------------------------------------------|---------------------------------------------------------------------------------------------------------------------------------------------------------|--------------------------------------------------------------------------------------------------------------------------------------------------------------------------------------------------------------------------------------------------------------------------------------------------------------------------------------------------------------------------------------------------------------------------------------------------------------------------------------------------------------------------------------------------------------------------------------------------------------------------------------------------------------------------------------------------------------------------------------------------------------------------------------------------------------------|
| <b>Author</b><br>de Jong <sup>22</sup><br><b>Year</b><br>2014<br><b>Country</b><br>Netherlands | RCT = 0<br>Non-randomised = 1<br>Nirula (60)<br>Case Series = 2<br>Campbell (32)<br>Mayberry (46, 15 non-flail)<br>Total number of patients=138<br>Intervention group = 108<br>Control group = 30                                                                                                                                          | <ul style="list-style-type: none"> <li>• LOS hospital</li> <li>• Duration of IMV</li> <li>• Time of operation</li> <li>• Chronic pain</li> </ul>        | Only Nirula et al. concluded that rib fracture fixation showed a trend toward fewer total ventilator days. Mayberry et al. investigated the quality of life after rib fixation, and they concluded that there was low long-term morbidity and pain. Campbell et al. demonstrated low levels of pain and satisfactory rehabilitation.                                                                                                                                                                                                                                                                                                                                                                                                                                                                               |
| <b>Author</b><br>Girsowicz <sup>14</sup><br><b>Year</b><br>2012<br><b>Country</b><br>France    | Non-systematic review =1<br>Nirula and Mayberry<br>Case Comparator = 1<br>Nirula (30,30)<br>Case Series = 4<br>Mayberry (46)<br>Richardson (7)<br>Barajas (22)<br>Campbell (32)<br>Case report = 3<br>Gasparri (1)<br>Cacchione (1)<br>Kerr-Valentic (1)<br>Total number of patients=169<br>Intervention group = 139<br>Control group = 30 | <ul style="list-style-type: none"> <li>• Pain</li> <li>• Disability</li> <li>• Respiratory function</li> <li>• Number of days lost from work</li> </ul> | In general, of the nine studies presented, all indicated that surgical stabilization in the management of isolated multiple non-flail and painful rib fractures improved outcomes. Indeed, the interest and benefit was shown not only in terms of pain and respiratory function but also in improved quality of life and reduced socio-professional disability. Hence, the current evidence shows surgical stabilization to be safe and effective in alleviating post-operative pain and improving patient recovery, thus enhancing the outcome of the procedure. However, retrieved studies provided a low level of evidence (small studies with few numbers of patients and short-term follow-up or case reports). Large prospective controlled trials are thus necessary to confirm these encouraging results. |

IMV = invasive mechanical ventilation, RCT = Randomised controlled trial

## Mortality

### Flail Chest

Seven reviews reported mortality; six undertook a meta-analysis<sup>17-19 21 23 24 15</sup>. Three reviews<sup>18 19 21</sup> which pooled the same three RCTs<sup>26-28</sup> showed a non-statistically significant reduction in mortality with surgery compared to no surgery (Risk Ratio (RR) 0.56, 95% CI [0.13, 2.42]<sup>18 21</sup> and RR 0.57, 95% CI [0.13, 2.52]<sup>19</sup> (Table 4)).

Three reviews pooled randomised and non-randomised studies.<sup>17 23 24</sup> Estimates were RR 0.19, 95% CI [0.13, 0.26],<sup>23</sup> (RR 0.43, 95% CI [0.28, 0.69]<sup>24</sup> and RR 0.44, SD [0.09]<sup>17</sup> Overall, statistical heterogeneity was low ( $I^2=0\%$ ) for this outcome in all studies that presented this data.<sup>17-19 21 23 24</sup>

### Multiple rib fractures

Mortality was not assessed by de Jong et al.<sup>22</sup> or Girsowicz et al.<sup>14</sup>

## Length of ICU Stay (days)

### Flail Chest

Eight reviews<sup>12 15 17-19 21 23 24</sup> assessed length of ICU stay; six undertook a meta-analysis.<sup>17-19 21 23 24</sup> Pooled estimates ranged from -3.25 days [SD 1.29]<sup>17</sup> to -6.46 days, 95% CI [-9.73, -3.19]<sup>19</sup> and were all in favour of surgical fixation compared to a variety of comparators (Table 4). The range in pooled estimates may be partly explained by the pooling of different sets of studies. However, differences occurred as some pooled median length of ICU stay and others pooled the mean. Furthermore, some used postoperative time spent in ICU and others the total time spent in ICU.<sup>17-19</sup>

Variation also arose across reviews in the data extracted from a trial that did not report SDs in the primary publication.<sup>27</sup> Values were imputed or the raw data obtained from the authors resulting in SD values ranging from 0.7 to 4.4 and 2.2 to 7.3 in the operative and non-operative groups respectively. There was also a substantial difference in the effect estimate for this trial.<sup>27</sup> In one review<sup>24</sup>, the effect estimate of -10 days, 95% CI [-15.41, -4.59], was

1  
2  
3 five days greater than the estimate used from the same trial in other reviews. It is the same  
4 as the as length of mechanical ventilation effect estimate reported in the same study<sup>27</sup> so is  
5 possibly a transcription error.  
6  
7  
8

9  
10 Statistical heterogeneity ranged from substantial to none<sup>60</sup> ( $I^2 = 74.9\%^{24}$ ,  $40\%^{18}$ ,  $35\%^{19}$  and  
11  $0.1\%^{23}$ ). The narrative syntheses concluded that in patients with flail chest undergoing  
12 surgical fixation length of ICU stay was reduced compared to non-operative management.<sup>15</sup>  
13  
14  
15

16  
17  
18  
19  
20

### Multiple rib fractures

21  
22 A single review<sup>14</sup> included one non-randomised study reporting no statistically significant  
23 difference in ICU days ( $p = 0.51$ ), the MD and 95% CI was not reported <sup>36</sup>.  
24  
25

## Length of Hospital Stay (days)

### Flail Chest

26  
27  
28  
29  
30 Nine reviews<sup>12 15 17-21 23 24</sup> reported length of hospital stay, six undertook a meta-analysis.<sup>17-19</sup>  
31

32  
33 <sup>21 23 24</sup> Two reviews<sup>17 21</sup> pooled the same two trials<sup>26 27</sup> and found a significantly shorter  
34 hospital length of stay in favour of surgery compared to non-operative management (MD -  
35 11.39 days 95% CI [-12.39, -10.38]). When non-randomised studies were included in the  
36 meta-analysis the pooled effects were smaller -3.83 days, 95% CI [-7.12,-0.54],<sup>24</sup> -4 days,  
37 95% CI [-7.4, -0.7]<sup>23</sup> and -4.48 days, SD [1.9]<sup>17</sup> in favour of fixation; Table 4).  
38  
39  
40  
41  
42

43  
44 Heterogeneity ranged from low ( $I^2 = 0^{18 19}$ , meta-analyses of RCTs only) to moderate or  
45 substantial, ( $I^2 = 89\%^{17}$ ,  $I^2 = 68.9\%^{24}$  and  $I^2 = 33\%^{23}$ ).  
46  
47

### Multiple rib fractures

48  
49  
50  
51 Two systematic reviews<sup>14 22</sup> (Table 6) included a single non-randomised study<sup>36</sup> reporting no  
52 statistically significant difference in hospital stay with surgery (mean 18.8 days [SD 1.8])  
53 compared to the non-operative management (21.1 days [SD 3.9]), ( $p=0.59$ ).  
54  
55  
56  
57

## Pneumonia

## Flail Chest

Ten reviews<sup>12 15 17-19 21 23 24 61</sup>, reported the risk of developing pneumonia, six undertook a meta-analysis.<sup>13 17-21 23 24</sup> Three RCTs<sup>26-28</sup> were pooled in two of the reviews<sup>15 17</sup> and they found a RR of 0.36, 95% CI [0.15, 0.85], in favour of fixation compared to non-operative management. When non-randomised studies were combined the RR ranged from 0.31, 95% CI [0.21, 0.41]<sup>23</sup> to 0.45, 95% CI [0.29, 0.70]<sup>25</sup> in favour of fixation (Table 4). Substantial heterogeneity was seen in meta-analyses for this outcome<sup>18 19 21</sup> that included the three RCTs<sup>26-28</sup> ( $I^2 = 66\%$  to  $74\%$ ). In the reviews that pooled the RCTs alongside the non-randomised studies<sup>23 24</sup> there were lower levels of heterogeneity ( $I^2 = 4\%$  and  $I^2 = 31\%$ , respectively).

Two narrative syntheses report that among patients with flail chest, risk of pneumonia was reduced in the surgery group compared to the no surgery group (Table 5).<sup>15 20</sup>

## Tracheostomy

### Flail Chest

Five reviews reported a meta-analysis for tracheostomy.<sup>17 18 21 23 24</sup> Pooled RRs ranged from 0.25, 95% CI [0.13, 0.47] to 0.40, 95% CI [0.2, 0.7] (Table 4). Moderate and substantial heterogeneity was seen in two reviews ( $I^2=42\%$ <sup>17</sup>,  $I^2=64\%$ <sup>21</sup>), low in two reviews<sup>23 24</sup> ( $I^2=0\%$ ), and one did not report heterogeneity.<sup>18</sup>

## Sepsis

### Flail Chest

One review<sup>23</sup>, pooling four non-randomised studies<sup>30 32 33 55</sup> estimated a RR of 0.14, 95% CI [0.56, 0.23] with  $I^2=0\%$  in favour of fixation compared to non-operative management for sepsis. The estimate RR reported is not possible given the confidence interval does not include the estimated value, 0.14. The lower interval of 0.56 could possibly be -0.56 creating a wider CI and would suggest that the author's conclusion was correct and there was a statistically significant difference in favour of fixation.

## Spirometry

### Flail Chest

One review<sup>19</sup> reported a meta-analysis of spirometry data which included two RCTs<sup>27 28</sup> with spirometry measured at two different time points (three and two months respectively). No statistically significant differences in any spirometry data were seen between surgery and no surgery (Table 4).

## Chest Deformity

### Flail Chest

Two reviews reported a meta-analysis of chest deformity<sup>23 21</sup>, both reported a statistically significant difference in favour of surgery compared to no surgery (RR 0.30, 95% CI [0.00, 0.60],  $I^2=2.1%$  and RR 0.13, 95% CI [0.03 to 0.67],  $I^2=0%$ ).

## Dyspnoea

### Flail chest

One review<sup>23</sup> pooled an RCT<sup>26</sup> and two non-randomised studies.<sup>32 47</sup> for dyspnoea (risk ratio 0.15, 95% CI [0.09 to 0.39] in favour of fixation). Duration of follow-up was one year for two of the primary studies<sup>47 26</sup> and unclear in the third.<sup>32</sup> It was unclear how dyspnoea was measured or defined in the three primary studies.

## Chest Pain

### Flail chest

Chest pain was reported in one review<sup>23</sup> which pooled one RCT<sup>26</sup> and one non-randomised study<sup>47</sup> suggesting a benefit in favour of fixation (RR 0.18, CI 95% [0.46, 0.83]).

## Other reported outcomes

Several other outcomes were reported within the systematic reviews however no others have been pooled in a meta-analysis. A narrative synthesis was not completed on the outcomes: wound infection, pain-requiring removal of metalwork, return to work, socio-

1  
2  
3 professional disability cost, pulmonary embolism, pneumothorax and haemothorax. In the  
4 reviews, data on these additional outcomes was minimal and presented as a narrative  
5 synthesis without presenting numerical data (Table 5 and Table 6).  
6  
7  
8  
9

## 10 11 **DISCUSSION**

12  
13 Twelve systematic reviews on the effectiveness of surgery for flail chest and multiple rib  
14 fractures published between 2010 and 2016. This is the first systematic review of reviews  
15 and highlighted that there are a large number of reviews with same aims and including the  
16 same primary studies.  
17  
18  
19  
20  
21  
22

### 23 **Flail chest**

24  
25 Six<sup>17-19 21 23 24</sup> of the 12 systematic reviews presented meta-analyses for flail chest based on  
26 overlapping primary studies. They reported reductions in length of mechanical ventilation,  
27 length of stay, pneumonia and tracheostomy rates with surgery compared to non-surgical  
28 management and inconsistent results for mortality. Across many of the meta-analyses there  
29 was moderate to high levels of heterogeneity and variation in the effect estimates.  
30  
31  
32  
33  
34  
35  
36

37 A single systematic review found reductions in sepsis, dyspnoea, chest deformity and chest  
38 pain with surgery compared to no surgery management. Nevertheless, as the outcome  
39 measures were not defined it is difficult to know whether the reductions are clinically  
40 significant. Reporting of adverse outcomes was infrequent across the reviews, which could  
41 reflect lack of measurement and/or reporting of adverse events in the primary studies or the  
42 systematic reviews. Therefore, the benefits of surgery could be overestimated in light of the  
43 potential risks not being considered. Synthesising multiple meta-analyses data that include  
44 overlapping primary studies has the potential to overestimate the strength of the findings  
45 therefore it is important to be mindful of the limited evidence on which our conclusions are  
46 based. In addition, significant heterogeneity for several of the outcomes that were pooled  
47 makes drawing firm conclusions difficult.  
48  
49  
50  
51  
52  
53  
54  
55  
56  
57  
58  
59  
60

## Multiple rib fractures

Evidence in support of multiple rib fracture fixation in the absence of flail chest is limited.

Two systematic reviews<sup>14 22</sup> reported on one non-randomised study<sup>36</sup> that recruited between 1996 and 2000, four case series<sup>56-59</sup> and two case reports.<sup>51 54</sup> Hence, due to limited evidence no conclusive statements on effectiveness can be drawn.

## Review quality

A significant amount of effort and time is required to conduct a high quality systematic review and should only be undertaken when there is sufficient cause<sup>62 63</sup> (e.g. to incorporate the findings of a new RCT or to address an evidence gap). Eight of the systematic reviews were published within 18 months although none were registered on PROSPERO<sup>64</sup> so it is possible the authors were unaware of each other's research. Registering reviews allows transparency of methods and also reduces research waste.<sup>65</sup> As similar search strategies and search dates were used in each systematic review, inevitably many of the included studies were the same across reviews.

Only two of the 12 systematic reviews formally appraised the quality of the included studies, therefore 10 of the reviews were not in a position to fully consider the impact of risk of bias on their conclusions. High or unclear risk of bias within reviews have affected the conclusions drawn from this evidence synthesis. In a systematic review of 106 emergency surgery systematic reviews, a low risk of bias was found in 53.8%, identifying a common problem of poor quality reviews conducted in emergency surgery.<sup>66</sup>

## Heterogeneity and meta-analysis errors

The  $I^2$  value describes the percentage of total variation across studies that is due to heterogeneity rather than chance.<sup>67</sup> Examining the meta-analyses including RCTs highlights moderate to high levels of statistical heterogeneity.

There was also clinical variation in the primary studies in terms of indications and timing of surgery and it is possible that these between study differences could be a source of the

1  
2  
3 substantial heterogeneity. For example, in one RCT<sup>26</sup> patients were randomised after 5 days  
4 of invasive ventilation, whereas another RCT<sup>27</sup> randomised and fixed within 24 to 72 hours  
5 regardless of initial intubation state. Also, many reviews define the comparator as usual care  
6 or non-operative care but do not elaborate on what encompasses this care. Differences in  
7 how outcomes were measured may also have contributed to between study heterogeneity. It  
8 was unknown due to lack of reporting whether the outcomes were equivalent in the pooled  
9 primary studies or overall between systematic reviews.  
10  
11  
12  
13  
14  
15  
16

17  
18 In all systematic reviews with meta-analyses, they reported that two reviewers were involved  
19 in the data extraction to minimise errors.<sup>17 19 21 23 24</sup> Despite attempts to minimise errors and  
20 therefore an apparent low risk of bias, some errors (up to an MD of 10 days in the  
21 measurement of length of intensive care stay) were identified across reviews. It is worth  
22 noting that there were no significant changes in the conclusions drawn from these analyses.  
23 Although there was substantial statistical and clinical heterogeneity and lack of consideration  
24 of risk of bias in many of the reviews, conclusions tended to be similar and in the direction of  
25 benefit with fixation suggesting that further high quality RCTs investigating the effectiveness  
26 (including adverse effects) of internal surgical fixation over non-operative management are  
27 warranted.  
28  
29  
30  
31  
32  
33  
34  
35  
36  
37  
38  
39

#### 40 Strengths

41 Multiple databases were searched for studies and study selection was undertaken by two  
42 researchers, reducing the risk of error and bias. Although only English language studies  
43 were included, some sources of unpublished studies were searched. A mapping of the  
44 studies included in the reviews was undertaken to take into account individual studies being  
45 included in multiple reviews and hence double counting studies.  
46  
47  
48  
49  
50  
51  
52  
53

#### 54 Limitations

55 All systematic reviews were included irrespective of their risk of bias scoring. It could be  
56 argued that several reviews were stretching the traditional definition of a systematic review  
57  
58  
59  
60



1  
2  
3 however they did hold to the protocol definition with an electronic database search strategy  
4 and included primary evidence. Due to best evidence topics and rapid evidence synthesis  
5 being included it was then difficult to apply the ROBIS tool consistently. The ROBIS tool is  
6 not designed for rapid evidence synthesis and therefore this type of review showed high risk  
7 of bias as they were being assessed against a tool designed for full systematic reviews.  
8  
9 Rapid evidence syntheses, by their nature address a trade-off between time and  
10 methodological rigour and comprehensiveness.<sup>68</sup>  
11  
12  
13  
14  
15  
16  
17  
18  
19

## 20 **CONCLUSION**

21  
22 The considerable duplication of work across reviews could be mitigated through protocol  
23 registration and greater attention to establishing whether a review is necessary by scoping  
24 the literature before commencing a new review. Despite this review identifying 12 systematic  
25 reviews they only included 37 unique primary studies, only three of which were RCTs.  
26  
27 Synthesis of the reviews has shown some potential improvement in patient outcomes with  
28 flail chest after surgical intervention. However, there were differences in indications and  
29 timing of interventions in the primary studies and moderate to high levels of heterogeneity  
30 across reviews. For future review updates, meta-analysis for effectiveness may need to take  
31 into account indications and timing of surgery as a subgroup analysis to address clinical  
32 heterogeneity between primary studies. Further robust evidence is required before  
33 conclusions can be drawn of the effectiveness of surgical fixation for flail chest and in  
34 particular, multiple rib fractures.  
35  
36  
37  
38  
39  
40  
41  
42  
43  
44  
45  
46  
47

## 48 **Acknowledgments and funding statement**

49  
50 This review was completed as part of an MD project which was funded by an educational  
51 grant from Orthopaedic Research UK. The funders had no role in study design, data  
52 collection and analysis, decision to publish, or preparation of the manuscript. The research  
53 was undertaken at the BOA Orthopaedic Surgery Research Centre (BOSRC) at York Trials  
54  
55  
56  
57  
58  
59 Unit  
60

### **Contributor statement**

HI contributed to conceptualisation, methodology, investigation, formal analysis, original draft preparation. EC contributed to investigation, validation, review and editing. WE contributed to conceptualisation, review and editing. AR contributed to funding acquisition, conceptualisation, review and editing. CH contributed to methodology, supervision, conceptualisation, review and editing. CM contributed to methodology, investigation, validation, conceptualisation, supervision, review and editing. All authors approve the final version of the manuscript and are accountable for all aspects of the work.

### **Competing Interests**

AR declares receiving research grants from NIHR; research and educational grants from DePuy Ltd outside the submitted work.

### **Data sharing statement**

All data used for the preparation of this review are reported within the manuscript or its supplementary files.

## REFERENCES

1. Veysi VT, Nikolaou VS, Paliobeis C, et al. Prevalence of chest trauma, associated injuries and mortality: a level I trauma centre experience. *Int Orthop* 2009;33(5):1425-33. doi: 10.1007/s00264-009-0746-9 [published Online First: 2009/03/07]
2. American College of Surgeons. NTDB ANNUAL REPORT 2016. In: Chang MC, ed., 2016.
3. Brasel KJ, Moore EE, Albrecht RA, et al. Western Trauma Association Critical Decisions in Trauma: Management of rib fractures. *Journal of Trauma and Acute Care Surgery* 2017;82(1):200-03. doi: 10.1097/ta.0000000000001301
4. Vyhnanek F, Jirava D, Ocadlik M, et al. Surgical Stabilisation of Flail Chest Injury: Indications, Technique and Results. *Acta Chirurgiae Orthopaedicae Et Traumatologiae Cechoslovaca* 2015;82(4):303-07.
5. De Moya M, Bramos T, Agarwal S, et al. Pain as an indication for rib fixation: A bi-institutional pilot study. *Journal of Trauma - Injury, Infection and Critical Care* 2011;71(6):1750-54. doi: <http://dx.doi.org/10.1097/TA.0b013e31823c85e9>
6. Velasquez M, Ordonez CA, Parra MW, et al. Operative versus Nonoperative Management of Multiple Rib Fractures. *Am Surg* 2016;82(5):E103-E05.
7. Bhatnagar A, Mayberry J, Nirula R. Rib fracture fixation for flail chest: What is the benefit? *J Am Coll Surg* 2012;215(2):201-05. doi: <http://dx.doi.org/10.1016/j.jamcollsurg.2012.02.023>
8. Centre for Reviews and Dissemination. Systematic Reviews - CRD's guidance for undertaking reviews in health care: York Publishing Services 2009.
9. Whiting P, Savović J, Higgins JPT, et al. ROBIS: A new tool to assess risk of bias in systematic reviews was developed. *Journal of Clinical Epidemiology* 2016;69:225-34. doi: 10.1016/j.jclinepi.2015.06.005
10. Page MJ, McKenzie JE, Kirkham J, et al. Bias due to selective inclusion and reporting of outcomes and analyses in systematic reviews of randomised trials of healthcare interventions. *Cochrane Database Syst Rev* 2014(10) doi: 10.1002/14651858.MR000035.pub2
11. Moher D, Liberati A, Tetzlaff J, et al. Preferred reporting items for systematic reviews and meta-analyses: the PRISMA statement. *J Clin Epidemiol* 2009;62 doi: 10.1016/j.jclinepi.2009.06.005
12. National Institute for Clinical Excellence. Insertion of metal rib reinforcements to stabilise a flail chest wall. *Interventional procedures guidance* 2010;[IPG361]
13. Schulte K, Whitaker D, Attia R. In patients with acute flail chest does surgical rib fixation improve outcomes in terms of morbidity and mortality? *Interactive Cardiovascular and Thoracic Surgery* 2016;23(2):314-19. doi: <http://dx.doi.org/10.1093/icvts/ivw092>
14. Girsowicz E, Falcoz PE, Santelmo N, et al. Does surgical stabilization improve outcomes in patients with isolated multiple distracted and painful non-flail rib fractures? *Interactive Cardiovascular and Thoracic Surgery* 2012;14(3):312-15. doi: <http://dx.doi.org/10.1093/icvts/ivr028>
15. de Lesquen H, Avaro JP, Gust L, et al. Surgical management for the first 48 h following blunt chest trauma: state of the art (excluding vascular injuries). *Interactive Cardiovascular and Thoracic Surgery* 2015;20(3):399-408. doi: 10.1093/icvts/ivu397
16. Khan OA, Dunning J, Parvaiz AC, et al. Towards evidence-based medicine in surgical practice: Best BETs. *Int J Surg* 2011;9(8):585-88. doi: <https://doi.org/10.1016/j.ijsu.2011.08.001>
17. Swart E, Laratta J, Slobogean G, et al. Operative Treatment of Rib Fractures in Flail Chest Injuries: A Meta-Analysis and Cost Effectiveness Analysis. *J Orthop Trauma* 2016; Publish Ahead of Print doi: 10.1097/bot.0000000000000750
18. Schuurmans J, Goslings JC, Schepers T. Operative management versus non-operative management of rib fractures in flail chest injuries: a systematic review. *European Journal of Trauma and Emergency Surgery* 2016:1-6. doi: 10.1007/s00068-016-0721-2

19. Coughlin TA, Ng JWG, Rollins KE, et al. Management of rib fractures in traumatic flail chest A meta-analysis of randomised control trials. *Bone & Joint Journal* 2016;98B(8):1119-25. doi: 10.1302/0301-620x.98b8.37282
20. Unsworth A, Curtis K, Asha SE. Treatments for blunt chest trauma and their impact on patient outcomes and health service delivery. *Scandinavian Journal of Trauma Resuscitation & Emergency Medicine* 2015;23 doi: 10.1186/s13049-015-0091-5
21. Cataneo AJ, Cataneo DC, de Oliveira FH, et al. Surgical versus nonsurgical interventions for flail chest. *The Cochrane database of systematic reviews* 2015;7:CD009919. doi: <http://dx.doi.org/10.1002/14651858.CD009919.pub2>
22. de Jong MB, Kokke MC, Hietbrink F, et al. Surgical Management of Rib Fractures: Strategies and Literature Review. *Scandinavian Journal of Surgery* 2014;103(2):120-25. doi: 10.1177/1457496914531928
23. Slobogean GP, MacPherson CA, Sun T, et al. Surgical fixation vs nonoperative management of flail chest: A meta-analysis. *Journal of the American College of Surgeons* 2013;216(2):302-11.e1. doi: <http://dx.doi.org/10.1016/j.jamcollsurg.2012.10.010>
24. Leinicke JA, Elmore L, Freeman BD, et al. Operative management of Rib fractures in the setting of flail chest: A systematic review and meta-analysis. *Annals of Surgery* 2013;258(6):914-21. doi: <http://dx.doi.org/10.1097/SLA.0b013e3182895bb0>
25. Leinicke JA, Elmore L, Freeman BD, et al. Operative Management of Rib Fractures in the Setting of Flail Chest A Systematic Review and Meta-Analysis. *Annals of Surgery* 2013;258(6):914-21. doi: 10.1097/SLA.0b013e3182895bb0
26. Tanaka H, Yukioka T, Yamaguti Y, et al. Surgical stabilization of internal pneumatic stabilization? A prospective randomized study of management of severe flail chest patients. *Journal of Trauma - Injury, Infection and Critical Care* 2002;52(4):727-32.
27. Granetzny A, Abd El-Aal M, Emam E, et al. Surgical versus conservative treatment of flail chest. Evaluation of the pulmonary status. *Interact Cardiovasc Thorac Surg* 2005;4(6):583-7. doi: 10.1510/icvts.2005.111807 [published Online First: 2007/08/03]
28. Marasco SF, Davies AR, Cooper J, et al. Prospective randomized controlled trial of operative rib fixation in traumatic flail chest. *Journal of the American College of Surgeons* 2013;216(5):924-32. doi: <http://dx.doi.org/10.1016/j.jamcollsurg.2012.12.024>
29. París F TV, Blasco E, Cantó A, Casillas M, Pastor J, et al. . Surgical stabilization of traumatic flail chest. *Thorax* 1975;30(5):521-7.
30. Kim M, Brutus P, Christides C, et al. [Compared results of flail chests treatments : standard internal pneumatic stabilization, new technics of assisted ventilation, osteosynthesis (author's transl)]. *Journal de chirurgie* 1981;118(8-9):499-503. [published Online First: 1981/09/01]
31. Karev DV. Operative management of the flail chest. *Wiadomosci lekarskie (Warsaw, Poland : 1960)* 1997;50 Suppl 1 Pt 2:205-8. [published Online First: 1997/01/01]
32. Ahmed Z, Mohyuddin Z. Management of flail chest injury: Internal fixation versus endotracheal intubation and ventilation. *Journal of Thoracic and Cardiovascular Surgery* 1995;110(6):1676-80. doi: <http://dx.doi.org/10.1016/S0022-5223%2895%2970030-7>
33. Voggenreiter G, Neudeck F, Aufmkolk M, et al. Operative chest wall stabilization in flail chest--outcomes of patients with or without pulmonary contusion. *J Am Coll Surg* 1998;187(2):130-8. [published Online First: 1998/08/15]
34. Balci AE, Eren S, Cakir O, et al. Open fixation in flail chest: Review of 64 patients. *Asian Cardiovascular and Thoracic Annals* 2004;12(1):11-15.
35. TENG Ji-ping CY-g, NI Da, et al. Outcomes of traumatic flail chest treated by operative fixation versus conservative approach. *Journal of Shanghai Jiaotong university (Medical Science)* 2009;29(12):1495.
36. Nirula R, Allen B, Layman R, et al. Rib fracture stabilization in patients sustaining blunt chest injury. *American Surgeon* 2006;72(4):307-09.

- 1
- 2
- 3 37. Althausen PL, Shannon S, Watts C, et al. Early surgical stabilization of flail chest with
- 4 locked plate fixation. *J Orthop Trauma* 2011;25(11):641-47. doi:
- 5 <http://dx.doi.org/10.1097/BOT.0b013e318234d479>
- 6
- 7 38. Granhed HP, Pazooki D. A feasibility study of 60 consecutive patients operated for
- 8 unstable thoracic cage. *J Trauma Manag Outcomes* 2014;8(1):20. doi:
- 9 10.1186/s13032-014-0020-z [published Online First: 2015/02/03]
- 10
- 11 39. Doben AR, Eriksson EA, Denlinger CE, et al. Surgical rib fixation for flail chest deformity
- 12 improves liberation from mechanical ventilation. *J Crit Care* 2014;29(1):139-43. doi:
- 13 <http://dx.doi.org/10.1016/j.jcrc.2013.08.003>
- 14
- 15 40. Jayle CP, Allain G, Ingrand P, et al. Flail chest in polytraumatized patients: surgical
- 16 fixation using Stracos reduces ventilator time and hospital stay. *Biomed Res Int*
- 17 2015;2015:624723. doi: <http://dx.doi.org/10.1155/2015/624723>
- 18
- 19 41. Pieracci FM, Lin Y, Rodil M, et al. A prospective, controlled clinical evaluation of surgical
- 20 stabilization of severe rib fractures. *Journal of Trauma and Acute Care Surgery*
- 21 2016;80(2):187-94. doi: <http://dx.doi.org/10.1097/TA.0000000000000925>
- 22
- 23 42. Zhang Y, Tang X, Xie H, et al. Comparison of surgical fixation and nonsurgical
- 24 management of flail chest and pulmonary contusion. *Am J Emerg Med*
- 25 2015;33(7):937-40. doi: <http://dx.doi.org/10.1016/j.ajem.2015.04.005>
- 26
- 27 43. Wada T, Yasunaga H, Inokuchi R, et al. Effectiveness of surgical rib fixation on
- 28 prolonged mechanical ventilation in patients with traumatic rib fractures: A propensity
- 29 score-matched analysis. *J Crit Care* 2015;30(6):1227-31. doi:
- 30 <http://dx.doi.org/10.1016/j.jcrc.2015.07.027>
- 31
- 32 44. Xu JQ, Qiu PL, Yu RG, et al. Better short-term efficacy of treating severe flail chest with
- 33 internal fixation surgery compared with conservative treatments. *European Journal of*
- 34 *Medical Research* 2015;24 doi: <http://dx.doi.org/10.1186/s40001-015-0146-0>
- 35
- 36 45. Majercik S, Vijayakumar S, Olsen G, et al. Surgical stabilization of severe rib fractures
- 37 decreases incidence of retained hemothorax and empyema. *Am J Surg*
- 38 2015;210(6):1112-17. doi: <http://dx.doi.org/10.1016/j.amjsurg.2015.08.008>
- 39
- 40 46. Defreest L, Tafen M, Bhakta A, et al. Open reduction and internal fixation of rib fractures
- 41 in polytrauma patients with flail chest. *Am J Surg* 2016;211(4):761-67. doi:
- 42 <http://dx.doi.org/10.1016/j.amjsurg.2015.11.014>
- 43
- 44 47. Ohresser P, Amoros JF, Leonardelli M, et al. [The functional sequelae of closed thoracic
- 45 injuries (apropos of 92 cases)]. *Le Poumon et le coeur* 1972;28(3):145-50. [published
- 46 Online First: 1972/01/01]
- 47
- 48 48. Hellberg K, de Vivie ER, Fuchs K, et al. Stabilization of flail chest by compression
- 49 osteosynthesis--experimental and clinical results. *Thorac Cardiovasc Surg*
- 50 1981;29(5):275-81.
- 51
- 52 49. Menard A, Testart J, Philippe JM, et al. TREATMENT OF FLAIL CHEST WITH JUDET
- 53 STRUTS. *Journal of Thoracic and Cardiovascular Surgery* 1983;86(2):300-05.
- 54
- 55 50. Mouton W, Lardinois D, Furrer M, et al. Long-term follow-up of patients with operative
- 56 stabilisation of a flail chest. *Thorac Cardiovasc Surg* 1997;45(5):242-4.
- 57
- 58 51. Cacchione RN, Richardson JD, Seligson D. Painful nonunion of multiple rib fractures
- 59 managed by operative stabilization. *Journal of Trauma - Injury, Infection and Critical*
- 60 *Care* 2000;48(2):319-21.
- 52 52. Lardinois D, Krueger T, Dusmet M, et al. Pulmonary function testing after operative
- 53 stabilisation of the chest wall for flail chest. *Eur J Cardiothorac Surg* 2001;20(3):496-
- 54 501. doi: <http://dx.doi.org/10.1016/S1010-7940%2801%2900818-1>
- 55
- 56 53. Kerr-Valentic MA, Arthur M, Mullins RJ, et al. Rib fracture pain and disability: can we do
- 57 better? *J Trauma* 2003;54(6):1058-63; discussion 63-4. doi:
- 58 10.1097/01.ta.0000060262.76267.ef [published Online First: 2003/06/19]
- 59
- 60 54. Gasparri MG, Almassi GH, Haasler GB. Surgical management of multiple rib fractures. *Chest* 2003;124(4):295S-96S.
- 55 55. Borrelly J, Aazami MH. New insights into the pathophysiology of flail segment: The
- 56 implications of anterior serratus muscle in parietal failure. *Eur J Cardiothorac Surg*
- 57 2005;28(5):742-49. doi: <http://dx.doi.org/10.1016/j.ejcts.2005.08.017>



- 1  
2  
3  
4  
5  
6  
7  
8  
9  
10  
11  
12  
13  
14  
15  
16  
17  
18  
19  
20  
21  
22  
23  
24  
25  
26  
27  
28  
29  
30  
31  
32  
33  
34  
35  
36  
37  
38  
39  
40  
41  
42  
43  
44  
45  
46  
47  
48  
49  
50  
51  
52  
53  
54  
55  
56  
57  
58  
59  
60
56. Campbell N, Conaglen P, Martin K, et al. Surgical stabilization of rib fractures using inion OTPS wraps-techniques and quality of life follow-up. *Journal of Trauma - Injury, Infection and Critical Care* 2009;67(3):596-601. doi: <http://dx.doi.org/10.1097/TA.0b013e3181ad8cb7>
  57. Mayberry JC, Kroeker AD, Ham LB, et al. Long-Term Morbidity, Pain, and Disability after Repair of Severe Chest Wall Injuries. *Am Surg* 2009;75(5):389-94.
  58. Richardson JD, Franklin GA, Heffley S, et al. Operative fixation of chest wall fractures: An underused procedure? *American Surgeon* 2007;73(6):591-96.
  59. Barajas PMD, Otero MDP, Sanchez-Gracian CD, et al. Surgical fixation of rib fractures with clips and titanium bars (STRATOS (TM) System). Preliminary experience. *Cirugia Espanola* 2010;88(3):180-86. doi: 10.1016/j.ciresp.2010.06.004
  60. Higgins JPT, Green, S. *Cochrane Handbook for Systematic Reviews of Interventions* 2011.
  61. Nickerson TP, Kim BD, Zielinski MD, et al. Use of a 90degree drill and screwdriver for rib fracture stabilization. *World journal of surgery* 2015;39(3):789-93. doi: <http://dx.doi.org/10.1007/s00268-014-2862-y>
  62. Garner P, Hopewell S, Chandler J, et al. When and how to update systematic reviews: consensus and checklist. *BMJ* 2016;354 doi: 10.1136/bmj.i3507
  63. Lund H, Juhl C, Christensen R. Systematic reviews and research waste. *The Lancet*;387(10014):123-24. doi: 10.1016/S0140-6736(15)01354-9
  64. Booth A, Clarke M, Dooley G, et al. The nuts and bolts of PROSPERO: an international prospective register of systematic reviews. *Systematic Reviews* 2012;1:2-2. doi: 10.1186/2046-4053-1-2
  65. Moher D, Booth A, Stewart L. How to reduce unnecessary duplication: use PROSPERO. *BJOG: An International Journal of Obstetrics & Gynaecology* 2014;121(7):784-86. doi: 10.1111/1471-0528.12657
  66. EMSurg Collaborators. Methodological overview of systematic reviews to establish the evidence base for emergency general surgery. *Br J Surg* 2017;104(5):513-24. doi: 10.1002/bjs.10476 [published Online First: 2017/03/16]
  67. Higgins JPT, Thompson SG, Deeks JJ, et al. Measuring inconsistency in meta-analyses. *BMJ : British Medical Journal* 2003;327(7414):557-60.
  68. Featherstone RM, Dryden DM, Foisy M, et al. Advancing knowledge of rapid reviews: an analysis of results, conclusions and recommendations from published review articles examining rapid reviews. *Syst Rev* 2015;4:50. doi: 10.1186/s13643-015-0040-4 [published Online First: 2015/05/01]

## SUPPORTING INFORMATION CAPTIONS

Figure 1 PRISMA Flow diagram

Table 1 Review characteristics

Table 2 Primary studies included in each review and the number of included patients

Table 3 Risk of bias using ROBIS tool

Table 4 Results of individual reviews that report a meta-analysis for flail chest

**Table 5 Results of individual reviews that report a narrative synthesis for flail chest**

Table 6 Results of individual reviews that report a narrative synthesis for multiple rib fractures

S Appendix 1 Medline search strategy

S Appendix 2 Excluded studies

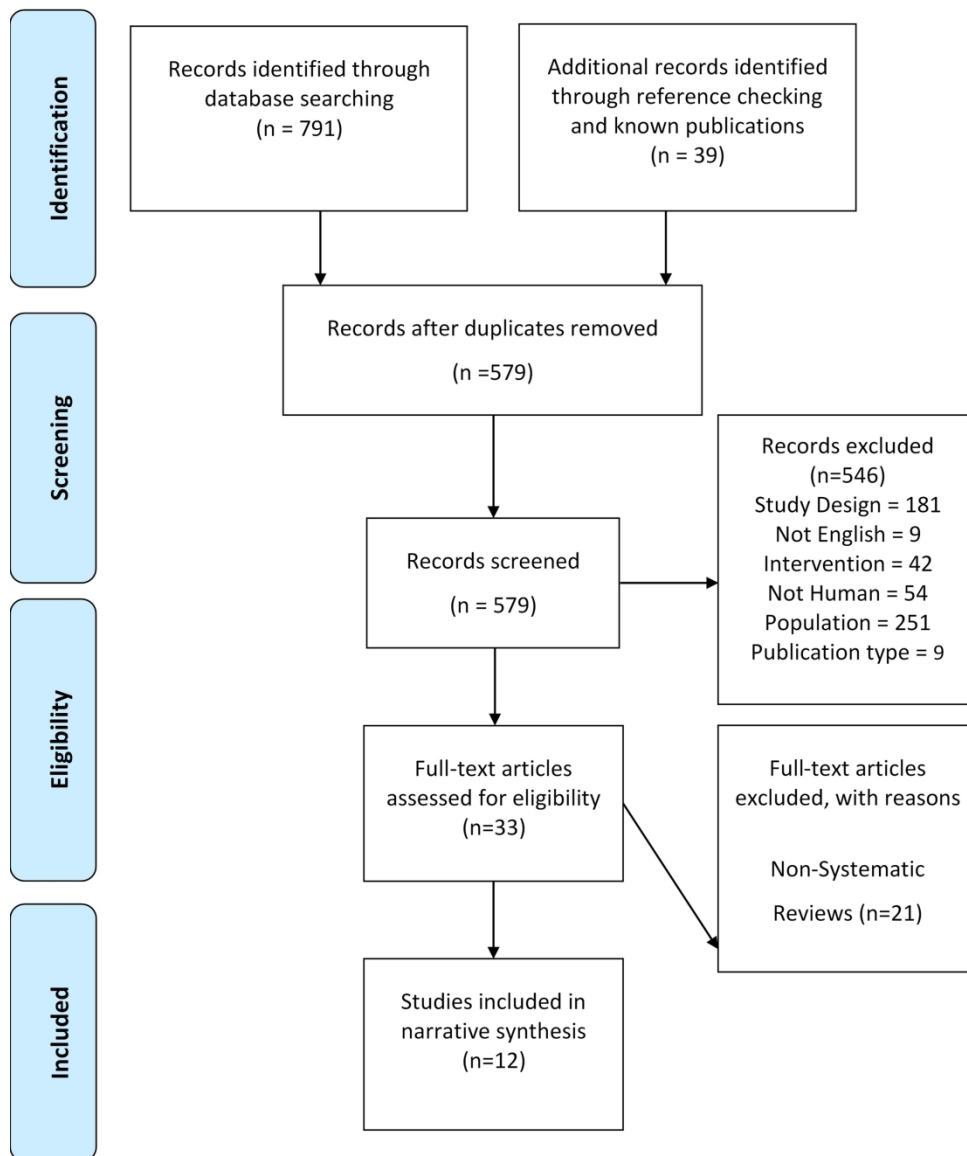

PRISMA Flow Diagram

262x313mm (300 x 300 DPI)



**Additional file 1 MEDLINE search strategy (OVID interface)**

1. (rib adj3 fracture\*).mp. [mp=title, abstract, original title, name of substance word, subject heading word, keyword heading word, protocol supplementary concept word, rare disease supplementary concept word, unique identifier]
2. ((flail chest or stove? in) adj3 chest).mp. [mp=title, abstract, original title, name of substance word, subject heading word, keyword heading word, protocol supplementary concept word, rare disease supplementary concept word, unique identifier]
3. (blunt chest adj3 trauma).mp. [mp=title, abstract, original title, name of substance word, subject heading word, keyword heading word, protocol supplementary concept word, rare disease supplementary concept word, unique identifier]
4. extra thoracic injur\*.mp. [mp=title, abstract, original title, name of substance word, subject heading word, keyword heading word, protocol supplementary concept word, rare disease supplementary concept word, unique identifier]
5. costal fracture\*.mp. [mp=title, abstract, original title, name of substance word, subject heading word, keyword heading word, protocol supplementary concept word, rare disease supplementary concept word, unique identifier]
6. Flail Chest/
7. Rib Fractures/
8. 1 or 2 or 3 or 4 or 5 or 6 or 7
9. (fracture\* adj3 fixation).mp. [mp=title, abstract, original title, name of substance word, subject heading word, keyword heading word, protocol supplementary concept word, rare disease supplementary concept word, unique identifier]
10. bone screw\*.mp. [mp=title, abstract, original title, name of substance word, subject heading word, keyword heading word, protocol supplementary concept word, rare disease supplementary concept word, unique identifier]
11. Bone plate\*.mp. [mp=title, abstract, original title, name of substance word, subject heading word, keyword heading word, protocol supplementary concept word, rare disease supplementary concept word, unique identifier]

1  
2  
3  
4  
5  
6  
7  
8  
9  
10  
11  
12  
13  
14  
15  
16  
17  
18  
19  
20  
21  
22  
23  
24  
25  
26  
27  
28  
29  
30  
31  
32  
33  
34  
35  
36  
37  
38  
39  
40  
41  
42  
43  
44  
45  
46  
47  
48  
49  
50  
51  
52  
53  
54  
55  
56  
57  
58  
59  
60

12. (suture adj3 fixation).mp. [mp=title, abstract, original title, name of substance word, subject heading word, keyword heading word, protocol supplementary concept word, rare disease supplementary concept word, unique identifier]

13. judet strut.mp. [mp=title, abstract, original title, name of substance word, subject heading word, keyword heading word, protocol supplementary concept word, rare disease supplementary concept word, unique identifier]

14. bioabsorbable plate\*.mp. [mp=title, abstract, original title, name of substance word, subject heading word, keyword heading word, protocol supplementary concept word, rare disease supplementary concept word, unique identifier]

15. heavy suture\*.mp. [mp=title, abstract, original title, name of substance word, subject heading word, keyword heading word, protocol supplementary concept word, rare disease supplementary concept word, unique identifier]

16. intramedullary splint\*.mp. [mp=title, abstract, original title, name of substance word, subject heading word, keyword heading word, protocol supplementary concept word, rare disease supplementary concept word, unique identifier]

17. (metal adj2 fixation).mp. [mp=title, abstract, original title, name of substance word, subject heading word, keyword heading word, protocol supplementary concept word, rare disease supplementary concept word, unique identifier]

18. ((plate\* or strut) adj3 fixation\*).mp. [mp=title, abstract, original title, name of substance word, subject heading word, keyword heading word, protocol supplementary concept word, rare disease supplementary concept word, unique identifier]

19. exp Internal Fixators/

20. fracture fixation/ or fracture fixation, internal/ or fracture fixation, intramedullary/

21. (fracture adj3 stabilisation).mp. [mp=title, abstract, original title, name of substance word, subject heading word, keyword heading word, protocol supplementary concept word, rare disease supplementary concept word, unique identifier]

22. 10 or 11 or 12 or 13 or 14 or 15 or 16 or 17 or 18 or 19 or 20 or 21

1  
2  
3  
4  
5  
6  
7  
8  
9  
10  
11  
12  
13  
14  
15  
16  
17  
18  
19  
20  
21  
22  
23  
24  
25  
26  
27  
28  
29  
30  
31  
32  
33  
34  
35  
36  
37  
38  
39  
40  
41  
42  
43  
44  
45  
46  
47  
48  
49  
50  
51  
52  
53  
54  
55  
56  
57  
58  
59  
60

23. 8 and 22  
24. limit 23 to (humans and yr="1976 -Current")

For peer review only

## Additional content 2 Excluded studies with reasons given for exclusion

|    |                                                                                                                                                                                                                                                              |              |
|----|--------------------------------------------------------------------------------------------------------------------------------------------------------------------------------------------------------------------------------------------------------------|--------------|
| 1  | Galan G, Penalver JC, Paris F, et al. BLUNT CHEST INJURIES IN 1696 PATIENTS. <i>Eur J Cardiothorac Surg.</i> 1992; 6: 284-7.                                                                                                                                 | Study Design |
| 2  | Actis Dato GM, Aidala E and Ruffini E. Surgical management of flail chest. <i>Ann Thorac Surg.</i> 1999; 67: 1826-7.                                                                                                                                         | Study Design |
| 3  | Ahmed Z and Mohyuddin Z. Management of flail chest injury: Internal fixation versus endotracheal intubation and ventilation. <i>Journal of Thoracic and Cardiovascular Surgery.</i> 1995; 110: 1676-80.                                                      | Study Design |
| 4  | Akkus M, Utkusavas A, Hanozu M, Kaya M and Bakir I. Stabilization of Flail Chest and Fractured Sternum by Minimally Invasive Repair of Pectus Excavatum. <i>Thoracic and Cardiovascular Surgeon Reports.</i> 2015; 4: 11-3.                                  | Study Design |
| 5  | Althausen PL, Shannon S, Watts C, et al. Early surgical stabilization of flail chest with locked plate fixation. <i>J Orthop Trauma.</i> 2011; 25: 641-7.                                                                                                    | Study Design |
| 6  | Ananiadou O, Karaiskos T, Givissis P and Drossos G. Operative stabilization of skeletal chest injuries secondary to cardiopulmonary resuscitation in a cardiac surgical patient. <i>Interact Cardiovasc Thorac Surg.</i> 2010; 10: 478-80.                   | Study Design |
| 7  | Attia RQ, Schulte KL and Whitaker DC. eReply: In patients with acute flail chest does surgical rib fixation improve outcomes in terms of morbidity and mortality? <i>Interactive Cardiovascular and Thoracic Surgery.</i> 2016; 23: 319-20.                  | Study Design |
| 8  | Bailey J, VanderHeiden T, Burlew CC, et al. Thoracic hyperextension injury with complete "bony disruption" of the thoracic cage: Case report of a potentially life-threatening injury. <i>World Journal of Emergency Surgery.</i> 2012; 7.                   | Study Design |
| 9  | Beelen R, Rumbaut J and De Geest R. Surgical stabilization of a rib fracture using an angle stable plate. <i>Journal of Trauma - Injury, Infection and Critical Care.</i> 2007; 63: 1159-60.                                                                 | Study Design |
| 10 | Beltrami V, Martinelli G, Giansante P and Gentile K. An original technique for surgical stabilisation of traumatic flail chest. <i>Thorax.</i> 1978; 33: 528-9.                                                                                              | Study Design |
| 11 | Berthet JP, Solovei L, Tiffet O, et al. Chest-wall reconstruction in case of infection of the operative site: Is there any interest in titanium rib osteosynthesis. <i>Eur J Cardiothorac Surg.</i> 2013; 44: 866-74.                                        | Study Design |
| 12 | Bibas BJ and Bibas RA. Operative stabilization of flail chest using a prosthetic mesh and methylmethacrylate. <i>Eur J Cardiothorac Surg.</i> 2006; 29: 1064-6.                                                                                              | Study Design |
| 13 | Bille A, Okiror L, Campbell A, Simons J and Routledge T. Evaluation of long-term results and quality of life in patients who underwent rib fixation with titanium devices after trauma. <i>General Thoracic and Cardiovascular Surgery.</i> 2013; 61: 345-9. | Study Design |

|    |                                                                                                                                                                                                                                              |              |
|----|----------------------------------------------------------------------------------------------------------------------------------------------------------------------------------------------------------------------------------------------|--------------|
| 14 | Bille A, Okiror L, Karenovics W and Routledge T. Experience with titanium devices for rib fixation and coverage of chest wall defects. <i>Interactive Cardiovascular and Thoracic Surgery</i> . 2012; 15: 588-95.                            | Study Design |
| 15 | Bonne SL, Turnbull IR and Southard RE. Technique for repair of fractures and separations involving the cartilaginous portions of the anterior chest wall. <i>Chest</i> . 2015; 147: e199-e204.                                               | Study Design |
| 16 | Borrelly J and Aazami MH. New insights into the pathophysiology of flail segment: The implications of anterior serratus muscle in parietal failure. <i>Eur J Cardiothorac Surg</i> . 2005; 28: 742-9.                                        | Study Design |
| 17 | Bottlang M, Long WB, Phelan D, Fielder D and Madey SM. Surgical stabilization of flail chest injuries with MatrixRIB implants: A prospective observational study. <i>Injury</i> . 2013; 44: 232-8.                                           | Study Design |
| 18 | Brotzu G, Montisci R, Pillai W and Sanna S. Chest injuries. A review of 195 patients. <i>Ann Chir Gynaecol</i> . 1988; 77: 155-9.                                                                                                            | Study Design |
| 19 | Buyukkarabacak YB, Sengul AT, Celik B, et al. The Usefulness of Early Surgical Rib Stabilization in Flail Chest. <i>Acta Chir Belg</i> . 2015; 115: 408-13.                                                                                  | Study Design |
| 20 | Cacchione RN, Richardson JD and Seligson D. Painful nonunion of multiple rib fractures managed by operative stabilization. <i>Journal of Trauma - Injury, Infection and Critical Care</i> . 2000; 48: 319-21.                                | Study Design |
| 21 | Campbell N, Conaglen P, Martin K and Antippa P. Surgical stabilization of rib fractures using inion OTPS wraps-techniques and quality of life follow-up. <i>Journal of Trauma - Injury, Infection and Critical Care</i> . 2009; 67: 596-601. | Study Design |
| 22 | Caragounis EC, Olsen MF, Pazooki D and Granhed H. Surgical treatment of multiple rib fractures and flail chest in trauma: a one-year follow-up study. <i>World Journal of Emergency Surgery</i> . 2016; 11.                                  | Study Design |
| 23 | Chapman BC, Herbert B, Rodil M, et al. RibScore: A novel radiographic score based on fracture pattern that predicts pneumonia, respiratory failure, and tracheostomy. <i>J Trauma Acute Care Surg</i> . 2016; 80: 95-101.                    | Study Design |
| 24 | Charafeddine AH, Stone ME, Reddy SH, Teperman SH, Kaban JM and Cohen-Levy WB. Anterior chest wall disassociation: A pattern associated with serious underlying injury. <i>Am Surg</i> . 2015; 81: E244-E5.                                   | Study Design |
| 25 | Cho YH, Kim HK, Kang DY and Choi YH. Reoperative surgical stabilization of a painful nonunited rib fracture using bone grafting and a metal plate. <i>J Orthop Trauma</i> . 2009; 23: 605-6.                                                 | Study Design |
| 26 | De La Santa Barajas PM, Polo Otero MD, Delgado Sanchez- Gracian C, Leal Ruiloba S, Trinidad C and Choren Duran M. Surgical treatment for flail chest. <i>Interactive Cardiovascular and Thoracic Surgery</i> . 2012; 15: S5.                 | Study Design |
| 27 | De Moya M, Bramos T, Agarwal S, et al. Pain as an indication for rib fixation: A bi-institutional pilot study. <i>Journal of Trauma -</i>                                                                                                    | Study Design |

|    |                                                                                                                                                                                                                                              |              |
|----|----------------------------------------------------------------------------------------------------------------------------------------------------------------------------------------------------------------------------------------------|--------------|
|    | Injury, Infection and Critical Care. 2011; 71: 1750-4.                                                                                                                                                                                       |              |
| 28 | de Palma A, Sollitto F, Loizzi D, et al. Chest wall stabilization and reconstruction: Short and long-term results 5 years after the introduction of a new titanium plates system. Journal of Thoracic Disease. 2016; 8: 490-8.               | Study Design |
| 29 | Dean NC, Van Boerum DH and Liou TG. Rib plating of acute and sub-acute non-union rib fractures in an adult with cystic fibrosis: a case report. BMC Res Notes. 2014; 7: 681.                                                                 | Study Design |
| 30 | Defreest L, Tafen M, Bhakta A, et al. Open reduction and internal fixation of rib fractures in polytrauma patients with flail chest. Am J Surg. 2016; 211: 761-7.                                                                            | Study Design |
| 31 | Dehghan N, de Mestral C, McKee MD, Schemitsch EH and Nathens A. Flail chest injuries: A review of outcomes and treatment practices from the National Trauma Data Bank. Journal of Trauma and Acute Care Surgery. 2014; 76: 462-8.            | Study Design |
| 32 | Doben AR, Eriksson EA, Denlinger CE, et al. Surgical rib fixation for flail chest deformity improves liberation from mechanical ventilation. J Crit Care. 2014; 29: 139-43.                                                                  | Study Design |
| 33 | Dunlop RLE, Tiong W, Veerasingam D and Kelly JL. Novel use of hand fracture fixation plates in the surgical stabilisation of flail chest. Journal of Plastic, Reconstructive and Aesthetic Surgery. 2010; 63: e51-e3.                        | Study Design |
| 34 | Engel C, Krieg JC, Madey SM, Long WB and Bottlang M. Operative chest wall fixation with osteosynthesis plates. Journal of Trauma - Injury, Infection and Critical Care. 2005; 58: 181-6.                                                     | Study Design |
| 35 | Evman S, Kolbas I, Dogruyol T and Tezel C. A Case of Traumatic Flail Chest Requiring Stabilization with Surgical Reconstruction. Thoracic and Cardiovascular Surgeon Reports. 2015; 4: 8-10.                                                 | Study Design |
| 36 | Fagevik Olsén M, Pazooki D and Granhed H. Recovery after stabilising surgery for 'flail chest'. Unfallchirurgie. 2013; 39: 501-6.                                                                                                            | Study Design |
| 37 | Farquhar J, Almahrabi Y, Slobogean G, et al. No benefit to surgical fixation of flail chest injuries compared with modern comprehensive management: results of a retrospective cohort study. Canadian Journal of Surgery. 2016; 59: 299-303. | Study Design |
| 38 | Flagel BT, Luchette FA, Reed RL, et al. Half-a-dozen ribs: the breakpoint for mortality. Surgery. 2005; 138: 717-23; discussion 23-5.                                                                                                        | Study Design |
| 39 | Gabram SGA, Devanney J, Jones D and Jacobs LM. Delayed hemorrhagic pericardial effusion: Case reports of a complication from severe blunt chest trauma. Journal of Trauma. 1992; 32: 794-800.                                                | Study Design |
| 40 | Galvin IF, Costa R and Murton M. FRACTURED RIB WITH PENETRATING CARDIOPULMONARY INJURY. Ann Thorac Surg. 1993; 56: 558-9.                                                                                                                    | Study Design |

|    |                                                                                                                                                                                                                                                                          |              |
|----|--------------------------------------------------------------------------------------------------------------------------------------------------------------------------------------------------------------------------------------------------------------------------|--------------|
| 41 | Gardenbroek TJ, Bemelman M and Leenen LPH. Pseudarthrosis of the ribs treated with a locking compression plate: A report of three cases. <i>Journal of Bone and Joint Surgery - Series A</i> . 2009; 91: 1477-9.                                                         | Study Design |
| 42 | Gasparri MG, Almassi GH and Haasler GB. Surgical management of multiple rib fractures. <i>Chest</i> . 2003; 124: 295S-6S.                                                                                                                                                | Study Design |
| 43 | George RJ and Stern HS. An approach to surgical fixation of traumatic costosternal diastasis. <i>ANZ J Surg</i> . 2014; 84: 594-5.                                                                                                                                       | Study Design |
| 44 | Gerov I and Yablanski V. Damage control - Increasing the survival rates through emergency bone stabilization in a polytraumatized young patient. <i>Injury</i> . 2011; 42: S29.                                                                                          | Study Design |
| 45 | Ginsberg RJ and Kostin RF. 5. New approaches to the management of flail chest. <i>Can Med Assoc J</i> . 1977; 116: 613-5.                                                                                                                                                | Study Design |
| 46 | Govaert G, Schuetz M and Peters P. Rib fixation for a traumatic 'stove-in chest': An option to consider. <i>ANZ J Surg</i> . 2012; 82: 276-7.                                                                                                                            | Study Design |
| 47 | Granetzny A, Abd El-Aal M, Emam E, Shalaby A and Boseila A. Surgical versus conservative treatment of flail chest. Evaluation of the pulmonary status. <i>Interact Cardiovasc Thorac Surg</i> . 2005; 4: 583-7.                                                          | Study Design |
| 48 | Granhed HP and Pazooki D. A feasibility study of 60 consecutive patients operated for unstable thoracic cage. <i>J Trauma Manag Outcomes</i> . 2014; 8: 20.                                                                                                              | Study Design |
| 49 | Guernelli N, Bragaglia RB, Briccoli A, Mastroilli M and Vecchi R. Technique for the management of anterior flail chest. <i>Thorax</i> . 1979; 34: 247-8.                                                                                                                 | Study Design |
| 50 | Gunn JM, Savola J and Isotalo K. Left-sided diaphragmatic and pericardial ruptures with subluxation of the heart after blunt trauma. <i>Ann Thorac Surg</i> . 2012; 93: 317-9.                                                                                           | Study Design |
| 51 | Haasler GB. Open fixation of flail chest after blunt trauma. <i>Ann Thorac Surg</i> . 1990; 49: 993-5.                                                                                                                                                                   | Study Design |
| 52 | Hasenboehler EA, Bernard AC, Bottiggi AJ, et al. Treatment of traumatic flail chest with muscular sparing open reduction and internal fixation: Description of a surgical technique. <i>Journal of Trauma - Injury, Infection and Critical Care</i> . 2011; 71: 494-501. | Study Design |
| 53 | Hellberg K, de Vivie ER, Fuchs K, et al. Stabilization of flail chest by compression osteosynthesis--experimental and clinical results. <i>Thorac Cardiovasc Surg</i> . 1981; 29: 275-81.                                                                                | Study Design |
| 54 | Igai H, Kamiyoshihara M, Nagashima T and Ohtaki Y. Rib fixation for severe chest deformity due to multiple rib fractures. <i>Annals of Thoracic and Cardiovascular Surgery</i> . 2012; 18: 458-61.                                                                       | Study Design |
| 55 | Ivancic A, Saftic I, Cicvaric T, et al. Initial experience with external thoracic stabilization by the "figure of eight" osteosynthesis in                                                                                                                               | Study Design |



|    |                                                                                                                                                                                                                                             |              |
|----|---------------------------------------------------------------------------------------------------------------------------------------------------------------------------------------------------------------------------------------------|--------------|
|    | polytraumatized patients with flail chest injury. <i>Coll Antropol.</i> 2009; 33: 51-6.                                                                                                                                                     |              |
| 56 | Jayle CP, Allain G, Ingrand P, et al. Flail chest in polytraumatized patients: surgical fixation using Stracos reduces ventilator time and hospital stay. <i>Biomed Res Int.</i> 2015; 2015: 624723.                                        | Study Design |
| 57 | Kamiyoshihara M, Nagashima T, Ibe T and Takeyoshi I. Rupture of the diaphragm and pericardium with cardiac herniation after blunt chest trauma. <i>General Thoracic and Cardiovascular Surgery.</i> 2010; 58: 291-4.                        | Study Design |
| 58 | Kaplan T, Gulbahar G, Gundogdu AG and Han S. An unexpected complication of titanium rib clips. <i>Ann Thorac Surg.</i> 2014; 98: 2206-9.                                                                                                    | Study Design |
| 59 | Ke S, Duan H, Cai Y, Kang J and Feng Z. Thoracoscopy-assisted minimally invasive surgical stabilization of the anterolateral flail chest using Nuss bars. <i>Ann Thorac Surg.</i> 2014; 97: 2179-82.                                        | Study Design |
| 60 | Khandelwal G, Mathur RK, Shukla S and Maheshwari A. A prospective single center study to assess the impact of surgical stabilization in patients with rib fracture. <i>Int J Surg.</i> 2011; 9: 478-81.                                     | Study Design |
| 61 | Kilic D, Findikcioglu A, Akin S, et al. Factors affecting morbidity and mortality in flail chest: Comparison of anterior and lateral location. <i>Thoracic and Cardiovascular Surgeon.</i> 2011; 59: 45-8.                                  | Study Design |
| 62 | Kim JJ, Kim YH, Moon SW, Choi SY and Jeong SC. Nuss procedure for severe flail chest after blunt trauma. <i>Ann Thorac Surg.</i> 2015; 99: e25-7.                                                                                           | Study Design |
| 63 | Konstantinov IE, Saxena P and Wood DJ. Stabilisation of chronic flail chest: A novel approach of surgical fixation and osteogenesis. <i>Thorax.</i> 2009; 64: 265-6.                                                                        | Study Design |
| 64 | Kruger M, Zinne N, Zhang RY, et al. Multidirectional Thoracic Wall Stabilization: A New Device on the Scene. <i>Ann Thorac Surg.</i> 2013; 96: 1846-9.                                                                                      | Study Design |
| 65 | Kulaylat AN, Chesnut CH, 3rd, Santos AP and Armen SB. Successful operative rib fixation of traumatic flail chest in a patient with osteogenesis imperfecta. <i>Interact Cardiovasc Thorac Surg.</i> 2014; 19: 518-9.                        | Study Design |
| 66 | Landreneau RJ, Hinson Jr JM, Hazelrigg SR, Johnson JA, Boley TM and Curtis JJ. Strut fixation of an extensive flail chest. <i>Ann Thorac Surg.</i> 1991; 51: 473-5.                                                                         | Study Design |
| 67 | Lang M, Krumrey MT, Roder J, Ulmer J, Friederichs J and Buhren V. Late complications following blunt abdominal and thoracic trauma: Two case reports of a minimally invasive therapy. [German, English]. <i>Chirurg.</i> 2012; 83: 1078-81. | Study Design |
| 68 | Lang-Lazdunski L, Bonnet PM, Pons F, Brinquin L and Jancovici R. Traumatic extrathoracic lung herniation. <i>Ann Thorac Surg.</i>                                                                                                           | Study Design |



|    |                                                                                                                                                                                                                                                                                                 |              |
|----|-------------------------------------------------------------------------------------------------------------------------------------------------------------------------------------------------------------------------------------------------------------------------------------------------|--------------|
|    | 2002; 74: 927-9.                                                                                                                                                                                                                                                                                |              |
| 69 | Lanier ST, Wetterau M, Smith-Singares E, et al. Management of pulmonary hernia through a flail segment in closed thoracic trauma using open reduction, internal fixation and pectoralis major flap reconstruction: A case report. <i>Canadian Journal of Plastic Surgery</i> . 2011; 19: 145-7. | Study Design |
| 70 | Lardinois D, Krueger T, Dusmet M, Ghisletta N, Gugger M and Ris HB. Pulmonary function testing after operative stabilisation of the chest wall for flail chest. <i>Eur J Cardiothorac Surg</i> . 2001; 20: 496-501.                                                                             | Study Design |
| 71 | Lee SA, Hwang JJ, Chee HK, Kim YH and Lee WS. Flail chest stabilization with Nuss operation in presence of multiple myeloma. <i>Journal of Thoracic Disease</i> . 2014; 6: E43-E7.                                                                                                              | Study Design |
| 72 | Lee SK and Kang DK. Nuss procedure for surgical stabilization of flail chest with horizontal sternal body fracture and multiple bilateral rib fractures. <i>Journal of Thoracic Disease</i> . 2016; 8: E390-E2.                                                                                 | Study Design |
| 73 | Lee SY, Lee SJ, Lee CS and Lee KR. Spontaneous fractures of judet struts. <i>Journal of Trauma - Injury, Infection and Critical Care</i> . 2009; 67: 214.                                                                                                                                       | Study Design |
| 74 | Leenstra BS, Stolwijk A and Poeze M. Surgical stabilisation in a 13-year-old boy with traumatic flail chest. <i>BMJ Case Rep</i> . 2015; 2015 (no pagination).                                                                                                                                  | Study Design |
| 75 | Majercik S, Cannon Q, Granger SR, Van Boerum DH and White TW. Regarding: Long-term patient outcomes after surgical stabilization of rib fractures. <i>Am J Surg</i> . 2015; 210: 199-200.                                                                                                       | Study Design |
| 76 | Majercik S, Cannon Q, Granger SR, Vanboerum DH and White TW. Long-term patient outcomes after surgical stabilization of rib fractures. <i>Am J Surg</i> . 2014; 208: 88-92.                                                                                                                     | Study Design |
| 77 | Majercik S, Vijayakumar S, Olsen G, et al. Surgical stabilization of severe rib fractures decreases incidence of retained hemothorax and empyema. <i>Am J Surg</i> . 2015; 210: 1112-7.                                                                                                         | Study Design |
| 78 | Marasco S, Cooper J, Pick A and Kossmann T. Pilot study of operative fixation of fractured ribs in patients with flail chest. <i>ANZ J Surg</i> . 2009; 79: 804-8.                                                                                                                              | Study Design |
| 79 | Marasco S, Liew S, Edwards E, Varma D and Summerhayes R. Analysis of bone healing in flail chest injury: Do we need to fix both fractures per rib? <i>Journal of Trauma and Acute Care Surgery</i> . 2014; 77: 452-8.                                                                           | Study Design |
| 80 | Marasco S, Quayle M, Summerhayes R, Sutalo ID and Liovic P. An assessment of outcomes with intramedullary fixation of fractured ribs. <i>J Cardiothorac Surg</i> . 2016; 11.                                                                                                                    | Study Design |

|    |                                                                                                                                                                                                                                                       |              |
|----|-------------------------------------------------------------------------------------------------------------------------------------------------------------------------------------------------------------------------------------------------------|--------------|
| 81 | Marasco SF, Davies AR, Cooper J, et al. Prospective randomized controlled trial of operative rib fixation in traumatic flail chest. <i>J Am Coll Surg</i> . 2013; 216: 924-32.                                                                        | Study Design |
| 82 | Maury JM, Roquet G, Marcotte G and David JS. Surgical fixation of rib fractures in chest wall trauma. <i>Intensive Care Med</i> . 2015; 41: 1483-4.                                                                                                   | Study Design |
| 83 | Maxwell CA, Mion LC and Dietrich MS. Hospitalized injured older adults: clinical utility of a rib fracture scoring system. <i>J Trauma Nurs</i> . 2012; 19: 168-74; quiz 75-6.                                                                        | Study Design |
| 84 | Mayberry JC, Ham LB, Schipper PH, Ellis TJ and Mullins RJ. Surveyed opinion of American trauma, orthopedic, and thoracic surgeons on rib and sternal fracture repair. <i>J Trauma</i> . 2009; 66: 875-9.                                              | Study Design |
| 85 | Mayberry JC, Kroeker AD, Ham LB, Mullins RJ and Trunkey DD. Long-Term Morbidity, Pain, and Disability after Repair of Severe Chest Wall Injuries. <i>Am Surg</i> . 2009; 75: 389-94.                                                                  | Study Design |
| 86 | Mayberry JC, Terhes JT, Ellis TJ, Wanek S and Mullins RJ. Absorbable Plates for Rib Fracture Repair: Preliminary Experience. <i>Journal of Trauma - Injury, Infection and Critical Care</i> . 2003; 55: 835-9.                                        | Study Design |
| 87 | Menard A, Testart J, Philippe JM and Grise P. TREATMENT OF FLAIL CHEST WITH JUDET STRUTS. <i>Journal of Thoracic and Cardiovascular Surgery</i> . 1983; 86: 300-5.                                                                                    | Study Design |
| 88 | Messing JA, Gall V and Sarani B. Successful management of severe flail chest via early operative intervention. <i>J Trauma Nurs</i> . 2014; 21: 83-5.                                                                                                 | Study Design |
| 89 | Metin B and Intepe YS. Operative ease and efficiency of nitinol memory rib plaque on the multiple costa and sternum fractures: Three-year clinical experience. <i>International Journal of Clinical and Experimental Medicine</i> . 2016; 9: 11510-7. | Study Design |
| 90 | Michelet P and Boussen S. Case scenario - thoracic trauma. <i>Annales Francaises D Anesthesie Et De Reanimation</i> . 2013; 32: 504-9.                                                                                                                | Study Design |
| 91 | Michelitsch C, Acklin YP, Hassig G, Sommer C and Furrer M. Operative stabilisation of chest wall trauma: Single center report of initial management and longterm outcome. <i>Respiration</i> . 2016; 91 (5): 456.                                     | Study Design |
| 92 | Mintz AC, Albano A, Reisdorff EJ, Choe KA and Lillegard W. Stress fracture of the first rib from serratus anterior tension: an unusual mechanism of injury. <i>Ann Emerg Med</i> . 1990; 19: 411-4.                                                   | Study Design |
| 93 | Morodomi Y, Okamoto T, Tagawa T, et al. A novel method of using bioabsorbable materials for the surgical repair of flail chest. <i>Journal of Trauma and Acute Care Surgery</i> . 2016; 81: 984-7.                                                    | Study Design |

|     |                                                                                                                                                                                                                                                                                   |              |
|-----|-----------------------------------------------------------------------------------------------------------------------------------------------------------------------------------------------------------------------------------------------------------------------------------|--------------|
| 94  | Moslam KE, Badawy MS and Asida SM. Evaluation of respiratory functions in chest trauma patients treated with thoracic wall stabilization. <i>Egyptian Journal of Chest Diseases and Tuberculosis</i> . 2015; 64: 213-7.                                                           | Study Design |
| 95  | Mouton W, Lardinois D, Furrer M, Regli B and Ris HB. Long-term follow-up of patients with operative stabilisation of a flail chest. <i>Thorac Cardiovasc Surg</i> . 1997; 45: 242-4.                                                                                              | Study Design |
| 96  | Muhm M, Harter J, Weiss C and Winkler H. Severe trauma of the chest wall: surgical rib stabilisation versus non-operative treatment. <i>European Journal of Trauma and Emergency Surgery</i> . 2013; 39: 257-65.                                                                  | Study Design |
| 97  | Nagaie T, Tateishi H and Minagawa S. New method for the internal stabilisation of flail chest. <i>Eur J Surg</i> . 1992; 158: 613-4.                                                                                                                                              | Study Design |
| 98  | Ng ABY, Giannoudis PV, Bismil Q, Hinsche AF and Smith RM. Operative stabilisation of painful non-united multiple rib fractures. <i>Injury</i> . 2001; 32: 637-9.                                                                                                                  | Study Design |
| 99  | Nickerson TP, Kim BD, Zielinski MD, Jenkins D and Schiller HJ. Use of a 90degree drill and screwdriver for rib fracture stabilization. <i>World J Surg</i> . 2015; 39: 789-93.                                                                                                    | Study Design |
| 100 | Nickerson TP, Thiels CA, Kim BD, Zielinski MD, Jenkins DH and Schiller HJ. Outcomes of Complete Versus Partial Surgical Stabilization of Flail Chest. <i>World J Surg</i> . 2016; 40: 236-41.                                                                                     | Study Design |
| 101 | Nicolau AE, Merlan V, Ciupan R, et al. Postoperative early enteral nutrition in a patient with politrauma and late duodenal perforation. <i>Chirurgia</i> . 2008; 103: 111-5.                                                                                                     | Study Design |
| 102 | Nirula R, Allen B, Layman R, Falimirski ME and Somberg LB. Rib fracture stabilization in patients sustaining blunt chest injury. <i>Am Surg</i> . 2006; 72: 307-9.                                                                                                                | Study Design |
| 103 | Noonan TJ, Sakryd G, Espinoza LM and Packer D. Posterior rib stress fracture in professional baseball pitchers. <i>American Journal of Sports Medicine</i> . 2007; 35: 654-8.                                                                                                     | Study Design |
| 104 | Olsen MF, Sloba M, Klarin L, Caragounis EC, Pazooki D and Granhed H. Physical function and pain after surgical or conservative management of multiple rib fractures - a follow-up study. <i>Scandinavian Journal of Trauma Resuscitation &amp; Emergency Medicine</i> . 2016; 24. | Study Design |
| 105 | Ovadia P, Szewczyk D and Rabinovici R. Bilateral cervical rib fracture secondary to blunt trauma. <i>J Trauma</i> . 1997; 43: 157-8.                                                                                                                                              | Study Design |
| 106 | Oyamatsu H, Ohata N and Narita K. New technique for fixing rib fracture with bioabsorbable plate. <i>Asian Cardiovascular and Thoracic Annals</i> . 2016; 24: 736-8.                                                                                                              | Study Design |
| 107 | Oyarzun JR, Bush AP, McCormick JR and Bolanowski PJP. Use of 3.5-mm acetabular reconstruction plates for internal fixation of                                                                                                                                                     | Study Design |

|     |                                                                                                                                                                                                                                                                                                          |              |
|-----|----------------------------------------------------------------------------------------------------------------------------------------------------------------------------------------------------------------------------------------------------------------------------------------------------------|--------------|
|     | flail chest injuries. <i>Ann Thorac Surg.</i> 1998; 65: 1471-4.                                                                                                                                                                                                                                          |              |
| 108 | Pape HC, Remmers D, Rice J, Ebisch M, Krettek C and Tscherne H. Appraisal of early evaluation of blunt chest trauma: Development of a standardized scoring system for initial clinical decision making. <i>Journal of Trauma-Injury Infection and Critical Care.</i> 2000; 49: 496-504.                  | Study Design |
| 109 | Perna V and Morera R. Prognostic factors in chest traumas: A prospective study of 500 patients. <i>Cirugía Española (English Edition).</i> 2016; 94: 165-70.                                                                                                                                             | Study Design |
| 110 | Pieracci FM, Johnson JL, Stovall RT and Jurkovich GJ. Completely thoracoscopic, intra-pleural reduction and fixation of severe rib fractures. <i>Trauma Case Reports.</i> 2015; 1: 39-43.                                                                                                                | Study Design |
| 111 | Pieracci FM, Lin Y, Rodil M, et al. A prospective, controlled clinical evaluation of surgical stabilization of severe rib fractures. <i>Journal of Trauma and Acute Care Surgery.</i> 2016; 80: 187-94.                                                                                                  | Study Design |
| 112 | Pieracci FM, Majercik S, Ali-Osman F, et al. Consensus statement: Surgical stabilization of rib fractures rib fracture colloquium clinical practice guidelines. <i>Injury.</i> 2016; 48: 307-21.                                                                                                         | Study Design |
| 113 | Pieracci FM, Rodil M, Stovall RT, et al. Surgical stabilization of severe rib fractures. <i>Journal of Trauma and Acute Care Surgery.</i> 2015; 78: 883-7.                                                                                                                                               | Study Design |
| 114 | Pimakhov V and Belov O. Optimization of chest stabilization methods for acute respiratory distress-syndrome prophylaxy and treatment in patients with craniothoracic trauma. <i>Interactive Cardiovascular and Thoracic Surgery.</i> 2014; 18: S60.                                                      | Study Design |
| 115 | Pimakhov V. Assessment of long-term outcome of different rib fracture stabilization methods for patients with craniothoracic trauma. <i>Interactive Cardiovascular and Thoracic Surgery Conference: 23rd European Conference on General Thoracic Surgery Lisbon Portugal Conference Start.</i> 2015; 21. | Study Design |
| 116 | Pompili C, Brunelli A, Xiume F and Sabbatini A. Chest wall reconstruction with a titanium rib bridge for post-traumatic parietal hernia. <i>Eur J Cardiothorac Surg.</i> 2010; 37: 737.                                                                                                                  | Study Design |
| 117 | Pressley CM, Fry WR, Philp AS, Berry SD and Smith RS. Predicting outcome of patients with chest wall injury. <i>Am J Surg.</i> 2012; 204: 910-4.                                                                                                                                                         | Study Design |
| 118 | Puranik G and Gillham N. Bilateral fractured clavicles with multiple rib fractures. <i>Emerg Med J.</i> 2007; 24: 675.                                                                                                                                                                                   | Study Design |
| 119 | Puranik G and Gillham N. Bilateral fractured clavicles with multiple rib fractures.[Erratum appears in <i>Emerg Med J.</i> 2007 Dec;24(12):867]. <i>Emerg Med J.</i> 2007; 24: 675.                                                                                                                      | Study Design |

|     |                                                                                                                                                                                                                                                                                                                                                                                                            |              |
|-----|------------------------------------------------------------------------------------------------------------------------------------------------------------------------------------------------------------------------------------------------------------------------------------------------------------------------------------------------------------------------------------------------------------|--------------|
| 120 | Pushkin S and Benyan A. Our first steps in osteosynthesis of fractured ribs using Matrix Rib technologies. European Respiratory Journal Conference: European Respiratory Society Annual Congress. 2012; 40.                                                                                                                                                                                                | Study Design |
| 121 | Qiu M, Shi Z, Xiao J, Zhang X, Ling S and Ling H. Potential Benefits of Rib Fracture Fixation in Patients with Flail Chest and Multiple Non-flail Rib Fractures. Indian Journal of Surgery. 2016; 78: 458-63.                                                                                                                                                                                              | Study Design |
| 122 | Ramponi F, Meredith GT, Bendinelli C and Soderlund T. Operative management of flail chest with anatomical locking plates (MatrixRib). ANZ J Surg. 2012; 82: 658-9.                                                                                                                                                                                                                                         | Study Design |
| 123 | Reber P, Ris HB, Inderbitzi R, Stark B and Nachbur B. Osteosynthesis of the injured chest wall: Use of the AO (Arbeitsgemeinschaft fur Osteosynthese) technique. Scandinavian Journal of Thoracic and Cardiovascular Surgery. 1993; 27: 137-42.                                                                                                                                                            | Study Design |
| 124 | Reber PU, Kniemeyer HW, Ris HB, et al. Reconstruction plates for internal fixation of flail chest [4] (multiple letters). Ann Thorac Surg. 1998; 66: 2158.                                                                                                                                                                                                                                                 | Study Design |
| 125 | Redwan B, Reichelt J, Freermann S, Semik M and Fischer S. Video-assisted minimally invasive rib osteosynthesis using intramedullary titanium splints in patients with unstable rib fractures: Treatment algorithm and first clinical results. Interactive Cardiovascular and Thoracic Surgery Conference: 23rd European Conference on General Thoracic Surgery Lisbon Portugal Conference Start. 2015; 21. | Study Design |
| 126 | Richardson JD, Franklin GA, Heffley S and Seligson D. Operative fixation of chest wall fractures: An underused procedure? Am Surg. 2007; 73: 591-6.                                                                                                                                                                                                                                                        | Study Design |
| 127 | Sahin MS, Ergun T, Cakmak G and Akyuz M. Posterior sternoclavicular joint dislocation with first rib fracture and ipsilateral vocal cord palsy. Journal of Emergency Medicine. 2012; 42: e121-e3.                                                                                                                                                                                                          | Study Design |
| 128 | Said SM, Goussous N, Zielinski MD, Schiller HJ and Kim BD. Surgical stabilization of flail chest: the impact on postoperative pulmonary function. European Journal of Trauma and Emergency Surgery. 2014; 40: 501-5.                                                                                                                                                                                       | Study Design |
| 129 | Sanchez-Lloret J, Letang E, Mateu M, et al. Indications and surgical treatment of the traumatic flail chest syndrome. An original technique. The Thoracic and cardiovascular surgeon. 1982; 30: 294-7.                                                                                                                                                                                                     | Study Design |
| 130 | Sarani B, Schulte L and Diaz JJ. Pitfalls associated with open reduction and internal fixation of fractured ribs. Injury. 2015; 46: 2335-40.                                                                                                                                                                                                                                                               | Study Design |
| 131 | Sawan TG, Nickerson TP, Thiels CA, et al. Load Sharing, not Load Bearing Plates: Lessons Learned from Failure of Rib Fracture Stabilization. The American surgeon. 2016; 82: E15-E7.                                                                                                                                                                                                                       | Study Design |

|     |                                                                                                                                                                                                                                                                                 |              |
|-----|---------------------------------------------------------------------------------------------------------------------------------------------------------------------------------------------------------------------------------------------------------------------------------|--------------|
| 132 | Schmit-Neuerburg KP, Weiss H and Labitzke R. Indication for thoracotomy and chest wall stabilization. <i>Injury</i> . 1982; 14: 26-34.                                                                                                                                          | Study Design |
| 133 | Schnuriger B and Lerf B. Unstable thorax after a coughing fit in a 70-year-old adipose patient. <i>Chirurg</i> . 2006; 77: 459-62.                                                                                                                                              | Study Design |
| 134 | Schulz-Drost S, Oppel P, Grupp S, et al. Surgical Fixation of Sternal Fractures: Preoperative Planning and a Safe Surgical Technique Using Locked Titanium Plates and Depth Limited Drilling. <i>Jove-Journal of Visualized Experiments</i> . 2015.                             | Study Design |
| 135 | Sekizawa A, Yanagawa Y, Nishi K, Takasu A and Sakamoto T. A case of thoracic degloving injury with flail chest. <i>Am J Emerg Med</i> . 2011; 29.                                                                                                                               | Study Design |
| 136 | Sellers E, Fearon P, Vincent A, Barnard S and Williams J. Rib fracture fixation and duration of ventilatory support: A single centre experience. <i>British Journal of Surgery</i> . 2013; 100: 216-.                                                                           | Study Design |
| 137 | Sellers EL, Fearon PV, Ripley C, Vincent A, Barnard S and Williams JR. The introduction of rib fracture fixation for traumatic flail chest injury: A single centre experience. <i>Trauma (United Kingdom)</i> . 2013; 15: 245-51.                                               | Study Design |
| 138 | Sherman JE, Salzberg A, Raskin NM and Beattie EJ. Chest Wall Stabilization Using Plate Fixation. <i>The Annals of Thoracic Surgery</i> . 1988; 46: 467-9.                                                                                                                       | Study Design |
| 139 | Skedros JG, Mears CS, Langston TD, Van Boerum DH and White TW. Medial scapular winging associated with rib fractures and plating corrected with pectoralis major transfer. <i>International Journal of Surgery Case Reports</i> . 2014; 5: 750-3.                               | Study Design |
| 140 | Slater MS, Mayberry JC and Trunkey DD. Operative stabilization of a flail chest six years after injury. <i>Ann Thorac Surg</i> . 2001; 72: 600-1.                                                                                                                               | Study Design |
| 141 | Solberg BD, Moon CN, Nissim AA, Wilson MT and Margulies DR. Treatment of chest wall implosion injuries without thoracotomy: Technique and clinical outcomes. <i>Journal of Trauma - Injury, Infection and Critical Care</i> . 2009; 67: 8-13.                                   | Study Design |
| 142 | Stadler M and Boogaerts JG. Dramatic improvement in oxygenation after sternotomy in a patient with acute respiratory distress syndrome. <i>Anaesthesia and Intensive Care</i> . 2012; 40: 352-4.                                                                                | Study Design |
| 143 | Tanaka H, Yukioka T, Yamaguti Y, et al. Surgical stabilization of internal pneumatic stabilization? A prospective randomized study of management of severe flail chest patients. <i>Journal of Trauma - Injury, Infection and Critical Care</i> . 2002; 52: 727-32.             | Study Design |
| 144 | Tarng YW, Liu YY, Huang FD, Lin HL, Wu TC and Chou YP. The surgical stabilization of multiple rib fractures using titanium elastic nail in blunt chest trauma with acute respiratory failure. <i>Surgical Endoscopy and Other Interventional Techniques</i> . 2016; 30: 388-95. | Study Design |
| 145 | Taylor BC, Fowler TT, French BG and Dominguez N. Clinical Outcomes of Surgical Stabilization of Flail Chest Injury. <i>Journal of</i>                                                                                                                                           | Study Design |



|     |                                                                                                                                                                                                                                                          |              |
|-----|----------------------------------------------------------------------------------------------------------------------------------------------------------------------------------------------------------------------------------------------------------|--------------|
|     | the American Academy of Orthopaedic Surgeons. 2016; 24: 575-80.                                                                                                                                                                                          |              |
| 146 | Taylor BC, French BG and Fowler TT. Surgical approaches for rib fracture fixation. <i>J Orthop Trauma</i> . 2013; 27: e168-e73.                                                                                                                          | Study Design |
| 147 | TENG Ji-ping CY-g, NI Da, et al. Outcomes of traumatic flail chest treated by operative fixation versus conservative approach. <i>Journal of Shanghai Jiaotong university (Medical Science)</i> . 2009; 29: 1495.                                        | Study Design |
| 148 | Thiels CA, Aho JM, Naik ND, et al. Infected hardware after surgical stabilization of rib fractures: Outcomes and management experience. <i>Journal of Trauma and Acute Care Surgery</i> . 2016; 17.                                                      | Study Design |
| 149 | Thomas AN, Blaisdell FW, Lewis FR, Jr. and Schlobohm RM. Operative stabilization for flail chest after blunt trauma. <i>J Thorac Cardiovasc Surg</i> . 1978; 75: 793-801.                                                                                | Study Design |
| 150 | Tiffet O, Susset V, Thevenet F, Sulaiman A, Molliex S and Zeni F. Anterior flay chest and nuss technique. <i>Interactive Cardiovascular and Thoracic Surgery</i> . 2011; 13: S14.                                                                        | Study Design |
| 151 | Tshomba Y, Bertoglio L, Marone EM, Psacharopulo D, Iob G and Chiesa R. Graft perforation by a dislocated rib fracture after open thoracoabdominal aortic repair: Emergent endovascular and open repair. <i>J Endovasc Ther</i> . 2010; 17: 126-30.       | Study Design |
| 152 | Van Peteghem S and Gevaert S. Tension pneumopericardium after blunt chest trauma. <i>Acta Cardiologica</i> . 2015; 70: 83.                                                                                                                               | Study Design |
| 153 | Vodicka J, Safranek J, Spidlen V, Vesely V, Ferda J and Louda J. Reconstruction of a crushed chest with HI-TEX (R) PARP NT implant. <i>Unfallchirurg</i> . 2007; 110: 255-8.                                                                             | Study Design |
| 154 | Voggenreiter G, Neudeck F, Aufmkolk M, Obertacke U and Schmit-Neuerburg KP. Operative chest wall stabilization in flail chest--outcomes of patients with or without pulmonary contusion. <i>J Am Coll Surg</i> . 1998; 187: 130-8.                       | Study Design |
| 155 | Vyhnanek F, Skala P and Skrabalova D. A contribution of multidetector computed tomography to indications for chest wall stabilisation in multiple rib fractures. <i>Acta Chirurgiae Orthopaedicae et Traumatologiae Cechoslovaca</i> . 2011; 78: 258-61. | Study Design |
| 156 | Wada T, Yasunaga H, Inokuchi R, et al. Effectiveness of surgical rib fixation on prolonged mechanical ventilation in patients with traumatic rib fractures: A propensity score-matched analysis. <i>J Crit Care</i> . 2015; 30: 1227-31.                 | Study Design |
| 157 | Wang S, Bao Z and Luo LF. Kirschner wire migration from the right second rib to the right ventricle: a case report. <i>Chin J Traumatol</i> . 2013; 16: 292-4.                                                                                           | Study Design |
| 158 | Webb LX and Meredith JW. A method for operative stabilization of multiple rib fractures in patients with flail chest. <i>Techniques in Orthopaedics</i> . 1991; 6: 1-9.                                                                                  | Study Design |
| 159 | Wiese MN, Kawel-Boehm N, de la Santa PM, et al. Functional results after chest wall stabilization with a new screwless fixation                                                                                                                          | Study Design |

|     |                                                                                                                                                                                                                                                                      |              |
|-----|----------------------------------------------------------------------------------------------------------------------------------------------------------------------------------------------------------------------------------------------------------------------|--------------|
|     | device. <i>Eur J Cardiothorac Surg.</i> 2015; 47: 868-75.                                                                                                                                                                                                            |              |
| 160 | Wu W-M, Yang Y, Gao Z-L, Zhao T-C and He W-W. Which is better to multiple rib fractures, surgical treatment or conservative treatment? <i>International Journal of Clinical and Experimental Medicine.</i> 2015; 8: 7930-6.                                          | Study Design |
| 161 | Xu JQ, Qiu PL, Yu RG, Gong SR, Ye Y and Shang XL. Better short-term efficacy of treating severe flail chest with internal fixation surgery compared with conservative treatments. <i>European Journal of Medical Research.</i> 2015; 24.                             | Study Design |
| 162 | Yanagawa Y, Kaneko N, Hagiwara A, Kimura T and Isoda S. Delayed sudden cardiac arrest induced by aortic injury with a posterior fracture of the left rib. <i>Gen Thorac Cardiovasc Surg.</i> 2008; 56: 91-2.                                                         | Study Design |
| 163 | Yang Y, Dong L-w and Wang J. Memory alloy embracing fixator in treatment of multiple fractured ribs and flail chest. <i>World Journal of Emergency Medicine.</i> 2010; 1: 212-5.                                                                                     | Study Design |
| 164 | Zehr M, Klar N and Malthaner RA. Risk Score for Predicting Mortality in Flail Chest. <i>Ann Thorac Surg.</i> 2015; 100: 223-8.                                                                                                                                       | Study Design |
| 165 | Zhang W, Song F, Yang Y and Tang J. Asymptomatic intracardiac migration of a Kirschner wire from the right rib. <i>Interact Cardiovasc Thorac Surg.</i> 2014; 18: 525-6.                                                                                             | Study Design |
| 166 | Zhang XF, Guo ZQ, Zhao CC, Xu CY and Wang Z. Management of patients with flail chest by surgical fixation using claw-type titanium plate. <i>J Cardiothorac Surg.</i> 2015; 10.                                                                                      | Study Design |
| 167 | Zhang Y, Tang X, Xie H and Wang RL. Comparison of surgical fixation and nonsurgical management of flail chest and pulmonary contusion. <i>Am J Emerg Med.</i> 2015; 33: 937-40.                                                                                      | Study Design |
| 168 | Mayberry J. Early stabilization of flail chest with locked plate fixation. <i>J Orthop Trauma.</i> 2011; 25: 648.                                                                                                                                                    | Study Design |
| 169 | Mayberry J. Surgical stabilization of severe rib fractures: Several caveats. <i>Journal of Trauma and Acute Care Surgery.</i> 2015; 79: 515.                                                                                                                         | Study Design |
| 170 | McKay DR, Fawzy HF, McKay KM, Nitsch R and Mahoney JL. Are chest compressions safe for the patient reconstructed with sternal plates? Evaluating the safety of cardiopulmonary resuscitation using a human cadaveric model. <i>J Cardiothorac Surg.</i> 2010; 5: 64. | Study Design |
| 171 | Mirzatoioei F and Bazzazi A. Analysis of orthopedic injuries in an airplane landing disaster and a suggested mechanism of trauma. <i>European Journal of Orthopaedic Surgery and Traumatology.</i> 2013; 23: 257-62.                                                 | Study Design |
| 172 | Mohan CPVR and Mohan R. Management of warfare chest injuries. <i>Medical Journal Armed Forces India.</i> 2010; 66: 329-32.                                                                                                                                           | Study Design |
| 173 | Molnar TF. Surgical management of chest wall trauma. <i>Thorac Surg Clin.</i> 2010; 20: 475-85.                                                                                                                                                                      | Study Design |



|     |                                                                                                                                                                                                                                        |              |
|-----|----------------------------------------------------------------------------------------------------------------------------------------------------------------------------------------------------------------------------------------|--------------|
| 174 | Moore B. Operative stabilization of nonpenetrating chest injuries. <i>Journal of Cardiovascular Surgery</i> . 1975; 70: 619–30.                                                                                                        | Study Design |
| 175 | Paris F TV, Blasco E, Cantó A, Casillas M, Pastor J, et al. . Surgical stabilization of traumatic flail chest. <i>Thorax</i> . 1975; 30: 521-7.                                                                                        | Study Design |
| 176 | Paydar S, Mousavi SM, Niakan H, Abbasi HR and Bolandparvaz S. Appropriate management of flail chest needs proper injury classification. <i>J Am Coll Surg</i> . 2012; 215: 743-4.                                                      | Study Design |
| 177 | Reber PU, Kniemeyer HW and Ris HB. Reconstruction plates for internal fixation of flail chest. <i>Ann Thorac Surg</i> . 1998; 66: 2158.                                                                                                | Study Design |
| 178 | Ricci WM, McAndrew C, Merriman D and Gardner MJ. What's new in orthopaedic trauma. <i>Journal of Bone and Joint Surgery - Series A</i> . 2011; 93: 1746-56.                                                                            | Study Design |
| 179 | Samarrai AR. Costosynthetic stabilization of massive chest wall instability. <i>Int Surg</i> . 1990; 75: 231-3.                                                                                                                        | Study Design |
| 180 | Shah TJ. On internal fixation for flail chest. <i>J Thorac Cardiovasc Surg</i> . 1996; 112: 849-50.                                                                                                                                    | Study Design |
| 181 | Leo F, Venissac N, Lopez S, Pop D, Savinelli F and Mouroux J. Anterior flail chest and sternal fracture: To fix or not to fix? <i>Asian Cardiovascular and Thoracic Annals</i> . 2003; 11: 188.                                        | Study Design |
| 182 | Vyhnanek F, Jirava D, Ocadlik M and Skrabalova D. Surgical Stabilisation of Flail Chest Injury: Indications, Technique and Results. <i>Acta Chirurgiae Orthopaedicae Et Traumatologiae Cechoslovaca</i> . 2015; 82: 303-7.             | Not English  |
| 183 | Vodicka J, Spidlen V, Safranek J, Simanek V and Altmann P. Severe injury to the chest wall - Experience with surgical therapy. <i>Zentralblatt Fur Chirurgie</i> . 2007; 132: 542-6.                                                   | Not English  |
| 184 | Barajas PMD, Otero MDP, Sanchez-Gracian CD, et al. Surgical fixation of rib fractures with clips and titanium bars (STRATOS (TM) System). Preliminary experience. <i>Cirurgia Espanola</i> . 2010; 88: 180-6.                          | Not English  |
| 185 | Di Fabio D, Benetti D, Benvenuti M and Mombelloni G. [Surgical stabilization of post-traumatic flail chest. Our experience with 116 cases treated]. <i>Minerva Chir</i> . 1995; 50: 227-33.                                            | Not English  |
| 186 | Quaranta M and Vassallo G. Indications and technique of costal osteosynthesis in the flail chest. <i>Quaderni di Cooperazione Sanitaria</i> . 1985; NO. 2: 61-7.                                                                       | Not English  |
| 187 | Kakegawa S, Kamiyoshihara M, Ohtaki A, Ohki S and Morishita Y. [Surgical fixation of the ribs for flail chest injuries]. <i>Kyobu geka The Japanese journal of thoracic surgery</i> . 2006; 59: 974-9.                                 | Not English  |
| 188 | Jimenez-Quijano A, Varon-Cotes JC, Garcia-Herreros-Hellal LG, Espinosa-Moya B, Rivero-Rapalino O and Salazar-Marulanda M. Rib cage osteosynthesis. Literature review and case reports. <i>Cirurgia Y Cirujanos</i> . 2015; 83: 339-44. | Not English  |

|     |                                                                                                                                                                                                                                                                |              |
|-----|----------------------------------------------------------------------------------------------------------------------------------------------------------------------------------------------------------------------------------------------------------------|--------------|
| 189 | Nolasco-de la Rosa AL, Mosinoz-Montes R, Matehuala-Garcia J, Roman-Guzman E, Quero-Sandoval F and Reyes-Miranda AL. Unstable thorax fixation with bioabsorbable plates and screws. Presentation of a case series. <i>Cirugia Y Cirujanos</i> . 2015; 83: 23-8. | Not English  |
| 190 | Padilla JMC, Nadal SB, Kurowski K, Munoz CG and Paniagua JMR. Use and versatility of titanium for the reconstruction of the thoracic wall. <i>Cirugia Espanola</i> . 2014; 92: 89-94.                                                                          | Not English  |
| 191 | Albaugh G, Kann B, Puc MM, Vemulapalli P, Marra S and Ross S. Age-adjusted outcomes in traumatic flail chest injuries in the elderly. <i>Am Surg</i> . 2000; 66: 978-81.                                                                                       | Intervention |
| 192 | Ali BA and Sanfilippo F. TS02 MANAGEMENT OF FLAIL CHEST IN TRAUMA: ANALYSIS OF RISK FACTORS AFFECTING OUTCOME. <i>ANZ J Surg</i> . 2007; 77: A93-A.                                                                                                            | Intervention |
| 193 | Anonymous. Management of the stove-in chest with paradoxical movement. <i>Br Med J</i> . 1977; 1: 1242.                                                                                                                                                        | Intervention |
| 194 | Athanassiadi K, Gerazounis M and Theakos N. Management of 150 flail chest injuries: analysis of risk factors affecting outcome. <i>Eur J Cardiothorac Surg</i> . 2004; 26: 373-6.                                                                              | Intervention |
| 195 | Athanassiadi K, Theakos N, Kalantzi N and Gerazounis M. Prognostic factors in flail-chest patients. <i>Eur J Cardiothorac Surg</i> . 2010; 38: 466-71.                                                                                                         | Intervention |
| 196 | Balci AE, Eren S, Cakir O and Eren MN. Open fixation in flail chest: Review of 64 patients. <i>Asian Cardiovascular and Thoracic Annals</i> . 2004; 12: 11-5.                                                                                                  | Intervention |
| 197 | Battle CE and Evans PA. Predictors of mortality in patients with flail chest: a systematic review. <i>Emerg Med J</i> . 2015; 32: 961-5.                                                                                                                       | Intervention |
| 198 | Bugaev N, Breeze JL, Alhazmi M, et al. Magnitude of rib fracture displacement predicts opioid requirements. <i>Journal of Trauma and Acute Care Surgery</i> . 2016; 81: 699-704.                                                                               | Intervention |
| 199 | California Uo. Early Aggressive Pain Management is Associated With Improved Outcomes in Blunt Thoracic Trauma. WHO clinical trials registry platform. 2011.                                                                                                    | Intervention |
| 200 | Cannon RM, Smith JW, Franklin GA, Harbrecht BG, Miller FB and Richardson JD. Flail chest injury: Are we making any progress? <i>Am Surg</i> . 2012; 78: 398-402.                                                                                               | Intervention |
| 201 | Fabbri C, Mazieri M, Cirocchi R, Bisacci R and Cagini L. [Flail chest]. <i>Minerva Chir</i> . 1996; 51: 669-73.                                                                                                                                                | Intervention |
| 202 | Freedland M, Wilson RF, Bender JS and Levison MA. The management of flail chest injury: factors affecting outcome. <i>J Trauma</i> . 1990; 30: 1460-8.                                                                                                         | Intervention |

|     |                                                                                                                                                                                                                                                            |              |
|-----|------------------------------------------------------------------------------------------------------------------------------------------------------------------------------------------------------------------------------------------------------------|--------------|
| 203 | Gordy S, Fabricant L, Ham B, Mullins R and Mayberry J. The contribution of rib fractures to chronic pain and disability. <i>Am J Surg.</i> 2014; 207: 659-62.                                                                                              | Intervention |
| 204 | Grosse A, Grosse C, Steinbach L and Anderson S. MRI findings of prolonged post-traumatic sternal pain. <i>Skeletal Radiology.</i> 2007; 36: 423-9.                                                                                                         | Intervention |
| 205 | Hameed M. Discussion. <i>Am J Surg.</i> 2014; 207: 662-3.                                                                                                                                                                                                  | Intervention |
| 206 | Hammad AMM and Regal MA. Is Routine Spiral CT-Chest Justified in Evaluation of the Major Blunt Trauma Patients? <i>European Journal of Trauma and Emergency Surgery.</i> 2009; 35: 31-4.                                                                   | Intervention |
| 207 | Hildebrand F, Giannoudis PV, van Griensven M, et al. Management of polytraumatized patients with associated blunt chest trauma: a comparison of two European countries. <i>Injury-International Journal of the Care of the Injured.</i> 2005; 36: 293-302. | Intervention |
| 208 | Ho. H-Y. Subcutaneous longitudinal acupuncture: a novel and effective approach to acute pain relief in inpatients with rib fracture. WHO clinical trials registry platform. 2012.                                                                          | Intervention |
| 209 | Karev DV. Operative management of the flail chest. <i>Wiadomosci lekarskie (Warsaw, Poland : 1960).</i> 1997; 50 Suppl 1 Pt 2: 205-8.                                                                                                                      | Intervention |
| 210 | Khalpey Z, Marsh KM, Ferng A, et al. First in man: Sternal reconstruction with autologous stem cells. <i>ASAIO Journal.</i> 2015; 61: e31-e2.                                                                                                              | Intervention |
| 211 | Lazcano A, Dougherty JM and Kruger M. Use of rib belts in acute rib fractures. <i>Am J Emerg Med.</i> 1989; 7: 97-100.                                                                                                                                     | Intervention |
| 212 | Lee KJ, Jung K, Kim J and Kwon J. Bone scan as a screening test for missed fractures in severely injured patients. <i>Orthopaedics and Traumatology: Surgery and Research.</i> 2014; 100: 953-7.                                                           | Intervention |
| 213 | Liman ST, Kuzucu A, Tastepe AI, Ulasan GN and Topcu S. Chest injury due to blunt trauma. <i>Eur J Cardiothorac Surg.</i> 2003; 23: 374-8.                                                                                                                  | Intervention |
| 214 | Marasco S, Lee G, Summerhayes R, Fitzgerald M and Bailey M. Quality of life after major trauma with multiple rib fractures. <i>Injury.</i> 2015; 46: 61-5.                                                                                                 | Intervention |
| 215 | Miller TL, Harris JD and Kaeding CC. Stress fractures of the ribs and upper extremities: causation, evaluation, and management. <i>Sports medicine (Auckland, NZ).</i> 2013; 43: 665-74.                                                                   | Intervention |
| 216 | Montréal Ud. Analgesic Effect of Intranasal Calcitonin on Patients With Fractured Ribs. <i>ClinicalTrialsgov.</i> 2007.                                                                                                                                    | Intervention |

|     |                                                                                                                                                                                                                                                                                                                      |              |
|-----|----------------------------------------------------------------------------------------------------------------------------------------------------------------------------------------------------------------------------------------------------------------------------------------------------------------------|--------------|
| 217 | Nau T, Aldrian S, Koenig F and Vecsei V. Fixation of femoral fractures in multiple-injury patients with combined chest and head injuries. <i>ANZ J Surg.</i> 2003; 73: 1018-21.                                                                                                                                      | Intervention |
| 218 | Nishiumi N, Fujimori S, Katoh N, Iwasaki M, Inokuchi S and Inoue H. Treatment with internal pneumatic stabilization for anterior flail chest. <i>Tokai Journal of Experimental and Clinical Medicine.</i> 2007; 32: 126-30.                                                                                          | Intervention |
| 219 | O'Connor LJ. Females and fractures. <i>Orthopaedic Physical Therapy Clinics of North America.</i> 1996; 5: 85-117.                                                                                                                                                                                                   | Intervention |
| 220 | Pulley BR, Taylor BC, Fowler TT, Dominguez N and Trinh TQ. Utility of three-dimensional computed tomography for the surgical management of rib fractures. <i>Journal of Trauma and Acute Care Surgery.</i> 2015; 78: 530-4.                                                                                          | Intervention |
| 221 | Richardson JD, Adams L and Flint LM. Selective management of flail chest and pulmonary contusion. <i>Annals of Surgery.</i> 1982; 196: 481-7.                                                                                                                                                                        | Intervention |
| 222 | Sherepo KM. A portable device for rib traction. <i>Biomedical Engineering.</i> 2004; 38: 296-8.                                                                                                                                                                                                                      | Intervention |
| 223 | Sivaloganathan M, Stephens R and Grocott M. Management of flail chest. <i>Hospital medicine (London, England : 1998).</i> 2000; 61: 811.                                                                                                                                                                             | Intervention |
| 224 | System TCH. Pain Relief for Ventilated Patients With Multiple Rib Fractures Using the ON-Q Pain Relief System. <i>ClinicalTrials.gov.</i> 2009.                                                                                                                                                                      | Intervention |
| 225 | Trupka A, Waydhas C, Hallfeldt KKJ, Nast-Kolb D, Pfeifer KJ and Schweiberer L. Value of thoracic computed tomography in the first assessment of severely injured patients with blunt chest trauma: Results of a prospective study. <i>Journal of Trauma - Injury, Infection and Critical Care.</i> 1997; 43: 405-11. | Intervention |
| 226 | Vana PG, Neubauer DC and Luchette FA. Contemporary management of flail chest. <i>Am Surg.</i> 2014; 80: 527-35.                                                                                                                                                                                                      | Intervention |
| 227 | Velmahos GC, Vassiliu P, Chan LS, Murray JA, Berne TV and Demetriades D. Influence of flail chest on outcome among patients with severe thoracic cage trauma. <i>Int Surg.</i> 2002; 87: 240-4.                                                                                                                      | Intervention |
| 228 | Wilson RF, Murray C and Antonenko DR. Nonpenetrating thoracic injuries. <i>Surgical Clinics of North America.</i> 1977; 57: 17-36.                                                                                                                                                                                   | Intervention |
| 229 | Yeginsu A, Ergin M and Gurlek K. A rare complication after Velpeau bandage: hemopneumothorax. <i>Ulusal Travma Ve Acil Cerrahi Dergisi-Turkish Journal of Trauma &amp; Emergency Surgery.</i> 2013; 19: 274-6.                                                                                                       | Intervention |
| 230 | Kamiyoshihara M, Kawatani N and Igai H. Modified application of a wound retractor for surgery in chest trauma. <i>Asian Cardiovascular and Thoracic Annals.</i> 2015; 23: 232-4.                                                                                                                                     | Intervention |

|     |                                                                                                                                                                                                                                                                     |              |
|-----|---------------------------------------------------------------------------------------------------------------------------------------------------------------------------------------------------------------------------------------------------------------------|--------------|
| 231 | McCunn M, Gordon EKB and Scott TH. Anesthetic Concerns in Trauma Victims Requiring Operative Intervention: The Patient Too Sick to Anesthetize. <i>Anesthesiology Clinics</i> . 2010; 28: 97-116.                                                                   | Intervention |
| 232 | Diethelm AG and Battle W. Management of flail chest injury: a review of 75 cases. <i>Am Surg</i> . 1971; 37: 667-70.                                                                                                                                                | Intervention |
| 233 | Agnew AM, Schafman M, Moorhouse K, White SE and Kang YS. The effect of age on the structural properties of human ribs. <i>Journal of the Mechanical Behavior of Biomedical Materials</i> . 2015; 41: 302-14.                                                        | Non- Human   |
| 234 | Ahern BJ and Levine DG. Multiple Rib Fracture Repair in a Neonatal Holstein Calf. <i>Veterinary Surgery</i> . 2009; 38: 787-90.                                                                                                                                     | Non- Human   |
| 235 | Bellezzo F, Hunt RJ, Provost P, Bain FT and Kirker-Head C. Surgical repair of rib fractures in 14 neonatal foals: case selection, surgical technique and results. <i>Equine Veterinary Journal</i> . 2004; 36: 557-62.                                              | Non- Human   |
| 236 | Blackburne WB, Waddell JN, Swain MV, de Sous RJA and Kieser JA. Biomechanical investigation of impact induced rib fractures of a porcine infant surrogate model. <i>Journal of the Mechanical Behavior of Biomedical Materials</i> . 2016; 62: 588-98.              | Non- Human   |
| 237 | Bottlang M, Helzel I, Long W, Fitzpatrick D and Madey S. Less-invasive stabilization of rib fractures by intramedullary fixation: A biomechanical evaluation. <i>Journal of Trauma - Injury, Infection and Critical Care</i> . 2010; 68: 1218-24.                   | Non- Human   |
| 238 | Bottlang M, Helzel I, Long WB and Madey S. Anatomically contoured plates for fixation of Rib fractures. <i>Journal of Trauma - Injury, Infection and Critical Care</i> . 2010; 68: 611-5.                                                                           | Non- Human   |
| 239 | Bottlang M, Helzel I, Long WB and Madey SM. Less-invasive stabilization of rib fractures by intramedullary fixation: A biomechanical evaluation of two techniques. <i>Chest Conference: American College of Chest Physicians Annual Meeting, CHEST</i> . 2009; 136. | Non- Human   |
| 240 | Bottlang M, Helzel I, Long WM and Madey S. Anatomically contoured plates for fixation of rib fractures. <i>Chest Conference: American College of Chest Physicians Annual Meeting, CHEST</i> . 2009; 136.                                                            | Non- Human   |
| 241 | Bottlang M, Walleser S, Noll M, et al. Biomechanical rationale and evaluation of an implant system for rib fracture fixation. <i>European Journal of Trauma and Emergency Surgery</i> . 2010; 36: 417-26.                                                           | Non- Human   |
| 242 | Campbell N, Richardson M and Antippa P. Biomechanical testing of two devices for internal fixation of fractured ribs. <i>Journal of Trauma - Injury, Infection and Critical Care</i> . 2010; 68: 1234-8.                                                            | Non- Human   |
| 243 | Casha AR, Camilleri L, Manche A, et al. Internal rib structure can be predicted using mathematical models: An anatomic study comparing the chest to a shell dome with application to understanding fractures. <i>Clinical Anatomy</i> . 2015; 28: 1008-16.          | Non- Human   |
| 244 | Downs C and Rodgeron D. The use of nylon cable ties to repair rib fractures in neonatal foals. <i>Canadian Veterinary Journal</i> -                                                                                                                                 | Non- Human   |

|     |                                                                                                                                                                                                                                                                                 |            |
|-----|---------------------------------------------------------------------------------------------------------------------------------------------------------------------------------------------------------------------------------------------------------------------------------|------------|
|     | Revue Veterinaire Canadienne. 2011; 52: 307-9.                                                                                                                                                                                                                                  |            |
| 245 | Fukunaga T, Yamashiro T, Oya S, Takeshita N, Takigawa M and Takano-Yamamoto T. Connective tissue growth factor mRNA expression pattern in cartilages is associated with their type I collagen expression. Bone. 2003; 33: 911-8.                                                | Non- Human |
| 246 | Gabrielli F, Subit D, Ogam E, Guillemain P, Kent RW and Masson C. Time-frequency analysis to detect bone fracture in impact biomechanics. Application to the thorax. Medical Engineering & Physics. 2009; 31: 952-8.                                                            | Non- Human |
| 247 | Goodspeed MJ, Vanderby R and Agarwal S. Mechanical testing of modeled rib fractures with plated fixation on the internal surface. Journal of Surgical Research. 2014; 186 (2): 663.                                                                                             | Non- Human |
| 248 | Gyhra A, Torres P, Pino J, Palacios S and Cid L. Experimental flail chest: Ventilatory function with fixation of flail segment in internal and external position. Journal of Trauma-Injury Infection and Critical Care. 1996; 40: 977-9.                                        | Non- Human |
| 249 | Helzel I, Long W, Fitzpatrick D, Madey S and Bottlang M. Evaluation of intramedullary rib splints for less-invasive stabilisation of rib fractures. Injury. 2009; 40: 1104-10.                                                                                                  | Non- Human |
| 250 | Huang KN, Xu ZF, Sun JX, et al. Stabilization of multiple rib fractures in a canine model. Journal of Surgical Research. 2014; 192: 621-7.                                                                                                                                      | Non- Human |
| 251 | Jerram RM and Herron MR. Scapular fractures in dogs. Compendium on Continuing Education for the Practicing Veterinarian. 1998; 20: 1254-+.                                                                                                                                      | Non- Human |
| 252 | Kato Y, Nakashima K, Iwamoto M, et al. EFFECTS OF INTERLEUKIN-1 ON SYNTHESSES OF ALKALINE-PHOSPHATASE, TYPE-X COLLAGEN, AND 1,25-DIHYDROXYVITAMIN-D(3) RECEPTOR, AND MATRIX CALCIFICATION IN RABBIT CHONDROCYTE CULTURES. Journal of Clinical Investigation. 1993; 92: 2323-30. | Non- Human |
| 253 | Kawahata H, Sotobayashi D, Aoki M, et al. Continuous infusion of angiotensin II modulates hypertrophic differentiation and apoptosis of chondrocytes in cartilage formation in a fracture model mouse. Hypertension Research. 2015; 38: 382-93.                                 | Non- Human |
| 254 | Kemper AR, Kennedy EA, McNally C, Manoogian SJ, Stitzel JD and Duma SM. Reducing Chest Injuries in Automobile Collisions: Rib Fracture Timing and Implications for Thoracic Injury Criteria. Annals of Biomedical Engineering. 2011; 39: 2141-51.                               | Non- Human |
| 255 | Kindig M, Lau AG and Kent RW. Biomechanical Response of Ribs Under Quasistatic Frontal Loading. Traffic Injury Prevention. 2011; 12: 377-87.                                                                                                                                    | Non- Human |
| 256 | Kraus BM, Richardson DW, Sheridan G and Wilkins PA. Multiple rib fracture in a neonatal foal using a nylon strand suture repair technique. Veterinary Surgery. 2005; 34: 399-404.                                                                                               | Non- Human |



|     |                                                                                                                                                                                                                                            |            |
|-----|--------------------------------------------------------------------------------------------------------------------------------------------------------------------------------------------------------------------------------------------|------------|
| 257 | Liovic P, Sutalo ID and Marasco SF. Stress analysis of a centrally fractured rib fixated by an intramedullary screw. <i>Computer Methods in Biomechanics and Biomedical Engineering</i> . 2014; 17: 944-57.                                | Non- Human |
| 258 | Liovic P, Sutalo ID and Marasco SF. Fixation of a human rib by an intramedullary telescoping splint anchored by bone cement. <i>Computer Methods in Biomechanics and Biomedical Engineering</i> . 2016; 19: 1297-305.                      | Non- Human |
| 259 | Lopez-Valdes FJ, Juste-Lorente O, Maza-Frechin M, et al. Analysis of occupant kinematics and dynamics in nearside oblique impacts. <i>Traffic Injury Prevention</i> . 2016; 17: 86-92.                                                     | Non- Human |
| 260 | Marasco SF, Liovic P and Sutalo ID. Structural integrity of intramedullary rib fixation using a single bioresorbable screw. <i>Journal of Trauma and Acute Care Surgery</i> . 2012; 73: 668-73.                                            | Non- Human |
| 261 | Marasco SF, Sutalo ID and Bui AV. Mode of failure of rib fixation with absorbable plates: A clinical and numerical modeling study. <i>Journal of Trauma - Injury, Infection and Critical Care</i> . 2010; 68: 1225-33.                     | Non- Human |
| 262 | McDonald AC, Schuijers JA, Shen PJ, Gundlach AL and Grills BL. Expression of galanin and galanin receptor-1 in normal bone and during fracture repair in the rat. <i>Bone</i> . 2003; 33: 788-97.                                          | Non- Human |
| 263 | Mohr M, Abrams E, Engel C, Long WB and Bottlang M. Geometry of human ribs pertinent to orthopedic chest-wall reconstruction. <i>J Biomech</i> . 2007; 40: 1310-7.                                                                          | Non- Human |
| 264 | Mommsen P, Barkhausen T, Frink M, et al. Productive capacity of alveolar macrophages and pulmonary organ damage after femoral fracture and hemorrhage in IL-6 knockout mice. <i>Cytokine</i> . 2011; 53: 60-5.                             | Non- Human |
| 265 | Murata K, Kitaori T, Oishi S, et al. Stromal Cell-Derived Factor 1 Regulates the Actin Organization of Chondrocytes and Chondrocyte Hypertrophy. <i>Plos One</i> . 2012; 7.                                                                | Non- Human |
| 266 | Norrdin RW, Hoopes KJ and O'Toole D. Skeletal changes in hemochromatosis of salers cattle. <i>Veterinary Pathology</i> . 2004; 41: 612-23.                                                                                                 | Non- Human |
| 267 | Perry MJ and Youngson CC. IN-VITRO FRACTURE FIXATION - ADHESIVE SYSTEMS COMPARED WITH A CONVENTIONAL TECHNIQUE. <i>British Journal of Oral &amp; Maxillofacial Surgery</i> . 1995; 33: 224-7.                                              | Non- Human |
| 268 | Perry TG, Mageswaran P, Colbrunn RW, Bonner TF, Francis T and McLain RF. Biomechanical evaluation of a simulated T-9 burst fracture of the thoracic spine with an intact rib cage. <i>Journal of Neurosurgery-Spine</i> . 2014; 21: 481-8. | Non- Human |
| 269 | Pignon C, Vallefuoco R, Krumeich N and Moissonnier P. SURGICAL REPAIR OF A PELVIC FRACTURE IN A FERRET (MLISTELA PLITORILIS FLTRO). <i>Journal of Exotic Pet Medicine</i> . 2014; 23: 96-100.                                              | Non- Human |

|     |                                                                                                                                                                                                                                                                           |            |
|-----|---------------------------------------------------------------------------------------------------------------------------------------------------------------------------------------------------------------------------------------------------------------------------|------------|
| 270 | Puma F, Ragusa M and Daddi G. Chest wall stabilization with synthetic reabsorbable material. <i>The Annals of thoracic surgery</i> . 1992; 53: 408-11.                                                                                                                    | Non- Human |
| 271 | Qi BC, Yu JL, Zhao Y, Zhu D and Yu TC. Mouse fracture models: a primer. <i>International Journal of Clinical and Experimental Medicine</i> . 2016; 9: 12418-29.                                                                                                           | Non- Human |
| 272 | Recknagel S, Bindl R, Brochhausen C, et al. Systemic inflammation induced by a thoracic trauma alters the cellular composition of the early fracture callus. <i>Journal of Trauma and Acute Care Surgery</i> . 2013; 74: 531-7.                                           | Non- Human |
| 273 | Recknagel S, Bindl R, Kurz J, et al. Experimental Blunt Chest Trauma Impairs Fracture Healing in Rats. <i>Journal of Orthopaedic Research</i> . 2011; 29: 734-9.                                                                                                          | Non- Human |
| 274 | Recknagel S, Bindl R, Kurz J, et al. C5aR-antagonist significantly reduces the deleterious effect of a blunt chest trauma on fracture healing. <i>Journal of Orthopaedic Research</i> . 2012; 30: 581-6.                                                                  | Non- Human |
| 275 | Rinnovati R, Romagnoli N, Castagnetti C, Pirrone A, Valentini S and Spadari A. Stabilization of multiple rib fractures with cerclage wire in a colt trotter. <i>Ippologia</i> . 2014; 25: 9-12.                                                                           | Non- Human |
| 276 | Sales JR, Ellis TJ, Gillard J, et al. Biomechanical testing of a novel, minimally invasive rib fracture plating system. <i>Journal of Trauma - Injury, Infection and Critical Care</i> . 2008; 64: 1270-4.                                                                | Non- Human |
| 277 | Schoell SL, Weaver AA, Vavalle NA and Stitzel JD. Age- and Sex-Specific Thorax Finite Element Model Development and Simulation. <i>Traffic Injury Prevention</i> . 2015; 16: S57-S65.                                                                                     | Non- Human |
| 278 | Shaw G, Lessley DJ, Ash JL, et al. Side Impact PMHS Thoracic Response With Large-Volume Air Bag. <i>Traffic Injury Prevention</i> . 2014; 15: 40-7.                                                                                                                       | Non- Human |
| 279 | Shkrum MJ, McClafferty KJ, Green RN, Nowak ES and Young JG. Mechanisms of aortic injury in fatalities occurring in motor vehicle collisions. <i>Journal of Forensic Sciences</i> . 1999; 44: 44-56.                                                                       | Non- Human |
| 280 | Slobogean GP, Kim H, Russell JP, Stockton DJ, Hsieh AH and O'Toole RV. Rib fracture fixation restores inspiratory volume and peak flow in a full thorax human cadaveric breathing model. <i>Archives of Trauma Research</i> . 2015; 4 (4) (no pagination).                | Non- Human |
| 281 | Teixeira P, Puntel V, Martinelli I and Queiroz S. Flail chest: ribs stabilization suture. An original technique. 1997, p.155-7.                                                                                                                                           | Non- Human |
| 282 | Vallefuoco R, Bedu AS, Manassero M, Viateau V, Niebauer G and Moissonnier P. Computed tomographic study of the optimal safe implantation corridors in feline thoraco-lumbar vertebrae. <i>Veterinary and Comparative Orthopaedics and Traumatology</i> . 2013; 26: 372-8. | Non- Human |



|     |                                                                                                                                                                                                                                                              |            |
|-----|--------------------------------------------------------------------------------------------------------------------------------------------------------------------------------------------------------------------------------------------------------------|------------|
| 283 | Vu KC, Skourtis ME, Gong X, Zhou MH, Ozaki W and Winn SR. Reduction of rib fractures with a bioresorbable plating system: Preliminary observations. <i>Journal of Trauma-Injury Infection and Critical Care</i> . 2008; 64: 1264-9.                          | Non- Human |
| 284 | Yoganandan N, Pintar FA, Gennarelli TA, Martin PG and Ridella SA. Chest Deflections and Injuries in Oblique Lateral Impacts. <i>Traffic Injury Prevention</i> . 2008; 9: 162-7.                                                                              | Non- Human |
| 285 | Yu YH, Fan CL, Hsu YH, Chou YC, Ueng SWN and Liu SJ. A Novel Biodegradable Polycaprolactone Fixator for Osteosynthesis Surgery of Rib Fracture: In Vitro and in Vivo Study. <i>Materials</i> . 2015; 8: 7714-22.                                             | Non- Human |
| 286 | Humphries AR and Lube M. Use of porcine dermal allograft to prevent pulmonary herniation in a patient with multiple displaced rib fractures requiring Surgical Fixation. <i>Am Surg</i> . 2015; 81: E109-E10.                                                | Non- Human |
| 287 | Abdolmohammadi S, Hetu PO, Neron A and Blaise G. efficacy of an intrathecal multidrug infusion for pain control in older adults and in end-stage malignancies: a report of three cases. <i>Pain Research &amp; Management</i> . 2015; 20: 118-22.            | Population |
| 288 | Abudou M, Chen X, Kong X and Wu T. Surgical versus non-surgical treatment for thoracolumbar burst fractures without neurological deficit. <i>Cochrane Database Syst Rev</i> . John Wiley & Sons, Ltd, 1996.                                                  | Population |
| 289 | Ahmad RM, Umakanthan R, Lawson M, Leacche M, Solenkova NV and Byrne JG. Nonsurgical management of traumatic cardiac pseudoaneurysms. <i>Journal of Thoracic and Cardiovascular Surgery</i> . 2010; 139: e83-e5.                                              | Population |
| 290 | Ahmed B, Perry M and Shetty S. INTERESTING CASE: Pseudoaneurysm of internal carotid artery after severe maxillofacial injury which caused superior orbital fissure syndrome. <i>British Journal of Oral and Maxillofacial Surgery</i> . 2006; 44: 316.       | Population |
| 291 | Ahmed S, Truong L, Eknayan G and Workeneh B. Evolving spectrum of HIV-associated nephropathy. <i>Nephron - Clinical Practice</i> . 2013; 121: c131-c5.                                                                                                       | Population |
| 292 | Akkas Y, Peri NG, Kocer B and Kaplan T. Repair of lung herniation with titanium prosthetic ribs and Prolene mesh. <i>Asian Cardiovascular and Thoracic Annals</i> . 2016; 24: 280-2.                                                                         | Population |
| 293 | Anavian J, Guthrie ST and Cole PA. Surgical management of multiple painful rib nonunions in patient with a history of severe shoulder girdle trauma: A case report and literature review. <i>J Orthop Trauma</i> . 2009; 23: 600-4.                          | Population |
| 294 | Anderson M, Rose P, Jacofsky DJ, Torchia ME and Dahm DL. Intrathoracic fracture-dislocation of the proximal humerus: A case report and report of a new surgical technique. <i>Journal of Trauma - Injury, Infection and Critical Care</i> . 2007; 63: 920-3. | Population |
| 295 | Andreula C, Marano G and Ettore GC. Spinal alveolar hydatidosis. <i>Rivista Di Neuroradiologia</i> . 2001; 14: 95-101.                                                                                                                                       | Population |
| 296 | Andronic A, Weusten A and Harrison J. Anatomic healing of a humeral shaft fracture despite failure of plate fixation-locking plates                                                                                                                          | Population |

|     |                                                                                                                                                                                                                                                                              |            |
|-----|------------------------------------------------------------------------------------------------------------------------------------------------------------------------------------------------------------------------------------------------------------------------------|------------|
|     | are a good idea. <i>European Orthopaedics and Traumatology</i> . 2015; 6: 471-3.                                                                                                                                                                                             |            |
| 297 | Antoni M, Charles YP, Walter A, Bogorin I and Steib JP. Consolidation of anterior grafts in thoracolumbar fractures. <i>Eur Spine J</i> . 2011; 20 (7): 1198.                                                                                                                | Population |
| 298 | Aoki M, Hatayama Y, Kawaguchi H, et al. Clinical outcome of stereotactic body radiotherapy for primary and oligometastatic lung tumors: a single institutional study with almost uniform dose with different five treatment schedules. <i>Radiation Oncology</i> . 2016; 11. | Population |
| 299 | Bahk MS, Kuhn JE, Galatz LM, Connor PM and Williams Jr GR. Acromioclavicular and sternoclavicular injuries and clavicular, glenoid, and scapular fractures. <i>Journal of Bone and Joint Surgery - Series A</i> . 2009; 91: 2492-510.                                        | Population |
| 300 | Bakowitz M, Bruns B and McCunn M. Acute lung injury and the acute respiratory distress syndrome in the injured patient. <i>Scandinavian Journal of Trauma Resuscitation &amp; Emergency Medicine</i> . 2012; 20.                                                             | Population |
| 301 | Baldwin C and Weekes CE. Dietary advice with or without oral nutritional supplements for disease-related malnutrition in adults. <i>Cochrane Database Syst Rev</i> . John Wiley & Sons, Ltd, 1996.                                                                           | Population |
| 302 | Baljet B. Aspects of the history of osteogenesis imperfecta (Vrolik's syndrome). <i>Annals of Anatomy-Anatomischer Anzeiger</i> . 2002; 184: 1-7.                                                                                                                            | Population |
| 303 | Barrera LM, Perel P, Ker K, Cirocchi R, Farinella E and Morales Uribe CH. Thromboprophylaxis for trauma patients. <i>Cochrane Database Syst Rev</i> . John Wiley & Sons, Ltd, 1996.                                                                                          | Population |
| 304 | Bartolek D, Finci D, Munjiza A, Prkacin I, Cavric G and Ljubicic S. Lepirudin and heparin-induced thrombocytopenia in a trauma patient with acetabulum fracture: A case report. <i>Neurologia Croatica</i> . 2013; 62: 27-31.                                                | Population |
| 305 | Bavare C, Kim M, Blackmon S, Ellsworth W, Davies MG and Reardon MJ. Delayed aortic rupture after aortic endograft placement in patient with spinal hardware. <i>Ann Thorac Surg</i> . 2011; 92: 1512-4.                                                                      | Population |
| 306 | Beaven A, Toman E and Cooper J. Post binder radiography in pelvic trauma. <i>BMJ Case Rep</i> . 2016; 2016 (no pagination).                                                                                                                                                  | Population |
| 307 | Beisse R, Potulski M, Temme C and Buhren V. Endoscopic controlled splitting of the diaphragm. A minimal invasive approach for the treatment of thoraco-lumbar fractures of the spine. <i>Unfallchirurg</i> . 1998; 101: 619-27.                                              | Population |
| 308 | Benli IT, Kaya A, Uruc V and Akalin S. Minimum 5-year follow-up surgical results of post-traumatic thoracic and lumbar kyphosis treated with anterior instrumentation - Comparison of anterior plate and dual rod systems. <i>Spine</i> . 2007; 32: 986-94.                  | Population |
| 309 | Berg EE. The sternal-rib complex: A possible fourth column in thoracic spine fractures. <i>Spine</i> . 1993; 18: 1916-9.                                                                                                                                                     | Population |
| 310 | Berthet JP, Canaud L, Alric P, et al. Reconstruction of the chest wall in case of primary or secondary infection of the operative                                                                                                                                            | Population |

|     |                                                                                                                                                                                                                                                                                    |            |
|-----|------------------------------------------------------------------------------------------------------------------------------------------------------------------------------------------------------------------------------------------------------------------------------------|------------|
|     | site: Is there any interest in the titanium rib osteosynthesis? <i>Interactive Cardiovascular and Thoracic Surgery</i> . 2012; 15: S40.                                                                                                                                            |            |
| 311 | Betts DC and Radue R. The Effects of Positioning the Operative Limb on Tibial and Fibular Nerve Somatosensory Responses during Acetabulum Fracture Repair: A Report of Two Unusual Cases. <i>Neurodiagnostic Journal</i> . 2016; 56: 151-64.                                       | Population |
| 312 | Borens O, Bettschart V, Fischer JF and Mouhsine E. Missed traumatic hernia of the abdominal wall after contralateral pelvic and acetabular fracture. <i>Journal of Trauma - Injury, Infection and Critical Care</i> . 2003; 54: 626.                                               | Population |
| 313 | Brass P, Hellmich M, Ladra A, Ladra J and Wrzosek A. Percutaneous techniques versus surgical techniques for tracheostomy. <i>Cochrane Database Syst Rev</i> . John Wiley & Sons, Ltd, 1996.                                                                                        | Population |
| 314 | Briccoli A, De Paolis M, Campanacci L, et al. Chondrosarcoma of the chest wall: A clinical analysis. <i>Surgery Today</i> . 2002; 32: 291-6.                                                                                                                                       | Population |
| 315 | Buchbinder R, Golmohammadi K, Johnston RV, et al. Percutaneous vertebroplasty for osteoporotic vertebral compression fracture. <i>Cochrane Database Syst Rev</i> . John Wiley & Sons, Ltd, 1996.                                                                                   | Population |
| 316 | Burnham JM, Kim DC and Kamineni S. Midshaft clavicle fractures: A critical review. <i>Orthopedics</i> . 2016; 39: e814-e21.                                                                                                                                                        | Population |
| 317 | Cao J, Dai N and Chen C. Ruptured azygos vein caused by blunt trauma on left chest. <i>Chinese Medical Journal</i> . 2012; 125: 3355-6.                                                                                                                                            | Population |
| 318 | Capo JT, Hastings H, Choung E, Kinchelow T, Rossy W and Steinberg B. Hemicondylar hamate replacement arthroplasty for proximal interphalangeal joint fracture dislocations: An assessment of graft suitability. <i>Journal of Hand Surgery-American Volume</i> . 2008; 33A: 733-9. | Population |
| 319 | Cappell MS. Injury to endoscopic personnel from tripping over exposed cords, wires, and tubing in the endoscopy suite: A preventable cause of potentially severe workplace injury. <i>Digestive Diseases and Sciences</i> . 2010; 55: 947-51.                                      | Population |
| 320 | Carless PA, Henry DA and Anthony DM. Fibrin sealant use for minimising peri-operative allogeneic blood transfusion. <i>Cochrane Database Syst Rev</i> . John Wiley & Sons, Ltd, 1996.                                                                                              | Population |
| 321 | Celik B, Sahin E, Nadir A and Kaptanoglu M. Sternum fractures and effects of associated injuries. <i>Thoracic and Cardiovascular Surgeon</i> . 2009; 57: 468-71.                                                                                                                   | Population |
| 322 | Chapman MW. Role of bone stability in open fractures. <i>Instr Course Lect</i> . 1982; 31: 75-87.                                                                                                                                                                                  | Population |
| 323 | Chen C, Huang XJ, Chen MJ, Yu FL, Yin BL and Yuan YC. Surgical management of a giant sternal chondromyxoid fibroma: a case report. <i>J Cardiothorac Surg</i> . 2015; 10.                                                                                                          | Population |

|     |                                                                                                                                                                                                                                                                |            |
|-----|----------------------------------------------------------------------------------------------------------------------------------------------------------------------------------------------------------------------------------------------------------------|------------|
| 324 | Cheung A, Van Rensburg L and Tytherleigh-Strong GM. Surgical versus conservative interventions for treating fractures of the middle third of the clavicle. <i>Cochrane Database Syst Rev</i> . John Wiley & Sons, Ltd, 1996.                                   | Population |
| 325 | Chin KJ, Cubillos JE and Alakkad H. Single, double or multiple-injection techniques for non-ultrasound guided axillary brachial plexus block in adults undergoing surgery of the lower arm. <i>Cochrane Database Syst Rev</i> . John Wiley & Sons, Ltd, 1996.  | Population |
| 326 | Choi BH, Huh JY, Suh CH and Kim KN. An in vitro evaluation of miniplate fixation techniques for fractures of the atrophic edentulous mandible. <i>International Journal of Oral and Maxillofacial Surgery</i> . 2005; 34: 174-7.                               | Population |
| 327 | Chou SS, Sena MJ and Wong MS. Use of sternalock plating system in acute treatment of unstable traumatic sternal fractures. <i>Ann Thorac Surg</i> . 2011; 91: 597-9.                                                                                           | Population |
| 328 | Cirocchi R, Randolph JJ, Montedori A, et al. Staples versus sutures for surgical wound closure in adults. <i>Cochrane Database Syst Rev</i> . John Wiley & Sons, Ltd, 1996.                                                                                    | Population |
| 329 | Cobanoglu U, Hiz O, Sayir F, Ediz L and Sehitogullari A. Traumatic and atraumatic sternal fractures: Analysis of 13 cases. <i>Turk Toraks Dergisi</i> . 2012; 13: 146-51.                                                                                      | Population |
| 330 | Colaut F, Toniolo L, Sernagiotto C, Pozzobon M and Sartori CA. Thoracotomy for hemotorax in a woman with Parkinson: A case report. <i>Chirurgia</i> . 2006; 19: 379-81.                                                                                        | Population |
| 331 | Crestanello JA, Samuels LE, Kaufman MS, Thomas MP and Talucci R. Sternal fracture with mediastinal hematoma: Delayed cardiopulmonary sequelae. <i>Journal of Trauma - Injury, Infection and Critical Care</i> . 1999; 47: 161-4.                               | Population |
| 332 | Cross MB, Nam D, Van Der Meulen MCH and Bostrom MPG. A rare case of a bisphosphonate-induced peri-prosthetic femoral fracture. <i>Journal of Bone and Joint Surgery - Series B</i> . 2012; 94 B: 994-7.                                                        | Population |
| 333 | Cuschieri J, Kralovich KA, Patton JH, Horst HM, Obeid FN and Karmy-Jones R. Anterior mediastinal abscess after closed sternal fracture. <i>Journal of Trauma - Injury, Infection and Critical Care</i> . 1999; 47: 551-4.                                      | Population |
| 334 | Daniello A and Gabler HC. Characteristics of Injuries in Motorcycle-to-Barrier Collisions in Maryland. <i>Transportation Research Record</i> . 2012: 92-8.                                                                                                     | Population |
| 335 | Darabos N, Gusic N, Vlahovic T, Darabos A, Popovic I and Vlahovic I. Staged management of knee dislocation in polytrauma injured patients. <i>Injury</i> . 2013; 44: S40-S5.                                                                                   | Population |
| 336 | De Lutio Di Castelguidone E, Pinto A, Merola S, Stavolo C and Romano L. Role of spiral and multislice computed tomography in the evaluation of traumatic and spontaneous oesophageal perforation. Our experience. <i>Radiologia Medica</i> . 2005; 109: 252-9. | Population |

|     |                                                                                                                                                                                                                                        |            |
|-----|----------------------------------------------------------------------------------------------------------------------------------------------------------------------------------------------------------------------------------------|------------|
| 337 | De Vloo P, Declerck L, Stevens O and De Vleeschouwer S. A posttraumatic pontomedullary rent with good outcome. <i>Acta Neurochirurgica</i> . 2016; 158: 577-9.                                                                         | Population |
| 338 | Denis F and Burkus JK. LATERAL DISTRACTION INJURIES TO THE THORACIC AND LUMBAR SPINE - A REPORT OF 3 CASES. <i>Journal of Bone and Joint Surgery-American Volume</i> . 1991; 73A: 1049-53.                                             | Population |
| 339 | Dettmer MS, Willi N, Thiesler T, Ochsner P and Cathomas G. Nonthrombotic pulmonary embolism: New insights-a large autopsy study. <i>Laboratory Investigation</i> . 2013; 93: 4A-5A.                                                    | Population |
| 340 | Dimitroulias A, Molinero KG, Krenk DE, Muffly MT, Altman DT and Altman GT. Outcomes of Nonoperatively Treated Displaced Scapular Body Fractures. <i>Clinical Orthopaedics and Related Research</i> . 2011; 469: 1459-65.               | Population |
| 341 | Dirkes S, Dickinson S, Havey R and O'Brien D. Prone positioning: Is it safe and effective? <i>Critical Care Nursing Quarterly</i> . 2012; 35: 64-75.                                                                                   | Population |
| 342 | Dougall N, Maayan N, Soares-Weiser K, McDermott LM and McIntosh A. Transcranial magnetic stimulation (TMS) for schizophrenia. <i>Cochrane Database Syst Rev</i> . John Wiley & Sons, Ltd, 1996.                                        | Population |
| 343 | Ehrnthaller C, Huber-Lang M, Kovtun A, et al. C5aR inhibition in the early inflammatory phase does not affect bone regeneration in a model of uneventful fracture healing. <i>European Journal of Medical Research</i> . 2016; 21.     | Population |
| 344 | Elsayed A, Elgamal E, Elsayed AA, Wasserberg J and Kuncz A. Non-surgical treatment of massive traumatic corpus callosum hematoma after blunt head injury: A case report. <i>Neurologia i Neurochirurgia Polska</i> . 2016; 50: 309-12. | Population |
| 345 | El-Sayed KM. Temporomandibular Joint Reconstruction With Costochondral Graft Using Modified Approach. <i>International Journal of Oral and Maxillofacial Surgery</i> . 2008; 37: 897-902.                                              | Population |
| 346 | Engels PT, Beckett AN, Rubinfeld GD, et al. Physical rehabilitation of the critically ill trauma patient in the ICU. <i>Crit Care Med</i> . 2013; 41: 1790-801.                                                                        | Population |
| 347 | Eren F, Oksuz S, Melikoglu C, Karagoz H and Ulkur E. Saddle-Nose Deformity Repair with Microplate-Adapted Costal Cartilage. <i>Aesthetic Plastic Surgery</i> . 2014; 38: 733-41.                                                       | Population |
| 348 | Escribano MC and Laria PC. Posterolateral extracavitary approach to the spinal column. <i>Neurocirugia</i> . 1996; 7: 119-25.                                                                                                          | Population |
| 349 | Fabio R, Meredith GT, Bendinelli C and Soderlund T. Operative management of flail chest with anatomical locking plates (MatrixRib). <i>ANZ J Surg</i> . 2012; 82: 658-9.                                                               | Population |
| 350 | Farooque K, Khatri K, Dev C, Sharma V and Gupta B. Mechanism of injury and management in traumatic anterior shoulder                                                                                                                   | Population |

|     |                                                                                                                                                                                                                                           |            |
|-----|-------------------------------------------------------------------------------------------------------------------------------------------------------------------------------------------------------------------------------------------|------------|
|     | dislocation with concomitant humeral shaft and ipsilateral scapula fracture: A case report and review of the literature. <i>Journal of Medical Case Reports</i> . 2014; 8 (1) (no pagination).                                            |            |
| 351 | Fatimi SH, Anees A, Muzaffar M and Hanif HM. Acute traumatic subclavian artery thrombosis and its successful repair via resection and end-to-end anastomosis. <i>Chinese Journal of Traumatology - English Edition</i> . 2010; 13: 255-6. | Population |
| 352 | Floyd MW, France JC and Hubbard DF. Early experience with the proximal femoral locking plate. <i>Orthopedics</i> . 2013; 36: e1488-e94.                                                                                                   | Population |
| 353 | Freyrie A, Gasbarrini A, Simoes CE, Gallitto E and Gargiulo M. Delayed presentation of a thoracic aortic injury with a vertebral pedicle screw. <i>Ann Vasc Surg</i> . 2013; 27: 499.e1-3.                                                | Population |
| 354 | Gallo DR, Lett ED and Conner WC. Surgical repair of a chronic traumatic sternal fracture. <i>Ann Thorac Surg</i> . 2006; 81: 726-8.                                                                                                       | Population |
| 355 | Galvagno Jr SM, Sikorski R, Hirshon JM, et al. Helicopter emergency medical services for adults with major trauma. <i>Cochrane Database Syst Rev</i> . John Wiley & Sons, Ltd, 1996.                                                      | Population |
| 356 | Gardet E, Fouilloux V, Guerlin A and Bertin F. Subcutaneous fistula from a pneumatocele: Surgical treatment. <i>Revue Des Maladies Respiratoires</i> . 2010; 27: 1105-8.                                                                  | Population |
| 357 | Garg H, Twerenbold R and Zellweger R. Propeller and jet-ski injuries during Christmas and New Year in Western Australia. <i>Medical Journal of Australia</i> . 2011; 195: 704-5.                                                          | Population |
| 358 | Gelalis ID, Karageorgos A, Arnaoutoglou C, et al. Traumatic pneumorrhachis: Etiology, pathomechanism, diagnosis, and treatment. <i>Spine Journal</i> . 2011; 11: 153-7.                                                                   | Population |
| 359 | George R, Jeba J, Ramkumar G, Chacko AG and Tharyan P. Interventions for the treatment of metastatic extradural spinal cord compression in adults. <i>Cochrane Database Syst Rev</i> . John Wiley & Sons, Ltd, 1996.                      | Population |
| 360 | Geracci JJ and Morey AF. Bladder entrapment after external fixation of traumatic pubic diastasis: Importance of follow-up computed tomography in establishing prompt diagnosis. <i>Military Medicine</i> . 2000; 165: 492-3.              | Population |
| 361 | Geusens PP and Van Den Bergh JP. Osteoporosis and osteoarthritis: Shared mechanisms and epidemiology. <i>Current Opinion in Rheumatology</i> . 2016; 28: 97-103.                                                                          | Population |
| 362 | Giannoudis PV and Schneider E. Principles of fixation of osteoporotic fractures. <i>Journal of Bone and Joint Surgery - Series B</i> . 2006; 88: 1272-8.                                                                                  | Population |
| 363 | Gillespie LD, Robertson MC, Gillespie WJ, et al. Interventions for preventing falls in older people living in the community.                                                                                                              | Population |



|     |                                                                                                                                                                                                                                                                    |            |
|-----|--------------------------------------------------------------------------------------------------------------------------------------------------------------------------------------------------------------------------------------------------------------------|------------|
|     | Cochrane Database Syst Rev. John Wiley & Sons, Ltd, 1996.                                                                                                                                                                                                          |            |
| 364 | Goh MH, Teo LT and Pua U. Pulmonary vein pseudoaneurysm secondary to blunt trauma: A novel management strategy. <i>Ann Thorac Surg.</i> 2016; 101: 1197-200.                                                                                                       | Population |
| 365 | Good WF, Maitz G, King J, Gennari R and Gur D. Observer performance assessment of JPEG-compressed high-resolution chest images. In: Krupinski EA, (ed.). <i>Medical Imaging 1999: Image Perception and Performance.</i> 1999, p. 8-13.                             | Population |
| 366 | Goyal R, Shukla RN, Kumar G and Tandon M. Supraventricular tachycardia after an intercostal nerve block with bupivacaine treated with 10% intralipid. <i>Journal of Anaesthesiology Clinical Pharmacology.</i> 2011; 27: 564-5.                                    | Population |
| 367 | Guay J, Suresh S and Kopp S. The use of ultrasound guidance for perioperative neuraxial and peripheral nerve blocks in children. <i>Cochrane Database Syst Rev.</i> John Wiley & Sons, Ltd, 1996.                                                                  | Population |
| 368 | Guerrissi JO. Treatment Options in Maxillofacial Fractures. <i>Journal of Craniofacial Surgery.</i> 2016; 27: E445-E7.                                                                                                                                             | Population |
| 369 | Gurusamy KS, Koti R, Wilson P and Davidson BR. Antibiotic prophylaxis for the prevention of methicillin-resistant <i>Staphylococcus aureus</i> (MRSA) related complications in surgical patients. <i>Cochrane Database Syst Rev.</i> John Wiley & Sons, Ltd, 1996. | Population |
| 370 | Haddock NT, Weichman KE and Saadeh PB. Reconstruction of a massive thoracic defect: The use of anatomic rib-spanning plates. <i>Journal of Plastic, Reconstructive and Aesthetic Surgery.</i> 2012; 65: e253-e6.                                                   | Population |
| 371 | Hagino H. Other non-vertebral fractures. <i>Best Practice &amp; Research in Clinical Rheumatology.</i> 2013; 27: 731-41.                                                                                                                                           | Population |
| 372 | Hagino T, Ono T and Hamada Y. Unusual double clavicle fracture complicated by ipsilateral scapular neck fracture. <i>Journal of Orthopaedic Science.</i> 2002; 7: 417-9.                                                                                           | Population |
| 373 | Haine SE, Paelinck BP and Vrints CJ. Post-traumatic focal true left ventricular aneurysm. <i>Heart.</i> 2004; 90: 1009.                                                                                                                                            | Population |
| 374 | Hajj-Chahine J, Allain G, Tomasi J, Corbi P and Jayle C. Late postcardiotomy sternal dehiscence: A simple approach using stratos system. <i>Journal of Cardiac Surgery.</i> 2013; 28: 632-4.                                                                       | Population |
| 375 | Hamoud K, Hershkovitz I, Hanani A, Marom L and Abbas J. Internal stabilization of a flexion-distraction injury of the upper cervical spine of a toddler: A new technique and literature review. <i>Spine.</i> 2012; 37: E400-E7.                                   | Population |
| 376 | Handoll HHG and Brorson S. Interventions for treating proximal humeral fractures in adults. <i>Cochrane Database Syst Rev.</i> John Wiley & Sons, Ltd, 1996.                                                                                                       | Population |
| 377 | Handoll HHG, Sherrington C and Mak JCS. Interventions for improving mobility after hip fracture surgery in adults. <i>Cochrane Database Syst Rev.</i> John Wiley & Sons, Ltd, 1996.                                                                                | Population |

|     |                                                                                                                                                                                                                                       |            |
|-----|---------------------------------------------------------------------------------------------------------------------------------------------------------------------------------------------------------------------------------------|------------|
| 378 | Haraguchi S, Hioki M, Hisayoshi T, et al. Resection of sternal tumors and reconstruction of the thorax: A review of 15 patients. <i>Surgery Today</i> . 2006; 36: 225-9.                                                              | Population |
| 379 | Hardt J, Meerpohl JJ, Metzendorf M-I, Kienle P, Post S and Herrle F. Lateral pararectal versus transrectal stoma placement for prevention of parastomal herniation. <i>Cochrane Database Syst Rev</i> . John Wiley & Sons, Ltd, 1996. | Population |
| 380 | Harman BD, Miller NG and Probe RA. Intrathoracic humeral head fracture-dislocation. <i>J Orthop Trauma</i> . 2004; 18: 112-5.                                                                                                         | Population |
| 381 | Hart R, Janecek M, Bucek P and Chaker A. Bilateral clavicular and scapular neck fractures. Case report. <i>Scripta Medica Facultatis Medicae Universitatis Brunensis Masarykianae</i> . 2004; 77: 3-10.                               | Population |
| 382 | Heini PF. Comment on "transpedicle body augments in painful osteoporotic compression fractures" (Kung-Chia Li, Anna F.-Y. Li, Ching-Hsiang Hsieh, Hsiang-Ho Chen). <i>Eur Spine J</i> . 2007; 16: 599-600.                            | Population |
| 383 | Henley MB, Peter RE, Benirschke SK and Ashbaugh D. External fixation of the sternum for thoracic trauma. <i>J Orthop Trauma</i> . 1991; 5: 493-7.                                                                                     | Population |
| 384 | Henry DA, Carless PA, Moxey AJ, et al. Anti-fibrinolytic use for minimising perioperative allogeneic blood transfusion. <i>Cochrane Database Syst Rev</i> . John Wiley & Sons, Ltd, 1996.                                             | Population |
| 385 | Hildebrand F, Giannoudis P, Krettek C and Pape HC. Damage control: extremities. <i>Injury-International Journal of the Care of the Injured</i> . 2004; 35: 678-89.                                                                    | Population |
| 386 | Hirata T, Fukuse T, Mizuno H, Hitomi S and Wada H. Clinical application of biodegradable rib connecting pins in thoracotomy. <i>Thoracic and Cardiovascular Surgeon</i> . 1999; 47: 183-7.                                            | Population |
| 387 | Huang BT. A New Suture Technique Avoids Rib Fractures and Intercostal Nerve Trauma in Thoracotomy. <i>Thoracic and Cardiovascular Surgeon</i> . 2014; 62: 728-9.                                                                      | Population |
| 388 | Huang YP, Tsai FF, Huang CH, Huang HH, Fan SZ and Lin PL. Coronary artery dissection in a patient with traumatic femoral shaft fracture. <i>Acta Anaesthesiologica Taiwanica</i> . 2010; 48: 191-3.                                   | Population |
| 389 | Igai H, Kamiyoshihara M, Nagashima T, Ohtaki Y and Shimizu K. A new application of a wound retractor for chest wall surgery. <i>General Thoracic and Cardiovascular Surgery</i> . 2013; 61: 53-4.                                     | Population |
| 390 | Ishikawa Y, Nakamura T, Kato T, et al. Dosemetric Parameters Predictive of Rib Fractures after Proton Beam Therapy for Early-Stage Lung Cancer. <i>Tohoku Journal of Experimental Medicine</i> . 2016; 238: 339-45.                   | Population |
| 391 | Jahromi AH, Cyrus JW and Youssef AM. Platyabdominalgia: A novel medical terminology describing a symptom. <i>Am Surg</i> . 2013;                                                                                                      | Population |



|     |                                                                                                                                                                                                                                                               |            |
|-----|---------------------------------------------------------------------------------------------------------------------------------------------------------------------------------------------------------------------------------------------------------------|------------|
|     | 79: E40-E2.                                                                                                                                                                                                                                                   |            |
| 392 | Jones GL. Upper extremity stress fractures. <i>Clinics in Sports Medicine</i> . 2006; 25: 159-74.                                                                                                                                                             | Population |
| 393 | Jutte PC and van Loenhout-Rooyackers JH. Routine surgery in addition to chemotherapy for treating spinal tuberculosis. <i>Cochrane Database Syst Rev</i> . John Wiley & Sons, Ltd, 1996.                                                                      | Population |
| 394 | Kakarla UK, Little AS, Chang SW, Sonntag VKH and Theodore N. Placement of percutaneous thoracic pedicle screws using neuronavigation. <i>World Neurosurgery</i> . 2010; 74: 606-10.                                                                           | Population |
| 395 | Kalaaji A, Lilja J, Elander A and Friede H. Tibia as donor site for alveolar bone grafting in patients with cleft lip and palate: Long term experience. <i>Scandinavian Journal of Plastic and Reconstructive Surgery and Hand Surgery</i> . 2001; 35: 35-42. | Population |
| 396 | Karger B, Fracasso T and Pfeiffer H. Fatalities related to medical restraint devices - Asphyxia is a common finding. <i>Forensic Science International</i> . 2008; 178: 178-84.                                                                               | Population |
| 397 | Kaufman JM and Goemaere S. Osteoporosis in men. <i>Best Practice and Research: Clinical Endocrinology and Metabolism</i> . 2008; 22: 787-812.                                                                                                                 | Population |
| 398 | Kayabasoglu G, Nacar A, Yilmaz MS, Altundag A, Cayonu M and Guven M. A Novel Method for Nasal Dorsal Reconstruction: Permanent Fixation Using Kirschner Wire-Guided Hidden Sutures. <i>Journal of Craniofacial Surgery</i> . 2015; 26: 881-4.                 | Population |
| 399 | Kearsley R, Dalton DM, Motherway C and O'Farrell D. Spinal cord infarction as a rare complication of fat embolism syndrome following bilateral intramedullary nailing of femur fractures. <i>Irish Journal of Medical Science</i> . 2016; 1): S135.           | Population |
| 400 | Khanna P, Lee A and Poon MC. Fracture risk in patients with haemophilia. <i>Haemophilia</i> . 2016; 22: e113-e5.                                                                                                                                              | Population |
| 401 | Khodadadyan C, Hoffmann R, Neumann K and Sudkamp NP. Unrecognized pneumothorax as a cause of intraspinal air. <i>Spine</i> . 1995; 20: 838-40.                                                                                                                | Population |
| 402 | Khoriati AA, Rajakulasingam R and Shah R. Sternal fractures and their management. <i>Journal of Emergencies, Trauma and Shock</i> . 2013; 6: 113-6.                                                                                                           | Population |
| 403 | Kilian E, Mair H, Reichart B and Lamm P. Sternal closure after median sternotomy: A new technique using titanium hooks and wires applied parasternally. <i>Interactive Cardiovascular and Thoracic Surgery</i> . 2013; 16: 721-3.                             | Population |
| 404 | Kim W and McKee MD. Management of acute clavicle fractures. <i>Orthop Clin North Am</i> . 2008; 39: 491-505, vii.                                                                                                                                             | Population |
| 405 | Kirmani BH, Jones SG, Chung DA, Williams RJNN and Malaisrie SC. Limited versus full sternotomy for aortic valve replacement. <i>Cochrane Database Syst Rev</i> . John Wiley & Sons, Ltd, 1996.                                                                | Population |

|     |                                                                                                                                                                                                                                        |            |
|-----|----------------------------------------------------------------------------------------------------------------------------------------------------------------------------------------------------------------------------------------|------------|
| 406 | Labbe JL, Peres O, Leclair O, Goulon R, Scemama P and Jourdel F. Fractures of the upper transthoracic cage. <i>Journal of Bone and Joint Surgery - Series B</i> . 2009; 91: 91-6.                                                      | Population |
| 407 | Lamm M, Henriksen SEH and Eiskjoer S. Acute traumatic L5-S1 spondylolisthesis. <i>Journal of Spinal Disorders</i> . 2003; 16: 524-7.                                                                                                   | Population |
| 408 | Langton TJ and Walker JL. Perioperative management of the patient with coronary stents. <i>International Anesthesiology Clinics</i> . 2011; 49: 20-5.                                                                                  | Population |
| 409 | Latalski M, Fatyga M and Gregosiewicz A. Problems and complications in VEPTR-based treatment. <i>Ortopedia, traumatologia, rehabilitacja</i> . 2011; 13: 449-55.                                                                       | Population |
| 410 | Lee SH, Grant R, Kennedy C and Kilbride L. Positioning and spinal bracing for pain relief in metastatic spinal cord compression in adults. <i>Cochrane Database Syst Rev</i> . John Wiley & Sons, Ltd, 1996.                           | Population |
| 411 | Lee YS, Kim BK, Lee HJ and Dan J. Pathologic femoral neck fracture due to fanconi syndrome induced by adefovir dipivoxil therapy for hepatitis B. <i>CiOS Clinics in Orthopedic Surgery</i> . 2016; 8: 232-6.                          | Population |
| 412 | Lenza M, Buchbinder R, Johnston RV, Belloti JC and Faloppa F. Surgical versus conservative interventions for treating fractures of the middle third of the clavicle. <i>Cochrane Database Syst Rev</i> . John Wiley & Sons, Ltd, 1996. | Population |
| 413 | Leonard M, Ibrahim M, McKenna P, Boran S and McCormack D. Paediatric pelvic ring fractures and associated injuries. <i>Injury</i> . 2011; 42: 1027-30.                                                                                 | Population |
| 414 | Leung KS and Lam TP. Open reduction and internal fixation of ipsilateral fractures of the scapular neck and clavicle. <i>Journal of Bone and Joint Surgery - Series A</i> . 1993; 75: 1015-8.                                          | Population |
| 415 | Lewis SR, Butler AR, Brammar A, Nicholson A and Smith AF. Perioperative fluid volume optimization following proximal femoral fracture. <i>Cochrane Database Syst Rev</i> . John Wiley & Sons, Ltd, 1996.                               | Population |
| 416 | Lin HL, Lin JN, Lee WC, Chen CW and Kuo LC. Blunt Abdominal Injury With Isolated Gallbladder Hematoma. <i>Tzu Chi Medical Journal</i> . 2009; 21: 323-6.                                                                               | Population |
| 417 | Lin J, Shen PW and Hou SM. Complications of locked nailing in humeral shaft fractures. <i>Journal of Trauma-Injury Infection and Critical Care</i> . 2003; 54: 943-9.                                                                  | Population |
| 418 | Liporace FA, Yoon RS, Frank MA, Maurer JP and Gaines RJ. Single-Stage Total Hip Arthroplasty and Fracture Fixation for a Both Column Acetabular Fracture in Type i Osteogenesis Imperfecta. <i>Injury</i> . 2011; 42: 1184-7.          | Population |
| 419 | Liu C-j and Latham NK. Progressive resistance strength training for improving physical function in older adults. <i>Cochrane</i>                                                                                                       | Population |

|     |                                                                                                                                                                                                                                                           |            |
|-----|-----------------------------------------------------------------------------------------------------------------------------------------------------------------------------------------------------------------------------------------------------------|------------|
|     | Database Syst Rev. John Wiley & Sons, Ltd, 1996.                                                                                                                                                                                                          |            |
| 420 | Lohse GR and Lee DH. Clavicle fracture with intrathoracic displacement. <i>Orthopedics</i> . 2013; 36: e1099-e102.                                                                                                                                        | Population |
| 421 | Malavolta EA, Assuncao JH, Gracitelli MEC, Lobo FL and Ferreira Neto AA. Fracture of the clavicle and second rib: an indirect injury from tricep dips. <i>Journal of Sports Medicine and Physical Fitness</i> . 2016; 56: 909-12.                         | Population |
| 422 | Marchetti A, Jayachandran A and Guha A. Post-traumatic invasive mucormycosis. <i>Journal of the Intensive Care Society</i> . 2011; 12: 143-4.                                                                                                             | Population |
| 423 | Mauldin FW, Owen K, Hossack JA and Ieee. Specular surface reconstruction from multi-angle interrogation (SRMI) using a piston-array-based transducer for enhanced bone delineation. 2012, p.366-9.                                                        | Population |
| 424 | Mayba, II. Non-union of fractures of the sternum. <i>J Bone Joint Surg Am</i> . 1985; 67: 1091-3.                                                                                                                                                         | Population |
| 425 | Mayberry J. Invited commentary. <i>Ann Thorac Surg</i> . 2014; 98: 489.                                                                                                                                                                                   | Population |
| 426 | Mayes J, Davison E, Panahi P, et al. An anatomical evaluation of the serratus anterior plane block. <i>Anaesthesia</i> . 2016; 71: 1064-9.                                                                                                                | Population |
| 427 | Millo NZ, Plewes C, Rowe BH and Low G. Appropriateness of CT of the chest, abdomen, and pelvis in motorized blunt force trauma patients without signs of significant injury. <i>American Journal of Roentgenology</i> . 2011; 197: 1393-8.                | Population |
| 428 | Milne AC, Potter J, Vivanti A and Avenell A. Protein and energy supplementation in elderly people at risk from malnutrition. <i>Cochrane Database Syst Rev</i> . John Wiley & Sons, Ltd, 1996.                                                            | Population |
| 429 | Miner JR, Rubin J, Clark J and Reardon RF. Retrograde intubation with an extraglottic device in place. <i>Journal of Emergency Medicine</i> . 2015; 49: 864-7.                                                                                            | Population |
| 430 | Mirza A, Litwa J and Appelbe G. Late presenting volar radiocarpal fracture-dislocation. <i>Current Orthopaedic Practice</i> . 2013; 24: 220-4.                                                                                                            | Population |
| 431 | Mischke C, Verbeek JH, Saarto A, Lavoie M-C, Pahwa M and Ijaz S. Gloves, extra gloves or special types of gloves for preventing percutaneous exposure injuries in healthcare personnel. <i>Cochrane Database Syst Rev</i> . John Wiley & Sons, Ltd, 1996. | Population |
| 432 | Mladenovic D, Mladenovic M, Stojiljkovic P, Micic I and Karalejic S. Surgical treatment of dislocated fracture of the scapula column and glenoid: A 22-year follow-up. <i>Vojnosanit Pregl</i> . 2015; 72: 181-4.                                         | Population |
| 433 | Monticone M, Cedraschi C, Ambrosini E, et al. Cognitive-behavioural treatment for subacute and chronic neck pain. <i>Cochrane Database Syst Rev</i> . John Wiley & Sons, Ltd, 1996.                                                                       | Population |

|     |                                                                                                                                                                                                                                                                                                                                       |            |
|-----|---------------------------------------------------------------------------------------------------------------------------------------------------------------------------------------------------------------------------------------------------------------------------------------------------------------------------------------|------------|
| 434 | Morey AF and Geracci JJ. Bladder entrapment after external fixation of traumatic pubic diastasis: Importance of follow-up computed tomography in establishing prompt diagnosis. <i>Military Medicine</i> . 2000; 165: 492-3.                                                                                                          | Population |
| 435 | Mukalel JJ, Modi HC, Altamirano A, Pivalizza EGG and Cattano D. Thromboelastogram with platelet mapping as a marker of assurance for peripheral nerve block and patients on clopidogrel and aspirin. <i>Regional Anesthesia and Pain Medicine Conference: 37th Annual Regional Anesthesia Meeting and Workshops, ASRA</i> . 2012; 37. | Population |
| 436 | Mulawka B, Jacobson AR, Schroder LK and Cole PA. Triple and quadruple disruptions of the superior shoulder suspensory complex. <i>J Orthop Trauma</i> . 2015; 29: 264-70.                                                                                                                                                             | Population |
| 437 | Nallathamby V, Lee H, Lin YY, Lim J, Ong WC and Lim TC. Retained broken implants in the craniomaxillofacial skeleton. <i>Craniomaxillofacial Trauma and Reconstruction</i> . 2014; 7: 154-7.                                                                                                                                          | Population |
| 438 | Nelson A, Ahmed S, Harrow J, Fitzgerald S, Sanchez-Anguiano A and Gavin-Dreschnack D. Fall-related fractures in persons with spinal cord impairment: a descriptive analysis. <i>SCI nursing : a publication of the American Association of Spinal Cord Injury Nurses</i> . 2003; 20: 30-7.                                            | Population |
| 439 | Neunaber C, Oestern S, Andruszkow H, et al. Cytokine productive capacity of alveolar macrophages and Kupffer cells after femoral fracture and blunt chest trauma in a murine trauma model. <i>Immunology Letters</i> . 2013; 152: 159-66.                                                                                             | Population |
| 440 | Ng CY and Watts AC. The use of non-vascularised osteochondral autograft for reconstruction of articular surfaces in the hand and wrist. <i>Journal of Bone and Joint Surgery-British Volume</i> . 2012; 94B: 1448-54.                                                                                                                 | Population |
| 441 | Niemeier T, Leddy L, Bolster M and Chapin R. Insufficiency fracture associated with oncogenic osteomalacia. <i>Journal of Clinical Rheumatology</i> . 2013; 19: 38-42.                                                                                                                                                                | Population |
| 442 | Nisenblat V, Bossuyt PMM, Farquhar C, Johnson N and Hull ML. Imaging modalities for the non-invasive diagnosis of endometriosis. <i>Cochrane Database Syst Rev</i> . John Wiley & Sons, Ltd, 1996.                                                                                                                                    | Population |
| 443 | Nishimura K, Hamasaki T, Ohno T, Nishihara A, Ito H and Ishiguro S. Revascularization for acute blunt popliteal artery injury. <i>Acute Medicine and Surgery</i> . 2016; 3: 276-8.                                                                                                                                                    | Population |
| 444 | Obert L, Lepage D, Sergent P, et al. Post-traumatic malunion of the distal radius treated with autologous costal cartilage graft: A technical note on seven cases. <i>Orthopaedics &amp; Traumatology-Surgery &amp; Research</i> . 2011; 97: 430-7.                                                                                   | Population |
| 445 | Ogawa F, Naito M, Iyoda A and Satoh Y. Report of a rare case: occult hemothorax due to blunt trauma without obvious injury to other organs. <i>J Cardiothorac Surg</i> . 2013; 8.                                                                                                                                                     | Population |

|     |                                                                                                                                                                                                                                                             |            |
|-----|-------------------------------------------------------------------------------------------------------------------------------------------------------------------------------------------------------------------------------------------------------------|------------|
| 446 | Okamoto Y, Murakami H, Demura S, et al. The effect of kyphotic deformity because of vertebral fracture: a finite element analysis of a 10 degrees and 20 degrees wedge-shaped vertebral fracture model. <i>Spine Journal</i> . 2015; 15: 713-20.            | Population |
| 447 | Orrell RW, Copeland S and Rose MR. Scapular fixation in muscular dystrophy. <i>Cochrane Database Syst Rev</i> . John Wiley & Sons, Ltd, 1996.                                                                                                               | Population |
| 448 | Page MJ, Green S, McBain B, et al. Manual therapy and exercise for rotator cuff disease. <i>Cochrane Database Syst Rev</i> . John Wiley & Sons, Ltd, 1996.                                                                                                  | Population |
| 449 | Pai RB, Hegde HV, Srikanth V and Rao PR. Severe unilateral bronchospasm due to inadequate anesthetic depth: A case report and review of literature. <i>Saudi Journal of Anaesthesia</i> . 2012; 6: 186-8.                                                   | Population |
| 450 | Pakula AM, Phillips W and Skinner RA. A case of a traumatic chyle leak following an acute thoracic spine injury: successful resolution with strict dietary manipulation. <i>World Journal of Emergency Surgery</i> . 2011; 6.                               | Population |
| 451 | Pape HC, Giannoudis P and Krettek C. The timing of fracture treatment in polytrauma patients: relevance of damage control orthopedic surgery. <i>Am J Surg</i> . 2002; 183: 622-9.                                                                          | Population |
| 452 | Pape HC, Hildebrand F, Pertschy S, et al. Changes in the management of femoral shaft fractures in polytrauma patients: From early total care to damage control orthopedic surgery. <i>J Orthop Trauma</i> . 2004; 18: S13-S22.                              | Population |
| 453 | Pape HC, Rixen D, Morley J, et al. Impact of the method of initial stabilization for femoral shaft fractures in patients with multiple injuries at risk for complications (borderline patients). <i>Annals of Surgery</i> . 2007; 246: 491-501.             | Population |
| 454 | Pape HC. Immediate fracture fixation - Which method? Comments on the John Border Memorial Lecture, Ottawa, 2005. <i>J Orthop Trauma</i> . 2006; 20: 341-50.                                                                                                 | Population |
| 455 | Park CH, Shon OJ, Seo JS and Kim GB. Midshaft clavicle fracture with ipsilateral acromioclavicular joint separation found during serial follow-up. <i>Journal of Orthopaedic Science</i> . 2016; 21: 399-402.                                               | Population |
| 456 | Pavelescu D, Dumitrascu M, Luca Vasiliu I, Mirea L and Grintescu I. Postoperative, prolonged and refractory cerebral salt wasting syndrome (CSWS) after severe head trauma - What should we do? <i>European Journal of Anaesthesiology</i> . 2013; 30: 199. | Population |
| 457 | Pelias ME, Townsend MC and Flancbaum L. Long bone fractures predispose to pulmonary dysfunction in blunt chest trauma despite early operative fixation. <i>Surgery</i> . 1992; 111: 576-9.                                                                  | Population |
| 458 | Perry CW, Phillips BJ, Matthews MR and Caruso DM. Incidental finding of ascaris in a trauma patient. <i>Journal of Trauma - Injury, Infection and Critical Care</i> . 1999; 47: 611-2.                                                                      | Population |

|     |                                                                                                                                                                                                                                               |            |
|-----|-----------------------------------------------------------------------------------------------------------------------------------------------------------------------------------------------------------------------------------------------|------------|
| 459 | Petscavage JM, Ha AS, Khorashadi L, Perrich K and Chew FS. New and improved orthopedic hardware for the 21st century: Part 2, lower extremity and axial skeleton. <i>American Journal of Roentgenology</i> . 2011; 197: W434-W44.             | Population |
| 460 | Poole P, Chacko EE, Wood-Baker R and Cates CJ. Influenza vaccine for patients with chronic obstructive pulmonary disease. <i>Cochrane Database Syst Rev</i> . John Wiley & Sons, Ltd, 1996.                                                   | Population |
| 461 | Post M. Current concepts in the treatment of fractures of the clavicle. <i>Clinical orthopaedics and related research</i> . 1989: 89-101.                                                                                                     | Population |
| 462 | Powell R, Scott NW, Manyande A, et al. Psychological preparation and postoperative outcomes for adults undergoing surgery under general anaesthesia. <i>Cochrane Database Syst Rev</i> . John Wiley & Sons, Ltd, 1996.                        | Population |
| 463 | Poyanli O, Guven M, Unay K, Akan KH and Esenkaya A. An unusual combination of extremity fractures: Xoating body injury. <i>European Journal of Orthopaedic Surgery and Traumatology</i> . 2010; 20: 323-8.                                    | Population |
| 464 | Pulavarti RS, Symes TH and Rangan A. Surgical interventions for anterior shoulder instability in adults. <i>Cochrane Database Syst Rev</i> . John Wiley & Sons, Ltd, 1996.                                                                    | Population |
| 465 | Quwatli Z, Sivaraman S and Rishi M. Posttraumatic pulmonary pseudocysts (PPP). <i>Chest Conference: CHEST</i> . 2011; 140.                                                                                                                    | Population |
| 466 | Raman J, Onsager D and Straus D. Rib osteotomy and fixation: Enabling technique for better minithoracotomy exposure in cardiac and thoracic procedures. <i>Journal of Thoracic and Cardiovascular Surgery</i> . 2010; 139: 1083-5.            | Population |
| 467 | Raman J. Rigid Plate Fixation Promotes Better Bone Healing After Sternotomy. <i>Seminars in Thoracic and Cardiovascular Surgery</i> . 2012; 24: 147-50.                                                                                       | Population |
| 468 | Rancan M, Esser MP and Kossmann T. Irreducible traumatic obturator hip dislocation with subcapital indentation fracture of the femoral neck: A case report. <i>Journal of Trauma - Injury, Infection and Critical Care</i> . 2007; 62: E4-E6. | Population |
| 469 | Recknagel S, Bindl R, Wehner T, et al. Conversion from external fixator to intramedullary nail causes a second hit and impairs fracture healing in a severe trauma model. <i>Journal of Orthopaedic Research</i> . 2013; 31: 465-71.          | Population |
| 470 | Reichmister J and Jay P. Atypical fractures associated with long-term bisphosphonate use. <i>Clinical Geriatrics</i> . 2012; 20: 17-21.                                                                                                       | Population |
| 471 | Reilly BM, Hart PD, Mascarell S and Chatrath H. Clinical problem-solving. A question well put. <i>N Engl J Med</i> . 2009; 360: 1446-51.                                                                                                      | Population |
| 472 | Rispoli C, Andreuccetti J, Iannone L, Armellino M and Rispoli G. Anorectal avulsion: Management of a rare rectal trauma. <i>International Journal of Surgery Case Reports</i> . 2012; 3: 319-21.                                              | Population |
| 473 | Rolph R, Duffy JMN and Waltham M. Stent graft types for endovascular repair of thoracic aortic aneurysms. <i>Cochrane Database</i>                                                                                                            | Population |



|     |                                                                                                                                                                                                                                                                                                            |            |
|-----|------------------------------------------------------------------------------------------------------------------------------------------------------------------------------------------------------------------------------------------------------------------------------------------------------------|------------|
|     | Syst Rev. John Wiley & Sons, Ltd, 1996.                                                                                                                                                                                                                                                                    |            |
| 474 | Romano L, Giovine S, Guidi G, Tortora G, Cinque T and Romano S. Hepatic trauma: CT findings and considerations based on our experience in emergency diagnostic imaging. <i>European Journal of Radiology</i> . 2004; 50: 59-66.                                                                            | Population |
| 475 | Roncevic R and Stajcic Z. SURGICAL-TREATMENT OF POSTTRAUMATIC ENOPHTHALMOS - A STUDY OF 72 PATIENTS. <i>Annals of Plastic Surgery</i> . 1994; 32: 288-94.                                                                                                                                                  | Population |
| 476 | Rosenfeld HE, Limb R, Chan P, Fitzgerald M, Bradley WPL and Rosenfeld JV. Challenges in the surgical management of spine trauma in the morbidly obese patient: A case series. <i>Journal of Neurosurgery: Spine</i> . 2013; 19: 101-9.                                                                     | Population |
| 477 | Ryan G and Cavallucci D. Traumatic abdominal intercostal hernia without diaphragmatic injury. <i>Trauma</i> . 2011; 13: 364-7.                                                                                                                                                                             | Population |
| 478 | Safranek J. Sternal fractures and their surgical treatment. <i>Acta Chirurgiae Orthopaedicae et Traumatologiae Cechoslovaca</i> . 2015; 82: 76-9.                                                                                                                                                          | Population |
| 479 | Saglam F, Saglam S, Gulabi D, Eceviz E, Elmali N and Yilmaz M. Bilateral clavicle osteomyelitis: A case report. <i>International Journal of Surgery Case Reports</i> . 2014; 5: 932-5.                                                                                                                     | Population |
| 480 | Saleh A, Potemkowski A and Abu-Zidan FM. Endovascular aortic stent graft repair for blunt traumatic thoracic aortic transection. <i>Singapore Medical Journal</i> . 2008; 49: 847-8.                                                                                                                       | Population |
| 481 | Samartzis D, Shen FH, Khanna N, Fairbank J and An H. Local anesthetic at the iliac crest donor-site for postoperative pain management in spine surgery patients. <i>Cochrane Database Syst Rev</i> . John Wiley & Sons, Ltd, 1996.                                                                         | Population |
| 482 | Saratzis NA, Saratzis AN, Melas N, et al. Endovascular repair of traumatic rupture of the thoracic aorta: Single-center experience. <i>Cardiovascular and Interventional Radiology</i> . 2007; 30: 370-5.                                                                                                  | Population |
| 483 | Schlechta B, Wiedemann D, Eppel W and Kocher A. Uncomplicated vaginal delivery 6 years after stent graft repair of an acute traumatic aortic transection. <i>Interactive Cardiovascular and Thoracic Surgery</i> . 2012; 14: 120-1.                                                                        | Population |
| 484 | Schochl H, Posch A, Hanke A, Voelckel W and Solomon C. High-dose fibrinogen concentrate for haemostatic therapy of a major trauma patient with recent clopidogrel and aspirin intake. <i>Scandinavian Journal of Clinical and Laboratory Investigation</i> . 2010; 70: 453-7.                              | Population |
| 485 | Schulz-Drost S, Syed J, Besendoerfer M and Carbon RT. Sternocostal Dislocation Following Open Correction of Pectus Excavatum-"Stairway Phenomenon": Complication Management by Means of Sternocostal Locking Titanium Plate Osteosynthesis. <i>Thoracic and Cardiovascular Surgeon</i> . 2014; 62: 245-52. | Population |



|     |                                                                                                                                                                                                                                                                                                 |            |
|-----|-------------------------------------------------------------------------------------------------------------------------------------------------------------------------------------------------------------------------------------------------------------------------------------------------|------------|
| 486 | Schwagten V, Beaucourt L and Van Schil P. Traumatic manubriosternal joint disruption: Case report. <i>Journal of Trauma</i> . 1994; 36: 747-8.                                                                                                                                                  | Population |
| 487 | Schwarz N and Hocker K. OSTEOSYNTHESIS OF IRREDUCIBLE FRACTURES OF THE CLAVICLE WITH 2.7-MM ASIF PLATES. <i>Journal of Trauma-Injury Infection and Critical Care</i> . 1992; 33: 179-83.                                                                                                        | Population |
| 488 | Seder CW, Allen MS, Nichols FC, et al. Primary and Prosthetic Repair of Acquired Chest Wall Hernias: A 20-Year Experience. <i>Ann Thorac Surg</i> . 2014; 98: 484-9.                                                                                                                            | Population |
| 489 | Severson EP, Thompson CA, Resig SG and Swiontkowski MF. Transverse sternal nonunion, repair and revision: A case report and review of the literature. <i>Journal of Trauma - Injury, Infection and Critical Care</i> . 2009; 66: 1485-8.                                                        | Population |
| 490 | Shahar R, Shamir M and Johnston DE. A technique for management of bite wounds of the thoracic wall in small dogs. <i>Veterinary Surgery</i> . 1997; 26: 45-50.                                                                                                                                  | Population |
| 491 | Shapiro S, Abel T and Rodgers RB. Traumatic thoracic spinal fracture dislocation with minimal or no cord injury: Report of four cases and review of the literature. <i>Journal of Neurosurgery</i> . 2002; 96: 333-7.                                                                           | Population |
| 492 | Sharma R and Tam RK. Migrating foreign body in mediastinum--intravascular Steinman pin. <i>Interact Cardiovasc Thorac Surg</i> . 2011; 12: 883-4.                                                                                                                                               | Population |
| 493 | Shimizu J, Murata S, Arano Y, Kamesui T, Moriya M and Hayashi S. Partial sternal resection for metastasis to the sternal body and reconstruction with titanium plates: Report of two cases. <i>Chirurgia (Turin)</i> . 2015; 28: 89-93.                                                         | Population |
| 494 | Shirley PJ. Trauma and critical care III: Chest trauma. <i>Trauma</i> . 2005; 7: 133-42.                                                                                                                                                                                                        | Population |
| 495 | Sia WT, Xu GG, Puhaindran ME, Tan BK, Cheng MHW and Chew WYC. Reconstruction of Extensive Soft-Tissue Defects with Concomitant Bone Defects in the Lower Extremity with the Latissimus Dorsi-Serratus Anterior-Rib Free Flap. <i>Journal of Reconstructive Microsurgery</i> . 2015; 31: 407-13. | Population |
| 496 | Sikes JW, Jr., Smith BR and Mukherjee DP. An in vitro study of the effect of bony buttressing on fixation strength of a fractured atrophic edentulous mandible model. <i>J Oral Maxillofac Surg</i> . 2000; 58: 56-61; discussion 2.                                                            | Population |
| 497 | Sikes JW, Smith BR, Mukherjee DP and Coward KA. Comparison of fixation strengths of locking head and conventional screws, in fracture and reconstruction models. <i>Journal of Oral and Maxillofacial Surgery</i> . 1998; 56: 468-73.                                                           | Population |
| 498 | Starr AJ and Tolo VT. Timing of femoral fracture stabilization [2] (multiple letters). <i>Journal of Bone and Joint Surgery - Series A</i> . 2001; 83: 293-4.                                                                                                                                   | Population |

|     |                                                                                                                                                                                                                                                        |            |
|-----|--------------------------------------------------------------------------------------------------------------------------------------------------------------------------------------------------------------------------------------------------------|------------|
| 499 | Stawicki SP, Seamon MJ, Carvalho CM, et al. Adrenal gland injury secondary to blunt traumatic mechanisms: A marker of overall injury severity. <i>Endokrynologia Polska</i> . 2009; 60: 2-8.                                                           | Population |
| 500 | Stefani A, Nesci J and Morandi U. STRATOS <sup>TM</sup> system for the repair of pectus excavatum. <i>Interactive Cardiovascular and Thoracic Surgery</i> . 2013; 17: 1056-8.                                                                          | Population |
| 501 | Sugimoto Y, Ito Y, Shimokawa T, Shiozaki Y and Mazaki T. Percutaneous screw fixation for traumatic spondylolisthesis of the axis using iso-c3d fluoroscopy-assisted navigation (Case Report). <i>Minimally Invasive Neurosurgery</i> . 2010; 53: 83-5. | Population |
| 502 | Taggard DA and Traynelis VC. Management of cervical spinal fractures in ankylosing spondylitis with posterior fixation. <i>Spine</i> . 2000; 25: 2035-8.                                                                                               | Population |
| 503 | Taitsman LA, Nork SE, Coles CP, Barei DP and Agel J. Open clavicle fractures and associated injuries. <i>J Orthop Trauma</i> . 2006; 20: 396-9.                                                                                                        | Population |
| 504 | Takarada T, Hojo H, Iemata M, et al. Interference by adrenaline with chondrogenic differentiation through suppression of gene transactivation mediated by Sox9 family members. <i>Bone</i> . 2009; 45: 568-78.                                         | Population |
| 505 | Tanner J and Parkinson H. Double gloving to reduce surgical cross-infection. <i>Cochrane Database Syst Rev</i> . John Wiley & Sons, Ltd, 1996.                                                                                                         | Population |
| 506 | Tatsumi A, Kanemitsu N, Nakamura T and Shimizu Y. Bioabsorbable poly-L-lactide costal coaptation pins and their clinical application in thoracotomy. <i>Ann Thorac Surg</i> . 1999; 67: 765-8.                                                         | Population |
| 507 | Thomas BW, Maxwell RA, Dyer A, Dart BW and Smith PW. Unusual sequelae of blunt liver injury: Laparoscopic resection of a liver abscess and stent failure of an ischemic common bile duct stricture. <i>Am Surg</i> . 2010; 76: E69-E70.                | Population |
| 508 | Ugur HC, Attar A, Uz A, Tekdemir I, Egemen N and Genc Y. Thoracic pedicle: Surgical anatomic evaluation and relations. <i>Journal of Spinal Disorders</i> . 2001; 14: 39-45.                                                                           | Population |
| 509 | Vaishya R, Agarwal AK, Gupta N and Vijay V. Bilateral segmental pelvic and femoral fractures in a young female: A rare case report. <i>Chinese Journal of Traumatology - English Edition</i> . 2016; 19: 286-9.                                        | Population |
| 510 | Vialle LR and Vialle E. Thoracic spine fractures. <i>Injury-International Journal of the Care of the Injured</i> . 2005; 36: 65-72.                                                                                                                    | Population |
| 511 | Vincent KB, Block EFJ and Black J. Traumatic injuries associated with segways and personal transporters. <i>Am Surg</i> . 2009; 75: 722-4.                                                                                                             | Population |
| 512 | Wada S, Kasai F and Mizuma M. Rehabilitation of ipsilateral dislocation fracture of the hip and transfemoral amputation: A case                                                                                                                        | Population |

|     |                                                                                                                                                                                                                                                                                                             |            |
|-----|-------------------------------------------------------------------------------------------------------------------------------------------------------------------------------------------------------------------------------------------------------------------------------------------------------------|------------|
|     | report. PM and R. 2010; 1): S93.                                                                                                                                                                                                                                                                            |            |
| 513 | Walz M, Kolbow B and Auerbach F. Elastic, stable intramedullary nailing in midclavicular fractures - a change in treatment strategies? Unfallchirurg. 2006; 109: 200-+.                                                                                                                                     | Population |
| 514 | Wang SC, Chen CI, Liu CC, Wang CY, Chun-Jen Chen I and Huang MS. Hepatic hydrothorax after blunt chest trauma. Journal of the Chinese Medical Association. 2012; 75: 413-5.                                                                                                                                 | Population |
| 515 | Weddle G, Gandy K, Bratcher D, Pahud B and Jackson MA. Apophysomyces trapeziformis infection associated with a tornado-related injury. Pediatric Infectious Disease Journal. 2012; 31: 640-2.                                                                                                               | Population |
| 516 | Weinberg DS, Napora JK, West WH, Grimberg DC and Vallier HA. Factors associated with narcotic use after clavicle fractures. Orthopedics. 2016; 39: e917-e23.                                                                                                                                                | Population |
| 517 | Westby MD, Kennedy D, Jones D, Jones A, Doyle-Waters MM and Backman C. Post-acute physiotherapy for primary total knee arthroplasty. Cochrane Database Syst Rev. John Wiley & Sons, Ltd, 1996.                                                                                                              | Population |
| 518 | Wiesler ER, Smith AM and Shilt JS. Humeral head fracture-dislocation into the thoracic outlet: case report and review of the literature. J Shoulder Elbow Surg. 2004; 13: 576-9.                                                                                                                            | Population |
| 519 | Wirth MA, Jensen KL, Agarwal A, Curtis RJ and Rockwood Jr CA. Fracture-dislocation of the proximal part of the humerus with retroperitoneal displacement of the humeral head: A case report. Journal of Bone and Joint Surgery - Series A. 1997; 79: 763-6.                                                 | Population |
| 520 | Wong MK, Low MH and Yong R. The femur: A good alternative source of bone graft using a new reamer system when options run out. Singapore Medical Journal. 2013; 54: e38-e42.                                                                                                                                | Population |
| 521 | Wright DEP and Johnstone AJ. The floating shoulder redefined. Journal of Trauma - Injury, Infection and Critical Care. 2010; 68: E26-E9.                                                                                                                                                                    | Population |
| 522 | Wu YS, Lin Y, Zhang XL, et al. Management of hangman's fracture with percutaneous transpedicular screw fixation. Eur Spine J. 2013; 22: 79-86.                                                                                                                                                              | Population |
| 523 | Yalcin M and Aytakin I. An unusual complication: aortic graft perforation by a fractured rib after type B aortic dissection. Interactive Cardiovascular and Thoracic Surgery. 2016; 23: 338-9.                                                                                                              | Population |
| 524 | Yamazaki M, Okawa A, Furuya T, et al. Anomalous Vertebral Arteries in the Extra- and Intraosseous Regions of the Craniovertebral Junction Visualized by 3-Dimensional Computed Tomographic Angiography Analysis of 100 Consecutive Surgical Cases and Review of the Literature. Spine. 2012; 37: E1389-E97. | Population |

|     |                                                                                                                                                                                                                                                        |            |
|-----|--------------------------------------------------------------------------------------------------------------------------------------------------------------------------------------------------------------------------------------------------------|------------|
| 525 | Yu YH, Hsu YH, Chou YC, et al. Sustained relief of pain from osteosynthesis surgery of rib fracture by using biodegradable lidocaine-eluting nanofibrous membranes. <i>Nanomedicine: Nanotechnology, Biology, and Medicine</i> . 2016; 12: 1785-93.    | Population |
| 526 | Zaidenberg EE, Rossi LA, Bongiovanni SL, Tanoira I, Maignon G and Ranalletta M. Snapping scapular syndrome secondary to rib intramedullary fixation device. <i>International Journal of Surgery Case Reports</i> . 2015; 17: 158-60.                   | Population |
| 527 | Zanette G, Micaglio M, Behr AU, Manani G and Facco E. Multiple regional anaesthesia techniques in a high risk surgical patient. [Italian, English]. <i>Acta Anaesthesiologica Italica / Anaesthesia and Intensive Care in Italy</i> . 2008; 59: 174-9. | Population |
| 528 | Zhang H, Zhao Q, He B, Liu J, Hao D and Guo H. Optimal timing for type C3 thoracic fractures with posterior surgical approach: a retrospective cohort study. <i>Journal of Orthopaedic Science</i> . 2015; 20: 689-94.                                 | Population |
| 529 | Zong ZW, Bao QW, Liu HY, et al. Diagnosis and treatment of rare complications of pelvic fractures. <i>Chinese Journal of Traumatology - English Edition</i> . 2016; 19: 199-205.                                                                       | Population |
| 530 | Jiang B, Zhu R, Cao Q and Pan H. Severe thoracic spinal fracture-dislocation without neurological symptoms and costal fractures: A case report and review of the literature. <i>Journal of Medical Case Reports</i> . 2014; 8 (1) (no pagination).     | Population |
| 531 | Manzano JL, Bolanos J, Lubillo S, Romero F and Jato N. Internal costal fixation of fractured ribs in a 6-year-old patient. <i>Crit Care Med</i> . 1982; 10: 67-8.                                                                                      | Population |
| 532 | Pierce MC, Kaczor K, Lohr D, Richter K and Starling SP. A Practical Guide to Differentiating Abusive From Accidental Fractures: An Injury Plausibility Approach. <i>Clinical Pediatric Emergency Medicine</i> . 2012; 13: 166-77.                      | Population |
| 533 | Sartorelli KH and Vane DW. The Diagnosis and Management of Children with Blunt Injury of the Chest. <i>Seminars in Pediatric Surgery</i> . 2004; 13: 98-105.                                                                                           | Population |
| 534 | Yasuda R, Okada H, Shirai K, et al. Comparison of two pediatric flail chest cases. <i>Scandinavian Journal of Trauma Resuscitation &amp; Emergency Medicine</i> . 2015; 23.                                                                            | Population |
| 535 | Matshes EW and Lew EO. Do Resuscitation-Related Injuries Kill Infants and Children? <i>American Journal of Forensic Medicine and Pathology</i> . 2010; 31: 178-85.                                                                                     | Population |
| 536 | Gauger EM, Hill BW, Lafferty PM and Cole PA. Outcomes after operative management of symptomatic rib nonunion. <i>J Orthop Trauma</i> . 2015; 29: 283-9.                                                                                                | Population |
| 537 | Fabricant L, Ham B, Mullins R and Mayberry J. Prospective clinical trial of surgical intervention for painful rib fracture nonunion. <i>Am Surg</i> . 2014; 80: 580-6.                                                                                 | Population |

|     |                                                                                                                                                                                                                                                |                   |
|-----|------------------------------------------------------------------------------------------------------------------------------------------------------------------------------------------------------------------------------------------------|-------------------|
| 538 | Ahmed Z. On internal fixation for flail chest - Reply. <i>Journal of Thoracic and Cardiovascular Surgery</i> . 1996; 112: 850-.                                                                                                                | Publication Type  |
| 539 | Doben AR and Pieracci FM. Reply to "open reduction and internal fixation of rib fractures in polytrauma patients with flail chest" by DeFreest et al. <i>American Journal of Surgery</i> . 2016.                                               | Publication Type  |
| 540 | Fabian TC, Hawkins M, Bland K, et al. Discussion. <i>Am Surg</i> . 2007; 73: 596-7.                                                                                                                                                            | Publication Type  |
| 541 | Haasler GB. Use of 3.5-mm acetabular reconstruction plates for internal fixation of flail chest injuries - Invited commentary. <i>Ann Thorac Surg</i> . 1998; 65: 1474-.                                                                       | Publication Type  |
| 542 | Hajj-Chahine J, Jayle C, Houmaida H and Corbi P. eComment. Titanium devices in children. <i>Interact Cardiovasc Thorac Surg</i> . 2012; 15: 595.                                                                                               | Publication Type  |
| 543 | Mayberry J. Invited Commentary: Early Stabilization of Flail Chest With Locked Plate Fixation. <i>J Orthop Trauma</i> . 2011; 25: 648-.                                                                                                        | Publication Type  |
| 544 | Mayberry J and Ham B. Editorial comment. <i>Journal of Trauma - Injury, Infection and Critical Care</i> . 2011; 71: 1552.                                                                                                                      | Publication Type  |
| 545 | Mayberry JC. Editorial comment. <i>Journal of Trauma - Injury, Infection and Critical Care</i> . 2009; 67: 13.                                                                                                                                 | Publication Type  |
| 546 | Oyarzun JR, Bush AP, McCormick JR and Bolanowski PJP. Reconstruction plates for internal fixation of flail chest - Reply. <i>Ann Thorac Surg</i> . 1998; 66: 2158-.                                                                            | Publication Type  |
| 547 | Bastos R, Calhoon JH and Baisden CE. Flail Chest and Pulmonary Contusion. <i>Seminars in Thoracic and Cardiovascular Surgery</i> . 2008; 20: 39-45.                                                                                            | Literature Review |
| 548 | Bemelman M, Poeze M, Blokhuis TJ and Leenen LPH. Historic overview of treatment techniques for rib fractures and flail chest. <i>European Journal of Trauma and Emergency Surgery</i> . 2010; 36: 407-15.                                      | Literature Review |
| 549 | Fitzpatrick DC, Denard PJ, Phelan D, Long WB, Madey SM and Bottlang M. Operative stabilization of flail chest injuries: review of literature and fixation options. <i>European Journal of Trauma and Emergency Surgery</i> . 2010; 36: 427-33. | Literature Review |
| 550 | Forward DP, Ollivere BJ, Ng JWG, Coughlin TA and Rollins KE. Current concepts in rib fracture fixation. <i>Bone &amp; Joint</i> 360. 2016; 5: 2-7.                                                                                             | Literature Review |

|     |                                                                                                                                                                                    |                   |
|-----|------------------------------------------------------------------------------------------------------------------------------------------------------------------------------------|-------------------|
| 551 | Fowler TT, Taylor BC, Bellino MJ and Althausen PL. Surgical Treatment of Flail Chest and Rib Fractures. Journal of the American Academy of Orthopaedic Surgeons. 2014; 22: 751-60. | Literature Review |
| 552 | Gasparri MG, Tisol WB and Haasler GB. Rib stabilization: lessons learned. European Journal of Trauma and Emergency Surgery. 2010; 36: 435-40.                                      | Literature Review |
| 553 | Kiraly L and Schreiber M. Management of the crushed chest. Crit Care Med. 2010; 38: S469-S77.                                                                                      | Literature Review |
| 554 | Lafferty PM, Anavian J, Will RE and Cole PA. Operative treatment of chest wall injuries: indications, technique, and outcomes. J Bone Joint Surg Am. 2011; 93: 97-110.             | Literature Review |
| 555 | Marasco S and Saxena P. Surgical rib fixation - Technical aspects. Injury. 2015; 46: 929-32.                                                                                       | Literature Review |
| 556 | Mayberry JC and Trunkey DD. The fractured rib in chest wall trauma. Chest Surgery Clinics of North America. 1997; 7: 239-61.                                                       | Literature Review |
| 557 | Nirula R, Diaz Jr JJ, Trunkey DD and Mayberry JC. Rib fracture repair: Indications, technical issues, and future directions. World J Surg. 2009; 33: 14-22.                        | Literature Review |
| 558 | Nirula R and Mayberry JC. Rib fracture fixation: Controversies and technical challenges. Am Surg. 2010; 76: 793-802.                                                               | Literature Review |
| 559 | Parry NG, Moffat B and Vogt K. Blunt thoracic trauma: recent advances and outstanding questions. Current Opinion in Critical Care. 2015; 21: 544-8.                                | Literature Review |
| 560 | Pettiford BL, Luketich JD and Landreneau RJ. The Management of Flail Chest. Thorac Surg Clin. 2007; 17: 25-33.                                                                     | Literature Review |
| 561 | Pharaon KS, Marasco S and Mayberry J. Rib Fractures, Flail Chest, and Pulmonary Contusion. Current Trauma Reports. 2015; 1: 237-42.                                                | Literature Review |
| 562 | Qasim Z and Gwinnutt C. Flail chest: Pathophysiology and management. Trauma. 2009; 11: 63-70.                                                                                      | Literature Review |
| 563 | Ranasinghe AM, Hyde JAJ and Graham TR. Management of flail chest. Trauma. 2001; 3: 235-47.                                                                                         | Literature Review |

|     |                                                                                                                                                                                                                                      |                   |
|-----|--------------------------------------------------------------------------------------------------------------------------------------------------------------------------------------------------------------------------------------|-------------------|
| 564 | Senekjian L and Nirula R. Rib Fracture Fixation: Indications and Outcomes. Critical Care Clinics. 2017; 33: 153-65.                                                                                                                  | Literature Review |
| 565 | Simon B, Ebert J, Bokhari F, et al. Management of pulmonary contusion and flail chest: An Eastern Association for the Surgery of Trauma practice management guideline. Journal of Trauma and Acute Care Surgery. 2012; 73: S351-S61. | Literature Review |
| 566 | Sirmali M, Turut H, Topcu S, et al. A comprehensive analysis of traumatic rib fractures: morbidity, mortality and management. Eur J Cardiothorac Surg. 2003; 24: 133-8.                                                              | Literature Review |
| 567 | Zreik NH, Francis MI, Ray A, Rogers BA and Ricketts DM. Blunt chest trauma: bony injury in the thorax. British Journal of Hospital Medicine. 2016; 77: 72-7.                                                                         | Literature Review |



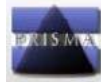

# PRISMA 2009 Checklist

1  
2  
3  
4  
5  
6  
7  
8  
9  
10  
11  
12  
13  
14  
15  
16  
17  
18  
19  
20  
21  
22  
23  
24  
25  
26  
27  
28  
29  
30  
31  
32  
33  
34  
35  
36  
37  
38  
39  
40  
41  
42  
43  
44  
45  
46  
47

| Section/topic                      | #  | Checklist item                                                                                                                                                                                                                                                                                              | Reported on page # |
|------------------------------------|----|-------------------------------------------------------------------------------------------------------------------------------------------------------------------------------------------------------------------------------------------------------------------------------------------------------------|--------------------|
| <b>TITLE</b>                       |    |                                                                                                                                                                                                                                                                                                             |                    |
| Title                              | 1  | Identify the report as a systematic review, meta-analysis, or both.                                                                                                                                                                                                                                         | 1                  |
| <b>ABSTRACT</b>                    |    |                                                                                                                                                                                                                                                                                                             |                    |
| Structured summary                 | 2  | Provide a structured summary including, as applicable: background; objectives; data sources; study eligibility criteria, participants, and interventions; study appraisal and synthesis methods; results; limitations; conclusions and implications of key findings; systematic review registration number. | 2                  |
| <b>INTRODUCTION</b>                |    |                                                                                                                                                                                                                                                                                                             |                    |
| Rationale                          | 3  | Describe the rationale for the review in the context of what is already known.                                                                                                                                                                                                                              | 3                  |
| Objectives                         | 4  | Provide an explicit statement of questions being addressed with reference to participants, interventions, comparisons, outcomes, and study design (PICOS).                                                                                                                                                  | 3                  |
| <b>METHODS</b>                     |    |                                                                                                                                                                                                                                                                                                             |                    |
| Protocol and registration          | 5  | Indicate if a review protocol exists, if and where it can be accessed (e.g., Web address), and, if available, provide registration information including registration number.                                                                                                                               | 3                  |
| Eligibility criteria               | 6  | Specify study characteristics (e.g., PICOS, length of follow-up) and report characteristics (e.g., years considered, language, publication status) used as criteria for eligibility, giving rationale.                                                                                                      | 4                  |
| Information sources                | 7  | Describe all information sources (e.g., databases with dates of coverage, contact with study authors to identify additional studies) in the search and date last searched.                                                                                                                                  | 4-5                |
| Search                             | 8  | Present full electronic search strategy for at least one database, including any limits used, such that it could be repeated.                                                                                                                                                                               | S1                 |
| Study selection                    | 9  | State the process for selecting studies (i.e., screening, eligibility, included in systematic review, and, if applicable, included in the meta-analysis).                                                                                                                                                   | 5                  |
| Data collection process            | 10 | Describe method of data extraction from reports (e.g., piloted forms, independently, in duplicate) and any processes for obtaining and confirming data from investigators.                                                                                                                                  | 5-6                |
| Data items                         | 11 | List and define all variables for which data were sought (e.g., PICOS, funding sources) and any assumptions and simplifications made.                                                                                                                                                                       | 5                  |
| Risk of bias in individual studies | 12 | Describe methods used for assessing risk of bias of individual studies (including specification of whether this was done at the study or outcome level), and how this information is to be used in any data synthesis.                                                                                      | 6                  |
| Summary measures                   | 13 | State the principal summary measures (e.g., risk ratio, difference in means).                                                                                                                                                                                                                               | 5                  |
| Synthesis of results               | 14 | Describe the methods of handling data and combining results of studies, if done, including measures of consistency (e.g., $I^2$ ) for each meta-analysis.                                                                                                                                                   | 6                  |

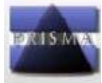

# PRISMA 2009 Checklist

| Section/topic                 | #  | Checklist item                                                                                                                                                                                           | Reported on page # |
|-------------------------------|----|----------------------------------------------------------------------------------------------------------------------------------------------------------------------------------------------------------|--------------------|
| Risk of bias across studies   | 15 | Specify any assessment of risk of bias that may affect the cumulative evidence (e.g., publication bias, selective reporting within studies).                                                             | 6                  |
| Additional analyses           | 16 | Describe methods of additional analyses (e.g., sensitivity or subgroup analyses, meta-regression), if done, indicating which were pre-specified.                                                         | N/A                |
| <b>RESULTS</b>                |    |                                                                                                                                                                                                          |                    |
| Study selection               | 17 | Give numbers of studies screened, assessed for eligibility, and included in the review, with reasons for exclusions at each stage, ideally with a flow diagram.                                          | 7                  |
| Study characteristics         | 18 | For each study, present characteristics for which data were extracted (e.g., study size, PICOS, follow-up period) and provide the citations.                                                             | 8-13               |
| Risk of bias within studies   | 19 | Present data on risk of bias of each study and, if available, any outcome level assessment (see item 12).                                                                                                | 16-17              |
| Results of individual studies | 20 | For all outcomes considered (benefits or harms), present, for each study: (a) simple summary data for each intervention group (b) effect estimates and confidence intervals, ideally with a forest plot. | 17-18, 24-25, 27   |
| Synthesis of results          | 21 | Present results of each meta-analysis done, including confidence intervals and measures of consistency.                                                                                                  | 17-33              |
| Risk of bias across studies   | 22 | Present results of any assessment of risk of bias across studies (see Item 15).                                                                                                                          | 14-16              |
| Additional analysis           | 23 | Give results of additional analyses, if done (e.g., sensitivity or subgroup analyses, meta-regression [see Item 16]).                                                                                    | N/A                |
| <b>DISCUSSION</b>             |    |                                                                                                                                                                                                          |                    |
| Summary of evidence           | 24 | Summarize the main findings including the strength of evidence for each main outcome; consider their relevance to key groups (e.g., healthcare providers, users, and policy makers).                     | 33-34              |
| Limitations                   | 25 | Discuss limitations at study and outcome level (e.g., risk of bias), and at review-level (e.g., incomplete retrieval of identified research, reporting bias).                                            | 36                 |
| Conclusions                   | 26 | Provide a general interpretation of the results in the context of other evidence, and implications for future research.                                                                                  | 37                 |
| <b>FUNDING</b>                |    |                                                                                                                                                                                                          |                    |
| Funding                       | 27 | Describe sources of funding for the systematic review and other support (e.g., supply of data); role of funders for the systematic review.                                                               | 37                 |

From: Moher D, Liberati A, Tetzlaff J, Altman DG, The PRISMA Group (2009). Preferred Reporting Items for Systematic Reviews and Meta-Analyses: The PRISMA Statement. PLoS Med 6(7): e1000097. doi:10.1371/journal.pmed1000097

For more information, visit: [www.prisma-statement.org](http://www.prisma-statement.org).
