# Supplementary material for: Systematic review of systematic reviews for effectiveness of internal fixation for flail chest and rib fractures in adults
Source: PubMed Central journal article supplement — BMJ Open. 2019 Apr 1;9(4):e023444. doi: 10.1136/bmjopen-2018-023444 (PMC6500198; doi:10.1136/bmjopen-2018-023444), 2019-04-01
Supplement: bmjopen-2018-023444supp002.pdf [file bmjopen-2018-023444supp002.pdf]

## Additional content 2 Excluded studies with reasons given for exclusion

|    |                                                                                                                                                                                                                                                              |              |
|----|--------------------------------------------------------------------------------------------------------------------------------------------------------------------------------------------------------------------------------------------------------------|--------------|
| 1  | Galan G, Penalver JC, Paris F, et al. BLUNT CHEST INJURIES IN 1696 PATIENTS. <i>Eur J Cardiothorac Surg.</i> 1992; 6: 284-7.                                                                                                                                 | Study Design |
| 2  | Actis Dato GM, Aidala E and Ruffini E. Surgical management of flail chest. <i>Ann Thorac Surg.</i> 1999; 67: 1826-7.                                                                                                                                         | Study Design |
| 3  | Ahmed Z and Mohyuddin Z. Management of flail chest injury: Internal fixation versus endotracheal intubation and ventilation. <i>Journal of Thoracic and Cardiovascular Surgery.</i> 1995; 110: 1676-80.                                                      | Study Design |
| 4  | Akkus M, Utkusavas A, Hanozu M, Kaya M and Bakir I. Stabilization of Flail Chest and Fractured Sternum by Minimally Invasive Repair of Pectus Excavatum. <i>Thoracic and Cardiovascular Surgeon Reports.</i> 2015; 4: 11-3.                                  | Study Design |
| 5  | Althausen PL, Shannon S, Watts C, et al. Early surgical stabilization of flail chest with locked plate fixation. <i>J Orthop Trauma.</i> 2011; 25: 641-7.                                                                                                    | Study Design |
| 6  | Ananiadou O, Karaiskos T, Givissis P and Drossos G. Operative stabilization of skeletal chest injuries secondary to cardiopulmonary resuscitation in a cardiac surgical patient. <i>Interact Cardiovasc Thorac Surg.</i> 2010; 10: 478-80.                   | Study Design |
| 7  | Attia RQ, Schulte KL and Whitaker DC. eReply: In patients with acute flail chest does surgical rib fixation improve outcomes in terms of morbidity and mortality? <i>Interactive Cardiovascular and Thoracic Surgery.</i> 2016; 23: 319-20.                  | Study Design |
| 8  | Bailey J, VanderHeiden T, Burlew CC, et al. Thoracic hyperextension injury with complete "bony disruption" of the thoracic cage: Case report of a potentially life-threatening injury. <i>World Journal of Emergency Surgery.</i> 2012; 7.                   | Study Design |
| 9  | Beelen R, Rumbaut J and De Geest R. Surgical stabilization of a rib fracture using an angle stable plate. <i>Journal of Trauma - Injury, Infection and Critical Care.</i> 2007; 63: 1159-60.                                                                 | Study Design |
| 10 | Beltrami V, Martinelli G, Giansante P and Gentile K. An original technique for surgical stabilisation of traumatic flail chest. <i>Thorax.</i> 1978; 33: 528-9.                                                                                              | Study Design |
| 11 | Berthet JP, Solovei L, Tiffet O, et al. Chest-wall reconstruction in case of infection of the operative site: Is there any interest in titanium rib osteosynthesis. <i>Eur J Cardiothorac Surg.</i> 2013; 44: 866-74.                                        | Study Design |
| 12 | Bibas BJ and Bibas RA. Operative stabilization of flail chest using a prosthetic mesh and methylmethacrylate. <i>Eur J Cardiothorac Surg.</i> 2006; 29: 1064-6.                                                                                              | Study Design |
| 13 | Bille A, Okiror L, Campbell A, Simons J and Routledge T. Evaluation of long-term results and quality of life in patients who underwent rib fixation with titanium devices after trauma. <i>General Thoracic and Cardiovascular Surgery.</i> 2013; 61: 345-9. | Study Design |

|    |                                                                                                                                                                                                                                              |              |
|----|----------------------------------------------------------------------------------------------------------------------------------------------------------------------------------------------------------------------------------------------|--------------|
| 14 | Bille A, Okiror L, Karenovics W and Routledge T. Experience with titanium devices for rib fixation and coverage of chest wall defects. <i>Interactive Cardiovascular and Thoracic Surgery</i> . 2012; 15: 588-95.                            | Study Design |
| 15 | Bonne SL, Turnbull IR and Southard RE. Technique for repair of fractures and separations involving the cartilaginous portions of the anterior chest wall. <i>Chest</i> . 2015; 147: e199-e204.                                               | Study Design |
| 16 | Borrelly J and Aazami MH. New insights into the pathophysiology of flail segment: The implications of anterior serratus muscle in parietal failure. <i>Eur J Cardiothorac Surg</i> . 2005; 28: 742-9.                                        | Study Design |
| 17 | Bottlang M, Long WB, Phelan D, Fielder D and Madey SM. Surgical stabilization of flail chest injuries with MatrixRIB implants: A prospective observational study. <i>Injury</i> . 2013; 44: 232-8.                                           | Study Design |
| 18 | Brotzu G, Montisci R, Pillai W and Sanna S. Chest injuries. A review of 195 patients. <i>Ann Chir Gynaecol</i> . 1988; 77: 155-9.                                                                                                            | Study Design |
| 19 | Buyukkarabacak YB, Sengul AT, Celik B, et al. The Usefulness of Early Surgical Rib Stabilization in Flail Chest. <i>Acta Chir Belg</i> . 2015; 115: 408-13.                                                                                  | Study Design |
| 20 | Cacchione RN, Richardson JD and Seligson D. Painful nonunion of multiple rib fractures managed by operative stabilization. <i>Journal of Trauma - Injury, Infection and Critical Care</i> . 2000; 48: 319-21.                                | Study Design |
| 21 | Campbell N, Conaglen P, Martin K and Antippa P. Surgical stabilization of rib fractures using inion OTPS wraps-techniques and quality of life follow-up. <i>Journal of Trauma - Injury, Infection and Critical Care</i> . 2009; 67: 596-601. | Study Design |
| 22 | Caragounis EC, Olsen MF, Pazooki D and Granhed H. Surgical treatment of multiple rib fractures and flail chest in trauma: a one-year follow-up study. <i>World Journal of Emergency Surgery</i> . 2016; 11.                                  | Study Design |
| 23 | Chapman BC, Herbert B, Rodil M, et al. RibScore: A novel radiographic score based on fracture pattern that predicts pneumonia, respiratory failure, and tracheostomy. <i>J Trauma Acute Care Surg</i> . 2016; 80: 95-101.                    | Study Design |
| 24 | Charafeddine AH, Stone ME, Reddy SH, Teperman SH, Kaban JM and Cohen-Levy WB. Anterior chest wall disassociation: A pattern associated with serious underlying injury. <i>Am Surg</i> . 2015; 81: E244-E5.                                   | Study Design |
| 25 | Cho YH, Kim HK, Kang DY and Choi YH. Reoperative surgical stabilization of a painful nonunited rib fracture using bone grafting and a metal plate. <i>J Orthop Trauma</i> . 2009; 23: 605-6.                                                 | Study Design |
| 26 | De La Santa Barajas PM, Polo Otero MD, Delgado Sanchez- Gracian C, Leal Ruiloba S, Trinidad C and Choren Duran M. Surgical treatment for flail chest. <i>Interactive Cardiovascular and Thoracic Surgery</i> . 2012; 15: S5.                 | Study Design |
| 27 | De Moya M, Bramos T, Agarwal S, et al. Pain as an indication for rib fixation: A bi-institutional pilot study. <i>Journal of Trauma -</i>                                                                                                    | Study Design |

|    |                                                                                                                                                                                                                                              |              |
|----|----------------------------------------------------------------------------------------------------------------------------------------------------------------------------------------------------------------------------------------------|--------------|
|    | Injury, Infection and Critical Care. 2011; 71: 1750-4.                                                                                                                                                                                       |              |
| 28 | de Palma A, Sollitto F, Loizzi D, et al. Chest wall stabilization and reconstruction: Short and long-term results 5 years after the introduction of a new titanium plates system. Journal of Thoracic Disease. 2016; 8: 490-8.               | Study Design |
| 29 | Dean NC, Van Boerum DH and Liou TG. Rib plating of acute and sub-acute non-union rib fractures in an adult with cystic fibrosis: a case report. BMC Res Notes. 2014; 7: 681.                                                                 | Study Design |
| 30 | Defreest L, Tafen M, Bhakta A, et al. Open reduction and internal fixation of rib fractures in polytrauma patients with flail chest. Am J Surg. 2016; 211: 761-7.                                                                            | Study Design |
| 31 | Dehghan N, de Mestral C, McKee MD, Schemitsch EH and Nathens A. Flail chest injuries: A review of outcomes and treatment practices from the National Trauma Data Bank. Journal of Trauma and Acute Care Surgery. 2014; 76: 462-8.            | Study Design |
| 32 | Doben AR, Eriksson EA, Denlinger CE, et al. Surgical rib fixation for flail chest deformity improves liberation from mechanical ventilation. J Crit Care. 2014; 29: 139-43.                                                                  | Study Design |
| 33 | Dunlop RLE, Tiong W, Veerasingam D and Kelly JL. Novel use of hand fracture fixation plates in the surgical stabilisation of flail chest. Journal of Plastic, Reconstructive and Aesthetic Surgery. 2010; 63: e51-e3.                        | Study Design |
| 34 | Engel C, Krieg JC, Madey SM, Long WB and Bottlang M. Operative chest wall fixation with osteosynthesis plates. Journal of Trauma - Injury, Infection and Critical Care. 2005; 58: 181-6.                                                     | Study Design |
| 35 | Evman S, Kolbas I, Dogruyol T and Tezel C. A Case of Traumatic Flail Chest Requiring Stabilization with Surgical Reconstruction. Thoracic and Cardiovascular Surgeon Reports. 2015; 4: 8-10.                                                 | Study Design |
| 36 | Fagevik Olsén M, Pazooki D and Granhed H. Recovery after stabilising surgery for 'flail chest'. Unfallchirurgie. 2013; 39: 501-6.                                                                                                            | Study Design |
| 37 | Farquhar J, Almahrabi Y, Slobogean G, et al. No benefit to surgical fixation of flail chest injuries compared with modern comprehensive management: results of a retrospective cohort study. Canadian Journal of Surgery. 2016; 59: 299-303. | Study Design |
| 38 | Flagel BT, Luchette FA, Reed RL, et al. Half-a-dozen ribs: the breakpoint for mortality. Surgery. 2005; 138: 717-23; discussion 23-5.                                                                                                        | Study Design |
| 39 | Gabram SGA, Devanney J, Jones D and Jacobs LM. Delayed hemorrhagic pericardial effusion: Case reports of a complication from severe blunt chest trauma. Journal of Trauma. 1992; 32: 794-800.                                                | Study Design |
| 40 | Galvin IF, Costa R and Murton M. FRACTURED RIB WITH PENETRATING CARDIOPULMONARY INJURY. Ann Thorac Surg. 1993; 56: 558-9.                                                                                                                    | Study Design |

|    |                                                                                                                                                                                                                                                                          |              |
|----|--------------------------------------------------------------------------------------------------------------------------------------------------------------------------------------------------------------------------------------------------------------------------|--------------|
| 41 | Gardenbroek TJ, Bemelman M and Leenen LPH. Pseudarthrosis of the ribs treated with a locking compression plate: A report of three cases. <i>Journal of Bone and Joint Surgery - Series A</i> . 2009; 91: 1477-9.                                                         | Study Design |
| 42 | Gasparri MG, Almassi GH and Haasler GB. Surgical management of multiple rib fractures. <i>Chest</i> . 2003; 124: 295S-6S.                                                                                                                                                | Study Design |
| 43 | George RJ and Stern HS. An approach to surgical fixation of traumatic costosternal diastasis. <i>ANZ J Surg</i> . 2014; 84: 594-5.                                                                                                                                       | Study Design |
| 44 | Gerov I and Yablanski V. Damage control - Increasing the survival rates through emergency bone stabilization in a polytraumatized young patient. <i>Injury</i> . 2011; 42: S29.                                                                                          | Study Design |
| 45 | Ginsberg RJ and Kostin RF. 5. New approaches to the management of flail chest. <i>Can Med Assoc J</i> . 1977; 116: 613-5.                                                                                                                                                | Study Design |
| 46 | Govaert G, Schuetz M and Peters P. Rib fixation for a traumatic 'stove-in chest': An option to consider. <i>ANZ J Surg</i> . 2012; 82: 276-7.                                                                                                                            | Study Design |
| 47 | Granetzny A, Abd El-Aal M, Emam E, Shalaby A and Boseila A. Surgical versus conservative treatment of flail chest. Evaluation of the pulmonary status. <i>Interact Cardiovasc Thorac Surg</i> . 2005; 4: 583-7.                                                          | Study Design |
| 48 | Granhed HP and Pazooki D. A feasibility study of 60 consecutive patients operated for unstable thoracic cage. <i>J Trauma Manag Outcomes</i> . 2014; 8: 20.                                                                                                              | Study Design |
| 49 | Guernelli N, Bragaglia RB, Briccoli A, Mastroilli M and Vecchi R. Technique for the management of anterior flail chest. <i>Thorax</i> . 1979; 34: 247-8.                                                                                                                 | Study Design |
| 50 | Gunn JM, Savola J and Isotalo K. Left-sided diaphragmatic and pericardial ruptures with subluxation of the heart after blunt trauma. <i>Ann Thorac Surg</i> . 2012; 93: 317-9.                                                                                           | Study Design |
| 51 | Haasler GB. Open fixation of flail chest after blunt trauma. <i>Ann Thorac Surg</i> . 1990; 49: 993-5.                                                                                                                                                                   | Study Design |
| 52 | Hasenboehler EA, Bernard AC, Bottiggi AJ, et al. Treatment of traumatic flail chest with muscular sparing open reduction and internal fixation: Description of a surgical technique. <i>Journal of Trauma - Injury, Infection and Critical Care</i> . 2011; 71: 494-501. | Study Design |
| 53 | Hellberg K, de Vivie ER, Fuchs K, et al. Stabilization of flail chest by compression osteosynthesis--experimental and clinical results. <i>Thorac Cardiovasc Surg</i> . 1981; 29: 275-81.                                                                                | Study Design |
| 54 | Igai H, Kamiyoshihara M, Nagashima T and Ohtaki Y. Rib fixation for severe chest deformity due to multiple rib fractures. <i>Annals of Thoracic and Cardiovascular Surgery</i> . 2012; 18: 458-61.                                                                       | Study Design |
| 55 | Ivancic A, Saftic I, Cicvaric T, et al. Initial experience with external thoracic stabilization by the "figure of eight" osteosynthesis in                                                                                                                               | Study Design |

|    |                                                                                                                                                                                                                                             |              |
|----|---------------------------------------------------------------------------------------------------------------------------------------------------------------------------------------------------------------------------------------------|--------------|
|    | polytraumatized patients with flail chest injury. <i>Coll Antropol.</i> 2009; 33: 51-6.                                                                                                                                                     |              |
| 56 | Jayle CP, Allain G, Ingrand P, et al. Flail chest in polytraumatized patients: surgical fixation using Stracos reduces ventilator time and hospital stay. <i>Biomed Res Int.</i> 2015; 2015: 624723.                                        | Study Design |
| 57 | Kamiyoshihara M, Nagashima T, Ibe T and Takeyoshi I. Rupture of the diaphragm and pericardium with cardiac herniation after blunt chest trauma. <i>General Thoracic and Cardiovascular Surgery.</i> 2010; 58: 291-4.                        | Study Design |
| 58 | Kaplan T, Gulbahar G, Gundogdu AG and Han S. An unexpected complication of titanium rib clips. <i>Ann Thorac Surg.</i> 2014; 98: 2206-9.                                                                                                    | Study Design |
| 59 | Ke S, Duan H, Cai Y, Kang J and Feng Z. Thoracoscopy-assisted minimally invasive surgical stabilization of the anterolateral flail chest using Nuss bars. <i>Ann Thorac Surg.</i> 2014; 97: 2179-82.                                        | Study Design |
| 60 | Khandelwal G, Mathur RK, Shukla S and Maheshwari A. A prospective single center study to assess the impact of surgical stabilization in patients with rib fracture. <i>Int J Surg.</i> 2011; 9: 478-81.                                     | Study Design |
| 61 | Kilic D, Findikcioglu A, Akin S, et al. Factors affecting morbidity and mortality in flail chest: Comparison of anterior and lateral location. <i>Thoracic and Cardiovascular Surgeon.</i> 2011; 59: 45-8.                                  | Study Design |
| 62 | Kim JJ, Kim YH, Moon SW, Choi SY and Jeong SC. Nuss procedure for severe flail chest after blunt trauma. <i>Ann Thorac Surg.</i> 2015; 99: e25-7.                                                                                           | Study Design |
| 63 | Konstantinov IE, Saxena P and Wood DJ. Stabilisation of chronic flail chest: A novel approach of surgical fixation and osteogenesis. <i>Thorax.</i> 2009; 64: 265-6.                                                                        | Study Design |
| 64 | Kruger M, Zinne N, Zhang RY, et al. Multidirectional Thoracic Wall Stabilization: A New Device on the Scene. <i>Ann Thorac Surg.</i> 2013; 96: 1846-9.                                                                                      | Study Design |
| 65 | Kulaylat AN, Chesnut CH, 3rd, Santos AP and Armen SB. Successful operative rib fixation of traumatic flail chest in a patient with osteogenesis imperfecta. <i>Interact Cardiovasc Thorac Surg.</i> 2014; 19: 518-9.                        | Study Design |
| 66 | Landreneau RJ, Hinson Jr JM, Hazelrigg SR, Johnson JA, Boley TM and Curtis JJ. Strut fixation of an extensive flail chest. <i>Ann Thorac Surg.</i> 1991; 51: 473-5.                                                                         | Study Design |
| 67 | Lang M, Krumrey MT, Roder J, Ulmer J, Friederichs J and Buhren V. Late complications following blunt abdominal and thoracic trauma: Two case reports of a minimally invasive therapy. [German, English]. <i>Chirurg.</i> 2012; 83: 1078-81. | Study Design |
| 68 | Lang-Lazdunski L, Bonnet PM, Pons F, Brinquin L and Jancovici R. Traumatic extrathoracic lung herniation. <i>Ann Thorac Surg.</i>                                                                                                           | Study Design |

|    |                                                                                                                                                                                                                                                                                         |              |
|----|-----------------------------------------------------------------------------------------------------------------------------------------------------------------------------------------------------------------------------------------------------------------------------------------|--------------|
|    | 2002; 74: 927-9.                                                                                                                                                                                                                                                                        |              |
| 69 | Lanier ST, Wetterau M, Smith-Singares E, et al. Management of pulmonary hernia through a flail segment in closed thoracic trauma using open reduction, internal fixation and pectoralis major flap reconstruction: A case report. Canadian Journal of Plastic Surgery. 2011; 19: 145-7. | Study Design |
| 70 | Lardinois D, Krueger T, Dusmet M, Ghisletta N, Gugger M and Ris HB. Pulmonary function testing after operative stabilisation of the chest wall for flail chest. Eur J Cardiothorac Surg. 2001; 20: 496-501.                                                                             | Study Design |
| 71 | Lee SA, Hwang JJ, Chee HK, Kim YH and Lee WS. Flail chest stabilization with Nuss operation in presence of multiple myeloma. Journal of Thoracic Disease. 2014; 6: E43-E7.                                                                                                              | Study Design |
| 72 | Lee SK and Kang DK. Nuss procedure for surgical stabilization of flail chest with horizontal sternal body fracture and multiple bilateral rib fractures. Journal of Thoracic Disease. 2016; 8: E390-E2.                                                                                 | Study Design |
| 73 | Lee SY, Lee SJ, Lee CS and Lee KR. Spontaneous fractures of judet struts. Journal of Trauma - Injury, Infection and Critical Care. 2009; 67: 214.                                                                                                                                       | Study Design |
| 74 | Leenstra BS, Stolwijk A and Poeze M. Surgical stabilisation in a 13-year-old boy with traumatic flail chest. BMJ Case Rep. 2015; 2015 (no pagination).                                                                                                                                  | Study Design |
| 75 | Majercik S, Cannon Q, Granger SR, Van Boerum DH and White TW. Regarding: Long-term patient outcomes after surgical stabilization of rib fractures. Am J Surg. 2015; 210: 199-200.                                                                                                       | Study Design |
| 76 | Majercik S, Cannon Q, Granger SR, Vanboerum DH and White TW. Long-term patient outcomes after surgical stabilization of rib fractures. Am J Surg. 2014; 208: 88-92.                                                                                                                     | Study Design |
| 77 | Majercik S, Vijayakumar S, Olsen G, et al. Surgical stabilization of severe rib fractures decreases incidence of retained hemothorax and empyema. Am J Surg. 2015; 210: 1112-7.                                                                                                         | Study Design |
| 78 | Marasco S, Cooper J, Pick A and Kossmann T. Pilot study of operative fixation of fractured ribs in patients with flail chest. ANZ J Surg. 2009; 79: 804-8.                                                                                                                              | Study Design |
| 79 | Marasco S, Liew S, Edwards E, Varma D and Summerhayes R. Analysis of bone healing in flail chest injury: Do we need to fix both fractures per rib? Journal of Trauma and Acute Care Surgery. 2014; 77: 452-8.                                                                           | Study Design |
| 80 | Marasco S, Quayle M, Summerhayes R, Sutalo ID and Liovic P. An assessment of outcomes with intramedullary fixation of fractured ribs. J Cardiothorac Surg. 2016; 11.                                                                                                                    | Study Design |

|    |                                                                                                                                                                                                                                                      |              |
|----|------------------------------------------------------------------------------------------------------------------------------------------------------------------------------------------------------------------------------------------------------|--------------|
| 81 | Marasco SF, Davies AR, Cooper J, et al. Prospective randomized controlled trial of operative rib fixation in traumatic flail chest. <i>J Am Coll Surg.</i> 2013; 216: 924-32.                                                                        | Study Design |
| 82 | Maury JM, Roquet G, Marcotte G and David JS. Surgical fixation of rib fractures in chest wall trauma. <i>Intensive Care Med.</i> 2015; 41: 1483-4.                                                                                                   | Study Design |
| 83 | Maxwell CA, Mion LC and Dietrich MS. Hospitalized injured older adults: clinical utility of a rib fracture scoring system. <i>J Trauma Nurs.</i> 2012; 19: 168-74; quiz 75-6.                                                                        | Study Design |
| 84 | Mayberry JC, Ham LB, Schipper PH, Ellis TJ and Mullins RJ. Surveyed opinion of American trauma, orthopedic, and thoracic surgeons on rib and sternal fracture repair. <i>J Trauma.</i> 2009; 66: 875-9.                                              | Study Design |
| 85 | Mayberry JC, Kroeker AD, Ham LB, Mullins RJ and Trunkey DD. Long-Term Morbidity, Pain, and Disability after Repair of Severe Chest Wall Injuries. <i>Am Surg.</i> 2009; 75: 389-94.                                                                  | Study Design |
| 86 | Mayberry JC, Terhes JT, Ellis TJ, Wanek S and Mullins RJ. Absorbable Plates for Rib Fracture Repair: Preliminary Experience. <i>Journal of Trauma - Injury, Infection and Critical Care.</i> 2003; 55: 835-9.                                        | Study Design |
| 87 | Menard A, Testart J, Philippe JM and Grise P. TREATMENT OF FLAIL CHEST WITH JUDET STRUTS. <i>Journal of Thoracic and Cardiovascular Surgery.</i> 1983; 86: 300-5.                                                                                    | Study Design |
| 88 | Messing JA, Gall V and Sarani B. Successful management of severe flail chest via early operative intervention. <i>J Trauma Nurs.</i> 2014; 21: 83-5.                                                                                                 | Study Design |
| 89 | Metin B and Intepe YS. Operative ease and efficiency of nitinol memory rib plaque on the multiple costa and sternum fractures: Three-year clinical experience. <i>International Journal of Clinical and Experimental Medicine.</i> 2016; 9: 11510-7. | Study Design |
| 90 | Michelet P and Boussen S. Case scenario - thoracic trauma. <i>Annales Francaises D Anesthesie Et De Reanimation.</i> 2013; 32: 504-9.                                                                                                                | Study Design |
| 91 | Michelitsch C, Acklin YP, Hassig G, Sommer C and Furrer M. Operative stabilisation of chest wall trauma: Single center report of initial management and longterm outcome. <i>Respiration.</i> 2016; 91 (5): 456.                                     | Study Design |
| 92 | Mintz AC, Albano A, Reisdorff EJ, Choe KA and Lillegard W. Stress fracture of the first rib from serratus anterior tension: an unusual mechanism of injury. <i>Ann Emerg Med.</i> 1990; 19: 411-4.                                                   | Study Design |
| 93 | Morodomi Y, Okamoto T, Tagawa T, et al. A novel method of using bioabsorbable materials for the surgical repair of flail chest. <i>Journal of Trauma and Acute Care Surgery.</i> 2016; 81: 984-7.                                                    | Study Design |

|     |                                                                                                                                                                                                                                                                                   |              |
|-----|-----------------------------------------------------------------------------------------------------------------------------------------------------------------------------------------------------------------------------------------------------------------------------------|--------------|
| 94  | Moslam KE, Badawy MS and Asida SM. Evaluation of respiratory functions in chest trauma patients treated with thoracic wall stabilization. <i>Egyptian Journal of Chest Diseases and Tuberculosis</i> . 2015; 64: 213-7.                                                           | Study Design |
| 95  | Mouton W, Lardinois D, Furrer M, Regli B and Ris HB. Long-term follow-up of patients with operative stabilisation of a flail chest. <i>Thorac Cardiovasc Surg</i> . 1997; 45: 242-4.                                                                                              | Study Design |
| 96  | Muhm M, Harter J, Weiss C and Winkler H. Severe trauma of the chest wall: surgical rib stabilisation versus non-operative treatment. <i>European Journal of Trauma and Emergency Surgery</i> . 2013; 39: 257-65.                                                                  | Study Design |
| 97  | Nagaie T, Tateishi H and Minagawa S. New method for the internal stabilisation of flail chest. <i>Eur J Surg</i> . 1992; 158: 613-4.                                                                                                                                              | Study Design |
| 98  | Ng ABY, Giannoudis PV, Bismil Q, Hinsche AF and Smith RM. Operative stabilisation of painful non-united multiple rib fractures. <i>Injury</i> . 2001; 32: 637-9.                                                                                                                  | Study Design |
| 99  | Nickerson TP, Kim BD, Zielinski MD, Jenkins D and Schiller HJ. Use of a 90degree drill and screwdriver for rib fracture stabilization. <i>World J Surg</i> . 2015; 39: 789-93.                                                                                                    | Study Design |
| 100 | Nickerson TP, Thiels CA, Kim BD, Zielinski MD, Jenkins DH and Schiller HJ. Outcomes of Complete Versus Partial Surgical Stabilization of Flail Chest. <i>World J Surg</i> . 2016; 40: 236-41.                                                                                     | Study Design |
| 101 | Nicolau AE, Merlan V, Ciupan R, et al. Postoperative early enteral nutrition in a patient with politrauma and late duodenal perforation. <i>Chirurgia</i> . 2008; 103: 111-5.                                                                                                     | Study Design |
| 102 | Nirula R, Allen B, Layman R, Falimirski ME and Somberg LB. Rib fracture stabilization in patients sustaining blunt chest injury. <i>Am Surg</i> . 2006; 72: 307-9.                                                                                                                | Study Design |
| 103 | Noonan TJ, Sakryd G, Espinoza LM and Packer D. Posterior rib stress fracture in professional baseball pitchers. <i>American Journal of Sports Medicine</i> . 2007; 35: 654-8.                                                                                                     | Study Design |
| 104 | Olsen MF, Sloba M, Klarin L, Caragounis EC, Pazooki D and Granhed H. Physical function and pain after surgical or conservative management of multiple rib fractures - a follow-up study. <i>Scandinavian Journal of Trauma Resuscitation &amp; Emergency Medicine</i> . 2016; 24. | Study Design |
| 105 | Ovadia P, Szewczyk D and Rabinovici R. Bilateral cervical rib fracture secondary to blunt trauma. <i>J Trauma</i> . 1997; 43: 157-8.                                                                                                                                              | Study Design |
| 106 | Oyamatsu H, Ohata N and Narita K. New technique for fixing rib fracture with bioabsorbable plate. <i>Asian Cardiovascular and Thoracic Annals</i> . 2016; 24: 736-8.                                                                                                              | Study Design |
| 107 | Oyarzun JR, Bush AP, McCormick JR and Bolanowski PJP. Use of 3.5-mm acetabular reconstruction plates for internal fixation of                                                                                                                                                     | Study Design |



|     |                                                                                                                                                                                                                                                                                                          |              |
|-----|----------------------------------------------------------------------------------------------------------------------------------------------------------------------------------------------------------------------------------------------------------------------------------------------------------|--------------|
|     | flail chest injuries. <i>Ann Thorac Surg.</i> 1998; 65: 1471-4.                                                                                                                                                                                                                                          |              |
| 108 | Pape HC, Remmers D, Rice J, Ebisch M, Krettek C and Tscherne H. Appraisal of early evaluation of blunt chest trauma: Development of a standardized scoring system for initial clinical decision making. <i>Journal of Trauma-Injury Infection and Critical Care.</i> 2000; 49: 496-504.                  | Study Design |
| 109 | Perna V and Morera R. Prognostic factors in chest traumas: A prospective study of 500 patients. <i>Cirugía Española (English Edition).</i> 2016; 94: 165-70.                                                                                                                                             | Study Design |
| 110 | Pieracci FM, Johnson JL, Stovall RT and Jurkovich GJ. Completely thoracoscopic, intra-pleural reduction and fixation of severe rib fractures. <i>Trauma Case Reports.</i> 2015; 1: 39-43.                                                                                                                | Study Design |
| 111 | Pieracci FM, Lin Y, Rodil M, et al. A prospective, controlled clinical evaluation of surgical stabilization of severe rib fractures. <i>Journal of Trauma and Acute Care Surgery.</i> 2016; 80: 187-94.                                                                                                  | Study Design |
| 112 | Pieracci FM, Majercik S, Ali-Osman F, et al. Consensus statement: Surgical stabilization of rib fractures rib fracture colloquium clinical practice guidelines. <i>Injury.</i> 2016; 48: 307-21.                                                                                                         | Study Design |
| 113 | Pieracci FM, Rodil M, Stovall RT, et al. Surgical stabilization of severe rib fractures. <i>Journal of Trauma and Acute Care Surgery.</i> 2015; 78: 883-7.                                                                                                                                               | Study Design |
| 114 | Pimakhov V and Belov O. Optimization of chest stabilization methods for acute respiratory distress-syndrome prophylaxy and treatment in patients with craniothoracic trauma. <i>Interactive Cardiovascular and Thoracic Surgery.</i> 2014; 18: S60.                                                      | Study Design |
| 115 | Pimakhov V. Assessment of long-term outcome of different rib fracture stabilization methods for patients with craniothoracic trauma. <i>Interactive Cardiovascular and Thoracic Surgery Conference: 23rd European Conference on General Thoracic Surgery Lisbon Portugal Conference Start.</i> 2015; 21. | Study Design |
| 116 | Pompili C, Brunelli A, Xiume F and Sabbatini A. Chest wall reconstruction with a titanium rib bridge for post-traumatic parietal hernia. <i>Eur J Cardiothorac Surg.</i> 2010; 37: 737.                                                                                                                  | Study Design |
| 117 | Pressley CM, Fry WR, Philp AS, Berry SD and Smith RS. Predicting outcome of patients with chest wall injury. <i>Am J Surg.</i> 2012; 204: 910-4.                                                                                                                                                         | Study Design |
| 118 | Puranik G and Gillham N. Bilateral fractured clavicles with multiple rib fractures. <i>Emerg Med J.</i> 2007; 24: 675.                                                                                                                                                                                   | Study Design |
| 119 | Puranik G and Gillham N. Bilateral fractured clavicles with multiple rib fractures.[Erratum appears in <i>Emerg Med J.</i> 2007 Dec;24(12):867]. <i>Emerg Med J.</i> 2007; 24: 675.                                                                                                                      | Study Design |

|     |                                                                                                                                                                                                                                                                                                                                                                                                            |              |
|-----|------------------------------------------------------------------------------------------------------------------------------------------------------------------------------------------------------------------------------------------------------------------------------------------------------------------------------------------------------------------------------------------------------------|--------------|
| 120 | Pushkin S and Benyan A. Our first steps in osteosynthesis of fractured ribs using Matrix Rib technologies. European Respiratory Journal Conference: European Respiratory Society Annual Congress. 2012; 40.                                                                                                                                                                                                | Study Design |
| 121 | Qiu M, Shi Z, Xiao J, Zhang X, Ling S and Ling H. Potential Benefits of Rib Fracture Fixation in Patients with Flail Chest and Multiple Non-flail Rib Fractures. Indian Journal of Surgery. 2016; 78: 458-63.                                                                                                                                                                                              | Study Design |
| 122 | Ramponi F, Meredith GT, Bendinelli C and Soderlund T. Operative management of flail chest with anatomical locking plates (MatrixRib). ANZ J Surg. 2012; 82: 658-9.                                                                                                                                                                                                                                         | Study Design |
| 123 | Reber P, Ris HB, Inderbitzi R, Stark B and Nachbur B. Osteosynthesis of the injured chest wall: Use of the AO (Arbeitsgemeinschaft fur Osteosynthese) technique. Scandinavian Journal of Thoracic and Cardiovascular Surgery. 1993; 27: 137-42.                                                                                                                                                            | Study Design |
| 124 | Reber PU, Kniemeyer HW, Ris HB, et al. Reconstruction plates for internal fixation of flail chest [4] (multiple letters). Ann Thorac Surg. 1998; 66: 2158.                                                                                                                                                                                                                                                 | Study Design |
| 125 | Redwan B, Reichelt J, Freermann S, Semik M and Fischer S. Video-assisted minimally invasive rib osteosynthesis using intramedullary titanium splints in patients with unstable rib fractures: Treatment algorithm and first clinical results. Interactive Cardiovascular and Thoracic Surgery Conference: 23rd European Conference on General Thoracic Surgery Lisbon Portugal Conference Start. 2015; 21. | Study Design |
| 126 | Richardson JD, Franklin GA, Heffley S and Seligson D. Operative fixation of chest wall fractures: An underused procedure? Am Surg. 2007; 73: 591-6.                                                                                                                                                                                                                                                        | Study Design |
| 127 | Sahin MS, Ergun T, Cakmak G and Akyuz M. Posterior sternoclavicular joint dislocation with first rib fracture and ipsilateral vocal cord palsy. Journal of Emergency Medicine. 2012; 42: e121-e3.                                                                                                                                                                                                          | Study Design |
| 128 | Said SM, Goussous N, Zielinski MD, Schiller HJ and Kim BD. Surgical stabilization of flail chest: the impact on postoperative pulmonary function. European Journal of Trauma and Emergency Surgery. 2014; 40: 501-5.                                                                                                                                                                                       | Study Design |
| 129 | Sanchez-Lloret J, Letang E, Mateu M, et al. Indications and surgical treatment of the traumatic flail chest syndrome. An original technique. The Thoracic and cardiovascular surgeon. 1982; 30: 294-7.                                                                                                                                                                                                     | Study Design |
| 130 | Sarani B, Schulte L and Diaz JJ. Pitfalls associated with open reduction and internal fixation of fractured ribs. Injury. 2015; 46: 2335-40.                                                                                                                                                                                                                                                               | Study Design |
| 131 | Sawan TG, Nickerson TP, Thiels CA, et al. Load Sharing, not Load Bearing Plates: Lessons Learned from Failure of Rib Fracture Stabilization. The American surgeon. 2016; 82: E15-E7.                                                                                                                                                                                                                       | Study Design |

|     |                                                                                                                                                                                                                                                                                 |              |
|-----|---------------------------------------------------------------------------------------------------------------------------------------------------------------------------------------------------------------------------------------------------------------------------------|--------------|
| 132 | Schmit-Neuerburg KP, Weiss H and Labitzke R. Indication for thoracotomy and chest wall stabilization. <i>Injury</i> . 1982; 14: 26-34.                                                                                                                                          | Study Design |
| 133 | Schnuriger B and Lerf B. Unstable thorax after a coughing fit in a 70-year-old adipose patient. <i>Chirurg</i> . 2006; 77: 459-62.                                                                                                                                              | Study Design |
| 134 | Schulz-Drost S, Oppel P, Grupp S, et al. Surgical Fixation of Sternal Fractures: Preoperative Planning and a Safe Surgical Technique Using Locked Titanium Plates and Depth Limited Drilling. <i>Jove-Journal of Visualized Experiments</i> . 2015.                             | Study Design |
| 135 | Sekizawa A, Yanagawa Y, Nishi K, Takasu A and Sakamoto T. A case of thoracic degloving injury with flail chest. <i>Am J Emerg Med</i> . 2011; 29.                                                                                                                               | Study Design |
| 136 | Sellers E, Fearon P, Vincent A, Barnard S and Williams J. Rib fracture fixation and duration of ventilatory support: A single centre experience. <i>British Journal of Surgery</i> . 2013; 100: 216-.                                                                           | Study Design |
| 137 | Sellers EL, Fearon PV, Ripley C, Vincent A, Barnard S and Williams JR. The introduction of rib fracture fixation for traumatic flail chest injury: A single centre experience. <i>Trauma (United Kingdom)</i> . 2013; 15: 245-51.                                               | Study Design |
| 138 | Sherman JE, Salzberg A, Raskin NM and Beattie EJ. Chest Wall Stabilization Using Plate Fixation. <i>The Annals of Thoracic Surgery</i> . 1988; 46: 467-9.                                                                                                                       | Study Design |
| 139 | Skedros JG, Mears CS, Langston TD, Van Boerum DH and White TW. Medial scapular winging associated with rib fractures and plating corrected with pectoralis major transfer. <i>International Journal of Surgery Case Reports</i> . 2014; 5: 750-3.                               | Study Design |
| 140 | Slater MS, Mayberry JC and Trunkey DD. Operative stabilization of a flail chest six years after injury. <i>Ann Thorac Surg</i> . 2001; 72: 600-1.                                                                                                                               | Study Design |
| 141 | Solberg BD, Moon CN, Nissim AA, Wilson MT and Margulies DR. Treatment of chest wall implosion injuries without thoracotomy: Technique and clinical outcomes. <i>Journal of Trauma - Injury, Infection and Critical Care</i> . 2009; 67: 8-13.                                   | Study Design |
| 142 | Stadler M and Boogaerts JG. Dramatic improvement in oxygenation after sternotomy in a patient with acute respiratory distress syndrome. <i>Anaesthesia and Intensive Care</i> . 2012; 40: 352-4.                                                                                | Study Design |
| 143 | Tanaka H, Yukioka T, Yamaguti Y, et al. Surgical stabilization of internal pneumatic stabilization? A prospective randomized study of management of severe flail chest patients. <i>Journal of Trauma - Injury, Infection and Critical Care</i> . 2002; 52: 727-32.             | Study Design |
| 144 | Tarng YW, Liu YY, Huang FD, Lin HL, Wu TC and Chou YP. The surgical stabilization of multiple rib fractures using titanium elastic nail in blunt chest trauma with acute respiratory failure. <i>Surgical Endoscopy and Other Interventional Techniques</i> . 2016; 30: 388-95. | Study Design |
| 145 | Taylor BC, Fowler TT, French BG and Dominguez N. Clinical Outcomes of Surgical Stabilization of Flail Chest Injury. <i>Journal of</i>                                                                                                                                           | Study Design |

|     |                                                                                                                                                                                                                                                  |              |
|-----|--------------------------------------------------------------------------------------------------------------------------------------------------------------------------------------------------------------------------------------------------|--------------|
|     | the American Academy of Orthopaedic Surgeons. 2016; 24: 575-80.                                                                                                                                                                                  |              |
| 146 | Taylor BC, French BG and Fowler TT. Surgical approaches for rib fracture fixation. J Orthop Trauma. 2013; 27: e168-e73.                                                                                                                          | Study Design |
| 147 | TENG Ji-ping CY-g, NI Da, et al. Outcomes of traumatic flail chest treated by operative fixation versus conservative approach. Journal of Shanghai Jiaotong university (Medical Science). 2009; 29: 1495.                                        | Study Design |
| 148 | Thiels CA, Aho JM, Naik ND, et al. Infected hardware after surgical stabilization of rib fractures: Outcomes and management experience. Journal of Trauma and Acute Care Surgery. 2016; 17.                                                      | Study Design |
| 149 | Thomas AN, Blaisdell FW, Lewis FR, Jr. and Schlobohm RM. Operative stabilization for flail chest after blunt trauma. J Thorac Cardiovasc Surg. 1978; 75: 793-801.                                                                                | Study Design |
| 150 | Tiffet O, Susset V, Thevenet F, Sulaiman A, Molliex S and Zeni F. Anterior flay chest and nuss technique. Interactive Cardiovascular and Thoracic Surgery. 2011; 13: S14.                                                                        | Study Design |
| 151 | Tshomba Y, Bertoglio L, Marone EM, Psacharopulo D, Iob G and Chiesa R. Graft perforation by a dislocated rib fracture after open thoracoabdominal aortic repair: Emergent endovascular and open repair. J Endovasc Ther. 2010; 17: 126-30.       | Study Design |
| 152 | Van Peteghem S and Gevaert S. Tension pneumopericardium after blunt chest trauma. Acta Cardiologica. 2015; 70: 83.                                                                                                                               | Study Design |
| 153 | Vodicka J, Safranek J, Spidlen V, Vesely V, Ferda J and Louda J. Reconstruction of a crushed chest with HI-TEX (R) PARP NT implant. Unfallchirurg. 2007; 110: 255-8.                                                                             | Study Design |
| 154 | Voggenreiter G, Neudeck F, Aufmkolk M, Obertacke U and Schmit-Neuerburg KP. Operative chest wall stabilization in flail chest--outcomes of patients with or without pulmonary contusion. J Am Coll Surg. 1998; 187: 130-8.                       | Study Design |
| 155 | Vyhnanek F, Skala P and Skrabalova D. A contribution of multidetector computed tomography to indications for chest wall stabilisation in multiple rib fractures. Acta Chirurgiae Orthopaedicae et Traumatologiae Cechoslovaca. 2011; 78: 258-61. | Study Design |
| 156 | Wada T, Yasunaga H, Inokuchi R, et al. Effectiveness of surgical rib fixation on prolonged mechanical ventilation in patients with traumatic rib fractures: A propensity score-matched analysis. J Crit Care. 2015; 30: 1227-31.                 | Study Design |
| 157 | Wang S, Bao Z and Luo LF. Kirschner wire migration from the right second rib to the right ventricle: a case report. Chin J Traumatol. 2013; 16: 292-4.                                                                                           | Study Design |
| 158 | Webb LX and Meredith JW. A method for operative stabilization of multiple rib fractures in patients with flail chest. Techniques in Orthopaedics. 1991; 6: 1-9.                                                                                  | Study Design |
| 159 | Wiese MN, Kawel-Boehm N, de la Santa PM, et al. Functional results after chest wall stabilization with a new screwless fixation                                                                                                                  | Study Design |

|     |                                                                                                                                                                                                                                                               |              |
|-----|---------------------------------------------------------------------------------------------------------------------------------------------------------------------------------------------------------------------------------------------------------------|--------------|
|     | device. Eur J Cardiothorac Surg. 2015; 47: 868-75.                                                                                                                                                                                                            |              |
| 160 | Wu W-M, Yang Y, Gao Z-L, Zhao T-C and He W-W. Which is better to multiple rib fractures, surgical treatment or conservative treatment? International Journal of Clinical and Experimental Medicine. 2015; 8: 7930-6.                                          | Study Design |
| 161 | Xu JQ, Qiu PL, Yu RG, Gong SR, Ye Y and Shang XL. Better short-term efficacy of treating severe flail chest with internal fixation surgery compared with conservative treatments. European Journal of Medical Research. 2015; 24.                             | Study Design |
| 162 | Yanagawa Y, Kaneko N, Hagiwara A, Kimura T and Isoda S. Delayed sudden cardiac arrest induced by aortic injury with a posterior fracture of the left rib. Gen Thorac Cardiovasc Surg. 2008; 56: 91-2.                                                         | Study Design |
| 163 | Yang Y, Dong L-w and Wang J. Memory alloy embracing fixator in treatment of multiple fractured ribs and flail chest. World Journal of Emergency Medicine. 2010; 1: 212-5.                                                                                     | Study Design |
| 164 | Zehr M, Klar N and Malthaner RA. Risk Score for Predicting Mortality in Flail Chest. Ann Thorac Surg. 2015; 100: 223-8.                                                                                                                                       | Study Design |
| 165 | Zhang W, Song F, Yang Y and Tang J. Asymptomatic intracardiac migration of a Kirschner wire from the right rib. Interact Cardiovasc Thorac Surg. 2014; 18: 525-6.                                                                                             | Study Design |
| 166 | Zhang XF, Guo ZQ, Zhao CC, Xu CY and Wang Z. Management of patients with flail chest by surgical fixation using claw-type titanium plate. J Cardiothorac Surg. 2015; 10.                                                                                      | Study Design |
| 167 | Zhang Y, Tang X, Xie H and Wang RL. Comparison of surgical fixation and nonsurgical management of flail chest and pulmonary contusion. Am J Emerg Med. 2015; 33: 937-40.                                                                                      | Study Design |
| 168 | Mayberry J. Early stabilization of flail chest with locked plate fixation. J Orthop Trauma. 2011; 25: 648.                                                                                                                                                    | Study Design |
| 169 | Mayberry J. Surgical stabilization of severe rib fractures: Several caveats. Journal of Trauma and Acute Care Surgery. 2015; 79: 515.                                                                                                                         | Study Design |
| 170 | McKay DR, Fawzy HF, McKay KM, Nitsch R and Mahoney JL. Are chest compressions safe for the patient reconstructed with sternal plates? Evaluating the safety of cardiopulmonary resuscitation using a human cadaveric model. J Cardiothorac Surg. 2010; 5: 64. | Study Design |
| 171 | Mirzatoioei F and Bazzazi A. Analysis of orthopedic injuries in an airplane landing disaster and a suggested mechanism of trauma. European Journal of Orthopaedic Surgery and Traumatology. 2013; 23: 257-62.                                                 | Study Design |
| 172 | Mohan CPVR and Mohan R. Management of warfare chest injuries. Medical Journal Armed Forces India. 2010; 66: 329-32.                                                                                                                                           | Study Design |
| 173 | Molnar TF. Surgical management of chest wall trauma. Thorac Surg Clin. 2010; 20: 475-85.                                                                                                                                                                      | Study Design |

|     |                                                                                                                                                                                                                                        |              |
|-----|----------------------------------------------------------------------------------------------------------------------------------------------------------------------------------------------------------------------------------------|--------------|
| 174 | Moore B. Operative stabilization of nonpenetrating chest injuries. <i>Journal of Cardiovascular Surgery</i> . 1975; 70: 619–30.                                                                                                        | Study Design |
| 175 | Paris F TV, Blasco E, Cantó A, Casillas M, Pastor J, et al. . Surgical stabilization of traumatic flail chest. <i>Thorax</i> . 1975; 30: 521-7.                                                                                        | Study Design |
| 176 | Paydar S, Mousavi SM, Niakan H, Abbasi HR and Bolandparvaz S. Appropriate management of flail chest needs proper injury classification. <i>J Am Coll Surg</i> . 2012; 215: 743-4.                                                      | Study Design |
| 177 | Reber PU, Kniemeyer HW and Ris HB. Reconstruction plates for internal fixation of flail chest. <i>Ann Thorac Surg</i> . 1998; 66: 2158.                                                                                                | Study Design |
| 178 | Ricci WM, McAndrew C, Merriman D and Gardner MJ. What's new in orthopaedic trauma. <i>Journal of Bone and Joint Surgery - Series A</i> . 2011; 93: 1746-56.                                                                            | Study Design |
| 179 | Samarrai AR. Costosynthetic stabilization of massive chest wall instability. <i>Int Surg</i> . 1990; 75: 231-3.                                                                                                                        | Study Design |
| 180 | Shah TJ. On internal fixation for flail chest. <i>J Thorac Cardiovasc Surg</i> . 1996; 112: 849-50.                                                                                                                                    | Study Design |
| 181 | Leo F, Venissac N, Lopez S, Pop D, Savinelli F and Mouroux J. Anterior flail chest and sternal fracture: To fix or not to fix? <i>Asian Cardiovascular and Thoracic Annals</i> . 2003; 11: 188.                                        | Study Design |
| 182 | Vyhnanek F, Jirava D, Ocadlik M and Skrabalova D. Surgical Stabilisation of Flail Chest Injury: Indications, Technique and Results. <i>Acta Chirurgiae Orthopaedicae Et Traumatologiae Cechoslovaca</i> . 2015; 82: 303-7.             | Not English  |
| 183 | Vodicka J, Spidlen V, Safranek J, Simanek V and Altmann P. Severe injury to the chest wall - Experience with surgical therapy. <i>Zentralblatt Fur Chirurgie</i> . 2007; 132: 542-6.                                                   | Not English  |
| 184 | Barajas PMD, Otero MDP, Sanchez-Gracian CD, et al. Surgical fixation of rib fractures with clips and titanium bars (STRATOS (TM) System). Preliminary experience. <i>Cirurgia Espanola</i> . 2010; 88: 180-6.                          | Not English  |
| 185 | Di Fabio D, Benetti D, Benvenuti M and Mombelloni G. [Surgical stabilization of post-traumatic flail chest. Our experience with 116 cases treated]. <i>Minerva Chir</i> . 1995; 50: 227-33.                                            | Not English  |
| 186 | Quaranta M and Vassallo G. Indications and technique of costal osteosynthesis in the flail chest. <i>Quaderni di Cooperazione Sanitaria</i> . 1985; NO. 2: 61-7.                                                                       | Not English  |
| 187 | Kakegawa S, Kamiyoshihara M, Ohtaki A, Ohki S and Morishita Y. [Surgical fixation of the ribs for flail chest injuries]. <i>Kyobu geka The Japanese journal of thoracic surgery</i> . 2006; 59: 974-9.                                 | Not English  |
| 188 | Jimenez-Quijano A, Varon-Cotes JC, Garcia-Herreros-Hellal LG, Espinosa-Moya B, Rivero-Rapalino O and Salazar-Marulanda M. Rib cage osteosynthesis. Literature review and case reports. <i>Cirurgia Y Cirujanos</i> . 2015; 83: 339-44. | Not English  |

|     |                                                                                                                                                                                                                                                                |              |
|-----|----------------------------------------------------------------------------------------------------------------------------------------------------------------------------------------------------------------------------------------------------------------|--------------|
| 189 | Nolasco-de la Rosa AL, Mosinoz-Montes R, Matehuala-Garcia J, Roman-Guzman E, Quero-Sandoval F and Reyes-Miranda AL. Unstable thorax fixation with bioabsorbable plates and screws. Presentation of a case series. <i>Cirugia Y Cirujanos</i> . 2015; 83: 23-8. | Not English  |
| 190 | Padilla JMC, Nadal SB, Kurowski K, Munoz CG and Paniagua JMR. Use and versatility of titanium for the reconstruction of the thoracic wall. <i>Cirugia Espanola</i> . 2014; 92: 89-94.                                                                          | Not English  |
| 191 | Albaugh G, Kann B, Puc MM, Vemulapalli P, Marra S and Ross S. Age-adjusted outcomes in traumatic flail chest injuries in the elderly. <i>Am Surg</i> . 2000; 66: 978-81.                                                                                       | Intervention |
| 192 | Ali BA and Sanfilippo F. TS02 MANAGEMENT OF FLAIL CHEST IN TRAUMA: ANALYSIS OF RISK FACTORS AFFECTING OUTCOME. <i>ANZ J Surg</i> . 2007; 77: A93-A.                                                                                                            | Intervention |
| 193 | Anonymous. Management of the stove-in chest with paradoxical movement. <i>Br Med J</i> . 1977; 1: 1242.                                                                                                                                                        | Intervention |
| 194 | Athanassiadi K, Gerazounis M and Theakos N. Management of 150 flail chest injuries: analysis of risk factors affecting outcome. <i>Eur J Cardiothorac Surg</i> . 2004; 26: 373-6.                                                                              | Intervention |
| 195 | Athanassiadi K, Theakos N, Kalantzi N and Gerazounis M. Prognostic factors in flail-chest patients. <i>Eur J Cardiothorac Surg</i> . 2010; 38: 466-71.                                                                                                         | Intervention |
| 196 | Balci AE, Eren S, Cakir O and Eren MN. Open fixation in flail chest: Review of 64 patients. <i>Asian Cardiovascular and Thoracic Annals</i> . 2004; 12: 11-5.                                                                                                  | Intervention |
| 197 | Battle CE and Evans PA. Predictors of mortality in patients with flail chest: a systematic review. <i>Emerg Med J</i> . 2015; 32: 961-5.                                                                                                                       | Intervention |
| 198 | Bugaev N, Breeze JL, Alhazmi M, et al. Magnitude of rib fracture displacement predicts opioid requirements. <i>Journal of Trauma and Acute Care Surgery</i> . 2016; 81: 699-704.                                                                               | Intervention |
| 199 | California Uo. Early Aggressive Pain Management is Associated With Improved Outcomes in Blunt Thoracic Trauma. WHO clinical trials registry platform. 2011.                                                                                                    | Intervention |
| 200 | Cannon RM, Smith JW, Franklin GA, Harbrecht BG, Miller FB and Richardson JD. Flail chest injury: Are we making any progress? <i>Am Surg</i> . 2012; 78: 398-402.                                                                                               | Intervention |
| 201 | Fabbri C, Mazieri M, Cirocchi R, Bisacci R and Cagini L. [Flail chest]. <i>Minerva Chir</i> . 1996; 51: 669-73.                                                                                                                                                | Intervention |
| 202 | Freedland M, Wilson RF, Bender JS and Levison MA. The management of flail chest injury: factors affecting outcome. <i>J Trauma</i> . 1990; 30: 1460-8.                                                                                                         | Intervention |

|     |                                                                                                                                                                                                                                                     |              |
|-----|-----------------------------------------------------------------------------------------------------------------------------------------------------------------------------------------------------------------------------------------------------|--------------|
| 203 | Gordy S, Fabricant L, Ham B, Mullins R and Mayberry J. The contribution of rib fractures to chronic pain and disability. Am J Surg. 2014; 207: 659-62.                                                                                              | Intervention |
| 204 | Grosse A, Grosse C, Steinbach L and Anderson S. MRI findings of prolonged post-traumatic sternal pain. Skeletal Radiology. 2007; 36: 423-9.                                                                                                         | Intervention |
| 205 | Hameed M. Discussion. Am J Surg. 2014; 207: 662-3.                                                                                                                                                                                                  | Intervention |
| 206 | Hammad AMM and Regal MA. Is Routine Spiral CT-Chest Justified in Evaluation of the Major Blunt Trauma Patients? European Journal of Trauma and Emergency Surgery. 2009; 35: 31-4.                                                                   | Intervention |
| 207 | Hildebrand F, Giannoudis PV, van Griensven M, et al. Management of polytraumatized patients with associated blunt chest trauma: a comparison of two European countries. Injury-International Journal of the Care of the Injured. 2005; 36: 293-302. | Intervention |
| 208 | Ho. H-Y. Subcutaneous longitudinal acupuncture: a novel and effective approach to acute pain relief in inpatients with rib fracture. WHO clinical trials registry platform. 2012.                                                                   | Intervention |
| 209 | Karev DV. Operative management of the flail chest. Wiadomosci lekarskie (Warsaw, Poland : 1960). 1997; 50 Suppl 1 Pt 2: 205-8.                                                                                                                      | Intervention |
| 210 | Khalpey Z, Marsh KM, Ferng A, et al. First in man: Sternal reconstruction with autologous stem cells. ASAIO Journal. 2015; 61: e31-e2.                                                                                                              | Intervention |
| 211 | Lazcano A, Dougherty JM and Kruger M. Use of rib belts in acute rib fractures. Am J Emerg Med. 1989; 7: 97-100.                                                                                                                                     | Intervention |
| 212 | Lee KJ, Jung K, Kim J and Kwon J. Bone scan as a screening test for missed fractures in severely injured patients. Orthopaedics and Traumatology: Surgery and Research. 2014; 100: 953-7.                                                           | Intervention |
| 213 | Liman ST, Kuzucu A, Tastepe AI, Ulasan GN and Topcu S. Chest injury due to blunt trauma. Eur J Cardiothorac Surg. 2003; 23: 374-8.                                                                                                                  | Intervention |
| 214 | Marasco S, Lee G, Summerhayes R, Fitzgerald M and Bailey M. Quality of life after major trauma with multiple rib fractures. Injury. 2015; 46: 61-5.                                                                                                 | Intervention |
| 215 | Miller TL, Harris JD and Kaeding CC. Stress fractures of the ribs and upper extremities: causation, evaluation, and management. Sports medicine (Auckland, NZ). 2013; 43: 665-74.                                                                   | Intervention |
| 216 | Montréal Ud. Analgesic Effect of Intranasal Calcitonin on Patients With Fractured Ribs. ClinicalTrialsgov. 2007.                                                                                                                                    | Intervention |



|     |                                                                                                                                                                                                                                                                                                               |              |
|-----|---------------------------------------------------------------------------------------------------------------------------------------------------------------------------------------------------------------------------------------------------------------------------------------------------------------|--------------|
| 217 | Nau T, Aldrian S, Koenig F and Vecsei V. Fixation of femoral fractures in multiple-injury patients with combined chest and head injuries. ANZ J Surg. 2003; 73: 1018-21.                                                                                                                                      | Intervention |
| 218 | Nishiumi N, Fujimori S, Katoh N, Iwasaki M, Inokuchi S and Inoue H. Treatment with internal pneumatic stabilization for anterior flail chest. Tokai Journal of Experimental and Clinical Medicine. 2007; 32: 126-30.                                                                                          | Intervention |
| 219 | O'Connor LJ. Females and fractures. Orthopaedic Physical Therapy Clinics of North America. 1996; 5: 85-117.                                                                                                                                                                                                   | Intervention |
| 220 | Pulley BR, Taylor BC, Fowler TT, Dominguez N and Trinh TQ. Utility of three-dimensional computed tomography for the surgical management of rib fractures. Journal of Trauma and Acute Care Surgery. 2015; 78: 530-4.                                                                                          | Intervention |
| 221 | Richardson JD, Adams L and Flint LM. Selective management of flail chest and pulmonary contusion. Annals of Surgery. 1982; 196: 481-7.                                                                                                                                                                        | Intervention |
| 222 | Sherepo KM. A portable device for rib traction. Biomedical Engineering. 2004; 38: 296-8.                                                                                                                                                                                                                      | Intervention |
| 223 | Sivaloganathan M, Stephens R and Grocott M. Management of flail chest. Hospital medicine (London, England : 1998). 2000; 61: 811.                                                                                                                                                                             | Intervention |
| 224 | System TCH. Pain Relief for Ventilated Patients With Multiple Rib Fractures Using the ON-Q Pain Relief System. ClinicalTrials.gov. 2009.                                                                                                                                                                      | Intervention |
| 225 | Trupka A, Waydhas C, Hallfeldt KKJ, Nast-Kolb D, Pfeifer KJ and Schweiberer L. Value of thoracic computed tomography in the first assessment of severely injured patients with blunt chest trauma: Results of a prospective study. Journal of Trauma - Injury, Infection and Critical Care. 1997; 43: 405-11. | Intervention |
| 226 | Vana PG, Neubauer DC and Luchette FA. Contemporary management of flail chest. Am Surg. 2014; 80: 527-35.                                                                                                                                                                                                      | Intervention |
| 227 | Velmahos GC, Vassiliu P, Chan LS, Murray JA, Berne TV and Demetriades D. Influence of flail chest on outcome among patients with severe thoracic cage trauma. Int Surg. 2002; 87: 240-4.                                                                                                                      | Intervention |
| 228 | Wilson RF, Murray C and Antonenko DR. Nonpenetrating thoracic injuries. Surgical Clinics of North America. 1977; 57: 17-36.                                                                                                                                                                                   | Intervention |
| 229 | Yeginsu A, Ergin M and Gurlek K. A rare complication after Velpeau bandage: hemopneumothorax. Ulusal Travma Ve Acil Cerrahi Dergisi-Turkish Journal of Trauma & Emergency Surgery. 2013; 19: 274-6.                                                                                                           | Intervention |
| 230 | Kamiyoshihara M, Kawatani N and Igai H. Modified application of a wound retractor for surgery in chest trauma. Asian Cardiovascular and Thoracic Annals. 2015; 23: 232-4.                                                                                                                                     | Intervention |

|     |                                                                                                                                                                                                                                                                     |              |
|-----|---------------------------------------------------------------------------------------------------------------------------------------------------------------------------------------------------------------------------------------------------------------------|--------------|
| 231 | McCunn M, Gordon EKB and Scott TH. Anesthetic Concerns in Trauma Victims Requiring Operative Intervention: The Patient Too Sick to Anesthetize. <i>Anesthesiology Clinics</i> . 2010; 28: 97-116.                                                                   | Intervention |
| 232 | Diethelm AG and Battle W. Management of flail chest injury: a review of 75 cases. <i>Am Surg</i> . 1971; 37: 667-70.                                                                                                                                                | Intervention |
| 233 | Agnew AM, Schafman M, Moorhouse K, White SE and Kang YS. The effect of age on the structural properties of human ribs. <i>Journal of the Mechanical Behavior of Biomedical Materials</i> . 2015; 41: 302-14.                                                        | Non- Human   |
| 234 | Ahern BJ and Levine DG. Multiple Rib Fracture Repair in a Neonatal Holstein Calf. <i>Veterinary Surgery</i> . 2009; 38: 787-90.                                                                                                                                     | Non- Human   |
| 235 | Bellezzo F, Hunt RJ, Provost P, Bain FT and Kirker-Head C. Surgical repair of rib fractures in 14 neonatal foals: case selection, surgical technique and results. <i>Equine Veterinary Journal</i> . 2004; 36: 557-62.                                              | Non- Human   |
| 236 | Blackburne WB, Waddell JN, Swain MV, de Sous RJA and Kieser JA. Biomechanical investigation of impact induced rib fractures of a porcine infant surrogate model. <i>Journal of the Mechanical Behavior of Biomedical Materials</i> . 2016; 62: 588-98.              | Non- Human   |
| 237 | Bottlang M, Helzel I, Long W, Fitzpatrick D and Madey S. Less-invasive stabilization of rib fractures by intramedullary fixation: A biomechanical evaluation. <i>Journal of Trauma - Injury, Infection and Critical Care</i> . 2010; 68: 1218-24.                   | Non- Human   |
| 238 | Bottlang M, Helzel I, Long WB and Madey S. Anatomically contoured plates for fixation of Rib fractures. <i>Journal of Trauma - Injury, Infection and Critical Care</i> . 2010; 68: 611-5.                                                                           | Non- Human   |
| 239 | Bottlang M, Helzel I, Long WB and Madey SM. Less-invasive stabilization of rib fractures by intramedullary fixation: A biomechanical evaluation of two techniques. <i>Chest Conference: American College of Chest Physicians Annual Meeting, CHEST</i> . 2009; 136. | Non- Human   |
| 240 | Bottlang M, Helzel I, Long WM and Madey S. Anatomically contoured plates for fixation of rib fractures. <i>Chest Conference: American College of Chest Physicians Annual Meeting, CHEST</i> . 2009; 136.                                                            | Non- Human   |
| 241 | Bottlang M, Walleser S, Noll M, et al. Biomechanical rationale and evaluation of an implant system for rib fracture fixation. <i>European Journal of Trauma and Emergency Surgery</i> . 2010; 36: 417-26.                                                           | Non- Human   |
| 242 | Campbell N, Richardson M and Antippa P. Biomechanical testing of two devices for internal fixation of fractured ribs. <i>Journal of Trauma - Injury, Infection and Critical Care</i> . 2010; 68: 1234-8.                                                            | Non- Human   |
| 243 | Casha AR, Camilleri L, Manche A, et al. Internal rib structure can be predicted using mathematical models: An anatomic study comparing the chest to a shell dome with application to understanding fractures. <i>Clinical Anatomy</i> . 2015; 28: 1008-16.          | Non- Human   |
| 244 | Downs C and Rodgeron D. The use of nylon cable ties to repair rib fractures in neonatal foals. <i>Canadian Veterinary Journal</i> -                                                                                                                                 | Non- Human   |

|     |                                                                                                                                                                                                                                                                                 |            |
|-----|---------------------------------------------------------------------------------------------------------------------------------------------------------------------------------------------------------------------------------------------------------------------------------|------------|
|     | Revue Veterinaire Canadienne. 2011; 52: 307-9.                                                                                                                                                                                                                                  |            |
| 245 | Fukunaga T, Yamashiro T, Oya S, Takeshita N, Takigawa M and Takano-Yamamoto T. Connective tissue growth factor mRNA expression pattern in cartilages is associated with their type I collagen expression. Bone. 2003; 33: 911-8.                                                | Non- Human |
| 246 | Gabrielli F, Subit D, Ogam E, Guillemain P, Kent RW and Masson C. Time-frequency analysis to detect bone fracture in impact biomechanics. Application to the thorax. Medical Engineering & Physics. 2009; 31: 952-8.                                                            | Non- Human |
| 247 | Goodspeed MJ, Vanderby R and Agarwal S. Mechanical testing of modeled rib fractures with plated fixation on the internal surface. Journal of Surgical Research. 2014; 186 (2): 663.                                                                                             | Non- Human |
| 248 | Gyhra A, Torres P, Pino J, Palacios S and Cid L. Experimental flail chest: Ventilatory function with fixation of flail segment in internal and external position. Journal of Trauma-Injury Infection and Critical Care. 1996; 40: 977-9.                                        | Non- Human |
| 249 | Helzel I, Long W, Fitzpatrick D, Madey S and Bottlang M. Evaluation of intramedullary rib splints for less-invasive stabilisation of rib fractures. Injury. 2009; 40: 1104-10.                                                                                                  | Non- Human |
| 250 | Huang KN, Xu ZF, Sun JX, et al. Stabilization of multiple rib fractures in a canine model. Journal of Surgical Research. 2014; 192: 621-7.                                                                                                                                      | Non- Human |
| 251 | Jerram RM and Herron MR. Scapular fractures in dogs. Compendium on Continuing Education for the Practicing Veterinarian. 1998; 20: 1254-+.                                                                                                                                      | Non- Human |
| 252 | Kato Y, Nakashima K, Iwamoto M, et al. EFFECTS OF INTERLEUKIN-1 ON SYNTHESSES OF ALKALINE-PHOSPHATASE, TYPE-X COLLAGEN, AND 1,25-DIHYDROXYVITAMIN-D(3) RECEPTOR, AND MATRIX CALCIFICATION IN RABBIT CHONDROCYTE CULTURES. Journal of Clinical Investigation. 1993; 92: 2323-30. | Non- Human |
| 253 | Kawahata H, Sotobayashi D, Aoki M, et al. Continuous infusion of angiotensin II modulates hypertrophic differentiation and apoptosis of chondrocytes in cartilage formation in a fracture model mouse. Hypertension Research. 2015; 38: 382-93.                                 | Non- Human |
| 254 | Kemper AR, Kennedy EA, McNally C, Manoogian SJ, Stitzel JD and Duma SM. Reducing Chest Injuries in Automobile Collisions: Rib Fracture Timing and Implications for Thoracic Injury Criteria. Annals of Biomedical Engineering. 2011; 39: 2141-51.                               | Non- Human |
| 255 | Kindig M, Lau AG and Kent RW. Biomechanical Response of Ribs Under Quasistatic Frontal Loading. Traffic Injury Prevention. 2011; 12: 377-87.                                                                                                                                    | Non- Human |
| 256 | Kraus BM, Richardson DW, Sheridan G and Wilkins PA. Multiple rib fracture in a neonatal foal using a nylon strand suture repair technique. Veterinary Surgery. 2005; 34: 399-404.                                                                                               | Non- Human |

|     |                                                                                                                                                                                                                                            |            |
|-----|--------------------------------------------------------------------------------------------------------------------------------------------------------------------------------------------------------------------------------------------|------------|
| 257 | Liovic P, Sutalo ID and Marasco SF. Stress analysis of a centrally fractured rib fixated by an intramedullary screw. <i>Computer Methods in Biomechanics and Biomedical Engineering</i> . 2014; 17: 944-57.                                | Non- Human |
| 258 | Liovic P, Sutalo ID and Marasco SF. Fixation of a human rib by an intramedullary telescoping splint anchored by bone cement. <i>Computer Methods in Biomechanics and Biomedical Engineering</i> . 2016; 19: 1297-305.                      | Non- Human |
| 259 | Lopez-Valdes FJ, Juste-Lorente O, Maza-Frechin M, et al. Analysis of occupant kinematics and dynamics in nearside oblique impacts. <i>Traffic Injury Prevention</i> . 2016; 17: 86-92.                                                     | Non- Human |
| 260 | Marasco SF, Liovic P and Sutalo ID. Structural integrity of intramedullary rib fixation using a single bioresorbable screw. <i>Journal of Trauma and Acute Care Surgery</i> . 2012; 73: 668-73.                                            | Non- Human |
| 261 | Marasco SF, Sutalo ID and Bui AV. Mode of failure of rib fixation with absorbable plates: A clinical and numerical modeling study. <i>Journal of Trauma - Injury, Infection and Critical Care</i> . 2010; 68: 1225-33.                     | Non- Human |
| 262 | McDonald AC, Schuijers JA, Shen PJ, Gundlach AL and Grills BL. Expression of galanin and galanin receptor-1 in normal bone and during fracture repair in the rat. <i>Bone</i> . 2003; 33: 788-97.                                          | Non- Human |
| 263 | Mohr M, Abrams E, Engel C, Long WB and Bottlang M. Geometry of human ribs pertinent to orthopedic chest-wall reconstruction. <i>J Biomech</i> . 2007; 40: 1310-7.                                                                          | Non- Human |
| 264 | Mommsen P, Barkhausen T, Frink M, et al. Productive capacity of alveolar macrophages and pulmonary organ damage after femoral fracture and hemorrhage in IL-6 knockout mice. <i>Cytokine</i> . 2011; 53: 60-5.                             | Non- Human |
| 265 | Murata K, Kitaori T, Oishi S, et al. Stromal Cell-Derived Factor 1 Regulates the Actin Organization of Chondrocytes and Chondrocyte Hypertrophy. <i>Plos One</i> . 2012; 7.                                                                | Non- Human |
| 266 | Norrdin RW, Hoopes KJ and O'Toole D. Skeletal changes in hemochromatosis of salers cattle. <i>Veterinary Pathology</i> . 2004; 41: 612-23.                                                                                                 | Non- Human |
| 267 | Perry MJ and Youngson CC. IN-VITRO FRACTURE FIXATION - ADHESIVE SYSTEMS COMPARED WITH A CONVENTIONAL TECHNIQUE. <i>British Journal of Oral &amp; Maxillofacial Surgery</i> . 1995; 33: 224-7.                                              | Non- Human |
| 268 | Perry TG, Mageswaran P, Colbrunn RW, Bonner TF, Francis T and McLain RF. Biomechanical evaluation of a simulated T-9 burst fracture of the thoracic spine with an intact rib cage. <i>Journal of Neurosurgery-Spine</i> . 2014; 21: 481-8. | Non- Human |
| 269 | Pignon C, Vallefuoco R, Krumeich N and Moissonnier P. SURGICAL REPAIR OF A PELVIC FRACTURE IN A FERRET (MLISTELA PLITORILIS FLTRO). <i>Journal of Exotic Pet Medicine</i> . 2014; 23: 96-100.                                              | Non- Human |

|     |                                                                                                                                                                                                                                                                           |            |
|-----|---------------------------------------------------------------------------------------------------------------------------------------------------------------------------------------------------------------------------------------------------------------------------|------------|
| 270 | Puma F, Ragusa M and Daddi G. Chest wall stabilization with synthetic reabsorbable material. <i>The Annals of thoracic surgery</i> . 1992; 53: 408-11.                                                                                                                    | Non- Human |
| 271 | Qi BC, Yu JL, Zhao Y, Zhu D and Yu TC. Mouse fracture models: a primer. <i>International Journal of Clinical and Experimental Medicine</i> . 2016; 9: 12418-29.                                                                                                           | Non- Human |
| 272 | Recknagel S, Bindl R, Brochhausen C, et al. Systemic inflammation induced by a thoracic trauma alters the cellular composition of the early fracture callus. <i>Journal of Trauma and Acute Care Surgery</i> . 2013; 74: 531-7.                                           | Non- Human |
| 273 | Recknagel S, Bindl R, Kurz J, et al. Experimental Blunt Chest Trauma Impairs Fracture Healing in Rats. <i>Journal of Orthopaedic Research</i> . 2011; 29: 734-9.                                                                                                          | Non- Human |
| 274 | Recknagel S, Bindl R, Kurz J, et al. C5aR-antagonist significantly reduces the deleterious effect of a blunt chest trauma on fracture healing. <i>Journal of Orthopaedic Research</i> . 2012; 30: 581-6.                                                                  | Non- Human |
| 275 | Rinnovati R, Romagnoli N, Castagnetti C, Pirrone A, Valentini S and Spadari A. Stabilization of multiple rib fractures with cerclage wire in a colt trotter. <i>Ippologia</i> . 2014; 25: 9-12.                                                                           | Non- Human |
| 276 | Sales JR, Ellis TJ, Gillard J, et al. Biomechanical testing of a novel, minimally invasive rib fracture plating system. <i>Journal of Trauma - Injury, Infection and Critical Care</i> . 2008; 64: 1270-4.                                                                | Non- Human |
| 277 | Schoell SL, Weaver AA, Vavalle NA and Stitzel JD. Age- and Sex-Specific Thorax Finite Element Model Development and Simulation. <i>Traffic Injury Prevention</i> . 2015; 16: S57-S65.                                                                                     | Non- Human |
| 278 | Shaw G, Lessley DJ, Ash JL, et al. Side Impact PMHS Thoracic Response With Large-Volume Air Bag. <i>Traffic Injury Prevention</i> . 2014; 15: 40-7.                                                                                                                       | Non- Human |
| 279 | Shkrum MJ, McClafferty KJ, Green RN, Nowak ES and Young JG. Mechanisms of aortic injury in fatalities occurring in motor vehicle collisions. <i>Journal of Forensic Sciences</i> . 1999; 44: 44-56.                                                                       | Non- Human |
| 280 | Slobogean GP, Kim H, Russell JP, Stockton DJ, Hsieh AH and O'Toole RV. Rib fracture fixation restores inspiratory volume and peak flow in a full thorax human cadaveric breathing model. <i>Archives of Trauma Research</i> . 2015; 4 (4) (no pagination).                | Non- Human |
| 281 | Teixeira P, Puntel V, Martinelli I and Queiroz S. Flail chest: ribs stabilization suture. An original technique. 1997, p.155-7.                                                                                                                                           | Non- Human |
| 282 | Vallefuoco R, Bedu AS, Manassero M, Viateau V, Niebauer G and Moissonnier P. Computed tomographic study of the optimal safe implantation corridors in feline thoraco-lumbar vertebrae. <i>Veterinary and Comparative Orthopaedics and Traumatology</i> . 2013; 26: 372-8. | Non- Human |

|     |                                                                                                                                                                                                                                                              |            |
|-----|--------------------------------------------------------------------------------------------------------------------------------------------------------------------------------------------------------------------------------------------------------------|------------|
| 283 | Vu KC, Skourtis ME, Gong X, Zhou MH, Ozaki W and Winn SR. Reduction of rib fractures with a bioresorbable plating system: Preliminary observations. <i>Journal of Trauma-Injury Infection and Critical Care</i> . 2008; 64: 1264-9.                          | Non- Human |
| 284 | Yoganandan N, Pintar FA, Gennarelli TA, Martin PG and Ridella SA. Chest Deflections and Injuries in Oblique Lateral Impacts. <i>Traffic Injury Prevention</i> . 2008; 9: 162-7.                                                                              | Non- Human |
| 285 | Yu YH, Fan CL, Hsu YH, Chou YC, Ueng SWN and Liu SJ. A Novel Biodegradable Polycaprolactone Fixator for Osteosynthesis Surgery of Rib Fracture: In Vitro and in Vivo Study. <i>Materials</i> . 2015; 8: 7714-22.                                             | Non- Human |
| 286 | Humphries AR and Lube M. Use of porcine dermal allograft to prevent pulmonary herniation in a patient with multiple displaced rib fractures requiring Surgical Fixation. <i>Am Surg</i> . 2015; 81: E109-E10.                                                | Non- Human |
| 287 | Abdolmohammadi S, Hetu PO, Neron A and Blaise G. efficacy of an intrathecal multidrug infusion for pain control in older adults and in end-stage malignancies: a report of three cases. <i>Pain Research &amp; Management</i> . 2015; 20: 118-22.            | Population |
| 288 | Abudou M, Chen X, Kong X and Wu T. Surgical versus non-surgical treatment for thoracolumbar burst fractures without neurological deficit. <i>Cochrane Database Syst Rev</i> . John Wiley & Sons, Ltd, 1996.                                                  | Population |
| 289 | Ahmad RM, Umakanthan R, Lawson M, Leacche M, Solenkova NV and Byrne JG. Nonsurgical management of traumatic cardiac pseudoaneurysms. <i>Journal of Thoracic and Cardiovascular Surgery</i> . 2010; 139: e83-e5.                                              | Population |
| 290 | Ahmed B, Perry M and Shetty S. INTERESTING CASE: Pseudoaneurysm of internal carotid artery after severe maxillofacial injury which caused superior orbital fissure syndrome. <i>British Journal of Oral and Maxillofacial Surgery</i> . 2006; 44: 316.       | Population |
| 291 | Ahmed S, Truong L, Eknayan G and Workeneh B. Evolving spectrum of HIV-associated nephropathy. <i>Nephron - Clinical Practice</i> . 2013; 121: c131-c5.                                                                                                       | Population |
| 292 | Akkas Y, Peri NG, Kocer B and Kaplan T. Repair of lung herniation with titanium prosthetic ribs and Prolene mesh. <i>Asian Cardiovascular and Thoracic Annals</i> . 2016; 24: 280-2.                                                                         | Population |
| 293 | Anavian J, Guthrie ST and Cole PA. Surgical management of multiple painful rib nonunions in patient with a history of severe shoulder girdle trauma: A case report and literature review. <i>J Orthop Trauma</i> . 2009; 23: 600-4.                          | Population |
| 294 | Anderson M, Rose P, Jacofsky DJ, Torchia ME and Dahm DL. Intrathoracic fracture-dislocation of the proximal humerus: A case report and report of a new surgical technique. <i>Journal of Trauma - Injury, Infection and Critical Care</i> . 2007; 63: 920-3. | Population |
| 295 | Andreula C, Marano G and Ettore GC. Spinal alveolar hydatidosis. <i>Rivista Di Neuroradiologia</i> . 2001; 14: 95-101.                                                                                                                                       | Population |
| 296 | Andronic A, Weusten A and Harrison J. Anatomic healing of a humeral shaft fracture despite failure of plate fixation-locking plates                                                                                                                          | Population |

|     |                                                                                                                                                                                                                                                                              |            |
|-----|------------------------------------------------------------------------------------------------------------------------------------------------------------------------------------------------------------------------------------------------------------------------------|------------|
|     | are a good idea. <i>European Orthopaedics and Traumatology</i> . 2015; 6: 471-3.                                                                                                                                                                                             |            |
| 297 | Antoni M, Charles YP, Walter A, Bogorin I and Steib JP. Consolidation of anterior grafts in thoracolumbar fractures. <i>Eur Spine J</i> . 2011; 20 (7): 1198.                                                                                                                | Population |
| 298 | Aoki M, Hatayama Y, Kawaguchi H, et al. Clinical outcome of stereotactic body radiotherapy for primary and oligometastatic lung tumors: a single institutional study with almost uniform dose with different five treatment schedules. <i>Radiation Oncology</i> . 2016; 11. | Population |
| 299 | Bahk MS, Kuhn JE, Galatz LM, Connor PM and Williams Jr GR. Acromioclavicular and sternoclavicular injuries and clavicular, glenoid, and scapular fractures. <i>Journal of Bone and Joint Surgery - Series A</i> . 2009; 91: 2492-510.                                        | Population |
| 300 | Bakowitz M, Bruns B and McCunn M. Acute lung injury and the acute respiratory distress syndrome in the injured patient. <i>Scandinavian Journal of Trauma Resuscitation &amp; Emergency Medicine</i> . 2012; 20.                                                             | Population |
| 301 | Baldwin C and Weekes CE. Dietary advice with or without oral nutritional supplements for disease-related malnutrition in adults. <i>Cochrane Database Syst Rev</i> . John Wiley & Sons, Ltd, 1996.                                                                           | Population |
| 302 | Baljet B. Aspects of the history of osteogenesis imperfecta (Vrolik's syndrome). <i>Annals of Anatomy-Anatomischer Anzeiger</i> . 2002; 184: 1-7.                                                                                                                            | Population |
| 303 | Barrera LM, Perel P, Ker K, Cirocchi R, Farinella E and Morales Uribe CH. Thromboprophylaxis for trauma patients. <i>Cochrane Database Syst Rev</i> . John Wiley & Sons, Ltd, 1996.                                                                                          | Population |
| 304 | Bartolek D, Finci D, Munjiza A, Prkacin I, Cavric G and Ljubicic S. Lepirudin and heparin-induced thrombocytopenia in a trauma patient with acetabulum fracture: A case report. <i>Neurologia Croatica</i> . 2013; 62: 27-31.                                                | Population |
| 305 | Bavare C, Kim M, Blackmon S, Ellsworth W, Davies MG and Reardon MJ. Delayed aortic rupture after aortic endograft placement in patient with spinal hardware. <i>Ann Thorac Surg</i> . 2011; 92: 1512-4.                                                                      | Population |
| 306 | Beaven A, Toman E and Cooper J. Post binder radiography in pelvic trauma. <i>BMJ Case Rep</i> . 2016; 2016 (no pagination).                                                                                                                                                  | Population |
| 307 | Beisse R, Potulski M, Temme C and Buhren V. Endoscopic controlled splitting of the diaphragm. A minimal invasive approach for the treatment of thoraco-lumbar fractures of the spine. <i>Unfallchirurg</i> . 1998; 101: 619-27.                                              | Population |
| 308 | Benli IT, Kaya A, Uruc V and Akalin S. Minimum 5-year follow-up surgical results of post-traumatic thoracic and lumbar kyphosis treated with anterior instrumentation - Comparison of anterior plate and dual rod systems. <i>Spine</i> . 2007; 32: 986-94.                  | Population |
| 309 | Berg EE. The sternal-rib complex: A possible fourth column in thoracic spine fractures. <i>Spine</i> . 1993; 18: 1916-9.                                                                                                                                                     | Population |
| 310 | Berthet JP, Canaud L, Alric P, et al. Reconstruction of the chest wall in case of primary or secondary infection of the operative                                                                                                                                            | Population |

|     |                                                                                                                                                                                                                                                                            |            |
|-----|----------------------------------------------------------------------------------------------------------------------------------------------------------------------------------------------------------------------------------------------------------------------------|------------|
|     | site: Is there any interest in the titanium rib osteosynthesis? Interactive Cardiovascular and Thoracic Surgery. 2012; 15: S40.                                                                                                                                            |            |
| 311 | Betts DC and Radue R. The Effects of Positioning the Operative Limb on Tibial and Fibular Nerve Somatosensory Responses during Acetabulum Fracture Repair: A Report of Two Unusual Cases. Neurodiagnostic Journal. 2016; 56: 151-64.                                       | Population |
| 312 | Borens O, Bettschart V, Fischer JF and Mouhsine E. Missed traumatic hernia of the abdominal wall after contralateral pelvic and acetabular fracture. Journal of Trauma - Injury, Infection and Critical Care. 2003; 54: 626.                                               | Population |
| 313 | Brass P, Hellmich M, Ladra A, Ladra J and Wrzosek A. Percutaneous techniques versus surgical techniques for tracheostomy. Cochrane Database Syst Rev. John Wiley & Sons, Ltd, 1996.                                                                                        | Population |
| 314 | Briccoli A, De Paolis M, Campanacci L, et al. Chondrosarcoma of the chest wall: A clinical analysis. Surgery Today. 2002; 32: 291-6.                                                                                                                                       | Population |
| 315 | Buchbinder R, Golmohammadi K, Johnston RV, et al. Percutaneous vertebroplasty for osteoporotic vertebral compression fracture. Cochrane Database Syst Rev. John Wiley & Sons, Ltd, 1996.                                                                                   | Population |
| 316 | Burnham JM, Kim DC and Kamineni S. Midshaft clavicle fractures: A critical review. Orthopedics. 2016; 39: e814-e21.                                                                                                                                                        | Population |
| 317 | Cao J, Dai N and Chen C. Ruptured azygos vein caused by blunt trauma on left chest. Chinese Medical Journal. 2012; 125: 3355-6.                                                                                                                                            | Population |
| 318 | Capo JT, Hastings H, Choung E, Kinchelov T, Rossy W and Steinberg B. Hemicondylar hamate replacement arthroplasty for proximal interphalangeal joint fracture dislocations: An assessment of graft suitability. Journal of Hand Surgery-American Volume. 2008; 33A: 733-9. | Population |
| 319 | Cappell MS. Injury to endoscopic personnel from tripping over exposed cords, wires, and tubing in the endoscopy suite: A preventable cause of potentially severe workplace injury. Digestive Diseases and Sciences. 2010; 55: 947-51.                                      | Population |
| 320 | Carless PA, Henry DA and Anthony DM. Fibrin sealant use for minimising peri-operative allogeneic blood transfusion. Cochrane Database Syst Rev. John Wiley & Sons, Ltd, 1996.                                                                                              | Population |
| 321 | Celik B, Sahin E, Nadir A and Kaptanoglu M. Sternum fractures and effects of associated injuries. Thoracic and Cardiovascular Surgeon. 2009; 57: 468-71.                                                                                                                   | Population |
| 322 | Chapman MW. Role of bone stability in open fractures. Instr Course Lect. 1982; 31: 75-87.                                                                                                                                                                                  | Population |
| 323 | Chen C, Huang XJ, Chen MJ, Yu FL, Yin BL and Yuan YC. Surgical management of a giant sternal chondromyxoid fibroma: a case report. J Cardiothorac Surg. 2015; 10.                                                                                                          | Population |



|     |                                                                                                                                                                                                                                                               |            |
|-----|---------------------------------------------------------------------------------------------------------------------------------------------------------------------------------------------------------------------------------------------------------------|------------|
| 324 | Cheung A, Van Rensburg L and Tytherleigh-Strong GM. Surgical versus conservative interventions for treating fractures of the middle third of the clavicle. <i>Cochrane Database Syst Rev.</i> John Wiley & Sons, Ltd, 1996.                                   | Population |
| 325 | Chin KJ, Cubillos JE and Alakkad H. Single, double or multiple-injection techniques for non-ultrasound guided axillary brachial plexus block in adults undergoing surgery of the lower arm. <i>Cochrane Database Syst Rev.</i> John Wiley & Sons, Ltd, 1996.  | Population |
| 326 | Choi BH, Huh JY, Suh CH and Kim KN. An in vitro evaluation of miniplate fixation techniques for fractures of the atrophic edentulous mandible. <i>International Journal of Oral and Maxillofacial Surgery.</i> 2005; 34: 174-7.                               | Population |
| 327 | Chou SS, Sena MJ and Wong MS. Use of sternalock plating system in acute treatment of unstable traumatic sternal fractures. <i>Ann Thorac Surg.</i> 2011; 91: 597-9.                                                                                           | Population |
| 328 | Cirocchi R, Randolph JJ, Montedori A, et al. Staples versus sutures for surgical wound closure in adults. <i>Cochrane Database Syst Rev.</i> John Wiley & Sons, Ltd, 1996.                                                                                    | Population |
| 329 | Cobanoglu U, Hiz O, Sayir F, Ediz L and Sehitogullari A. Traumatic and atraumatic sternal fractures: Analysis of 13 cases. <i>Turk Toraks Dergisi.</i> 2012; 13: 146-51.                                                                                      | Population |
| 330 | Colaut F, Toniolo L, Sernagiotto C, Pozzobon M and Sartori CA. Thoracotomy for hemotorax in a woman with Parkinson: A case report. <i>Chirurgia.</i> 2006; 19: 379-81.                                                                                        | Population |
| 331 | Crestanello JA, Samuels LE, Kaufman MS, Thomas MP and Talucci R. Sternal fracture with mediastinal hematoma: Delayed cardiopulmonary sequelae. <i>Journal of Trauma - Injury, Infection and Critical Care.</i> 1999; 47: 161-4.                               | Population |
| 332 | Cross MB, Nam D, Van Der Meulen MCH and Bostrom MPG. A rare case of a bisphosphonate-induced peri-prosthetic femoral fracture. <i>Journal of Bone and Joint Surgery - Series B.</i> 2012; 94 B: 994-7.                                                        | Population |
| 333 | Cuschieri J, Kralovich KA, Patton JH, Horst HM, Obeid FN and Karmy-Jones R. Anterior mediastinal abscess after closed sternal fracture. <i>Journal of Trauma - Injury, Infection and Critical Care.</i> 1999; 47: 551-4.                                      | Population |
| 334 | Daniello A and Gabler HC. Characteristics of Injuries in Motorcycle-to-Barrier Collisions in Maryland. <i>Transportation Research Record.</i> 2012: 92-8.                                                                                                     | Population |
| 335 | Darabos N, Gusic N, Vlahovic T, Darabos A, Popovic I and Vlahovic I. Staged management of knee dislocation in polytrauma injured patients. <i>Injury.</i> 2013; 44: S40-S5.                                                                                   | Population |
| 336 | De Lutio Di Castelguidone E, Pinto A, Merola S, Stavolo C and Romano L. Role of spiral and multislice computed tomography in the evaluation of traumatic and spontaneous oesophageal perforation. Our experience. <i>Radiologia Medica.</i> 2005; 109: 252-9. | Population |

|     |                                                                                                                                                                                                                                        |            |
|-----|----------------------------------------------------------------------------------------------------------------------------------------------------------------------------------------------------------------------------------------|------------|
| 337 | De Vloo P, Declerck L, Stevens O and De Vleeschouwer S. A posttraumatic pontomedullary rent with good outcome. <i>Acta Neurochirurgica</i> . 2016; 158: 577-9.                                                                         | Population |
| 338 | Denis F and Burkus JK. LATERAL DISTRACTION INJURIES TO THE THORACIC AND LUMBAR SPINE - A REPORT OF 3 CASES. <i>Journal of Bone and Joint Surgery-American Volume</i> . 1991; 73A: 1049-53.                                             | Population |
| 339 | Dettmer MS, Willi N, Thiesler T, Ochsner P and Cathomas G. Nonthrombotic pulmonary embolism: New insights-a large autopsy study. <i>Laboratory Investigation</i> . 2013; 93: 4A-5A.                                                    | Population |
| 340 | Dimitroulias A, Molinero KG, Krenk DE, Muffly MT, Altman DT and Altman GT. Outcomes of Nonoperatively Treated Displaced Scapular Body Fractures. <i>Clinical Orthopaedics and Related Research</i> . 2011; 469: 1459-65.               | Population |
| 341 | Dirkes S, Dickinson S, Havey R and O'Brien D. Prone positioning: Is it safe and effective? <i>Critical Care Nursing Quarterly</i> . 2012; 35: 64-75.                                                                                   | Population |
| 342 | Dougall N, Maayan N, Soares-Weiser K, McDermott LM and McIntosh A. Transcranial magnetic stimulation (TMS) for schizophrenia. <i>Cochrane Database Syst Rev</i> . John Wiley & Sons, Ltd, 1996.                                        | Population |
| 343 | Ehrnthaller C, Huber-Lang M, Kovtun A, et al. C5aR inhibition in the early inflammatory phase does not affect bone regeneration in a model of uneventful fracture healing. <i>European Journal of Medical Research</i> . 2016; 21.     | Population |
| 344 | Elsayed A, Elgamal E, Elsayed AA, Wasserberg J and Kuncz A. Non-surgical treatment of massive traumatic corpus callosum hematoma after blunt head injury: A case report. <i>Neurologia i Neurochirurgia Polska</i> . 2016; 50: 309-12. | Population |
| 345 | El-Sayed KM. Temporomandibular Joint Reconstruction With Costochondral Graft Using Modified Approach. <i>International Journal of Oral and Maxillofacial Surgery</i> . 2008; 37: 897-902.                                              | Population |
| 346 | Engels PT, Beckett AN, Rubenfeld GD, et al. Physical rehabilitation of the critically ill trauma patient in the ICU. <i>Crit Care Med</i> . 2013; 41: 1790-801.                                                                        | Population |
| 347 | Eren F, Oksuz S, Melikoglu C, Karagoz H and Ulkur E. Saddle-Nose Deformity Repair with Microplate-Adapted Costal Cartilage. <i>Aesthetic Plastic Surgery</i> . 2014; 38: 733-41.                                                       | Population |
| 348 | Escribano MC and Laria PC. Posterolateral extracavitary approach to the spinal column. <i>Neurocirugia</i> . 1996; 7: 119-25.                                                                                                          | Population |
| 349 | Fabio R, Meredith GT, Bendinelli C and Soderlund T. Operative management of flail chest with anatomical locking plates (MatrixRib). <i>ANZ J Surg</i> . 2012; 82: 658-9.                                                               | Population |
| 350 | Farooque K, Khatri K, Dev C, Sharma V and Gupta B. Mechanism of injury and management in traumatic anterior shoulder                                                                                                                   | Population |

|     |                                                                                                                                                                                                                                           |            |
|-----|-------------------------------------------------------------------------------------------------------------------------------------------------------------------------------------------------------------------------------------------|------------|
|     | dislocation with concomitant humeral shaft and ipsilateral scapula fracture: A case report and review of the literature. <i>Journal of Medical Case Reports</i> . 2014; 8 (1) (no pagination).                                            |            |
| 351 | Fatimi SH, Anees A, Muzaffar M and Hanif HM. Acute traumatic subclavian artery thrombosis and its successful repair via resection and end-to-end anastomosis. <i>Chinese Journal of Traumatology - English Edition</i> . 2010; 13: 255-6. | Population |
| 352 | Floyd MW, France JC and Hubbard DF. Early experience with the proximal femoral locking plate. <i>Orthopedics</i> . 2013; 36: e1488-e94.                                                                                                   | Population |
| 353 | Freyrie A, Gasbarrini A, Simoes CE, Gallitto E and Gargiulo M. Delayed presentation of a thoracic aortic injury with a vertebral pedicle screw. <i>Ann Vasc Surg</i> . 2013; 27: 499.e1-3.                                                | Population |
| 354 | Gallo DR, Lett ED and Conner WC. Surgical repair of a chronic traumatic sternal fracture. <i>Ann Thorac Surg</i> . 2006; 81: 726-8.                                                                                                       | Population |
| 355 | Galvagno Jr SM, Sikorski R, Hirshon JM, et al. Helicopter emergency medical services for adults with major trauma. <i>Cochrane Database Syst Rev</i> . John Wiley & Sons, Ltd, 1996.                                                      | Population |
| 356 | Gardet E, Fouilloux V, Guerlin A and Bertin F. Subcutaneous fistula from a pneumatocele: Surgical treatment. <i>Revue Des Maladies Respiratoires</i> . 2010; 27: 1105-8.                                                                  | Population |
| 357 | Garg H, Twerenbold R and Zellweger R. Propeller and jet-ski injuries during Christmas and New Year in Western Australia. <i>Medical Journal of Australia</i> . 2011; 195: 704-5.                                                          | Population |
| 358 | Gelalis ID, Karageorgos A, Arnaoutoglou C, et al. Traumatic pneumorrhachis: Etiology, pathomechanism, diagnosis, and treatment. <i>Spine Journal</i> . 2011; 11: 153-7.                                                                   | Population |
| 359 | George R, Jeba J, Ramkumar G, Chacko AG and Tharyan P. Interventions for the treatment of metastatic extradural spinal cord compression in adults. <i>Cochrane Database Syst Rev</i> . John Wiley & Sons, Ltd, 1996.                      | Population |
| 360 | Geracci JJ and Morey AF. Bladder entrapment after external fixation of traumatic pubic diastasis: Importance of follow-up computed tomography in establishing prompt diagnosis. <i>Military Medicine</i> . 2000; 165: 492-3.              | Population |
| 361 | Geusens PP and Van Den Bergh JP. Osteoporosis and osteoarthritis: Shared mechanisms and epidemiology. <i>Current Opinion in Rheumatology</i> . 2016; 28: 97-103.                                                                          | Population |
| 362 | Giannoudis PV and Schneider E. Principles of fixation of osteoporotic fractures. <i>Journal of Bone and Joint Surgery - Series B</i> . 2006; 88: 1272-8.                                                                                  | Population |
| 363 | Gillespie LD, Robertson MC, Gillespie WJ, et al. Interventions for preventing falls in older people living in the community.                                                                                                              | Population |

|     |                                                                                                                                                                                                                                                                    |            |
|-----|--------------------------------------------------------------------------------------------------------------------------------------------------------------------------------------------------------------------------------------------------------------------|------------|
|     | Cochrane Database Syst Rev. John Wiley & Sons, Ltd, 1996.                                                                                                                                                                                                          |            |
| 364 | Goh MH, Teo LT and Pua U. Pulmonary vein pseudoaneurysm secondary to blunt trauma: A novel management strategy. <i>Ann Thorac Surg.</i> 2016; 101: 1197-200.                                                                                                       | Population |
| 365 | Good WF, Maitz G, King J, Gennari R and Gur D. Observer performance assessment of JPEG-compressed high-resolution chest images. In: Krupinski EA, (ed.). <i>Medical Imaging 1999: Image Perception and Performance.</i> 1999, p. 8-13.                             | Population |
| 366 | Goyal R, Shukla RN, Kumar G and Tandon M. Supraventricular tachycardia after an intercostal nerve block with bupivacaine treated with 10% intralipid. <i>Journal of Anaesthesiology Clinical Pharmacology.</i> 2011; 27: 564-5.                                    | Population |
| 367 | Guay J, Suresh S and Kopp S. The use of ultrasound guidance for perioperative neuraxial and peripheral nerve blocks in children. <i>Cochrane Database Syst Rev.</i> John Wiley & Sons, Ltd, 1996.                                                                  | Population |
| 368 | Guerrissi JO. Treatment Options in Maxillofacial Fractures. <i>Journal of Craniofacial Surgery.</i> 2016; 27: E445-E7.                                                                                                                                             | Population |
| 369 | Gurusamy KS, Koti R, Wilson P and Davidson BR. Antibiotic prophylaxis for the prevention of methicillin-resistant <i>Staphylococcus aureus</i> (MRSA) related complications in surgical patients. <i>Cochrane Database Syst Rev.</i> John Wiley & Sons, Ltd, 1996. | Population |
| 370 | Haddock NT, Weichman KE and Saadeh PB. Reconstruction of a massive thoracic defect: The use of anatomic rib-spanning plates. <i>Journal of Plastic, Reconstructive and Aesthetic Surgery.</i> 2012; 65: e253-e6.                                                   | Population |
| 371 | Hagino H. Other non-vertebral fractures. <i>Best Practice &amp; Research in Clinical Rheumatology.</i> 2013; 27: 731-41.                                                                                                                                           | Population |
| 372 | Hagino T, Ono T and Hamada Y. Unusual double clavicle fracture complicated by ipsilateral scapular neck fracture. <i>Journal of Orthopaedic Science.</i> 2002; 7: 417-9.                                                                                           | Population |
| 373 | Haine SE, Paelinck BP and Vrints CJ. Post-traumatic focal true left ventricular aneurysm. <i>Heart.</i> 2004; 90: 1009.                                                                                                                                            | Population |
| 374 | Hajj-Chahine J, Allain G, Tomasi J, Corbi P and Jayle C. Late postcardiotomy sternal dehiscence: A simple approach using stratos system. <i>Journal of Cardiac Surgery.</i> 2013; 28: 632-4.                                                                       | Population |
| 375 | Hamoud K, Hershkovitz I, Hanani A, Marom L and Abbas J. Internal stabilization of a flexion-distraction injury of the upper cervical spine of a toddler: A new technique and literature review. <i>Spine.</i> 2012; 37: E400-E7.                                   | Population |
| 376 | Handoll HHG and Brorson S. Interventions for treating proximal humeral fractures in adults. <i>Cochrane Database Syst Rev.</i> John Wiley & Sons, Ltd, 1996.                                                                                                       | Population |
| 377 | Handoll HHG, Sherrington C and Mak JCS. Interventions for improving mobility after hip fracture surgery in adults. <i>Cochrane Database Syst Rev.</i> John Wiley & Sons, Ltd, 1996.                                                                                | Population |

|     |                                                                                                                                                                                                                                       |            |
|-----|---------------------------------------------------------------------------------------------------------------------------------------------------------------------------------------------------------------------------------------|------------|
| 378 | Haraguchi S, Hioki M, Hisayoshi T, et al. Resection of sternal tumors and reconstruction of the thorax: A review of 15 patients. <i>Surgery Today</i> . 2006; 36: 225-9.                                                              | Population |
| 379 | Hardt J, Meerpohl JJ, Metzendorf M-I, Kienle P, Post S and Herrle F. Lateral pararectal versus transrectal stoma placement for prevention of parastomal herniation. <i>Cochrane Database Syst Rev</i> . John Wiley & Sons, Ltd, 1996. | Population |
| 380 | Harman BD, Miller NG and Probe RA. Intrathoracic humeral head fracture-dislocation. <i>J Orthop Trauma</i> . 2004; 18: 112-5.                                                                                                         | Population |
| 381 | Hart R, Janecek M, Bucek P and Chaker A. Bilateral clavicular and scapular neck fractures. Case report. <i>Scripta Medica Facultatis Medicae Universitatis Brunensis Masarykianae</i> . 2004; 77: 3-10.                               | Population |
| 382 | Heini PF. Comment on "transpedicle body augments in painful osteoporotic compression fractures" (Kung-Chia Li, Anna F.-Y. Li, Ching-Hsiang Hsieh, Hsiang-Ho Chen). <i>Eur Spine J</i> . 2007; 16: 599-600.                            | Population |
| 383 | Henley MB, Peter RE, Benirschke SK and Ashbaugh D. External fixation of the sternum for thoracic trauma. <i>J Orthop Trauma</i> . 1991; 5: 493-7.                                                                                     | Population |
| 384 | Henry DA, Carless PA, Moxey AJ, et al. Anti-fibrinolytic use for minimising perioperative allogeneic blood transfusion. <i>Cochrane Database Syst Rev</i> . John Wiley & Sons, Ltd, 1996.                                             | Population |
| 385 | Hildebrand F, Giannoudis P, Krettek C and Pape HC. Damage control: extremities. <i>Injury-International Journal of the Care of the Injured</i> . 2004; 35: 678-89.                                                                    | Population |
| 386 | Hirata T, Fukuse T, Mizuno H, Hitomi S and Wada H. Clinical application of biodegradable rib connecting pins in thoracotomy. <i>Thoracic and Cardiovascular Surgeon</i> . 1999; 47: 183-7.                                            | Population |
| 387 | Huang BT. A New Suture Technique Avoids Rib Fractures and Intercostal Nerve Trauma in Thoracotomy. <i>Thoracic and Cardiovascular Surgeon</i> . 2014; 62: 728-9.                                                                      | Population |
| 388 | Huang YP, Tsai FF, Huang CH, Huang HH, Fan SZ and Lin PL. Coronary artery dissection in a patient with traumatic femoral shaft fracture. <i>Acta Anaesthesiologica Taiwanica</i> . 2010; 48: 191-3.                                   | Population |
| 389 | Igai H, Kamiyoshihara M, Nagashima T, Ohtaki Y and Shimizu K. A new application of a wound retractor for chest wall surgery. <i>General Thoracic and Cardiovascular Surgery</i> . 2013; 61: 53-4.                                     | Population |
| 390 | Ishikawa Y, Nakamura T, Kato T, et al. Dosemetric Parameters Predictive of Rib Fractures after Proton Beam Therapy for Early-Stage Lung Cancer. <i>Tohoku Journal of Experimental Medicine</i> . 2016; 238: 339-45.                   | Population |
| 391 | Jahromi AH, Cyrus JW and Youssef AM. Platyabdominalgia: A novel medical terminology describing a symptom. <i>Am Surg</i> . 2013;                                                                                                      | Population |

|     |                                                                                                                                                                                                                                                       |            |
|-----|-------------------------------------------------------------------------------------------------------------------------------------------------------------------------------------------------------------------------------------------------------|------------|
|     | 79: E40-E2.                                                                                                                                                                                                                                           |            |
| 392 | Jones GL. Upper extremity stress fractures. Clinics in Sports Medicine. 2006; 25: 159-74.                                                                                                                                                             | Population |
| 393 | Jutte PC and van Loenhout-Rooyackers JH. Routine surgery in addition to chemotherapy for treating spinal tuberculosis. Cochrane Database Syst Rev. John Wiley & Sons, Ltd, 1996.                                                                      | Population |
| 394 | Kakarla UK, Little AS, Chang SW, Sonntag VKH and Theodore N. Placement of percutaneous thoracic pedicle screws using neuronavigation. World Neurosurgery. 2010; 74: 606-10.                                                                           | Population |
| 395 | Kalaaji A, Lilja J, Elander A and Friede H. Tibia as donor site for alveolar bone grafting in patients with cleft lip and palate: Long term experience. Scandinavian Journal of Plastic and Reconstructive Surgery and Hand Surgery. 2001; 35: 35-42. | Population |
| 396 | Karger B, Fracasso T and Pfeiffer H. Fatalities related to medical restraint devices - Asphyxia is a common finding. Forensic Science International. 2008; 178: 178-84.                                                                               | Population |
| 397 | Kaufman JM and Goemaere S. Osteoporosis in men. Best Practice and Research: Clinical Endocrinology and Metabolism. 2008; 22: 787-812.                                                                                                                 | Population |
| 398 | Kayabasoglu G, Nacar A, Yilmaz MS, Altundag A, Cayonu M and Guven M. A Novel Method for Nasal Dorsal Reconstruction: Permanent Fixation Using Kirschner Wire-Guided Hidden Sutures. Journal of Craniofacial Surgery. 2015; 26: 881-4.                 | Population |
| 399 | Kearsley R, Dalton DM, Motherway C and O'Farrell D. Spinal cord infarction as a rare complication of fat embolism syndrome following bilateral intramedullary nailing of femur fractures. Irish Journal of Medical Science. 2016; 1): S135.           | Population |
| 400 | Khanna P, Lee A and Poon MC. Fracture risk in patients with haemophilia. Haemophilia. 2016; 22: e113-e5.                                                                                                                                              | Population |
| 401 | Khodadadyan C, Hoffmann R, Neumann K and Sudkamp NP. Unrecognized pneumothorax as a cause of intraspinal air. Spine. 1995; 20: 838-40.                                                                                                                | Population |
| 402 | Khoriati AA, Rajakulasingam R and Shah R. Sternal fractures and their management. Journal of Emergencies, Trauma and Shock. 2013; 6: 113-6.                                                                                                           | Population |
| 403 | Kilian E, Mair H, Reichart B and Lamm P. Sternal closure after median sternotomy: A new technique using titanium hooks and wires applied parasternally. Interactive Cardiovascular and Thoracic Surgery. 2013; 16: 721-3.                             | Population |
| 404 | Kim W and McKee MD. Management of acute clavicle fractures. Orthop Clin North Am. 2008; 39: 491-505, vii.                                                                                                                                             | Population |
| 405 | Kirmani BH, Jones SG, Chung DA, Williams RJN and Malaisrie SC. Limited versus full sternotomy for aortic valve replacement. Cochrane Database Syst Rev. John Wiley & Sons, Ltd, 1996.                                                                 | Population |

|     |                                                                                                                                                                                                                                        |            |
|-----|----------------------------------------------------------------------------------------------------------------------------------------------------------------------------------------------------------------------------------------|------------|
| 406 | Labbe JL, Peres O, Leclair O, Goulon R, Scemama P and Jourdel F. Fractures of the upper transthoracic cage. <i>Journal of Bone and Joint Surgery - Series B</i> . 2009; 91: 91-6.                                                      | Population |
| 407 | Lamm M, Henriksen SEH and Eiskjoer S. Acute traumatic L5-S1 spondylolisthesis. <i>Journal of Spinal Disorders</i> . 2003; 16: 524-7.                                                                                                   | Population |
| 408 | Langton TJ and Walker JL. Perioperative management of the patient with coronary stents. <i>International Anesthesiology Clinics</i> . 2011; 49: 20-5.                                                                                  | Population |
| 409 | Latalski M, Fatyga M and Gregosiewicz A. Problems and complications in VEPTR-based treatment. <i>Ortopedia, traumatologia, rehabilitacja</i> . 2011; 13: 449-55.                                                                       | Population |
| 410 | Lee SH, Grant R, Kennedy C and Kilbride L. Positioning and spinal bracing for pain relief in metastatic spinal cord compression in adults. <i>Cochrane Database Syst Rev</i> . John Wiley & Sons, Ltd, 1996.                           | Population |
| 411 | Lee YS, Kim BK, Lee HJ and Dan J. Pathologic femoral neck fracture due to fanconi syndrome induced by adefovir dipivoxil therapy for hepatitis B. <i>CiOS Clinics in Orthopedic Surgery</i> . 2016; 8: 232-6.                          | Population |
| 412 | Lenza M, Buchbinder R, Johnston RV, Belloti JC and Faloppa F. Surgical versus conservative interventions for treating fractures of the middle third of the clavicle. <i>Cochrane Database Syst Rev</i> . John Wiley & Sons, Ltd, 1996. | Population |
| 413 | Leonard M, Ibrahim M, McKenna P, Boran S and McCormack D. Paediatric pelvic ring fractures and associated injuries. <i>Injury</i> . 2011; 42: 1027-30.                                                                                 | Population |
| 414 | Leung KS and Lam TP. Open reduction and internal fixation of ipsilateral fractures of the scapular neck and clavicle. <i>Journal of Bone and Joint Surgery - Series A</i> . 1993; 75: 1015-8.                                          | Population |
| 415 | Lewis SR, Butler AR, Brammar A, Nicholson A and Smith AF. Perioperative fluid volume optimization following proximal femoral fracture. <i>Cochrane Database Syst Rev</i> . John Wiley & Sons, Ltd, 1996.                               | Population |
| 416 | Lin HL, Lin JN, Lee WC, Chen CW and Kuo LC. Blunt Abdominal Injury With Isolated Gallbladder Hematoma. <i>Tzu Chi Medical Journal</i> . 2009; 21: 323-6.                                                                               | Population |
| 417 | Lin J, Shen PW and Hou SM. Complications of locked nailing in humeral shaft fractures. <i>Journal of Trauma-Injury Infection and Critical Care</i> . 2003; 54: 943-9.                                                                  | Population |
| 418 | Liporace FA, Yoon RS, Frank MA, Maurer JP and Gaines RJ. Single-Stage Total Hip Arthroplasty and Fracture Fixation for a Both Column Acetabular Fracture in Type i Osteogenesis Imperfecta. <i>Injury</i> . 2011; 42: 1184-7.          | Population |
| 419 | Liu C-j and Latham NK. Progressive resistance strength training for improving physical function in older adults. <i>Cochrane</i>                                                                                                       | Population |

|     |                                                                                                                                                                                                                                                   |            |
|-----|---------------------------------------------------------------------------------------------------------------------------------------------------------------------------------------------------------------------------------------------------|------------|
|     | Database Syst Rev. John Wiley & Sons, Ltd, 1996.                                                                                                                                                                                                  |            |
| 420 | Lohse GR and Lee DH. Clavicle fracture with intrathoracic displacement. Orthopedics. 2013; 36: e1099-e102.                                                                                                                                        | Population |
| 421 | Malavolta EA, Assuncao JH, Gracitelli MEC, Lobo FL and Ferreira Neto AA. Fracture of the clavicle and second rib: an indirect injury from tricep dips. Journal of Sports Medicine and Physical Fitness. 2016; 56: 909-12.                         | Population |
| 422 | Marchetti A, Jayachandran A and Guha A. Post-traumatic invasive mucormycosis. Journal of the Intensive Care Society. 2011; 12: 143-4.                                                                                                             | Population |
| 423 | Mauldin FW, Owen K, Hossack JA and Ieee. Specular surface reconstruction from multi-angle interrogation (SRMI) using a piston-array-based transducer for enhanced bone delineation. 2012, p.366-9.                                                | Population |
| 424 | Mayba, II. Non-union of fractures of the sternum. J Bone Joint Surg Am. 1985; 67: 1091-3.                                                                                                                                                         | Population |
| 425 | Mayberry J. Invited commentary. Ann Thorac Surg. 2014; 98: 489.                                                                                                                                                                                   | Population |
| 426 | Mayes J, Davison E, Panahi P, et al. An anatomical evaluation of the serratus anterior plane block. Anaesthesia. 2016; 71: 1064-9.                                                                                                                | Population |
| 427 | Millo NZ, Plewes C, Rowe BH and Low G. Appropriateness of CT of the chest, abdomen, and pelvis in motorized blunt force trauma patients without signs of significant injury. American Journal of Roentgenology. 2011; 197: 1393-8.                | Population |
| 428 | Milne AC, Potter J, Vivanti A and Avenell A. Protein and energy supplementation in elderly people at risk from malnutrition. Cochrane Database Syst Rev. John Wiley & Sons, Ltd, 1996.                                                            | Population |
| 429 | Miner JR, Rubin J, Clark J and Reardon RF. Retrograde intubation with an extraglottic device in place. Journal of Emergency Medicine. 2015; 49: 864-7.                                                                                            | Population |
| 430 | Mirza A, Litwa J and Appelbe G. Late presenting volar radiocarpal fracture-dislocation. Current Orthopaedic Practice. 2013; 24: 220-4.                                                                                                            | Population |
| 431 | Mischke C, Verbeek JH, Saarto A, Lavoie M-C, Pahwa M and Ijaz S. Gloves, extra gloves or special types of gloves for preventing percutaneous exposure injuries in healthcare personnel. Cochrane Database Syst Rev. John Wiley & Sons, Ltd, 1996. | Population |
| 432 | Mladenovic D, Mladenovic M, Stojiljkovic P, Micic I and Karalejic S. Surgical treatment of dislocated fracture of the scapula column and glenoid: A 22-year follow-up. Vojnosanit Pregl. 2015; 72: 181-4.                                         | Population |
| 433 | Monticone M, Cedraschi C, Ambrosini E, et al. Cognitive-behavioural treatment for subacute and chronic neck pain. Cochrane Database Syst Rev. John Wiley & Sons, Ltd, 1996.                                                                       | Population |



|     |                                                                                                                                                                                                                                                                                                                                       |            |
|-----|---------------------------------------------------------------------------------------------------------------------------------------------------------------------------------------------------------------------------------------------------------------------------------------------------------------------------------------|------------|
| 434 | Morey AF and Geracci JJ. Bladder entrapment after external fixation of traumatic pubic diastasis: Importance of follow-up computed tomography in establishing prompt diagnosis. <i>Military Medicine</i> . 2000; 165: 492-3.                                                                                                          | Population |
| 435 | Mukalel JJ, Modi HC, Altamirano A, Pivalizza EGG and Cattano D. Thromboelastogram with platelet mapping as a marker of assurance for peripheral nerve block and patients on clopidogrel and aspirin. <i>Regional Anesthesia and Pain Medicine Conference: 37th Annual Regional Anesthesia Meeting and Workshops, ASRA</i> . 2012; 37. | Population |
| 436 | Mulawka B, Jacobson AR, Schroder LK and Cole PA. Triple and quadruple disruptions of the superior shoulder suspensory complex. <i>J Orthop Trauma</i> . 2015; 29: 264-70.                                                                                                                                                             | Population |
| 437 | Nallathamby V, Lee H, Lin YY, Lim J, Ong WC and Lim TC. Retained broken implants in the craniomaxillofacial skeleton. <i>Craniomaxillofacial Trauma and Reconstruction</i> . 2014; 7: 154-7.                                                                                                                                          | Population |
| 438 | Nelson A, Ahmed S, Harrow J, Fitzgerald S, Sanchez-Anguiano A and Gavin-Dreschnack D. Fall-related fractures in persons with spinal cord impairment: a descriptive analysis. <i>SCI nursing : a publication of the American Association of Spinal Cord Injury Nurses</i> . 2003; 20: 30-7.                                            | Population |
| 439 | Neunaber C, Oestern S, Andruszkow H, et al. Cytokine productive capacity of alveolar macrophages and Kupffer cells after femoral fracture and blunt chest trauma in a murine trauma model. <i>Immunology Letters</i> . 2013; 152: 159-66.                                                                                             | Population |
| 440 | Ng CY and Watts AC. The use of non-vascularised osteochondral autograft for reconstruction of articular surfaces in the hand and wrist. <i>Journal of Bone and Joint Surgery-British Volume</i> . 2012; 94B: 1448-54.                                                                                                                 | Population |
| 441 | Niemeier T, Leddy L, Bolster M and Chapin R. Insufficiency fracture associated with oncogenic osteomalacia. <i>Journal of Clinical Rheumatology</i> . 2013; 19: 38-42.                                                                                                                                                                | Population |
| 442 | Nisenblat V, Bossuyt PMM, Farquhar C, Johnson N and Hull ML. Imaging modalities for the non-invasive diagnosis of endometriosis. <i>Cochrane Database Syst Rev</i> . John Wiley & Sons, Ltd, 1996.                                                                                                                                    | Population |
| 443 | Nishimura K, Hamasaki T, Ohno T, Nishihara A, Ito H and Ishiguro S. Revascularization for acute blunt popliteal artery injury. <i>Acute Medicine and Surgery</i> . 2016; 3: 276-8.                                                                                                                                                    | Population |
| 444 | Obert L, Lepage D, Sergent P, et al. Post-traumatic malunion of the distal radius treated with autologous costal cartilage graft: A technical note on seven cases. <i>Orthopaedics &amp; Traumatology-Surgery &amp; Research</i> . 2011; 97: 430-7.                                                                                   | Population |
| 445 | Ogawa F, Naito M, Iyoda A and Satoh Y. Report of a rare case: occult hemothorax due to blunt trauma without obvious injury to other organs. <i>J Cardiothorac Surg</i> . 2013; 8.                                                                                                                                                     | Population |

|     |                                                                                                                                                                                                                                                             |            |
|-----|-------------------------------------------------------------------------------------------------------------------------------------------------------------------------------------------------------------------------------------------------------------|------------|
| 446 | Okamoto Y, Murakami H, Demura S, et al. The effect of kyphotic deformity because of vertebral fracture: a finite element analysis of a 10 degrees and 20 degrees wedge-shaped vertebral fracture model. <i>Spine Journal</i> . 2015; 15: 713-20.            | Population |
| 447 | Orrell RW, Copeland S and Rose MR. Scapular fixation in muscular dystrophy. <i>Cochrane Database Syst Rev</i> . John Wiley & Sons, Ltd, 1996.                                                                                                               | Population |
| 448 | Page MJ, Green S, McBain B, et al. Manual therapy and exercise for rotator cuff disease. <i>Cochrane Database Syst Rev</i> . John Wiley & Sons, Ltd, 1996.                                                                                                  | Population |
| 449 | Pai RB, Hegde HV, Srikanth V and Rao PR. Severe unilateral bronchospasm due to inadequate anesthetic depth: A case report and review of literature. <i>Saudi Journal of Anaesthesia</i> . 2012; 6: 186-8.                                                   | Population |
| 450 | Pakula AM, Phillips W and Skinner RA. A case of a traumatic chyle leak following an acute thoracic spine injury: successful resolution with strict dietary manipulation. <i>World Journal of Emergency Surgery</i> . 2011; 6.                               | Population |
| 451 | Pape HC, Giannoudis P and Krettek C. The timing of fracture treatment in polytrauma patients: relevance of damage control orthopedic surgery. <i>Am J Surg</i> . 2002; 183: 622-9.                                                                          | Population |
| 452 | Pape HC, Hildebrand F, Pertschy S, et al. Changes in the management of femoral shaft fractures in polytrauma patients: From early total care to damage control orthopedic surgery. <i>J Orthop Trauma</i> . 2004; 18: S13-S22.                              | Population |
| 453 | Pape HC, Rixen D, Morley J, et al. Impact of the method of initial stabilization for femoral shaft fractures in patients with multiple injuries at risk for complications (borderline patients). <i>Annals of Surgery</i> . 2007; 246: 491-501.             | Population |
| 454 | Pape HC. Immediate fracture fixation - Which method? Comments on the John Border Memorial Lecture, Ottawa, 2005. <i>J Orthop Trauma</i> . 2006; 20: 341-50.                                                                                                 | Population |
| 455 | Park CH, Shon OJ, Seo JS and Kim GB. Midshaft clavicle fracture with ipsilateral acromioclavicular joint separation found during serial follow-up. <i>Journal of Orthopaedic Science</i> . 2016; 21: 399-402.                                               | Population |
| 456 | Pavelescu D, Dumitrascu M, Luca Vasiliu I, Mirea L and Grintescu I. Postoperative, prolonged and refractory cerebral salt wasting syndrome (CSWS) after severe head trauma - What should we do? <i>European Journal of Anaesthesiology</i> . 2013; 30: 199. | Population |
| 457 | Pelias ME, Townsend MC and Flancbaum L. Long bone fractures predispose to pulmonary dysfunction in blunt chest trauma despite early operative fixation. <i>Surgery</i> . 1992; 111: 576-9.                                                                  | Population |
| 458 | Perry CW, Phillips BJ, Matthews MR and Caruso DM. Incidental finding of ascaris in a trauma patient. <i>Journal of Trauma - Injury, Infection and Critical Care</i> . 1999; 47: 611-2.                                                                      | Population |

|     |                                                                                                                                                                                                                                               |            |
|-----|-----------------------------------------------------------------------------------------------------------------------------------------------------------------------------------------------------------------------------------------------|------------|
| 459 | Petscavage JM, Ha AS, Khorashadi L, Perrich K and Chew FS. New and improved orthopedic hardware for the 21st century: Part 2, lower extremity and axial skeleton. <i>American Journal of Roentgenology</i> . 2011; 197: W434-W44.             | Population |
| 460 | Poole P, Chacko EE, Wood-Baker R and Cates CJ. Influenza vaccine for patients with chronic obstructive pulmonary disease. <i>Cochrane Database Syst Rev</i> . John Wiley & Sons, Ltd, 1996.                                                   | Population |
| 461 | Post M. Current concepts in the treatment of fractures of the clavicle. <i>Clinical orthopaedics and related research</i> . 1989: 89-101.                                                                                                     | Population |
| 462 | Powell R, Scott NW, Manyande A, et al. Psychological preparation and postoperative outcomes for adults undergoing surgery under general anaesthesia. <i>Cochrane Database Syst Rev</i> . John Wiley & Sons, Ltd, 1996.                        | Population |
| 463 | Poyanli O, Guven M, Unay K, Akan KH and Esenkaya A. An unusual combination of extremity fractures: Xoating body injury. <i>European Journal of Orthopaedic Surgery and Traumatology</i> . 2010; 20: 323-8.                                    | Population |
| 464 | Pulavarti RS, Symes TH and Rangan A. Surgical interventions for anterior shoulder instability in adults. <i>Cochrane Database Syst Rev</i> . John Wiley & Sons, Ltd, 1996.                                                                    | Population |
| 465 | Quwatli Z, Sivaraman S and Rishi M. Posttraumatic pulmonary pseudocysts (PPP). <i>Chest Conference: CHEST</i> . 2011; 140.                                                                                                                    | Population |
| 466 | Raman J, Onsager D and Straus D. Rib osteotomy and fixation: Enabling technique for better minithoracotomy exposure in cardiac and thoracic procedures. <i>Journal of Thoracic and Cardiovascular Surgery</i> . 2010; 139: 1083-5.            | Population |
| 467 | Raman J. Rigid Plate Fixation Promotes Better Bone Healing After Sternotomy. <i>Seminars in Thoracic and Cardiovascular Surgery</i> . 2012; 24: 147-50.                                                                                       | Population |
| 468 | Rancan M, Esser MP and Kossmann T. Irreducible traumatic obturator hip dislocation with subcapital indentation fracture of the femoral neck: A case report. <i>Journal of Trauma - Injury, Infection and Critical Care</i> . 2007; 62: E4-E6. | Population |
| 469 | Recknagel S, Bindl R, Wehner T, et al. Conversion from external fixator to intramedullary nail causes a second hit and impairs fracture healing in a severe trauma model. <i>Journal of Orthopaedic Research</i> . 2013; 31: 465-71.          | Population |
| 470 | Reichmister J and Jay P. Atypical fractures associated with long-term bisphosphonate use. <i>Clinical Geriatrics</i> . 2012; 20: 17-21.                                                                                                       | Population |
| 471 | Reilly BM, Hart PD, Mascarell S and Chatrath H. Clinical problem-solving. A question well put. <i>N Engl J Med</i> . 2009; 360: 1446-51.                                                                                                      | Population |
| 472 | Rispoli C, Andreuccetti J, Iannone L, Armellino M and Rispoli G. Anorectal avulsion: Management of a rare rectal trauma. <i>International Journal of Surgery Case Reports</i> . 2012; 3: 319-21.                                              | Population |
| 473 | Rolph R, Duffy JMN and Waltham M. Stent graft types for endovascular repair of thoracic aortic aneurysms. <i>Cochrane Database</i>                                                                                                            | Population |

|     |                                                                                                                                                                                                                                                                                                            |            |
|-----|------------------------------------------------------------------------------------------------------------------------------------------------------------------------------------------------------------------------------------------------------------------------------------------------------------|------------|
|     | Syst Rev. John Wiley & Sons, Ltd, 1996.                                                                                                                                                                                                                                                                    |            |
| 474 | Romano L, Giovine S, Guidi G, Tortora G, Cinque T and Romano S. Hepatic trauma: CT findings and considerations based on our experience in emergency diagnostic imaging. <i>European Journal of Radiology</i> . 2004; 50: 59-66.                                                                            | Population |
| 475 | Roncevic R and Stajic Z. SURGICAL-TREATMENT OF POSTTRAUMATIC ENOPHTHALMOS - A STUDY OF 72 PATIENTS. <i>Annals of Plastic Surgery</i> . 1994; 32: 288-94.                                                                                                                                                   | Population |
| 476 | Rosenfeld HE, Limb R, Chan P, Fitzgerald M, Bradley WPL and Rosenfeld JV. Challenges in the surgical management of spine trauma in the morbidly obese patient: A case series. <i>Journal of Neurosurgery: Spine</i> . 2013; 19: 101-9.                                                                     | Population |
| 477 | Ryan G and Cavallucci D. Traumatic abdominal intercostal hernia without diaphragmatic injury. <i>Trauma</i> . 2011; 13: 364-7.                                                                                                                                                                             | Population |
| 478 | Safranek J. Sternal fractures and their surgical treatment. <i>Acta Chirurgiae Orthopaedicae et Traumatologiae Cechoslovaca</i> . 2015; 82: 76-9.                                                                                                                                                          | Population |
| 479 | Saglam F, Saglam S, Gulabi D, Eceviz E, Elmali N and Yilmaz M. Bilateral clavicle osteomyelitis: A case report. <i>International Journal of Surgery Case Reports</i> . 2014; 5: 932-5.                                                                                                                     | Population |
| 480 | Saleh A, Potemkowski A and Abu-Zidan FM. Endovascular aortic stent graft repair for blunt traumatic thoracic aortic transection. <i>Singapore Medical Journal</i> . 2008; 49: 847-8.                                                                                                                       | Population |
| 481 | Samartzis D, Shen FH, Khanna N, Fairbank J and An H. Local anesthetic at the iliac crest donor-site for postoperative pain management in spine surgery patients. <i>Cochrane Database Syst Rev</i> . John Wiley & Sons, Ltd, 1996.                                                                         | Population |
| 482 | Saratzis NA, Saratzis AN, Melas N, et al. Endovascular repair of traumatic rupture of the thoracic aorta: Single-center experience. <i>Cardiovascular and Interventional Radiology</i> . 2007; 30: 370-5.                                                                                                  | Population |
| 483 | Schlechta B, Wiedemann D, Eppel W and Kocher A. Uncomplicated vaginal delivery 6 years after stent graft repair of an acute traumatic aortic transection. <i>Interactive Cardiovascular and Thoracic Surgery</i> . 2012; 14: 120-1.                                                                        | Population |
| 484 | Schochl H, Posch A, Hanke A, Voelckel W and Solomon C. High-dose fibrinogen concentrate for haemostatic therapy of a major trauma patient with recent clopidogrel and aspirin intake. <i>Scandinavian Journal of Clinical and Laboratory Investigation</i> . 2010; 70: 453-7.                              | Population |
| 485 | Schulz-Drost S, Syed J, Besendoerfer M and Carbon RT. Sternocostal Dislocation Following Open Correction of Pectus Excavatum-"Stairway Phenomenon": Complication Management by Means of Sternocostal Locking Titanium Plate Osteosynthesis. <i>Thoracic and Cardiovascular Surgeon</i> . 2014; 62: 245-52. | Population |

|     |                                                                                                                                                                                                                                                                                         |            |
|-----|-----------------------------------------------------------------------------------------------------------------------------------------------------------------------------------------------------------------------------------------------------------------------------------------|------------|
| 486 | Schwagten V, Beaucourt L and Van Schil P. Traumatic manubriosternal joint disruption: Case report. Journal of Trauma. 1994; 36: 747-8.                                                                                                                                                  | Population |
| 487 | Schwarz N and Hocker K. OSTEOSYNTHESIS OF IRREDUCIBLE FRACTURES OF THE CLAVICLE WITH 2.7-MM ASIF PLATES. Journal of Trauma-Injury Infection and Critical Care. 1992; 33: 179-83.                                                                                                        | Population |
| 488 | Seder CW, Allen MS, Nichols FC, et al. Primary and Prosthetic Repair of Acquired Chest Wall Hernias: A 20-Year Experience. Ann Thorac Surg. 2014; 98: 484-9.                                                                                                                            | Population |
| 489 | Severson EP, Thompson CA, Resig SG and Swiontkowski MF. Transverse sternal nonunion, repair and revision: A case report and review of the literature. Journal of Trauma - Injury, Infection and Critical Care. 2009; 66: 1485-8.                                                        | Population |
| 490 | Shahar R, Shamir M and Johnston DE. A technique for management of bite wounds of the thoracic wall in small dogs. Veterinary Surgery. 1997; 26: 45-50.                                                                                                                                  | Population |
| 491 | Shapiro S, Abel T and Rodgers RB. Traumatic thoracic spinal fracture dislocation with minimal or no cord injury: Report of four cases and review of the literature. Journal of Neurosurgery. 2002; 96: 333-7.                                                                           | Population |
| 492 | Sharma R and Tam RK. Migrating foreign body in mediastinum--intravascular Steinman pin. Interact Cardiovasc Thorac Surg. 2011; 12: 883-4.                                                                                                                                               | Population |
| 493 | Shimizu J, Murata S, Arano Y, Kamesui T, Moriya M and Hayashi S. Partial sternal resection for metastasis to the sternal body and reconstruction with titanium plates: Report of two cases. Chirurgia (Turin). 2015; 28: 89-93.                                                         | Population |
| 494 | Shirley PJ. Trauma and critical care III: Chest trauma. Trauma. 2005; 7: 133-42.                                                                                                                                                                                                        | Population |
| 495 | Sia WT, Xu GG, Puhaindran ME, Tan BK, Cheng MHW and Chew WYC. Reconstruction of Extensive Soft-Tissue Defects with Concomitant Bone Defects in the Lower Extremity with the Latissimus Dorsi-Serratus Anterior-Rib Free Flap. Journal of Reconstructive Microsurgery. 2015; 31: 407-13. | Population |
| 496 | Sikes JW, Jr., Smith BR and Mukherjee DP. An in vitro study of the effect of bony buttressing on fixation strength of a fractured atrophic edentulous mandible model. J Oral Maxillofac Surg. 2000; 58: 56-61; discussion 2.                                                            | Population |
| 497 | Sikes JW, Smith BR, Mukherjee DP and Coward KA. Comparison of fixation strengths of locking head and conventional screws, in fracture and reconstruction models. Journal of Oral and Maxillofacial Surgery. 1998; 56: 468-73.                                                           | Population |
| 498 | Starr AJ and Tolo VT. Timing of femoral fracture stabilization [2] (multiple letters). Journal of Bone and Joint Surgery - Series A. 2001; 83: 293-4.                                                                                                                                   | Population |

|     |                                                                                                                                                                                                                                                        |            |
|-----|--------------------------------------------------------------------------------------------------------------------------------------------------------------------------------------------------------------------------------------------------------|------------|
| 499 | Stawicki SP, Seamon MJ, Carvalho CM, et al. Adrenal gland injury secondary to blunt traumatic mechanisms: A marker of overall injury severity. <i>Endokrynologia Polska</i> . 2009; 60: 2-8.                                                           | Population |
| 500 | Stefani A, Nesci J and Morandi U. STRATOS <sup>TM</sup> system for the repair of pectus excavatum. <i>Interactive Cardiovascular and Thoracic Surgery</i> . 2013; 17: 1056-8.                                                                          | Population |
| 501 | Sugimoto Y, Ito Y, Shimokawa T, Shiozaki Y and Mazaki T. Percutaneous screw fixation for traumatic spondylolisthesis of the axis using iso-c3d fluoroscopy-assisted navigation (Case Report). <i>Minimally Invasive Neurosurgery</i> . 2010; 53: 83-5. | Population |
| 502 | Taggard DA and Traynelis VC. Management of cervical spinal fractures in ankylosing spondylitis with posterior fixation. <i>Spine</i> . 2000; 25: 2035-8.                                                                                               | Population |
| 503 | Taitsman LA, Nork SE, Coles CP, Barei DP and Agel J. Open clavicle fractures and associated injuries. <i>J Orthop Trauma</i> . 2006; 20: 396-9.                                                                                                        | Population |
| 504 | Takarada T, Hojo H, Iemata M, et al. Interference by adrenaline with chondrogenic differentiation through suppression of gene transactivation mediated by Sox9 family members. <i>Bone</i> . 2009; 45: 568-78.                                         | Population |
| 505 | Tanner J and Parkinson H. Double gloving to reduce surgical cross-infection. <i>Cochrane Database Syst Rev</i> . John Wiley & Sons, Ltd, 1996.                                                                                                         | Population |
| 506 | Tatsumi A, Kanemitsu N, Nakamura T and Shimizu Y. Bioabsorbable poly-L-lactide costal coaptation pins and their clinical application in thoracotomy. <i>Ann Thorac Surg</i> . 1999; 67: 765-8.                                                         | Population |
| 507 | Thomas BW, Maxwell RA, Dyer A, Dart BW and Smith PW. Unusual sequelae of blunt liver injury: Laparoscopic resection of a liver abscess and stent failure of an ischemic common bile duct stricture. <i>Am Surg</i> . 2010; 76: E69-E70.                | Population |
| 508 | Ugur HC, Attar A, Uz A, Tekdemir I, Egemen N and Genc Y. Thoracic pedicle: Surgical anatomic evaluation and relations. <i>Journal of Spinal Disorders</i> . 2001; 14: 39-45.                                                                           | Population |
| 509 | Vaishya R, Agarwal AK, Gupta N and Vijay V. Bilateral segmental pelvic and femoral fractures in a young female: A rare case report. <i>Chinese Journal of Traumatology - English Edition</i> . 2016; 19: 286-9.                                        | Population |
| 510 | Vialle LR and Vialle E. Thoracic spine fractures. <i>Injury-International Journal of the Care of the Injured</i> . 2005; 36: 65-72.                                                                                                                    | Population |
| 511 | Vincent KB, Block EFJ and Black J. Traumatic injuries associated with segways and personal transporters. <i>Am Surg</i> . 2009; 75: 722-4.                                                                                                             | Population |
| 512 | Wada S, Kasai F and Mizuma M. Rehabilitation of ipsilateral dislocation fracture of the hip and transfemoral amputation: A case                                                                                                                        | Population |

|     |                                                                                                                                                                                                                                                                                                             |            |
|-----|-------------------------------------------------------------------------------------------------------------------------------------------------------------------------------------------------------------------------------------------------------------------------------------------------------------|------------|
|     | report. PM and R. 2010; 1): S93.                                                                                                                                                                                                                                                                            |            |
| 513 | Walz M, Kolbow B and Auerbach F. Elastic, stable intramedullary nailing in midclavicular fractures - a change in treatment strategies? Unfallchirurg. 2006; 109: 200-+.                                                                                                                                     | Population |
| 514 | Wang SC, Chen CI, Liu CC, Wang CY, Chun-Jen Chen I and Huang MS. Hepatic hydrothorax after blunt chest trauma. Journal of the Chinese Medical Association. 2012; 75: 413-5.                                                                                                                                 | Population |
| 515 | Weddle G, Gandy K, Bratcher D, Pahud B and Jackson MA. Apophysomyces trapeziformis infection associated with a tornado-related injury. Pediatric Infectious Disease Journal. 2012; 31: 640-2.                                                                                                               | Population |
| 516 | Weinberg DS, Napora JK, West WH, Grimberg DC and Vallier HA. Factors associated with narcotic use after clavicle fractures. Orthopedics. 2016; 39: e917-e23.                                                                                                                                                | Population |
| 517 | Westby MD, Kennedy D, Jones D, Jones A, Doyle-Waters MM and Backman C. Post-acute physiotherapy for primary total knee arthroplasty. Cochrane Database Syst Rev. John Wiley & Sons, Ltd, 1996.                                                                                                              | Population |
| 518 | Wiesler ER, Smith AM and Shilt JS. Humeral head fracture-dislocation into the thoracic outlet: case report and review of the literature. J Shoulder Elbow Surg. 2004; 13: 576-9.                                                                                                                            | Population |
| 519 | Wirth MA, Jensen KL, Agarwal A, Curtis RJ and Rockwood Jr CA. Fracture-dislocation of the proximal part of the humerus with retroperitoneal displacement of the humeral head: A case report. Journal of Bone and Joint Surgery - Series A. 1997; 79: 763-6.                                                 | Population |
| 520 | Wong MK, Low MH and Yong R. The femur: A good alternative source of bone graft using a new reamer system when options run out. Singapore Medical Journal. 2013; 54: e38-e42.                                                                                                                                | Population |
| 521 | Wright DEP and Johnstone AJ. The floating shoulder redefined. Journal of Trauma - Injury, Infection and Critical Care. 2010; 68: E26-E9.                                                                                                                                                                    | Population |
| 522 | Wu YS, Lin Y, Zhang XL, et al. Management of hangman's fracture with percutaneous transpedicular screw fixation. Eur Spine J. 2013; 22: 79-86.                                                                                                                                                              | Population |
| 523 | Yalcin M and Aytakin I. An unusual complication: aortic graft perforation by a fractured rib after type B aortic dissection. Interactive Cardiovascular and Thoracic Surgery. 2016; 23: 338-9.                                                                                                              | Population |
| 524 | Yamazaki M, Okawa A, Furuya T, et al. Anomalous Vertebral Arteries in the Extra- and Intraosseous Regions of the Craniovertebral Junction Visualized by 3-Dimensional Computed Tomographic Angiography Analysis of 100 Consecutive Surgical Cases and Review of the Literature. Spine. 2012; 37: E1389-E97. | Population |

|     |                                                                                                                                                                                                                                                        |            |
|-----|--------------------------------------------------------------------------------------------------------------------------------------------------------------------------------------------------------------------------------------------------------|------------|
| 525 | Yu YH, Hsu YH, Chou YC, et al. Sustained relief of pain from osteosynthesis surgery of rib fracture by using biodegradable lidocaine-eluting nanofibrous membranes. <i>Nanomedicine: Nanotechnology, Biology, and Medicine</i> . 2016; 12: 1785-93.    | Population |
| 526 | Zaidenberg EE, Rossi LA, Bongiovanni SL, Tanoira I, Maignon G and Ranalletta M. Snapping scapular syndrome secondary to rib intramedullary fixation device. <i>International Journal of Surgery Case Reports</i> . 2015; 17: 158-60.                   | Population |
| 527 | Zanette G, Micaglio M, Behr AU, Manani G and Facco E. Multiple regional anaesthesia techniques in a high risk surgical patient. [Italian, English]. <i>Acta Anaesthesiologica Italica / Anaesthesia and Intensive Care in Italy</i> . 2008; 59: 174-9. | Population |
| 528 | Zhang H, Zhao Q, He B, Liu J, Hao D and Guo H. Optimal timing for type C3 thoracic fractures with posterior surgical approach: a retrospective cohort study. <i>Journal of Orthopaedic Science</i> . 2015; 20: 689-94.                                 | Population |
| 529 | Zong ZW, Bao QW, Liu HY, et al. Diagnosis and treatment of rare complications of pelvic fractures. <i>Chinese Journal of Traumatology - English Edition</i> . 2016; 19: 199-205.                                                                       | Population |
| 530 | Jiang B, Zhu R, Cao Q and Pan H. Severe thoracic spinal fracture-dislocation without neurological symptoms and costal fractures: A case report and review of the literature. <i>Journal of Medical Case Reports</i> . 2014; 8 (1) (no pagination).     | Population |
| 531 | Manzano JL, Bolanos J, Lubillo S, Romero F and Jato N. Internal costal fixation of fractured ribs in a 6-year-old patient. <i>Crit Care Med</i> . 1982; 10: 67-8.                                                                                      | Population |
| 532 | Pierce MC, Kaczor K, Lohr D, Richter K and Starling SP. A Practical Guide to Differentiating Abusive From Accidental Fractures: An Injury Plausibility Approach. <i>Clinical Pediatric Emergency Medicine</i> . 2012; 13: 166-77.                      | Population |
| 533 | Sartorelli KH and Vane DW. The Diagnosis and Management of Children with Blunt Injury of the Chest. <i>Seminars in Pediatric Surgery</i> . 2004; 13: 98-105.                                                                                           | Population |
| 534 | Yasuda R, Okada H, Shirai K, et al. Comparison of two pediatric flail chest cases. <i>Scandinavian Journal of Trauma Resuscitation &amp; Emergency Medicine</i> . 2015; 23.                                                                            | Population |
| 535 | Matshes EW and Lew EO. Do Resuscitation-Related Injuries Kill Infants and Children? <i>American Journal of Forensic Medicine and Pathology</i> . 2010; 31: 178-85.                                                                                     | Population |
| 536 | Gauger EM, Hill BW, Lafferty PM and Cole PA. Outcomes after operative management of symptomatic rib nonunion. <i>J Orthop Trauma</i> . 2015; 29: 283-9.                                                                                                | Population |
| 537 | Fabricant L, Ham B, Mullins R and Mayberry J. Prospective clinical trial of surgical intervention for painful rib fracture nonunion. <i>Am Surg</i> . 2014; 80: 580-6.                                                                                 | Population |



|     |                                                                                                                                                                                                                                        |                   |
|-----|----------------------------------------------------------------------------------------------------------------------------------------------------------------------------------------------------------------------------------------|-------------------|
| 538 | Ahmed Z. On internal fixation for flail chest - Reply. Journal of Thoracic and Cardiovascular Surgery. 1996; 112: 850-.                                                                                                                | Publication Type  |
| 539 | Doben AR and Pieracci FM. Reply to "open reduction and internal fixation of rib fractures in polytrauma patients with flail chest" by DeFreest et al. American Journal of Surgery. 2016.                                               | Publication Type  |
| 540 | Fabian TC, Hawkins M, Bland K, et al. Discussion. Am Surg. 2007; 73: 596-7.                                                                                                                                                            | Publication Type  |
| 541 | Haasler GB. Use of 3.5-mm acetabular reconstruction plates for internal fixation of flail chest injuries - Invited commentary. Ann Thorac Surg. 1998; 65: 1474-.                                                                       | Publication Type  |
| 542 | Hajj-Chahine J, Jayle C, Houmaida H and Corbi P. eComment. Titanium devices in children. Interact Cardiovasc Thorac Surg. 2012; 15: 595.                                                                                               | Publication Type  |
| 543 | Mayberry J. Invited Commentary: Early Stabilization of Flail Chest With Locked Plate Fixation. J Orthop Trauma. 2011; 25: 648-.                                                                                                        | Publication Type  |
| 544 | Mayberry J and Ham B. Editorial comment. Journal of Trauma - Injury, Infection and Critical Care. 2011; 71: 1552.                                                                                                                      | Publication Type  |
| 545 | Mayberry JC. Editorial comment. Journal of Trauma - Injury, Infection and Critical Care. 2009; 67: 13.                                                                                                                                 | Publication Type  |
| 546 | Oyarzun JR, Bush AP, McCormick JR and Bolanowski PJP. Reconstruction plates for internal fixation of flail chest - Reply. Ann Thorac Surg. 1998; 66: 2158-.                                                                            | Publication Type  |
| 547 | Bastos R, Calhoon JH and Baisden CE. Flail Chest and Pulmonary Contusion. Seminars in Thoracic and Cardiovascular Surgery. 2008; 20: 39-45.                                                                                            | Literature Review |
| 548 | Bemelman M, Poeze M, Blokhuis TJ and Leenen LPH. Historic overview of treatment techniques for rib fractures and flail chest. European Journal of Trauma and Emergency Surgery. 2010; 36: 407-15.                                      | Literature Review |
| 549 | Fitzpatrick DC, Denard PJ, Phelan D, Long WB, Madey SM and Bottlang M. Operative stabilization of flail chest injuries: review of literature and fixation options. European Journal of Trauma and Emergency Surgery. 2010; 36: 427-33. | Literature Review |
| 550 | Forward DP, Ollivere BJ, Ng JWG, Coughlin TA and Rollins KE. Current concepts in rib fracture fixation. Bone & Joint 360. 2016; 5: 2-7.                                                                                                | Literature Review |

|     |                                                                                                                                                                                    |                   |
|-----|------------------------------------------------------------------------------------------------------------------------------------------------------------------------------------|-------------------|
| 551 | Fowler TT, Taylor BC, Bellino MJ and Althausen PL. Surgical Treatment of Flail Chest and Rib Fractures. Journal of the American Academy of Orthopaedic Surgeons. 2014; 22: 751-60. | Literature Review |
| 552 | Gasparri MG, Tisol WB and Haasler GB. Rib stabilization: lessons learned. European Journal of Trauma and Emergency Surgery. 2010; 36: 435-40.                                      | Literature Review |
| 553 | Kiraly L and Schreiber M. Management of the crushed chest. Crit Care Med. 2010; 38: S469-S77.                                                                                      | Literature Review |
| 554 | Lafferty PM, Anavian J, Will RE and Cole PA. Operative treatment of chest wall injuries: indications, technique, and outcomes. J Bone Joint Surg Am. 2011; 93: 97-110.             | Literature Review |
| 555 | Marasco S and Saxena P. Surgical rib fixation - Technical aspects. Injury. 2015; 46: 929-32.                                                                                       | Literature Review |
| 556 | Mayberry JC and Trunkey DD. The fractured rib in chest wall trauma. Chest Surgery Clinics of North America. 1997; 7: 239-61.                                                       | Literature Review |
| 557 | Nirula R, Diaz Jr JJ, Trunkey DD and Mayberry JC. Rib fracture repair: Indications, technical issues, and future directions. World J Surg. 2009; 33: 14-22.                        | Literature Review |
| 558 | Nirula R and Mayberry JC. Rib fracture fixation: Controversies and technical challenges. Am Surg. 2010; 76: 793-802.                                                               | Literature Review |
| 559 | Parry NG, Moffat B and Vogt K. Blunt thoracic trauma: recent advances and outstanding questions. Current Opinion in Critical Care. 2015; 21: 544-8.                                | Literature Review |
| 560 | Pettiford BL, Luketich JD and Landreneau RJ. The Management of Flail Chest. Thorac Surg Clin. 2007; 17: 25-33.                                                                     | Literature Review |
| 561 | Pharaon KS, Marasco S and Mayberry J. Rib Fractures, Flail Chest, and Pulmonary Contusion. Current Trauma Reports. 2015; 1: 237-42.                                                | Literature Review |
| 562 | Qasim Z and Gwinnutt C. Flail chest: Pathophysiology and management. Trauma. 2009; 11: 63-70.                                                                                      | Literature Review |
| 563 | Ranasinghe AM, Hyde JAJ and Graham TR. Management of flail chest. Trauma. 2001; 3: 235-47.                                                                                         | Literature Review |

|     |                                                                                                                                                                                                                                      |                   |
|-----|--------------------------------------------------------------------------------------------------------------------------------------------------------------------------------------------------------------------------------------|-------------------|
| 564 | Senekjian L and Nirula R. Rib Fracture Fixation: Indications and Outcomes. Critical Care Clinics. 2017; 33: 153-65.                                                                                                                  | Literature Review |
| 565 | Simon B, Ebert J, Bokhari F, et al. Management of pulmonary contusion and flail chest: An Eastern Association for the Surgery of Trauma practice management guideline. Journal of Trauma and Acute Care Surgery. 2012; 73: S351-S61. | Literature Review |
| 566 | Sirmali M, Turut H, Topcu S, et al. A comprehensive analysis of traumatic rib fractures: morbidity, mortality and management. Eur J Cardiothorac Surg. 2003; 24: 133-8.                                                              | Literature Review |
| 567 | Zreik NH, Francis MI, Ray A, Rogers BA and Ricketts DM. Blunt chest trauma: bony injury in the thorax. British Journal of Hospital Medicine. 2016; 77: 72-7.                                                                         | Literature Review |
